# Supplementary material for: A more novel and powerful prognostic gene signature of lung adenocarcinoma determined from the immune cell infiltration landscape
Source: PubMed Central journal article supplement (PMC9606711; doi:10.3389/fsurg.2022.1015263), 2022-10-13
Supplement: DataSheet1.pdf [file DataSheet1.pdf]

Figure S1

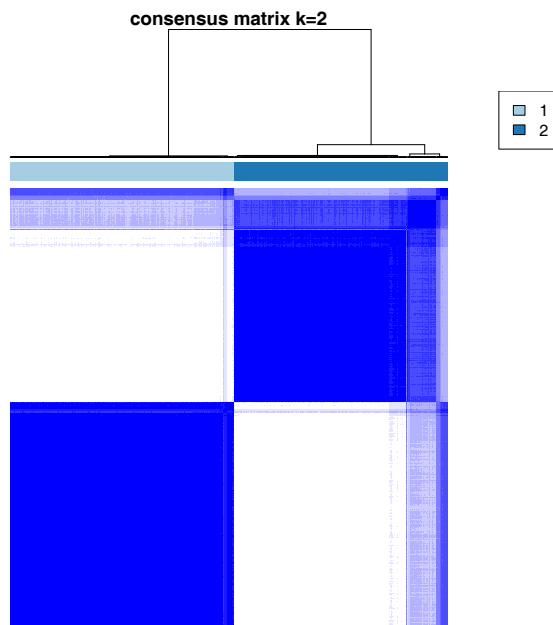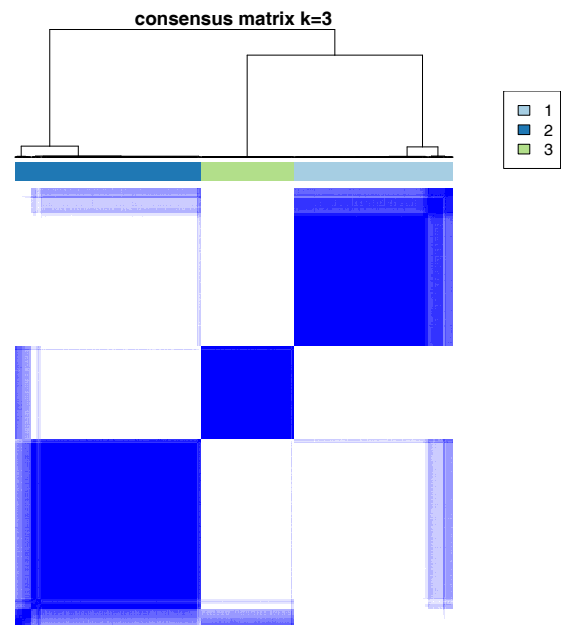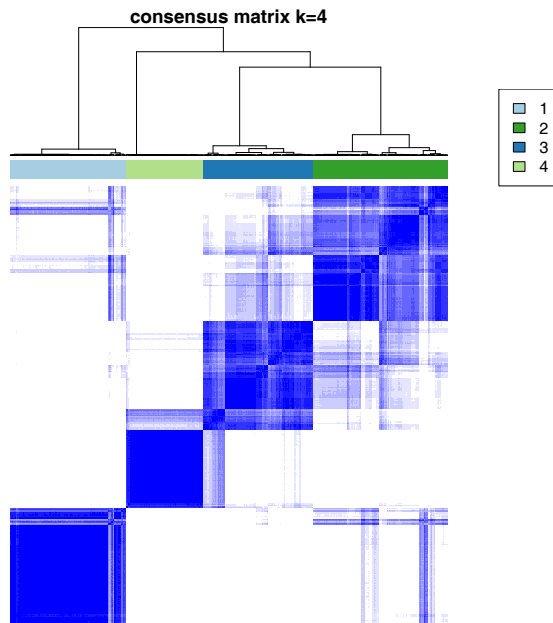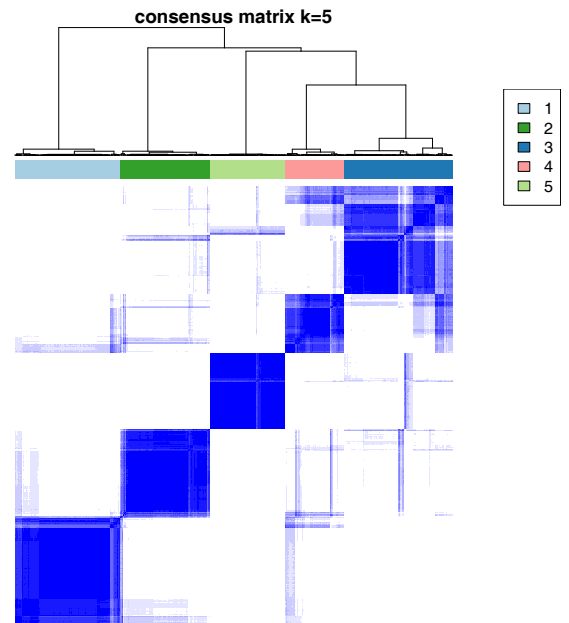

Figure S2

A

Training cohort

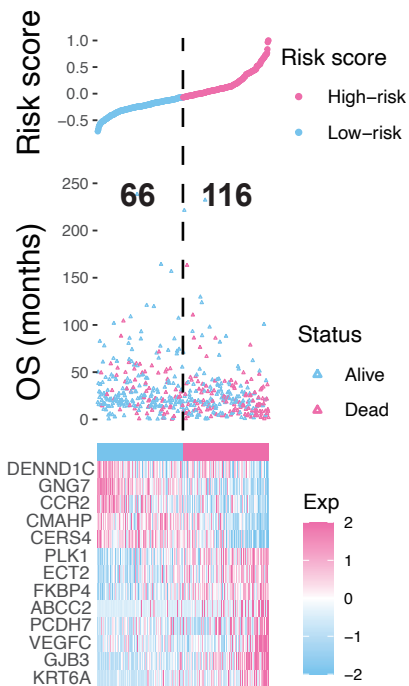

B

Validation cohort one

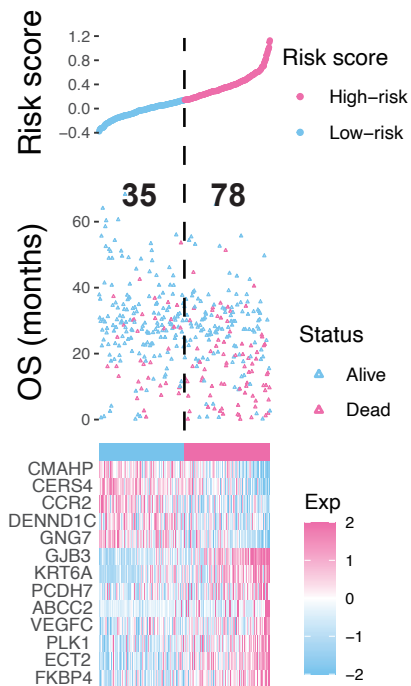

C

Validation cohort two

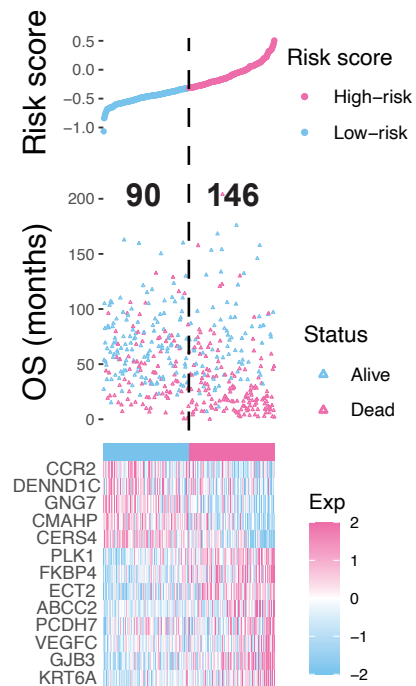

Figure S3

A

## Kaplan–Meier estimator

Level High Low

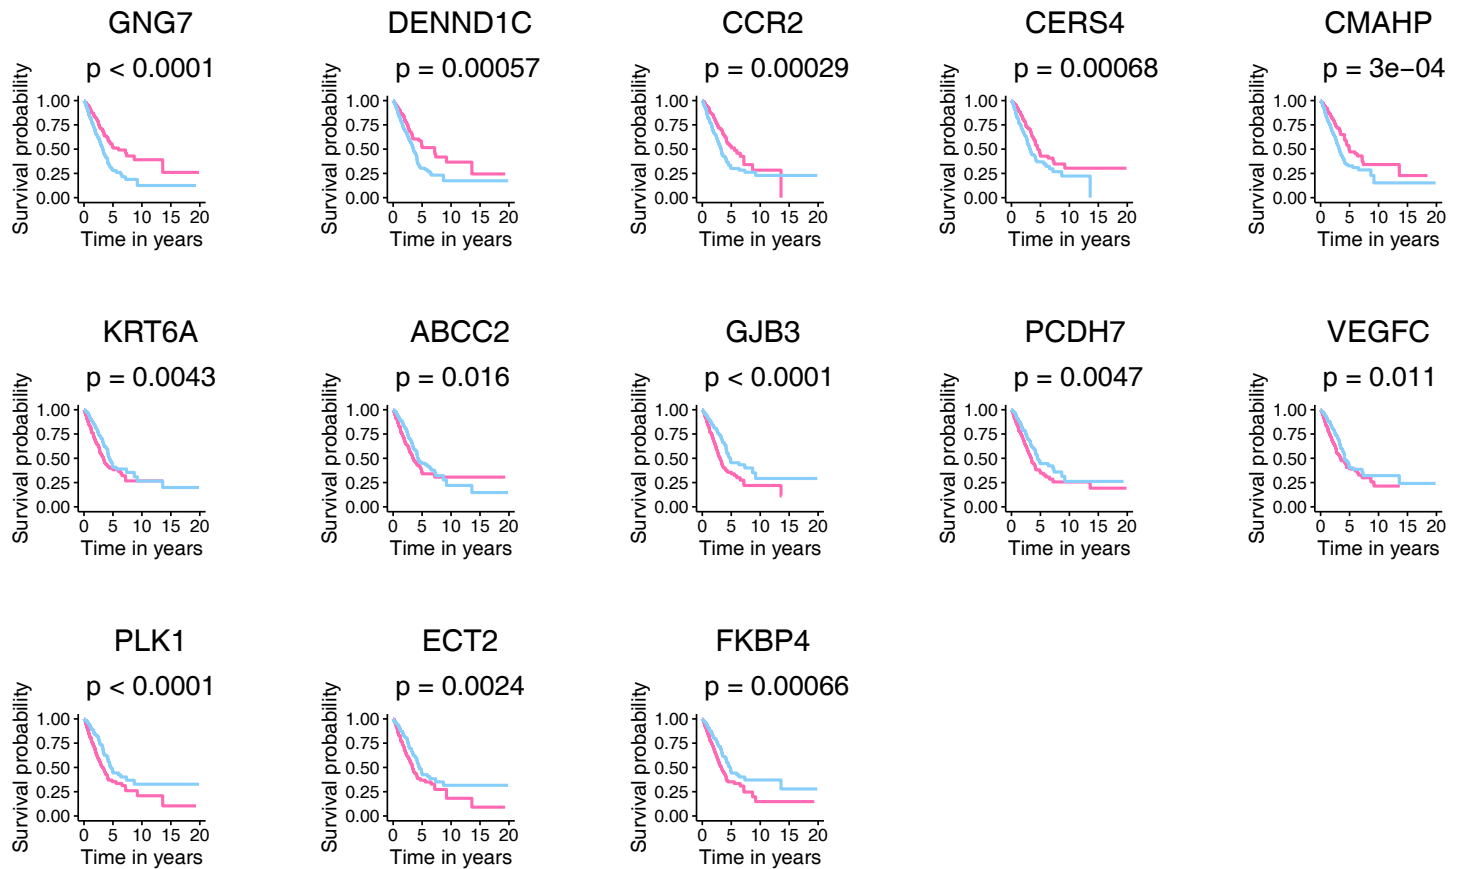

B

## Univariate Cox regression

| ID      | HR    | HR_95L | HR_95H | P-value  |
|---------|-------|--------|--------|----------|
| GNG7    | 0.575 | 0.456  | 0.725  | 3.01E-06 |
| DENND1C | 0.615 | 0.475  | 0.796  | 2.29E-04 |
| CCR2    | 0.657 | 0.537  | 0.805  | 5.01E-05 |
| CERS4   | 0.708 | 0.612  | 0.819  | 3.33E-06 |
| CMAHP   | 0.709 | 0.608  | 0.828  | 1.33E-05 |
| KRT6A   | 1.156 | 1.094  | 1.221  | 2.05E-07 |
| ABCC2   | 1.191 | 1.101  | 1.288  | 1.35E-05 |
| GJB3    | 1.287 | 1.172  | 1.412  | 1.14E-07 |
| PCDH7   | 1.295 | 1.135  | 1.478  | 1.26E-04 |
| VEGFC   | 1.373 | 1.201  | 1.569  | 3.27E-06 |
| PLK1    | 1.405 | 1.215  | 1.625  | 4.46E-06 |
| ECT2    | 1.416 | 1.214  | 1.651  | 8.94E-06 |
| FKBP4   | 1.512 | 1.264  | 1.810  | 6.41E-06 |



**Table S1. Determination of differentially expressed genes between two types of ICI with the threshold parameters of p-value < 0.05 and | log2(fold-change)| > 0.2.**

| <b>ID</b> | <b>log2(fold-change)</b> | <b>average expression</b> | <b>t</b>     | <b>p-value</b> | <b>B</b>    |
|-----------|--------------------------|---------------------------|--------------|----------------|-------------|
| LCP2      | -1.126705738             | 2.586045829               | -23.97017259 | 6.13E-85       | 182.9916104 |
| NCKAP1L   | -1.218276852             | 2.330209997               | -23.94881175 | 7.78E-85       | 182.7547517 |
| EVI2B     | -1.373416382             | 3.532214884               | -23.62683625 | 2.81E-83       | 179.1826832 |
| CD53      | -1.468067369             | 4.855088869               | -23.15794133 | 5.24E-81       | 173.9753614 |
| CD4       | -1.374899572             | 4.459245541               | -23.02967288 | 2.19E-80       | 172.5500044 |
| BTK       | -1.063722036             | 1.88809879                | -23.00462773 | 2.90E-80       | 172.2716596 |
| SASH3     | -1.327954213             | 3.295487363               | -22.68496273 | 1.03E-78       | 168.7181463 |
| WIPF1     | -1.045202306             | 3.037797776               | -22.63581773 | 1.78E-78       | 168.1717182 |
| SNX20     | -0.926084147             | 1.55357536                | -22.58013401 | 3.31E-78       | 167.55256   |
| SELPLG    | -1.30379632              | 3.835612508               | -22.53457487 | 5.51E-78       | 167.0459592 |
| GIMAP4    | -1.21075111              | 3.717538989               | -22.41703935 | 2.05E-77       | 165.7389411 |
| LPXN      | -1.049406091             | 3.322878208               | -22.34653765 | 4.49E-77       | 164.9549135 |
| PTPRC     | -1.486272514             | 3.156232642               | -22.34438147 | 4.60E-77       | 164.930935  |
| HAVCR2    | -1.2504727               | 2.74395073                | -22.25738572 | 1.22E-76       | 163.9634597 |
| DOCK2     | -1.032588524             | 1.786372692               | -22.25381344 | 1.27E-76       | 163.9237322 |
| LAPTM5    | -1.41835288              | 6.328558744               | -22.03155905 | 1.51E-75       | 161.4520427 |
| PLEKHO2   | -0.959055835             | 3.713883738               | -22.02808563 | 1.57E-75       | 161.4134157 |
| CD86      | -1.151778532             | 2.58125386                | -22.02057713 | 1.71E-75       | 161.3299157 |
| PLEK      | -1.456956769             | 3.445970643               | -21.96725678 | 3.10E-75       | 160.7369618 |
| CYTH4     | -1.010757056             | 2.16746093                | -21.72452858 | 4.66E-74       | 158.0379254 |
| GPR65     | -0.788604745             | 1.20160737                | -21.62721918 | 1.38E-73       | 156.9560502 |
| LAIR1     | -1.159448825             | 2.39425368                | -21.53587108 | 3.83E-73       | 155.940568  |
| IKZF1     | -0.996659571             | 1.679444566               | -21.48469493 | 6.78E-73       | 155.3717183 |
| CYBB      | -1.708824733             | 4.307798978               | -21.4409497  | 1.10E-72       | 154.8855025 |
| IL10RA    | -1.176953279             | 2.715780869               | -21.38330288 | 2.10E-72       | 154.2448276 |
| EVI2A     | -1.231384513             | 2.699327621               | -21.26946136 | 7.49E-72       | 152.9798123 |
| RCSD1     | -0.979397461             | 2.010990109               | -21.2650271  | 7.87E-72       | 152.930544  |
| SCIMP     | -0.948743735             | 1.435983046               | -21.17077728 | 2.25E-71       | 151.8834619 |
| GNG2      | -0.788148077             | 1.779391738               | -21.05292134 | 8.38E-71       | 150.5744395 |
| CD84      | -1.10237479              | 1.833541139               | -21.03642433 | 1.01E-70       | 150.3912379 |

|            |              |             |              |          |             |
|------------|--------------|-------------|--------------|----------|-------------|
| TAGAP      | -1.04998519  | 1.994775973 | -21.00460003 | 1.44E-70 | 150.0378465 |
| AIF1       | -1.368098604 | 4.43498511  | -20.94059111 | 2.93E-70 | 149.3271539 |
| CSF2RB     | -1.176414152 | 2.433104492 | -20.89634268 | 4.80E-70 | 148.8359365 |
| MNDA       | -1.408005491 | 3.042466637 | -20.88779067 | 5.28E-70 | 148.7410049 |
| ARHGEF6    | -0.961082164 | 2.177042304 | -20.87525376 | 6.07E-70 | 148.6018431 |
| IL16       | -0.878693667 | 1.461952868 | -20.84273714 | 8.72E-70 | 148.2409275 |
| MS4A6A     | -1.33353716  | 3.122875229 | -20.76439413 | 2.09E-69 | 147.371514  |
| ZEB2       | -0.771382549 | 1.514770545 | -20.75554992 | 2.30E-69 | 147.2733788 |
| WAS        | -1.107531148 | 2.896380135 | -20.71322956 | 3.69E-69 | 146.8038319 |
| CCR5       | -1.147383354 | 2.061322481 | -20.66086228 | 6.62E-69 | 146.2229067 |
| GMFG       | -1.144556681 | 3.813517597 | -20.45896732 | 6.26E-68 | 143.9842581 |
| C3AR1      | -1.350773186 | 3.299990717 | -20.39031849 | 1.34E-67 | 143.223468  |
| SLAMF8     | -1.341633959 | 3.196974957 | -20.37691565 | 1.56E-67 | 143.0749583 |
| CD37       | -1.273847863 | 3.052350218 | -20.25237134 | 6.24E-67 | 141.6953603 |
| TNFAIP8L2  | -1.131458545 | 2.561533239 | -20.25138538 | 6.30E-67 | 141.6844416 |
| SLA        | -1.028289852 | 2.254789944 | -20.22922838 | 8.07E-67 | 141.4390863 |
| IGSF6      | -1.274762565 | 2.794391694 | -20.14218095 | 2.12E-66 | 140.4754125 |
| C10orf128  | -0.89667378  | 1.789604292 | -20.06873725 | 4.80E-66 | 139.6626566 |
| BIN2       | -1.002745174 | 2.092469272 | -19.97494213 | 1.36E-65 | 138.625123  |
| SLCO2B1    | -1.332045153 | 3.056723095 | -19.92981966 | 2.25E-65 | 138.126174  |
| PCED1B-AS1 | -0.950838405 | 1.91185372  | -19.87372964 | 4.19E-65 | 137.5061199 |
| FERMT3     | -1.199760663 | 3.61296167  | -19.87279433 | 4.23E-65 | 137.4957821 |
| IRF8       | -1.185123359 | 2.429668634 | -19.86894163 | 4.41E-65 | 137.4531993 |
| TRPV2      | -1.030199372 | 2.927887794 | -19.86037643 | 4.85E-65 | 137.3585337 |
| CSF1R      | -1.365327006 | 3.844986461 | -19.82658825 | 7.06E-65 | 136.9851396 |
| CD28       | -0.717200933 | 1.021810173 | -19.79816513 | 9.68E-65 | 136.6710906 |
| DOK2       | -1.229499331 | 2.863563226 | -19.77087284 | 1.31E-64 | 136.369585  |
| PLXNC1     | -0.938891712 | 2.131146446 | -19.73542238 | 1.94E-64 | 135.9780259 |
| SPN        | -1.092018542 | 1.920337888 | -19.71460786 | 2.45E-64 | 135.7481629 |
| IL7R       | -1.45424828  | 2.988883347 | -19.65544521 | 4.71E-64 | 135.0949648 |
| SAMSN1     | -1.124675269 | 2.395103344 | -19.63655157 | 5.81E-64 | 134.8864157 |
| MYO1F      | -0.952032722 | 2.242394152 | -19.55737826 | 1.40E-63 | 134.0127662 |
| ARHGAP25   | -0.84581035  | 2.127891503 | -19.55446623 | 1.44E-63 | 133.9806414 |

|              |              |             |              |          |             |
|--------------|--------------|-------------|--------------|----------|-------------|
| RP11-750H9.5 | -0.815340532 | 1.250658997 | -19.52705673 | 1.95E-63 | 133.6782967 |
| CD33         | -0.633412013 | 0.929493241 | -19.52207958 | 2.07E-63 | 133.6234013 |
| TNFSF13B     | -1.1913078   | 2.665332343 | -19.51073426 | 2.34E-63 | 133.498275  |
| 1-Mar        | -0.695361952 | 1.357140535 | -19.50498889 | 2.50E-63 | 133.4349135 |
| ITGAL        | -1.234426297 | 2.622265799 | -19.47827879 | 3.35E-63 | 133.1403792 |
| CLEC4A       | -1.121504312 | 2.234844856 | -19.47597062 | 3.44E-63 | 133.1149293 |
| GIMAP6       | -1.038157872 | 2.586772602 | -19.4678392  | 3.77E-63 | 133.0252753 |
| PDCD1LG2     | -1.048615502 | 1.620087554 | -19.44375659 | 4.92E-63 | 132.7597787 |
| CCR2         | -0.978869686 | 1.480615153 | -19.41283648 | 6.92E-63 | 132.4189664 |
| FPR3         | -1.360017838 | 3.479508128 | -19.35301011 | 1.34E-62 | 131.759747  |
| MPEG1        | -1.271279878 | 3.300222503 | -19.3432518  | 1.49E-62 | 131.6522476 |
| FAM78A       | -0.793388906 | 1.580974778 | -19.34211603 | 1.51E-62 | 131.6397363 |
| AOAH         | -1.096445435 | 1.976947439 | -19.30378991 | 2.31E-62 | 131.2176048 |
| LCP1         | -1.395961484 | 5.142656456 | -19.29109024 | 2.66E-62 | 131.0777538 |
| PILRA        | -1.083909534 | 2.551490602 | -19.2598594  | 3.76E-62 | 130.7338896 |
| TLR4         | -1.041551224 | 2.019543385 | -19.23370982 | 5.02E-62 | 130.4460329 |
| P2RY13       | -1.041033256 | 1.641400905 | -19.22165646 | 5.73E-62 | 130.3133674 |
| PIK3AP1      | -1.144759899 | 2.574355727 | -19.21964416 | 5.86E-62 | 130.2912201 |
| HLA-DQA1     | -1.762866153 | 4.890745085 | -19.21156702 | 6.41E-62 | 130.202327  |
| IL21R        | -0.82790931  | 1.190806377 | -19.19603454 | 7.61E-62 | 130.0313991 |
| TFEC         | -0.779047747 | 1.072100968 | -19.16044936 | 1.13E-61 | 129.6398763 |
| PTPN7        | -0.962570132 | 1.846919754 | -19.12240494 | 1.72E-61 | 129.2214142 |
| ARHGAP30     | -1.074770252 | 2.99786864  | -19.06798878 | 3.13E-61 | 128.6230903 |
| SIRPA        | -1.134006399 | 3.459865089 | -19.05696526 | 3.54E-61 | 128.5019144 |
| TLR7         | -0.790352608 | 1.113234    | -19.02380333 | 5.10E-61 | 128.137447  |
| SPI1         | -1.309312082 | 4.138378829 | -18.95968093 | 1.03E-60 | 127.4329859 |
| GGTA1P       | -0.784669717 | 1.447282063 | -18.89380882 | 2.14E-60 | 126.7096925 |
| TRAC         | -1.419266369 | 3.851740344 | -18.82049444 | 4.80E-60 | 125.9051582 |
| RNASE6       | -1.176375955 | 3.852119914 | -18.80749602 | 5.54E-60 | 125.7625701 |
| LY86         | -1.262624518 | 2.882503159 | -18.76760885 | 8.59E-60 | 125.3251239 |
| ABI3         | -0.927102372 | 2.723727993 | -18.75751129 | 9.60E-60 | 125.2144076 |
| FCER1G       | -1.337796287 | 5.547575698 | -18.71480469 | 1.54E-59 | 124.7462554 |
| IL12RB1      | -0.760369846 | 1.256023588 | -18.69633467 | 1.88E-59 | 124.5438422 |

|          |              |             |              |          |             |
|----------|--------------|-------------|--------------|----------|-------------|
| C1orf162 | -1.070556989 | 2.868175558 | -18.66055802 | 2.79E-59 | 124.1518627 |
| GAS7     | -0.970353166 | 2.0000322   | -18.62802078 | 3.99E-59 | 123.7954879 |
| SLC7A7   | -1.043121515 | 2.85085204  | -18.60799328 | 4.97E-59 | 123.5761841 |
| AMICA1   | -0.997627586 | 1.78484384  | -18.56233079 | 8.22E-59 | 123.0763292 |
| CD80     | -0.522468552 | 0.718596121 | -18.53016422 | 1.17E-58 | 122.7243418 |
| TLR8     | -0.947851154 | 1.270758343 | -18.52165732 | 1.28E-58 | 122.6312721 |
| ITGAM    | -1.241386986 | 2.512764917 | -18.51016407 | 1.46E-58 | 122.5055425 |
| P2RX7    | -0.848942205 | 1.404351111 | -18.48012796 | 2.03E-58 | 122.1770313 |
| CMKLR1   | -1.064091021 | 2.052519112 | -18.4766453  | 2.11E-58 | 122.138947  |
| GLIPR1   | -0.901133172 | 2.127319862 | -18.42846914 | 3.58E-58 | 121.6122563 |
| SIGLEC9  | -0.831687322 | 1.495707101 | -18.40649486 | 4.55E-58 | 121.3721046 |
| ARHGAP9  | -0.960504626 | 1.941395837 | -18.40057492 | 4.86E-58 | 121.3074162 |
| CD2      | -1.384185085 | 3.455222563 | -18.37712492 | 6.28E-58 | 121.0512111 |
| DOCK8    | -0.930868208 | 2.054763764 | -18.36707677 | 7.01E-58 | 120.9414478 |
| MAFB     | -1.129840007 | 3.653432446 | -18.27604815 | 1.90E-57 | 119.9475961 |
| NFAM1    | -0.954786972 | 1.802569323 | -18.27174579 | 1.99E-57 | 119.9006462 |
| GYPC     | -0.933441165 | 2.648493308 | -18.23732916 | 2.91E-57 | 119.5251496 |
| MS4A4A   | -1.259783809 | 3.063130432 | -18.2307799  | 3.12E-57 | 119.4537108 |
| CYTIP    | -1.10946577  | 2.664207207 | -18.20722452 | 4.04E-57 | 119.1968116 |
| CD247    | -0.895412623 | 1.522796782 | -18.19721143 | 4.51E-57 | 119.0876268 |
| TESPA1   | -0.606237274 | 0.837972032 | -18.15617671 | 7.07E-57 | 118.6403002 |
| FLI1     | -0.764245295 | 1.77829754  | -18.12110542 | 1.04E-56 | 118.2581418 |
| LRRC25   | -0.986760492 | 2.248604182 | -18.12102016 | 1.04E-56 | 118.2572129 |
| CD180    | -0.816204645 | 1.368171461 | -18.11912546 | 1.06E-56 | 118.2365713 |
| PIK3CG   | -0.796950461 | 1.193633689 | -18.08367665 | 1.56E-56 | 117.850459  |
| HLA-DMB  | -1.367529676 | 4.15983271  | -18.04973547 | 2.27E-56 | 117.4809121 |
| HCK      | -1.282123627 | 3.360467109 | -18.04124004 | 2.49E-56 | 117.3884373 |
| FCGR1A   | -0.941388506 | 1.631043247 | -18.00408798 | 3.73E-56 | 116.9841336 |
| ICOS     | -0.728913498 | 0.980448609 | -18.00385712 | 3.74E-56 | 116.9816218 |
| GIMAP1   | -0.697922614 | 1.303359607 | -17.99550763 | 4.10E-56 | 116.8907833 |
| PTGER4   | -0.997383894 | 2.029614742 | -17.98872167 | 4.42E-56 | 116.8169617 |
| PIK3R5   | -0.771754486 | 1.480306449 | -17.97779269 | 4.97E-56 | 116.6980822 |
| SAMHD1   | -1.038978656 | 4.560712666 | -17.94391415 | 7.20E-56 | 116.3296658 |



|          |              |             |              |          |             |
|----------|--------------|-------------|--------------|----------|-------------|
| CLEC10A  | -1.19135879  | 1.915775636 | -17.93744926 | 7.73E-56 | 116.2593793 |
| FYB      | -1.154030282 | 2.503959071 | -17.92798984 | 8.57E-56 | 116.1565456 |
| ITGB2    | -1.441035134 | 4.638198252 | -17.91847525 | 9.51E-56 | 116.0531237 |
| FGD2     | -0.738403906 | 1.269834444 | -17.91421553 | 9.96E-56 | 116.0068252 |
| HLA-DRA  | -1.610987986 | 9.824955596 | -17.90088748 | 1.15E-55 | 115.8619786 |
| PLXDC2   | -1.0344091   | 2.767176502 | -17.84789881 | 2.05E-55 | 115.2863369 |
| TRBV20-1 | -1.094749817 | 1.746366545 | -17.8352458  | 2.36E-55 | 115.1489354 |
| GIMAP7   | -1.115523948 | 3.307651483 | -17.81241205 | 3.02E-55 | 114.9010328 |
| ARHGAP15 | -0.629277746 | 1.106548131 | -17.78354707 | 4.14E-55 | 114.5877492 |
| PTPRO    | -0.617511038 | 0.868725576 | -17.7819435  | 4.22E-55 | 114.5703482 |
| CD3E     | -1.281710217 | 2.998527035 | -17.77406367 | 4.59E-55 | 114.4848462 |
| CD300C   | -0.899335352 | 1.562510173 | -17.77346483 | 4.62E-55 | 114.4783487 |
| PSTPIP1  | -0.808976155 | 1.456141476 | -17.76373628 | 5.14E-55 | 114.3727989 |
| SH2B3    | -0.78043234  | 2.823793528 | -17.70968372 | 9.26E-55 | 113.7865896 |
| C1QA     | -1.535663155 | 6.916069014 | -17.64445884 | 1.88E-54 | 113.0797471 |
| TNFSF8   | -0.66977815  | 1.041767031 | -17.63107699 | 2.18E-54 | 112.9348008 |
| FGL2     | -1.333536404 | 3.168580519 | -17.61828676 | 2.50E-54 | 112.7962861 |
| HLA-DPA1 | -1.600358855 | 6.160151565 | -17.61314736 | 2.65E-54 | 112.7406343 |
| SH2D1A   | -0.948380584 | 1.316548047 | -17.60510937 | 2.89E-54 | 112.6536026 |
| LST1     | -1.203482569 | 2.857824027 | -17.58398969 | 3.64E-54 | 112.4249717 |
| NCF1     | -0.781535433 | 1.21973382  | -17.58067064 | 3.77E-54 | 112.3890471 |
| HLA-DOA  | -1.53063153  | 3.779620123 | -17.55027676 | 5.25E-54 | 112.0601438 |
| APBB1IP  | -0.976077811 | 2.415421933 | -17.51869716 | 7.40E-54 | 111.7185494 |
| LAT2     | -0.907702842 | 2.302884557 | -17.47812239 | 1.15E-53 | 111.2798662 |
| TYROBP   | -1.359178311 | 6.120849782 | -17.4736423  | 1.21E-53 | 111.2314434 |
| FMNL3    | -0.644128205 | 2.057147509 | -17.46481839 | 1.33E-53 | 111.1360791 |
| STK10    | -0.75442689  | 2.424324964 | -17.44029457 | 1.73E-53 | 110.8710985 |
| CD52     | -1.46778342  | 5.074449428 | -17.43995387 | 1.74E-53 | 110.8674179 |
| IL2RG    | -1.315125211 | 3.93061561  | -17.39815254 | 2.74E-53 | 110.4159599 |
| HLA-DPB1 | -1.520569028 | 6.917726755 | -17.38075987 | 3.30E-53 | 110.2281942 |
| SIGLEC7  | -0.739150611 | 1.229717473 | -17.37814187 | 3.40E-53 | 110.199935  |
| SLAMF1   | -0.712798605 | 1.069299947 | -17.3578564  | 4.24E-53 | 109.9810047 |
| TRAF3IP3 | -0.749799483 | 1.142685635 | -17.32083536 | 6.33E-53 | 109.5816165 |

|           |              |             |              |          |             |
|-----------|--------------|-------------|--------------|----------|-------------|
| TRBV28    | -1.258900587 | 2.757982991 | -17.30630552 | 7.41E-53 | 109.4249234 |
| CD200R1   | -0.491642847 | 0.699567755 | -17.29511021 | 8.36E-53 | 109.3042126 |
| LILRB1    | -0.814168459 | 1.542631259 | -17.27671867 | 1.02E-52 | 109.105952  |
| FCGR3A    | -1.464131072 | 4.836240186 | -17.26915856 | 1.11E-52 | 109.0244691 |
| C1QC      | -1.524723367 | 6.85272403  | -17.26053354 | 1.22E-52 | 108.9315195 |
| SIRPB2    | -0.657349038 | 1.073177246 | -17.25461745 | 1.30E-52 | 108.86777   |
| CD48      | -1.275457569 | 2.691175745 | -17.2535135  | 1.31E-52 | 108.8558748 |
| NCF2      | -1.18476539  | 3.727286679 | -17.23258364 | 1.64E-52 | 108.6303897 |
| SLAMF6    | -1.069926326 | 1.90614499  | -17.21327486 | 2.03E-52 | 108.4224296 |
| HCST      | -1.105584705 | 3.187107149 | -17.20719752 | 2.16E-52 | 108.3569872 |
| PARVG     | -0.820785547 | 1.67784476  | -17.20158836 | 2.30E-52 | 108.2965916 |
| C1QB      | -1.584717676 | 6.808900828 | -17.20152223 | 2.30E-52 | 108.2958796 |
| STAT5A    | -0.735925949 | 2.736664891 | -17.19744755 | 2.41E-52 | 108.2520093 |
| TRBC2     | -1.415747673 | 3.676321667 | -17.17911134 | 2.93E-52 | 108.0546237 |
| RAC2      | -1.129279764 | 4.677519329 | -17.16771969 | 3.32E-52 | 107.9320216 |
| CXorf21   | -0.806891623 | 1.57246241  | -17.15941874 | 3.63E-52 | 107.842696  |
| PTAFR     | -1.178902558 | 2.880358152 | -17.13170648 | 4.90E-52 | 107.5445668 |
| CORO1A    | -1.10381058  | 3.92013104  | -17.06151412 | 1.04E-51 | 106.7899871 |
| STX11     | -0.905788036 | 2.037671038 | -17.05159973 | 1.16E-51 | 106.6834701 |
| ITK       | -0.728060767 | 0.992047492 | -16.99484653 | 2.15E-51 | 106.0740422 |
| FGR       | -1.052124709 | 2.661544433 | -16.98380649 | 2.42E-51 | 105.9555537 |
| KIAA0226L | -0.525643523 | 0.818892962 | -16.97949948 | 2.53E-51 | 105.9093337 |
| LCK       | -1.085291549 | 2.301628663 | -16.94632414 | 3.62E-51 | 105.5534213 |
| FOLR2     | -1.448712796 | 3.579651719 | -16.90433727 | 5.69E-51 | 105.1032417 |
| LSP1      | -1.15228306  | 3.748688804 | -16.8791388  | 7.46E-51 | 104.8332092 |
| GAB3      | -0.638607444 | 1.224399262 | -16.82779135 | 1.30E-50 | 104.2832941 |
| CASP1     | -0.986887298 | 2.833479928 | -16.80314224 | 1.69E-50 | 104.0194713 |
| DAB2      | -0.953665361 | 3.152388356 | -16.79371642 | 1.87E-50 | 103.9186133 |
| ALOX5AP   | -1.419016825 | 4.253423016 | -16.77392301 | 2.31E-50 | 103.7068707 |
| VSIG4     | -1.556551113 | 4.069408306 | -16.75904282 | 2.71E-50 | 103.5477329 |
| SLC1A3    | -0.913550266 | 1.600599536 | -16.75471058 | 2.84E-50 | 103.5014087 |
| SIT1      | -1.062360046 | 1.856662936 | -16.7525816  | 2.91E-50 | 103.4786449 |
| RGS18     | -0.634130676 | 0.929724671 | -16.74676621 | 3.10E-50 | 103.4164687 |

|              |              |             |              |          |             |
|--------------|--------------|-------------|--------------|----------|-------------|
| ENTPD1       | -0.583662727 | 2.222929991 | -16.74332997 | 3.21E-50 | 103.3797325 |
| PRKCB        | -0.785191333 | 1.338537111 | -16.70898045 | 4.65E-50 | 103.0126222 |
| MSR1         | -1.292124988 | 2.778879174 | -16.70425171 | 4.89E-50 | 102.9621002 |
| TIGIT        | -0.808924812 | 1.230915092 | -16.66247976 | 7.65E-50 | 102.515981  |
| VCAM1        | -1.233948912 | 2.649701616 | -16.66221234 | 7.68E-50 | 102.5131259 |
| ALOX5        | -1.231142619 | 3.593902638 | -16.66121683 | 7.76E-50 | 102.5024979 |
| NLRP3        | -0.645429329 | 1.010819851 | -16.62065614 | 1.20E-49 | 102.0696243 |
| PTPN22       | -0.929900111 | 1.679402202 | -16.60145119 | 1.47E-49 | 101.8647683 |
| PYHIN1       | -0.623639519 | 0.805777799 | -16.57617882 | 1.93E-49 | 101.5952949 |
| LRRC8C       | -0.565221332 | 1.362854629 | -16.5751798  | 1.95E-49 | 101.5846451 |
| RP11-121A8.1 | -0.289631875 | 0.382115817 | -16.53871687 | 2.88E-49 | 101.1960628 |
| SLC15A3      | -1.000181672 | 2.962704481 | -16.5162429  | 3.67E-49 | 100.9566823 |
| ICAM3        | -0.707798969 | 1.110483968 | -16.51081925 | 3.89E-49 | 100.8989266 |
| TRAV13-1     | -0.83931767  | 1.060732835 | -16.49605663 | 4.55E-49 | 100.7417492 |
| EPB41L2      | -0.838151264 | 2.270180722 | -16.47369991 | 5.78E-49 | 100.5037953 |
| CRTAM        | -0.623300187 | 0.804301035 | -16.46746411 | 6.18E-49 | 100.4374412 |
| BCL2A1       | -1.195476528 | 3.072327085 | -16.45963509 | 6.72E-49 | 100.3541444 |
| TRAV9-2      | -0.611207628 | 0.725383765 | -16.44092526 | 8.20E-49 | 100.1551281 |
| MRC1         | -1.672214813 | 3.583135623 | -16.42866822 | 9.35E-49 | 100.024786  |
| GZMK         | -1.239358362 | 1.865080372 | -16.41731808 | 1.06E-48 | 99.90411337 |
| NLRC4        | -0.562902331 | 1.066569447 | -16.41096326 | 1.13E-48 | 99.83656085 |
| OSCAR        | -1.128045625 | 2.475458507 | -16.40880848 | 1.16E-48 | 99.81365698 |
| LTA          | -0.564466904 | 0.722754672 | -16.40731747 | 1.17E-48 | 99.79780916 |
| SLC31A2      | -0.503983273 | 0.904296948 | -16.38529248 | 1.49E-48 | 99.56375567 |
| NCF4         | -1.053371112 | 3.365048212 | -16.38023247 | 1.57E-48 | 99.50999752 |
| CARD8-AS1    | -0.604382169 | 1.431532635 | -16.33018379 | 2.68E-48 | 98.97854021 |
| MS4A7        | -1.118131487 | 2.848581508 | -16.32571776 | 2.81E-48 | 98.93113993 |
| LILRB2       | -0.893833969 | 1.792798894 | -16.32345766 | 2.87E-48 | 98.90715372 |
| GIMAP2       | -0.956447901 | 2.600479439 | -16.30523765 | 3.49E-48 | 98.71382342 |
| RASAL3       | -0.935124781 | 1.996626007 | -16.29086626 | 4.07E-48 | 98.56137625 |
| PTGS1        | -0.916273307 | 2.123298655 | -16.28692327 | 4.24E-48 | 98.51955732 |
| OLFML1       | -0.815283861 | 1.802908318 | -16.28637619 | 4.27E-48 | 98.51375526 |
| GPR34        | -1.071902501 | 2.134004126 | -16.28138944 | 4.50E-48 | 98.46087121 |

|           |              |             |              |          |             |
|-----------|--------------|-------------|--------------|----------|-------------|
| KLHL6     | -0.802419978 | 1.339447931 | -16.28098347 | 4.52E-48 | 98.45656618 |
| FCGR2A    | -1.066337372 | 3.542875602 | -16.25419775 | 6.01E-48 | 98.17259193 |
| SAMD3     | -0.251351002 | 0.274346019 | -16.24862127 | 6.38E-48 | 98.11348961 |
| TRAV8-2   | -0.519791542 | 0.599501445 | -16.24415346 | 6.69E-48 | 98.06614201 |
| HSD11B1   | -1.085431679 | 2.220983619 | -16.22878404 | 7.88E-48 | 97.90329471 |
| TRBV25-1  | -0.532545122 | 0.654745715 | -16.21364115 | 9.26E-48 | 97.74289349 |
| LINC01094 | -0.745825288 | 1.198672625 | -16.19783985 | 1.10E-47 | 97.57556702 |
| ITGA4     | -0.80615965  | 1.634278812 | -16.18669008 | 1.23E-47 | 97.45752759 |
| LILRB4    | -1.162902236 | 2.360137066 | -16.17941764 | 1.33E-47 | 97.38054971 |
| CCR1      | -1.078402476 | 2.842251529 | -16.16744473 | 1.51E-47 | 97.25384125 |
| CD3D      | -1.275033772 | 3.2602803   | -16.10741822 | 2.87E-47 | 96.61902258 |
| TRAV21    | -0.685463681 | 0.824549691 | -16.09868748 | 3.14E-47 | 96.52675061 |
| HCLS1     | -1.052580765 | 3.663191732 | -16.08535127 | 3.62E-47 | 96.38583529 |
| NCF1B     | -0.593329892 | 0.837273291 | -16.06512792 | 4.49E-47 | 96.17221762 |
| TRAV8-6   | -0.554799499 | 0.705495146 | -16.05567484 | 4.96E-47 | 96.07239436 |
| HVCN1     | -0.64874362  | 1.747820196 | -16.04611336 | 5.49E-47 | 95.97144529 |
| APOL3     | -0.998289957 | 2.649664026 | -16.04034864 | 5.84E-47 | 95.91059111 |
| CALHM2    | -0.713624994 | 2.535845738 | -16.0253893  | 6.84E-47 | 95.75270794 |
| GIMAP8    | -0.863308716 | 2.13716058  | -16.01883357 | 7.33E-47 | 95.68353241 |
| CLECL1    | -0.490363729 | 0.647578903 | -16.01821639 | 7.38E-47 | 95.67702044 |
| CD3G      | -0.810991988 | 1.337099814 | -16.00916929 | 8.13E-47 | 95.58157212 |
| TRAV12-3  | -0.686850558 | 0.792584467 | -16.00134869 | 8.83E-47 | 95.49907733 |
| CD74      | -1.432126798 | 9.885493956 | -15.98693281 | 1.03E-46 | 95.34704651 |
| P2RY10    | -0.877000606 | 1.345753202 | -15.98498161 | 1.05E-46 | 95.32647237 |
| IL2RB     | -1.089892756 | 2.458040849 | -15.96733357 | 1.27E-46 | 95.14042166 |
| GLIPR2    | -1.037164167 | 3.438155908 | -15.9478686  | 1.56E-46 | 94.93529247 |
| SERPING1  | -1.06665009  | 6.252609207 | -15.93591419 | 1.77E-46 | 94.80935224 |
| SLC9A9    | -0.686244757 | 1.523814351 | -15.91858241 | 2.12E-46 | 94.62681505 |
| IL2RA     | -1.036362509 | 1.839355643 | -15.91538226 | 2.19E-46 | 94.59311825 |
| F13A1     | -1.546920977 | 3.129977767 | -15.90996841 | 2.32E-46 | 94.53611673 |
| SELL      | -1.290283884 | 2.796498092 | -15.89733435 | 2.66E-46 | 94.4031193  |
| RTN1      | -0.670312673 | 0.989092368 | -15.89658075 | 2.68E-46 | 94.39518726 |
| TRBV19    | -0.829566955 | 1.183212925 | -15.88363544 | 3.07E-46 | 94.25895078 |

|          |              |             |              |          |             |
|----------|--------------|-------------|--------------|----------|-------------|
| BTN3A3   | -0.802814489 | 2.797534343 | -15.87459304 | 3.38E-46 | 94.16381    |
| RUNX3    | -0.955704591 | 2.311163457 | -15.85623658 | 4.10E-46 | 93.97072407 |
| TRBV5-1  | -0.745657202 | 1.021816443 | -15.85025168 | 4.37E-46 | 93.90778648 |
| TRAT1    | -0.66049985  | 0.800616327 | -15.83637617 | 5.06E-46 | 93.76190059 |
| CD5      | -1.008476887 | 1.970255233 | -15.83459463 | 5.16E-46 | 93.74317268 |
| CD69     | -1.115891086 | 2.040685774 | -15.82165279 | 5.91E-46 | 93.60714599 |
| FCGR2B   | -0.85177629  | 1.577401035 | -15.79565881 | 7.78E-46 | 93.33404366 |
| CD300LF  | -1.041167758 | 2.144269406 | -15.79174314 | 8.10E-46 | 93.2929169  |
| GVINP1   | -0.625292601 | 0.833150077 | -15.78318285 | 8.87E-46 | 93.20301909 |
| DCN      | -1.3339585   | 4.631157907 | -15.77358603 | 9.82E-46 | 93.1022549  |
| MAF      | -0.802756378 | 2.691667482 | -15.75164019 | 1.24E-45 | 92.87190543 |
| KBTBD8   | -0.448848096 | 0.749006382 | -15.74780486 | 1.29E-45 | 92.83165973 |
| RASSF2   | -0.931766394 | 2.697109811 | -15.73153203 | 1.53E-45 | 92.66093827 |
| CXCL12   | -1.141957057 | 2.586277554 | -15.72735341 | 1.60E-45 | 92.61710904 |
| DOCK10   | -0.762638793 | 1.635245268 | -15.72467501 | 1.64E-45 | 92.58901752 |
| FOXP3    | -0.779478267 | 1.61516866  | -15.71922143 | 1.74E-45 | 92.53182436 |
| C1R      | -1.000456031 | 5.55009798  | -15.71645408 | 1.79E-45 | 92.50280498 |
| EMP3     | -1.008156384 | 4.431008237 | -15.70965767 | 1.93E-45 | 92.43154272 |
| P2RY12   | -0.660529013 | 0.759927972 | -15.68210103 | 2.57E-45 | 92.14270918 |
| CD163    | -1.417120823 | 3.71675255  | -15.68039831 | 2.62E-45 | 92.1248678  |
| SIRPG    | -0.836384148 | 1.316816381 | -15.66240039 | 3.17E-45 | 91.9363223  |
| CCR8     | -0.505494345 | 0.659516018 | -15.65320838 | 3.49E-45 | 91.84005522 |
| IFFO1    | -0.724890646 | 1.619246814 | -15.64218323 | 3.92E-45 | 91.72461507 |
| TRG-AS1  | -0.459906571 | 0.643954614 | -15.63096414 | 4.41E-45 | 91.60717251 |
| B2M      | -0.940254681 | 9.523345242 | -15.60544372 | 5.77E-45 | 91.3401285  |
| TRBV7-9  | -0.925974782 | 1.391275367 | -15.60397518 | 5.86E-45 | 91.32476635 |
| TNFRSF1B | -0.899393852 | 4.072382493 | -15.5886428  | 6.88E-45 | 91.1644058  |
| ITGB7    | -0.689065551 | 1.284076736 | -15.5880282  | 6.93E-45 | 91.1579789  |
| PREX1    | -0.86993445  | 2.870744189 | -15.57268267 | 8.14E-45 | 90.99753684 |
| SIGLEC10 | -1.009402672 | 1.936329049 | -15.56657774 | 8.68E-45 | 90.93372296 |
| KLRB1    | -0.976097883 | 1.971878767 | -15.5572598  | 9.57E-45 | 90.83634064 |
| HLA-DRB1 | -1.522674077 | 8.952200386 | -15.53830257 | 1.17E-44 | 90.63827915 |
| JAK2     | -0.663855797 | 1.98083428  | -15.52066553 | 1.41E-44 | 90.45408538 |

|              |              |             |              |          |             |
|--------------|--------------|-------------|--------------|----------|-------------|
| UBASH3A      | -0.620180641 | 0.900174869 | -15.51737911 | 1.45E-44 | 90.41977138 |
| PMP22        | -0.949832032 | 4.528661885 | -15.50262397 | 1.70E-44 | 90.26574161 |
| GPR174       | -0.703126939 | 0.821232777 | -15.48330561 | 2.08E-44 | 90.06415283 |
| PLA2G5       | -0.481973519 | 0.817526839 | -15.47843611 | 2.19E-44 | 90.01335295 |
| ATP8B4       | -0.315922583 | 0.507197563 | -15.46276967 | 2.58E-44 | 89.84995417 |
| RP5-1091N2.9 | -0.51564781  | 0.776965621 | -15.46189495 | 2.60E-44 | 89.84083271 |
| C10orf54     | -0.789661621 | 3.333411302 | -15.4567869  | 2.75E-44 | 89.78756997 |
| GAL3ST4      | -0.836001283 | 2.094531295 | -15.39689353 | 5.14E-44 | 89.16350832 |
| ETS1         | -0.928697001 | 3.829411084 | -15.37927902 | 6.18E-44 | 88.98013503 |
| CD226        | -0.30413496  | 0.421665577 | -15.36300246 | 7.33E-44 | 88.81075627 |
| TRAV12-1     | -0.693742733 | 0.822900539 | -15.35872703 | 7.67E-44 | 88.76627536 |
| CTSS         | -1.0167106   | 5.836737619 | -15.3580762  | 7.72E-44 | 88.75950469 |
| CASS4        | -0.676066447 | 1.251520271 | -15.30890282 | 1.29E-43 | 88.24823646 |
| CCR4         | -0.867841141 | 1.231077687 | -15.28205893 | 1.71E-43 | 87.96938057 |
| HNRNPA1P21   | -0.706509779 | 1.256832921 | -15.248504   | 2.42E-43 | 87.62105693 |
| CD14         | -1.199599544 | 5.463765608 | -15.22700465 | 3.03E-43 | 87.39802369 |
| TBC1D10C     | -0.893342655 | 1.724453607 | -15.22697818 | 3.03E-43 | 87.39774912 |
| INPP5D       | -0.889207992 | 2.356505198 | -15.21235663 | 3.53E-43 | 87.24613096 |
| MATK         | -0.631054548 | 1.050909284 | -15.20614374 | 3.77E-43 | 87.18172235 |
| TRBV18       | -0.613460214 | 0.797135543 | -15.20482366 | 3.82E-43 | 87.16803842 |
| CNRIP1       | -0.604583675 | 1.537431234 | -15.19588082 | 4.20E-43 | 87.07534834 |
| NAALADL1     | -0.417117476 | 0.848588539 | -15.16340325 | 5.88E-43 | 86.73889416 |
| CARD16       | -0.837062319 | 2.345036563 | -15.15606372 | 6.35E-43 | 86.662896   |
| PIK3R6       | -0.580538038 | 1.050737013 | -15.14871386 | 6.86E-43 | 86.58680444 |
| TRGV7        | -0.471066756 | 0.621676566 | -15.14271295 | 7.30E-43 | 86.52468831 |
| RAB8B        | -0.717348621 | 2.826374278 | -15.1375405  | 7.70E-43 | 86.47115483 |
| ABCD2        | -0.286299458 | 0.323393065 | -15.07904983 | 1.41E-42 | 85.86626111 |
| FGD5         | -0.675426561 | 1.757998039 | -15.07825187 | 1.43E-42 | 85.85801481 |
| CD6          | -0.851640616 | 1.730636982 | -15.07742803 | 1.44E-42 | 85.84950123 |
| GAPT         | -0.575962008 | 0.829611677 | -15.06907647 | 1.57E-42 | 85.76320572 |
| AC083949.1   | -0.350885171 | 0.434135552 | -15.06681398 | 1.61E-42 | 85.73983086 |
| TRBV3-1      | -0.666620725 | 0.848846772 | -15.06259031 | 1.68E-42 | 85.69619747 |
| NRROS        | -0.745636402 | 1.919974886 | -15.04379518 | 2.04E-42 | 85.50208607 |

|               |              |             |              |          |             |
|---------------|--------------|-------------|--------------|----------|-------------|
| CCR7          | -1.055325313 | 1.859502443 | -15.04189386 | 2.08E-42 | 85.48245476 |
| C16orf54      | -0.929666785 | 1.720522485 | -15.00888915 | 2.93E-42 | 85.14182506 |
| RASGRP4       | -0.444731572 | 0.74843088  | -15.0070201  | 2.99E-42 | 85.1225436  |
| ITGAX         | -1.002007711 | 2.701909479 | -15.00622512 | 3.01E-42 | 85.11434273 |
| CD40          | -1.097944385 | 3.679475885 | -15.00458358 | 3.06E-42 | 85.09740944 |
| THEMIS        | -0.589125072 | 0.741910559 | -14.97482206 | 4.17E-42 | 84.79052467 |
| DPEP2         | -0.697478245 | 1.242948629 | -14.96406049 | 4.66E-42 | 84.67961351 |
| AGAP2         | -0.507847183 | 0.968976776 | -14.9606467  | 4.83E-42 | 84.64443651 |
| TNFAIP8       | -0.697423062 | 1.929392438 | -14.95581114 | 5.08E-42 | 84.59461428 |
| GPR183        | -1.174906964 | 3.38407604  | -14.93912274 | 6.04E-42 | 84.42271518 |
| NAPSB         | -1.181100085 | 2.883995757 | -14.93520186 | 6.29E-42 | 84.38233868 |
| TRAV29DV5     | -0.519730323 | 0.612551441 | -14.90767746 | 8.36E-42 | 84.09901008 |
| HK3           | -1.119266597 | 2.227658536 | -14.90688766 | 8.43E-42 | 84.09088307 |
| CXCR6         | -0.852273262 | 1.569876066 | -14.9065263  | 8.46E-42 | 84.08716475 |
| TRAV12-2      | -0.66827355  | 0.850102184 | -14.89915994 | 9.13E-42 | 84.01137334 |
| GBP4          | -1.197314123 | 3.119941043 | -14.89195891 | 9.84E-42 | 83.93729685 |
| ACAP1         | -0.831585165 | 1.73830656  | -14.87931187 | 1.12E-41 | 83.80723049 |
| RP11-23J18.1  | -0.437142186 | 0.773520683 | -14.83071085 | 1.85E-41 | 83.30779522 |
| BTLA          | -0.440908544 | 0.543908033 | -14.80852914 | 2.33E-41 | 83.08005948 |
| NCR3          | -0.640084365 | 0.825965727 | -14.80745857 | 2.35E-41 | 83.06907142 |
| GNAI2         | -0.581062014 | 5.362221102 | -14.79866351 | 2.58E-41 | 82.97881305 |
| CCL5          | -1.453437837 | 4.680742897 | -14.79239081 | 2.75E-41 | 82.91445266 |
| RP11-327F22.2 | -0.290811056 | 0.376413657 | -14.77565042 | 3.27E-41 | 82.74274147 |
| TRBV6-5       | -0.664343837 | 0.940966891 | -14.7728223  | 3.37E-41 | 82.71374004 |
| FAM26F        | -1.298127501 | 2.657399137 | -14.7724582  | 3.38E-41 | 82.71000652 |
| ADAP2         | -0.710455918 | 2.48216954  | -14.7637226  | 3.70E-41 | 82.62044032 |
| TOMM20P2      | -0.448683271 | 0.522835011 | -14.75916459 | 3.87E-41 | 82.5737151  |
| TRAV8-3       | -0.661395024 | 0.86931923  | -14.75867495 | 3.89E-41 | 82.56869604 |
| SLC2A9        | -0.370116558 | 0.725499507 | -14.75238296 | 4.15E-41 | 82.50420551 |
| GNGT2         | -0.58219799  | 1.229003601 | -14.74899306 | 4.30E-41 | 82.46946469 |
| AC079767.4    | -0.900163007 | 1.307171169 | -14.73762887 | 4.84E-41 | 82.35302351 |
| TLR1          | -0.684272561 | 1.703433048 | -14.73025967 | 5.22E-41 | 82.27753502 |
| MILR1         | -0.924260466 | 2.154361022 | -14.7166616  | 6.00E-41 | 82.13827799 |

|            |              |             |              |          |             |
|------------|--------------|-------------|--------------|----------|-------------|
| TMEM119    | -1.104424181 | 3.192799178 | -14.70524451 | 6.75E-41 | 82.02139515 |
| VIM        | -0.970699936 | 7.030459791 | -14.69200091 | 7.74E-41 | 81.88585773 |
| TRAV8-4    | -0.494927549 | 0.644963861 | -14.67305327 | 9.40E-41 | 81.69202768 |
| GIMAP5     | -0.373423985 | 0.468322003 | -14.67258236 | 9.45E-41 | 81.6872116  |
| DOK3       | -0.733062721 | 2.009959266 | -14.66711258 | 9.99E-41 | 81.63127598 |
| FPR1       | -1.062335937 | 2.368432294 | -14.6587555  | 1.09E-40 | 81.54582983 |
| CLEC7A     | -1.035568217 | 2.559131593 | -14.65825225 | 1.09E-40 | 81.54068499 |
| ABCA6      | -0.357713187 | 0.488124575 | -14.64423356 | 1.26E-40 | 81.39739733 |
| ARHGAP18   | -0.737274811 | 3.497788555 | -14.63006904 | 1.46E-40 | 81.25267414 |
| TRBV9      | -0.624825026 | 0.863029833 | -14.62446903 | 1.55E-40 | 81.1954725  |
| FAIM3      | -1.027692438 | 2.428048965 | -14.62446321 | 1.55E-40 | 81.19541308 |
| LINC01150  | -0.444385065 | 0.601446767 | -14.61230095 | 1.76E-40 | 81.07121076 |
| MAP4K1     | -0.881349937 | 2.010840166 | -14.59592388 | 2.08E-40 | 80.90403115 |
| CXCR4      | -1.058128386 | 5.122700263 | -14.59320822 | 2.13E-40 | 80.87631648 |
| AC147651.4 | -0.637545802 | 1.287682956 | -14.57690405 | 2.52E-40 | 80.70996755 |
| TRAV4      | -0.566243586 | 0.745866852 | -14.56975633 | 2.72E-40 | 80.63706378 |
| TRBV2      | -0.62512773  | 0.786609787 | -14.56269132 | 2.92E-40 | 80.56501782 |
| DSE        | -0.754911859 | 1.586296535 | -14.55998279 | 3.00E-40 | 80.53740099 |
| SLA2       | -0.682225727 | 1.311539639 | -14.55479286 | 3.17E-40 | 80.48448904 |
| CD300A     | -0.881125242 | 2.6339056   | -14.55165765 | 3.27E-40 | 80.45252893 |
| MFNG       | -0.739475421 | 2.601603428 | -14.54464564 | 3.51E-40 | 80.38105885 |
| NLRC3      | -0.629799351 | 1.18487352  | -14.5328829  | 3.96E-40 | 80.26119792 |
| HLA-E      | -0.826672414 | 8.104930155 | -14.51950329 | 4.54E-40 | 80.12490857 |
| SLC37A2    | -0.832963897 | 1.739396611 | -14.51027163 | 5.00E-40 | 80.03090121 |
| CPED1      | -0.65019178  | 1.122387807 | -14.4971502  | 5.71E-40 | 79.89732506 |
| SH3BGRL    | -0.685899948 | 5.45829995  | -14.49315456 | 5.95E-40 | 79.85665918 |
| CTLA4      | -0.818000203 | 1.442578603 | -14.49299283 | 5.96E-40 | 79.85501329 |
| LYZ        | -1.832281774 | 7.362967528 | -14.4881383  | 6.27E-40 | 79.80561222 |
| GPR84      | -0.782376629 | 1.215614868 | -14.48563179 | 6.43E-40 | 79.78010799 |
| MIR155HG   | -0.666663008 | 1.083584262 | -14.4815846  | 6.70E-40 | 79.73893066 |
| APOBEC3G   | -0.867507318 | 2.049391604 | -14.47155046 | 7.42E-40 | 79.63686047 |
| LILRA1     | -0.266842447 | 0.412753271 | -14.46985915 | 7.55E-40 | 79.61965875 |
| ANXA6      | -0.762083855 | 4.472843214 | -14.45462302 | 8.83E-40 | 79.46473462 |



|            |              |             |              |          |             |
|------------|--------------|-------------|--------------|----------|-------------|
| AC109826.1 | -0.250468092 | 0.407922771 | -14.44887506 | 9.36E-40 | 79.40630534 |
| CCL19      | -1.89235481  | 4.162984586 | -14.44455402 | 9.78E-40 | 79.36238728 |
| SP140      | -0.697206154 | 1.185768667 | -14.42436656 | 1.20E-39 | 79.15727729 |
| PPP1R16B   | -0.86819155  | 1.707786532 | -14.42275259 | 1.22E-39 | 79.14088395 |
| OLR1       | -1.353497789 | 3.136714948 | -14.41181889 | 1.37E-39 | 79.02984857 |
| SLC8A1     | -0.385362022 | 0.715677994 | -14.40455161 | 1.47E-39 | 78.95606594 |
| FCGR1B     | -0.313218248 | 0.429921284 | -14.39442105 | 1.63E-39 | 78.8532387  |
| C1S        | -1.09117461  | 5.62849899  | -14.39172957 | 1.68E-39 | 78.82592459 |
| TREM2      | -1.291676884 | 4.129758219 | -14.3867344  | 1.77E-39 | 78.77523732 |
| USP30-AS1  | -0.761194847 | 1.344785958 | -14.3835174  | 1.82E-39 | 78.7425975  |
| TRAV26-1   | -0.407443811 | 0.490365777 | -14.36093349 | 2.30E-39 | 78.51354417 |
| SIGLEC14   | -0.835846937 | 1.562596569 | -14.34875898 | 2.60E-39 | 78.39012777 |
| FTH1P22    | -0.639819557 | 0.865370303 | -14.34519879 | 2.70E-39 | 78.35404526 |
| NCF1C      | -0.757009532 | 1.452085699 | -14.33312929 | 3.05E-39 | 78.23174859 |
| SIGLEC1    | -1.030917155 | 2.104890531 | -14.33117153 | 3.11E-39 | 78.21191519 |
| EMILIN2    | -0.77942885  | 2.430787101 | -14.28846149 | 4.81E-39 | 77.77951365 |
| ATP6V1B2   | -0.546978676 | 3.949297044 | -14.26977599 | 5.81E-39 | 77.59050797 |
| CCL4       | -1.068268993 | 2.477735493 | -14.2268691  | 8.99E-39 | 77.15689156 |
| ZNF831     | -0.32411175  | 0.364056987 | -14.21696659 | 9.94E-39 | 77.05689458 |
| TRBV10-3   | -0.610362519 | 0.70030103  | -14.20668187 | 1.10E-38 | 76.95306905 |
| ADORA3     | -0.722564877 | 1.409411378 | -14.20434052 | 1.13E-38 | 76.92943724 |
| VAV1       | -0.84260062  | 2.633631412 | -14.19786538 | 1.21E-38 | 76.8640905  |
| GM2A       | -0.761127837 | 4.767667743 | -14.19389405 | 1.26E-38 | 76.8240184  |
| TRAV13-2   | -0.482458745 | 0.578241466 | -14.17586717 | 1.51E-38 | 76.64217995 |
| BHLHE41    | -1.019710491 | 2.453470155 | -14.17345826 | 1.55E-38 | 76.61788852 |
| KCTD12     | -1.000144609 | 4.138887419 | -14.17256215 | 1.56E-38 | 76.60885261 |
| MYLK       | -0.862149654 | 2.317742043 | -14.15885943 | 1.79E-38 | 76.4707112  |
| AXL        | -0.965277029 | 3.411580545 | -14.14808681 | 2.00E-38 | 76.3621488  |
| LILRA4     | -0.47080377  | 0.530104051 | -14.13894389 | 2.19E-38 | 76.27003743 |
| RASGRP3    | -0.452055697 | 1.290866092 | -14.12650028 | 2.49E-38 | 76.14471343 |
| CD40LG     | -0.64521685  | 0.929565569 | -14.11632583 | 2.76E-38 | 76.04227785 |
| CTSK       | -1.253034653 | 4.980635181 | -14.10476013 | 3.10E-38 | 75.92587335 |
| CIITA      | -0.939578331 | 2.093208593 | -14.08347299 | 3.85E-38 | 75.71173273 |

|              |              |             |              |          |             |
|--------------|--------------|-------------|--------------|----------|-------------|
| HLA-B        | -1.093733789 | 9.324387845 | -14.05668536 | 5.04E-38 | 75.44245585 |
| C1orf54      | -0.649786282 | 2.62951485  | -14.05490571 | 5.13E-38 | 75.42457406 |
| RP5-899E9.1  | -0.394727399 | 0.602037858 | -14.03025467 | 6.59E-38 | 75.17698285 |
| CR1          | -0.448658434 | 0.602895795 | -14.01509234 | 7.67E-38 | 75.02478772 |
| CD209        | -0.82341505  | 1.470427797 | -14.01435269 | 7.73E-38 | 75.01736521 |
| PPM1M        | -0.598456774 | 3.10255067  | -13.99840183 | 9.08E-38 | 74.85733538 |
| HAPLN3       | -0.920273457 | 2.50203586  | -13.98176068 | 1.07E-37 | 74.6904642  |
| GBP5         | -1.160966845 | 2.075743812 | -13.97887147 | 1.11E-37 | 74.66150104 |
| RP3-477O4.14 | -0.267927467 | 0.443076127 | -13.95597606 | 1.39E-37 | 74.43207586 |
| ABI3BP       | -0.921173409 | 1.590297089 | -13.94652733 | 1.53E-37 | 74.33744175 |
| ANKRD44      | -0.627650822 | 1.489928906 | -13.94249705 | 1.60E-37 | 74.29708491 |
| STAC3        | -0.573712455 | 1.625759666 | -13.93568079 | 1.71E-37 | 74.22884241 |
| STARD8       | -0.574597875 | 1.512291036 | -13.91406648 | 2.12E-37 | 74.01254225 |
| CSF2RA       | -0.925795204 | 2.310124064 | -13.89783196 | 2.50E-37 | 73.85017568 |
| PTGIR        | -0.520256958 | 1.238138965 | -13.88059665 | 2.97E-37 | 73.67789094 |
| TRBV12-4     | -0.547689622 | 0.645801433 | -13.86886592 | 3.35E-37 | 73.56068389 |
| CD27         | -1.159153053 | 2.707620854 | -13.86308281 | 3.55E-37 | 73.50291824 |
| LUM          | -1.245806148 | 7.177430815 | -13.84416012 | 4.29E-37 | 73.31397979 |
| TRBV5-4      | -0.551920955 | 0.635367331 | -13.84223592 | 4.37E-37 | 73.29477344 |
| TRAV17       | -0.514606608 | 0.660680211 | -13.81161687 | 5.95E-37 | 72.98931021 |
| TMEM200A     | -0.664403245 | 1.279190652 | -13.80333394 | 6.46E-37 | 72.90672911 |
| RP11-8L8.2   | -0.254765124 | 0.35113823  | -13.80192673 | 6.55E-37 | 72.8927014  |
| TRBV29-1     | -0.836577657 | 1.204187372 | -13.79291042 | 7.17E-37 | 72.80283756 |
| RP11-219E7.1 | -0.570721608 | 0.991261932 | -13.78683521 | 7.62E-37 | 72.74230189 |
| PIK3CD       | -0.736995604 | 2.530982537 | -13.77868087 | 8.27E-37 | 72.66106756 |
| BTN3A1       | -0.741181594 | 3.413245247 | -13.76655897 | 9.34E-37 | 72.54034767 |
| TIFAB        | -0.252643787 | 0.25893155  | -13.75857906 | 1.01E-36 | 72.46090293 |
| HLA-DOB      | -0.998386313 | 2.26202454  | -13.75092181 | 1.09E-36 | 72.38468986 |
| C5AR1        | -0.958444577 | 3.059396485 | -13.72200379 | 1.46E-36 | 72.09703837 |
| ZEB1         | -0.601752281 | 1.768369603 | -13.7094752  | 1.65E-36 | 71.97249914 |
| SLAMF7       | -1.234492907 | 3.056585333 | -13.70722379 | 1.69E-36 | 71.95012461 |
| DOCK11       | -0.763086426 | 2.09362601  | -13.7034739  | 1.76E-36 | 71.91286183 |
| LILRB3       | -0.513386967 | 1.10816207  | -13.69650021 | 1.88E-36 | 71.84357638 |

|            |              |             |              |          |             |
|------------|--------------|-------------|--------------|----------|-------------|
| DNAJC5B    | -0.56814885  | 0.844929108 | -13.67297492 | 2.38E-36 | 71.6099635  |
| TRAF1      | -0.721563232 | 2.108420017 | -13.67141889 | 2.42E-36 | 71.59451802 |
| TM6SF1     | -0.582041297 | 1.221958733 | -13.67008912 | 2.45E-36 | 71.58131909 |
| P2RY8      | -0.730759381 | 1.502837881 | -13.66892994 | 2.48E-36 | 71.56981389 |
| CCDC80     | -1.154074701 | 3.196667928 | -13.66836502 | 2.49E-36 | 71.56420705 |
| KCNAB2     | -0.713933756 | 2.178965719 | -13.66762648 | 2.51E-36 | 71.55687721 |
| AC011899.9 | -0.390470619 | 0.622351355 | -13.61930133 | 4.07E-36 | 71.07764963 |
| CYSLTR2    | -0.323306331 | 0.476386601 | -13.61165393 | 4.39E-36 | 71.00188305 |
| IL411      | -1.170407531 | 2.681934739 | -13.59744762 | 5.06E-36 | 70.86118556 |
| SRGN       | -1.146759364 | 6.603271174 | -13.59677512 | 5.09E-36 | 70.85452679 |
| P2RY14     | -0.562800564 | 1.127173161 | -13.57482046 | 6.34E-36 | 70.63722737 |
| TRBV6-1    | -0.579318585 | 0.745440573 | -13.57151311 | 6.55E-36 | 70.60450634 |
| SSPN       | -0.745596236 | 1.649800402 | -13.55886104 | 7.43E-36 | 70.47936759 |
| EBI3       | -0.756367681 | 1.550587873 | -13.55372844 | 7.82E-36 | 70.42861738 |
| SLFN12L    | -0.382766307 | 0.59217501  | -13.55193096 | 7.96E-36 | 70.41084637 |
| LINC00426  | -0.387157602 | 0.572848998 | -13.54198715 | 8.79E-36 | 70.31255495 |
| LINC00996  | -0.429464144 | 0.576708484 | -13.50033523 | 1.33E-35 | 69.90119968 |
| IL9R       | -0.255827391 | 0.309055464 | -13.4963585  | 1.38E-35 | 69.86195594 |
| TRBV6-6    | -0.515337558 | 0.601899403 | -13.49054562 | 1.46E-35 | 69.80460209 |
| AD000864.6 | -0.237307552 | 0.433298421 | -13.48673592 | 1.52E-35 | 69.76701924 |
| HLA-DRB5   | -1.652840311 | 7.304510556 | -13.46412275 | 1.90E-35 | 69.54404014 |
| KCNMB1     | -0.455629167 | 0.838887712 | -13.45086811 | 2.17E-35 | 69.41342227 |
| CD8A       | -1.095088759 | 2.272802179 | -13.43699249 | 2.49E-35 | 69.276749   |
| CRYBB1     | -0.342529974 | 0.633349117 | -13.42788683 | 2.73E-35 | 69.187095   |
| LACTB      | -0.471190366 | 2.729886669 | -13.41901569 | 2.98E-35 | 69.09977729 |
| TRAV16     | -0.489744056 | 0.602591357 | -13.41008429 | 3.25E-35 | 69.01189362 |
| MMP2       | -1.227732763 | 5.836764961 | -13.40661915 | 3.37E-35 | 68.97780456 |
| FAS        | -0.90924034  | 2.767109777 | -13.40517153 | 3.41E-35 | 68.96356441 |
| CD72       | -0.637837439 | 1.444251845 | -13.39085969 | 3.93E-35 | 68.8228192  |
| FMO2       | -1.062623628 | 2.274416685 | -13.38486334 | 4.17E-35 | 68.7638709  |
| PLEKHO1    | -0.757732441 | 3.003707542 | -13.38448323 | 4.19E-35 | 68.76013459 |
| LTB        | -1.229539327 | 3.342287313 | -13.35767255 | 5.46E-35 | 68.49672188 |
| FCGR1C     | -0.45219628  | 0.644192903 | -13.35621045 | 5.54E-35 | 68.482364   |

|                |              |             |              |          |             |
|----------------|--------------|-------------|--------------|----------|-------------|
| CCL13          | -1.557870456 | 3.340174883 | -13.34593825 | 6.13E-35 | 68.3815114  |
| TMEM150B       | -0.736500717 | 1.388761306 | -13.32759818 | 7.35E-35 | 68.20153929 |
| LMO2           | -0.622427385 | 2.144242099 | -13.32713984 | 7.38E-35 | 68.19704314 |
| FUT7           | -0.360639619 | 0.483117334 | -13.32340834 | 7.66E-35 | 68.16044062 |
| TRAV5          | -0.423029077 | 0.475000768 | -13.32005486 | 7.92E-35 | 68.12755024 |
| LYL1           | -0.547079894 | 1.49399508  | -13.31552455 | 8.28E-35 | 68.08312387 |
| CD1D           | -0.577163126 | 1.278189111 | -13.31142517 | 8.62E-35 | 68.04292958 |
| CD101          | -0.501404201 | 0.967424468 | -13.28012483 | 1.17E-34 | 67.73622406 |
| GPNMB          | -1.266303892 | 5.24057216  | -13.26919457 | 1.31E-34 | 67.62920138 |
| TRBV4-2        | -0.622985383 | 0.748293861 | -13.25519432 | 1.50E-34 | 67.49218035 |
| LIPA           | -0.891055027 | 4.818319749 | -13.23980465 | 1.75E-34 | 67.34164039 |
| GRAP2          | -0.475060452 | 0.796549962 | -13.23319873 | 1.86E-34 | 67.27704766 |
| FAM49A         | -0.702151406 | 1.953273137 | -13.2242785  | 2.03E-34 | 67.18985006 |
| FCN1           | -0.912767525 | 1.568618522 | -13.20859031 | 2.37E-34 | 67.036562   |
| EOMES          | -0.558016531 | 0.714868435 | -13.20471272 | 2.47E-34 | 66.99868772 |
| COLEC12        | -1.092480233 | 2.468204032 | -13.1841242  | 3.02E-34 | 66.79767945 |
| LINC00861      | -0.469628854 | 0.555389222 | -13.17968745 | 3.15E-34 | 66.75438266 |
| ZAP70          | -0.820703865 | 1.430040277 | -13.16406957 | 3.68E-34 | 66.60202845 |
| CXCR3          | -0.936467692 | 1.960717153 | -13.15672731 | 3.95E-34 | 66.53043389 |
| MFSD1          | -0.517838443 | 4.024204263 | -13.14469357 | 4.45E-34 | 66.41313434 |
| GBP1           | -1.188237691 | 3.738035524 | -13.1116169  | 6.15E-34 | 66.09098458 |
| STAP1          | -0.629543086 | 0.933603642 | -13.10491026 | 6.56E-34 | 66.02571326 |
| FLT3           | -0.271648834 | 0.376385761 | -13.10162213 | 6.78E-34 | 65.99371794 |
| SIGLEC22P      | -0.210522613 | 0.245647652 | -13.06815051 | 9.41E-34 | 65.66824284 |
| CD96           | -0.825682897 | 1.52934832  | -13.06584474 | 9.62E-34 | 65.64583662 |
| GPR18          | -0.457193547 | 0.619602158 | -13.05651141 | 1.05E-33 | 65.55516018 |
| IL15RA         | -0.717959975 | 2.67718874  | -13.05633759 | 1.06E-33 | 65.55347171 |
| SUSD3          | -0.782010707 | 2.251203206 | -13.04494714 | 1.18E-33 | 65.44285316 |
| LILRA6         | -0.535599931 | 0.906116697 | -13.04246723 | 1.21E-33 | 65.41877578 |
| BHLHE22        | -0.453945728 | 0.786607883 | -13.03178442 | 1.34E-33 | 65.31508191 |
| CLEC2B         | -0.905695901 | 2.559212757 | -13.01913668 | 1.52E-33 | 65.19236909 |
| TRGV3          | -0.311333926 | 0.368249314 | -13.01804962 | 1.53E-33 | 65.18182476 |
| RP11-1094M14.8 | -0.673971584 | 1.169116485 | -13.00211227 | 1.79E-33 | 65.02728443 |

|                |              |             |              |          |             |
|----------------|--------------|-------------|--------------|----------|-------------|
| CTSB           | -0.760585496 | 7.513893539 | -13.00196623 | 1.80E-33 | 65.02586869 |
| THEMIS2        | -0.789629936 | 3.378037229 | -12.99305809 | 1.96E-33 | 64.93952971 |
| SCML4          | -0.313079924 | 0.362306792 | -12.98226574 | 2.18E-33 | 64.83496768 |
| AC133644.2     | -0.415234646 | 0.70388015  | -12.98005475 | 2.22E-33 | 64.81355176 |
| TRBV7-3        | -0.484635311 | 0.619091944 | -12.97070555 | 2.44E-33 | 64.72301381 |
| CST7           | -1.106434986 | 3.338441877 | -12.96577655 | 2.56E-33 | 64.67529425 |
| TRIM22         | -0.923488592 | 3.660046725 | -12.93829274 | 3.34E-33 | 64.40937657 |
| PTGDS          | -1.440497363 | 4.308300751 | -12.93440639 | 3.47E-33 | 64.37179696 |
| SAMD9L         | -0.967441241 | 2.669575269 | -12.92891553 | 3.66E-33 | 64.31871181 |
| TRAV23DV6      | -0.41456804  | 0.463856812 | -12.91754492 | 4.09E-33 | 64.20881729 |
| RP11-1094M14.5 | -0.491200262 | 0.690666201 | -12.91283734 | 4.28E-33 | 64.16333363 |
| FMNL1          | -0.744966579 | 2.882376854 | -12.90862574 | 4.46E-33 | 64.1226489  |
| TNFAIP3        | -0.906113031 | 3.491557609 | -12.89657387 | 5.01E-33 | 64.00626248 |
| CD244          | -0.463959778 | 0.732931408 | -12.89520446 | 5.08E-33 | 63.99304126 |
| PLCG2          | -0.574549736 | 1.52943419  | -12.89192643 | 5.24E-33 | 63.961396   |
| RP11-47L3.1    | -0.551197449 | 0.940476408 | -12.88523844 | 5.60E-33 | 63.89684403 |
| TRBV7-6        | -0.510856981 | 0.52295006  | -12.88304796 | 5.72E-33 | 63.87570537 |
| PTCRA          | -0.370468324 | 0.459066678 | -12.88080753 | 5.84E-33 | 63.85408652 |
| KLRG1          | -0.350393672 | 0.676017471 | -12.87671588 | 6.08E-33 | 63.81460925 |
| PECAM1         | -0.722218852 | 4.50638995  | -12.87148895 | 6.39E-33 | 63.76418761 |
| IL18BP         | -0.733037297 | 2.617637771 | -12.85698363 | 7.36E-33 | 63.62431531 |
| TRBV11-2       | -0.496987786 | 0.665528652 | -12.84884927 | 7.97E-33 | 63.54591156 |
| DPT            | -1.318292619 | 3.348570467 | -12.84625389 | 8.17E-33 | 63.52090098 |
| CD83           | -0.878717618 | 3.388256533 | -12.82545591 | 9.99E-33 | 63.32057086 |
| PRF1           | -1.036538656 | 2.57568626  | -12.80156073 | 1.26E-32 | 63.09060887 |
| GZMA           | -1.25852881  | 3.298096694 | -12.78490696 | 1.48E-32 | 62.93046406 |
| NPL            | -0.785311903 | 2.560496688 | -12.78074957 | 1.54E-32 | 62.8905024  |
| SIRPB1         | -0.53395804  | 0.78424022  | -12.77778552 | 1.59E-32 | 62.86201538 |
| 1-Sep          | -0.750379716 | 1.929700738 | -12.7731734  | 1.66E-32 | 62.81769564 |
| RIN3           | -0.585045698 | 2.285707189 | -12.76483186 | 1.80E-32 | 62.73755885 |
| LHFPL2         | -0.743018475 | 3.006853836 | -12.75681096 | 1.94E-32 | 62.66052738 |
| RP11-399O19.9  | -0.376593215 | 0.758168605 | -12.75103368 | 2.05E-32 | 62.60505844 |
| CD200          | -0.636612489 | 1.97203862  | -12.746976   | 2.14E-32 | 62.56610731 |

|               |              |             |              |          |             |
|---------------|--------------|-------------|--------------|----------|-------------|
| CD79B         | -1.028278706 | 1.987110535 | -12.74465679 | 2.18E-32 | 62.54384729 |
| LPAR6         | -0.63996557  | 2.29741072  | -12.73079814 | 2.50E-32 | 62.41087275 |
| RCBTB2        | -0.52507249  | 2.088619797 | -12.71982381 | 2.78E-32 | 62.30562546 |
| TRAV20        | -0.344875655 | 0.401298535 | -12.71633003 | 2.87E-32 | 62.27212868 |
| CPVL          | -1.083391788 | 3.267874152 | -12.71204527 | 2.99E-32 | 62.23105479 |
| TRAV8-1       | -0.33878394  | 0.367889485 | -12.71099939 | 3.02E-32 | 62.22102994 |
| RP11-652L8.4  | -0.228169235 | 0.329444452 | -12.70957935 | 3.06E-32 | 62.20741948 |
| HS3ST3B1      | -0.503394384 | 0.948996469 | -12.70901363 | 3.08E-32 | 62.20199746 |
| JAK3          | -0.714692343 | 2.308006333 | -12.70891755 | 3.08E-32 | 62.20107668 |
| DAPP1         | -0.801504471 | 2.198428959 | -12.70523857 | 3.20E-32 | 62.16581975 |
| CYLD          | -0.481728883 | 2.323691986 | -12.69345227 | 3.58E-32 | 62.05290257 |
| TNFRSF9       | -0.648985721 | 1.004846269 | -12.69110346 | 3.66E-32 | 62.03040651 |
| AP1S2         | -0.65497433  | 2.233261978 | -12.69088177 | 3.67E-32 | 62.02828334 |
| TMEM140       | -0.549995901 | 3.526589513 | -12.68737176 | 3.80E-32 | 61.99466989 |
| DDR2          | -0.720885258 | 1.779483779 | -12.68045077 | 4.06E-32 | 61.92840521 |
| RP5-1028K7.2  | -0.638665432 | 0.966747588 | -12.67965006 | 4.09E-32 | 61.92074009 |
| NKG7          | -1.227727246 | 3.274053155 | -12.66746612 | 4.60E-32 | 61.80413413 |
| ACP5          | -0.923042243 | 5.13226363  | -12.66669116 | 4.63E-32 | 61.79671938 |
| HLA-DMA       | -1.073139275 | 5.809023614 | -12.66473281 | 4.72E-32 | 61.77798294 |
| PDCD1         | -0.792210782 | 1.376714484 | -12.65546585 | 5.16E-32 | 61.68934199 |
| MSC           | -0.858382169 | 2.024866876 | -12.65119323 | 5.38E-32 | 61.64848437 |
| PSMB8-AS1     | -0.722215776 | 2.829697661 | -12.64083622 | 5.94E-32 | 61.54947304 |
| HLA-DQB1      | -1.408265787 | 5.605688092 | -12.63963185 | 6.01E-32 | 61.53796222 |
| RHOG          | -0.460410607 | 5.016551191 | -12.62651489 | 6.82E-32 | 61.412632   |
| EGR2          | -0.840225334 | 2.101533492 | -12.6254124  | 6.89E-32 | 61.40210088 |
| LLNLR-470E3.1 | -0.60155777  | 1.028282232 | -12.62136404 | 7.17E-32 | 61.36343473 |
| FGD3          | -0.640811161 | 1.787788586 | -12.62053923 | 7.23E-32 | 61.35555769 |
| BZRAP1-AS1    | -0.21431794  | 0.372008574 | -12.6199943  | 7.26E-32 | 61.35035371 |
| PEA15         | -0.534122147 | 6.090645226 | -12.61692754 | 7.48E-32 | 61.32106874 |
| SOWAHD        | -0.46414573  | 0.958640136 | -12.60743954 | 8.20E-32 | 61.23048956 |
| PLA2G2D       | -1.264679337 | 1.753969754 | -12.57503422 | 1.12E-31 | 60.92138956 |
| TRBJ2-1       | -0.884956541 | 1.180048863 | -12.56359021 | 1.25E-31 | 60.81232827 |
| ISLR          | -1.146261897 | 4.552588137 | -12.5551479  | 1.35E-31 | 60.7319059  |

|                |              |             |              |          |             |
|----------------|--------------|-------------|--------------|----------|-------------|
| APOL4          | -0.798037493 | 2.009951004 | -12.55022799 | 1.42E-31 | 60.68505124 |
| TRAV6          | -0.301669007 | 0.342809448 | -12.54321966 | 1.52E-31 | 60.61832399 |
| CCND2          | -0.830029214 | 2.553175273 | -12.54209604 | 1.53E-31 | 60.6076276  |
| CECR1          | -0.946588929 | 3.88682771  | -12.5389558  | 1.58E-31 | 60.57773663 |
| LY9            | -0.418297049 | 0.667932993 | -12.53584746 | 1.63E-31 | 60.54815303 |
| SERPINB9       | -0.778000415 | 2.849660287 | -12.53523314 | 1.64E-31 | 60.54230676 |
| GBP2           | -0.875134881 | 3.905435331 | -12.52721015 | 1.77E-31 | 60.46596764 |
| RP11-848P1.3   | -0.616011188 | 1.783851244 | -12.52612361 | 1.79E-31 | 60.45563109 |
| PTGDR          | -0.234526799 | 0.299556762 | -12.50701974 | 2.15E-31 | 60.2739672  |
| NFATC2         | -0.599769478 | 1.850944076 | -12.50455359 | 2.20E-31 | 60.25052638 |
| CLEC12A        | -0.72588285  | 1.098120351 | -12.49924399 | 2.31E-31 | 60.20006672 |
| LINC01272      | -0.857587745 | 2.19435457  | -12.492883   | 2.46E-31 | 60.13962984 |
| RP11-693N9.2   | -0.44278118  | 0.863332391 | -12.48786117 | 2.58E-31 | 60.09192789 |
| AC006129.2     | -0.60368742  | 0.968874164 | -12.47959649 | 2.79E-31 | 60.01344407 |
| AKNA           | -0.645980763 | 2.55874273  | -12.46164876 | 3.31E-31 | 59.8431007  |
| CHST11         | -0.782337502 | 2.755129884 | -12.46154908 | 3.32E-31 | 59.84215497 |
| RASSF4         | -0.752062229 | 2.839587778 | -12.45957294 | 3.38E-31 | 59.82340715 |
| MPP1           | -0.708893583 | 2.43103007  | -12.44868062 | 3.75E-31 | 59.7200986  |
| ECM2           | -0.662157453 | 1.601312115 | -12.4062627  | 5.62E-31 | 59.31823594 |
| NECAP2         | -0.423195113 | 4.010488518 | -12.39942975 | 6.00E-31 | 59.25356874 |
| PRAM1          | -0.62638149  | 1.20881372  | -12.39750447 | 6.11E-31 | 59.23535115 |
| RASGRP2        | -0.625901039 | 1.056730027 | -12.38310379 | 7.01E-31 | 59.09913521 |
| IL10           | -0.377675027 | 0.573024217 | -12.34309785 | 1.03E-30 | 58.72115778 |
| SYNE3          | -0.331417958 | 0.589839335 | -12.33227343 | 1.14E-30 | 58.61899955 |
| FGF7           | -0.697947718 | 1.312555568 | -12.32277233 | 1.24E-30 | 58.52936964 |
| CXCL9          | -1.77641474  | 4.258533023 | -12.31607378 | 1.33E-30 | 58.46619988 |
| TRBV5-6        | -0.53243665  | 0.675819988 | -12.31004737 | 1.40E-30 | 58.4093843  |
| ARID5A         | -0.595289325 | 2.999509983 | -12.30333572 | 1.50E-30 | 58.34612591 |
| RAB33A         | -0.439522038 | 0.880747384 | -12.29206512 | 1.67E-30 | 58.23993976 |
| FNBP1          | -0.610164219 | 3.12484561  | -12.28974435 | 1.70E-30 | 58.2180811  |
| RP11-1334A24.6 | -0.482053603 | 1.081709451 | -12.26755795 | 2.10E-30 | 58.00922411 |
| GZMH           | -1.057991611 | 2.205950387 | -12.26704825 | 2.11E-30 | 58.00442835 |
| MCOLN2         | -0.620258203 | 1.299045176 | -12.2625341  | 2.20E-30 | 57.96195892 |

|               |              |             |              |          |             |
|---------------|--------------|-------------|--------------|----------|-------------|
| CD44          | -0.909510436 | 4.888571349 | -12.24343715 | 2.64E-30 | 57.78238598 |
| TSHZ3         | -0.531791412 | 1.149883304 | -12.24307507 | 2.65E-30 | 57.77898261 |
| C19orf35      | -0.218962779 | 0.376604796 | -12.24163641 | 2.69E-30 | 57.76546089 |
| STAT4         | -0.558769901 | 1.449383726 | -12.22510342 | 3.14E-30 | 57.61013065 |
| PLA2G4C       | -0.477893708 | 1.001082376 | -12.21953178 | 3.31E-30 | 57.55780954 |
| RECK          | -0.495693766 | 1.411687882 | -12.21077651 | 3.60E-30 | 57.47561793 |
| SNX10         | -0.868707085 | 3.105458379 | -12.2088465  | 3.66E-30 | 57.45750395 |
| PDGFRA        | -0.824300841 | 2.234431406 | -12.20840755 | 3.68E-30 | 57.45338439 |
| COTL1         | -0.841786386 | 4.465010764 | -12.18432004 | 4.62E-30 | 57.22744591 |
| MOXD1         | -0.967302896 | 2.943556712 | -12.17781533 | 4.91E-30 | 57.16647357 |
| ZCCHC24       | -0.599805714 | 2.689137765 | -12.17321592 | 5.13E-30 | 57.12337129 |
| BTN3A2        | -0.742294749 | 3.228007482 | -12.17297744 | 5.14E-30 | 57.12113666 |
| LINC00892     | -0.29357761  | 0.370527414 | -12.15991823 | 5.81E-30 | 56.99880453 |
| CXCL10        | -1.574665255 | 4.235459288 | -12.15887893 | 5.87E-30 | 56.9890719  |
| HLA-C         | -0.848757398 | 8.957578914 | -12.15282217 | 6.21E-30 | 56.93236189 |
| GPSM3         | -0.806419037 | 4.424164298 | -12.14621225 | 6.61E-30 | 56.87049004 |
| LAP3          | -0.60071082  | 5.028320141 | -12.12671389 | 7.95E-30 | 56.68808256 |
| TRBV14        | -0.360520462 | 0.41991146  | -12.12564345 | 8.03E-30 | 56.67807323 |
| RP4-742C19.12 | -0.32422412  | 0.37718133  | -12.12557984 | 8.03E-30 | 56.67747842 |
| TRAV39        | -0.395551885 | 0.518614019 | -12.10624519 | 9.64E-30 | 56.49676857 |
| COL6A3        | -1.109270299 | 4.913807872 | -12.10572952 | 9.68E-30 | 56.49195103 |
| TNFSF12       | -0.611862098 | 3.825144055 | -12.10154702 | 1.01E-29 | 56.45288112 |
| TRAV14DV4     | -0.450080573 | 0.546822163 | -12.08975049 | 1.13E-29 | 56.34272586 |
| TRAV19        | -0.555013363 | 0.827088236 | -12.08624622 | 1.16E-29 | 56.31001455 |
| LILRB5        | -0.589810653 | 0.928164785 | -12.08347621 | 1.19E-29 | 56.28416091 |
| ADAM19        | -0.784386382 | 2.166546193 | -12.08014519 | 1.23E-29 | 56.25307546 |
| TCF4          | -0.556513397 | 1.600524335 | -12.07920004 | 1.24E-29 | 56.24425603 |
| FEZ1          | -0.461042746 | 1.082841981 | -12.07880545 | 1.25E-29 | 56.2405741  |
| TRGV10        | -0.531155452 | 0.704731936 | -12.06738896 | 1.39E-29 | 56.13407601 |
| GPR68         | -0.886474481 | 2.275439708 | -12.06673176 | 1.40E-29 | 56.12794698 |
| LAX1          | -0.811244251 | 1.368688843 | -12.06370928 | 1.44E-29 | 56.09976198 |
| RRN3P2        | -0.276230512 | 0.518175047 | -12.06270764 | 1.45E-29 | 56.09042242 |
| TRAV35        | -0.302180072 | 0.325385312 | -12.05132029 | 1.61E-29 | 55.98427329 |



|              |              |             |              |          |             |
|--------------|--------------|-------------|--------------|----------|-------------|
| ARHGDIB      | -0.81459798  | 6.705078262 | -12.04079515 | 1.78E-29 | 55.8862101  |
| MFAP4        | -1.388652821 | 4.82522627  | -12.03640671 | 1.86E-29 | 55.84533674 |
| TRAV41       | -0.435453166 | 0.600790519 | -12.03190002 | 1.94E-29 | 55.80337041 |
| TIMP2        | -0.900946013 | 5.625767527 | -12.02465155 | 2.07E-29 | 55.73589069 |
| PRKG1        | -0.511681087 | 1.194171622 | -12.02306134 | 2.11E-29 | 55.72108958 |
| HPGDS        | -0.82145162  | 1.388019338 | -12.02230013 | 2.12E-29 | 55.71400491 |
| SVEP1        | -0.719141699 | 1.196197989 | -12.02022509 | 2.16E-29 | 55.69469348 |
| PLA2G7       | -0.934600734 | 2.914206592 | -12.01870076 | 2.19E-29 | 55.68050836 |
| CAMK4        | -0.26353709  | 0.403298082 | -12.00301359 | 2.54E-29 | 55.53458441 |
| RP11-18H21.1 | -0.21734096  | 0.274868922 | -12.00042317 | 2.60E-29 | 55.51049813 |
| MSRB3        | -0.736160267 | 2.160194719 | -11.98527143 | 3.00E-29 | 55.36967093 |
| JAZF1        | -0.510394871 | 2.030026765 | -11.94534659 | 4.36E-29 | 54.99906076 |
| PRRX1        | -0.852800309 | 2.448294079 | -11.93628473 | 4.74E-29 | 54.9150373  |
| PPP1R18      | -0.749223439 | 4.105612199 | -11.92087677 | 5.48E-29 | 54.77225255 |
| CCL18        | -1.571572634 | 5.459882551 | -11.90644741 | 6.26E-29 | 54.63862902 |
| TRBJ2-7      | -0.943090242 | 1.438552233 | -11.9009098  | 6.60E-29 | 54.58737167 |
| STAB1        | -0.793927771 | 2.796636265 | -11.88893261 | 7.38E-29 | 54.47655348 |
| ITM2A        | -0.879783717 | 3.064521983 | -11.88669648 | 7.53E-29 | 54.45587068 |
| ASB2         | -0.426690509 | 0.713273823 | -11.88259112 | 7.82E-29 | 54.41790424 |
| EMILIN1      | -0.980759227 | 4.335561078 | -11.87390239 | 8.48E-29 | 54.33757497 |
| RPL7AP64     | -0.361122754 | 0.562642731 | -11.87279436 | 8.57E-29 | 54.32733339 |
| TRGV5        | -0.263264173 | 0.321400776 | -11.86576868 | 9.15E-29 | 54.26240665 |
| IL3RA        | -0.625134033 | 2.780160521 | -11.86424162 | 9.28E-29 | 54.24829734 |
| TRAV22       | -0.336587744 | 0.383176414 | -11.8590298  | 9.74E-29 | 54.20015047 |
| CD22         | -0.758122828 | 1.185121365 | -11.85793344 | 9.84E-29 | 54.19002369 |
| DCSTAMP      | -0.526736728 | 0.649409495 | -11.85604902 | 1.00E-28 | 54.1726192  |
| SH2D3C       | -0.594616997 | 2.179678398 | -11.83826963 | 1.18E-28 | 54.00848461 |
| WNT2         | -0.837529825 | 1.792277702 | -11.82454734 | 1.34E-28 | 53.8818982  |
| CCL3         | -0.936302818 | 2.436925614 | -11.82264223 | 1.37E-28 | 53.86433026 |
| CEACAM21     | -0.6052223   | 1.200792507 | -11.81909579 | 1.41E-28 | 53.83163111 |
| MARCO        | -1.641648877 | 3.978830018 | -11.81642953 | 1.45E-28 | 53.80705107 |
| PRDM1        | -0.712482345 | 2.419723287 | -11.8126799  | 1.50E-28 | 53.77248876 |
| FCRL3        | -0.536097349 | 0.610036272 | -11.80445232 | 1.62E-28 | 53.69667237 |

|                |              |             |              |          |             |
|----------------|--------------|-------------|--------------|----------|-------------|
| TRANK1         | -0.606447814 | 2.17844701  | -11.79126105 | 1.83E-28 | 53.57517803 |
| NOD2           | -0.424274511 | 1.153233746 | -11.78638132 | 1.91E-28 | 53.53025395 |
| RASGEF1B       | -0.481171593 | 1.591528888 | -11.78606442 | 1.92E-28 | 53.52733683 |
| ACVRL1         | -0.623382421 | 2.768970714 | -11.78266648 | 1.98E-28 | 53.49606121 |
| TRBJ2-3        | -0.859507325 | 1.194260562 | -11.7744648  | 2.14E-28 | 53.42059133 |
| TRGV4          | -0.271085003 | 0.316837619 | -11.77029844 | 2.22E-28 | 53.38226483 |
| IL15           | -0.382723477 | 0.845708166 | -11.7536487  | 2.59E-28 | 53.2291796  |
| TRBV12-3       | -0.400483751 | 0.422574751 | -11.7400333  | 2.94E-28 | 53.10408414 |
| RP11-686D22.10 | -0.520366385 | 0.947647678 | -11.7381582  | 2.99E-28 | 53.08686251 |
| TRAV27         | -0.37203183  | 0.390112452 | -11.72700846 | 3.32E-28 | 52.98449132 |
| CLEC5A         | -0.848899317 | 1.665791329 | -11.72478119 | 3.39E-28 | 52.96404827 |
| TRBV15         | -0.325064933 | 0.365675849 | -11.72397296 | 3.41E-28 | 52.95663039 |
| C5orf56        | -0.385380821 | 0.971513978 | -11.70712458 | 3.99E-28 | 52.80206414 |
| AC021188.4     | -0.233598338 | 0.354045036 | -11.7058641  | 4.03E-28 | 52.79050565 |
| HIVEP3         | -0.415234434 | 1.05746877  | -11.70376664 | 4.11E-28 | 52.77127369 |
| RP11-1008C21.1 | -0.566481052 | 0.721978334 | -11.70158856 | 4.20E-28 | 52.75130445 |
| ARHGAP31       | -0.706356287 | 2.190501658 | -11.69503553 | 4.46E-28 | 52.69123737 |
| CLEC1A         | -0.372307963 | 0.881868071 | -11.69118282 | 4.62E-28 | 52.65593116 |
| TRAV36DV7      | -0.338181036 | 0.428239692 | -11.68750066 | 4.78E-28 | 52.62219409 |
| TRBJ2-2P       | -0.808351091 | 1.043592242 | -11.68726731 | 4.79E-28 | 52.62005629 |
| TRBV4-1        | -0.55513297  | 0.657192159 | -11.68545151 | 4.87E-28 | 52.60342169 |
| FLT3LG         | -0.301471743 | 0.754680703 | -11.67919462 | 5.16E-28 | 52.54611361 |
| IL24           | -0.567101241 | 1.119298453 | -11.6711405  | 5.56E-28 | 52.47237009 |
| TRAV25         | -0.332335616 | 0.373722949 | -11.67046536 | 5.59E-28 | 52.46618979 |
| TRAV10         | -0.289333801 | 0.310409007 | -11.66016961 | 6.15E-28 | 52.37196707 |
| RP11-222K16.2  | -0.367437055 | 0.47358224  | -11.6570533  | 6.33E-28 | 52.34345713 |
| CAMK1G         | -0.239881108 | 0.478328676 | -11.64753622 | 6.91E-28 | 52.25641579 |
| TBX5-AS1       | -0.52351072  | 1.116046537 | -11.64562135 | 7.03E-28 | 52.23890768 |
| C19orf38       | -0.567156038 | 1.388574255 | -11.6395376  | 7.44E-28 | 52.18329333 |
| MRGPRF         | -0.667323169 | 1.548719557 | -11.63735589 | 7.59E-28 | 52.16335339 |
| RASA3          | -0.661793615 | 2.412776966 | -11.61551984 | 9.28E-28 | 51.96389811 |
| P2RX1          | -0.513165267 | 0.920715257 | -11.61524218 | 9.30E-28 | 51.96136329 |
| CLEC2D         | -0.572502513 | 1.535196195 | -11.60033485 | 1.07E-27 | 51.82532141 |

|              |              |             |              |          |             |
|--------------|--------------|-------------|--------------|----------|-------------|
| MITF         | -0.509220032 | 1.508775732 | -11.59616544 | 1.11E-27 | 51.78728989 |
| APOBR        | -0.790297583 | 2.343700072 | -11.58331745 | 1.25E-27 | 51.67014561 |
| CLMP         | -0.893832868 | 1.991185877 | -11.5711454  | 1.39E-27 | 51.55923311 |
| TRAV3        | -0.416263411 | 0.590197416 | -11.5707979  | 1.40E-27 | 51.55606764 |
| MEF2C        | -0.633098939 | 1.984206612 | -11.55566939 | 1.61E-27 | 51.41831133 |
| CCL2         | -1.04103464  | 4.222964861 | -11.54988673 | 1.70E-27 | 51.36568335 |
| IRF1         | -0.759694662 | 3.513766559 | -11.54913455 | 1.71E-27 | 51.35883884 |
| RGS1         | -1.151729953 | 4.178608086 | -11.53873829 | 1.88E-27 | 51.26426412 |
| SIGLEC8      | -0.505872157 | 0.735076242 | -11.53483914 | 1.95E-27 | 51.22880629 |
| GFI1         | -0.517149904 | 1.011281394 | -11.53037832 | 2.03E-27 | 51.18824918 |
| OSTM1        | -0.467258331 | 2.834347429 | -11.52696911 | 2.09E-27 | 51.1572592  |
| COL6A5       | -0.440615373 | 0.534322778 | -11.52417082 | 2.15E-27 | 51.13182656 |
| CACNA2D4     | -0.244619292 | 0.573958115 | -11.5238885  | 2.15E-27 | 51.12926086 |
| LAMA2        | -0.699797049 | 1.820943352 | -11.51088419 | 2.42E-27 | 51.0111177  |
| FKBP15       | -0.376228693 | 2.705106143 | -11.48063923 | 3.20E-27 | 50.7366429  |
| TRBV27       | -0.387834071 | 0.444885562 | -11.46871317 | 3.56E-27 | 50.62852826 |
| HLA-F        | -0.965061338 | 4.519475119 | -11.46483551 | 3.69E-27 | 50.59338965 |
| RP11-389C8.2 | -0.428324695 | 1.093783464 | -11.45681801 | 3.97E-27 | 50.52075862 |
| POU2F2       | -0.57245661  | 1.232696402 | -11.44121446 | 4.58E-27 | 50.3794897  |
| DPYD         | -0.892669454 | 3.139630548 | -11.42783492 | 5.18E-27 | 50.25844539 |
| IRF4         | -0.84662827  | 1.509173321 | -11.42678346 | 5.23E-27 | 50.24893633 |
| TGM2         | -0.937964567 | 5.728395317 | -11.42498588 | 5.31E-27 | 50.23268091 |
| PSMB9        | -0.992848581 | 4.205216767 | -11.42043229 | 5.54E-27 | 50.19150946 |
| TREML1       | -0.330842951 | 0.513686368 | -11.41459885 | 5.84E-27 | 50.13878024 |
| APOL6        | -0.663675899 | 3.46583627  | -11.41301277 | 5.92E-27 | 50.1244462  |
| TMC8         | -0.750862276 | 2.600709622 | -11.40709504 | 6.25E-27 | 50.07097547 |
| PDPN         | -0.998418786 | 2.845033651 | -11.39622313 | 6.90E-27 | 49.97278256 |
| LRMP         | -0.66211233  | 1.268396124 | -11.39223854 | 7.16E-27 | 49.93680829 |
| CPA3         | -1.328235269 | 3.231414983 | -11.38883142 | 7.38E-27 | 49.90605343 |
| CARD8        | -0.382567285 | 1.769956683 | -11.3838371  | 7.73E-27 | 49.86098114 |
| GPR132       | -0.664982421 | 1.763249787 | -11.36970033 | 8.79E-27 | 49.73346382 |
| UBE2L6       | -0.781962583 | 5.418649029 | -11.36923914 | 8.82E-27 | 49.72930533 |
| FIBIN        | -0.91116648  | 2.098802302 | -11.35832604 | 9.74E-27 | 49.63093213 |

|          |              |             |              |          |             |
|----------|--------------|-------------|--------------|----------|-------------|
| LXN      | -0.659796664 | 3.551641934 | -11.34430249 | 1.11E-26 | 49.50460198 |
| TPSAB1   | -1.179426091 | 2.972246105 | -11.33332774 | 1.22E-26 | 49.4058008  |
| TNFSF4   | -0.529370395 | 1.079590996 | -11.32967262 | 1.26E-26 | 49.37290768 |
| SGCD     | -0.461507395 | 0.812601379 | -11.32816792 | 1.28E-26 | 49.35936842 |
| ZYX      | -0.640927762 | 5.689065749 | -11.32641431 | 1.30E-26 | 49.34359081 |
| ZNF267   | -0.385302458 | 1.998143379 | -11.31753778 | 1.41E-26 | 49.26374877 |
| PIP4K2A  | -0.590728812 | 3.352790487 | -11.31517793 | 1.44E-26 | 49.24252881 |
| TRBV30   | -0.561049682 | 0.697495315 | -11.3031274  | 1.61E-26 | 49.13420985 |
| FBN1     | -0.926393033 | 2.814236622 | -11.28491977 | 1.90E-26 | 48.9706756  |
| N4BP2L1  | -0.519707922 | 1.68932299  | -11.23848034 | 2.88E-26 | 48.55428007 |
| CTSZ     | -0.605177657 | 7.474858099 | -11.23777558 | 2.90E-26 | 48.54796875 |
| BMP2K    | -0.352160114 | 1.082869936 | -11.23445814 | 2.99E-26 | 48.51826319 |
| LRRK1    | -0.417519137 | 1.273905571 | -11.23067303 | 3.10E-26 | 48.48437644 |
| MS4A1    | -1.092330898 | 1.454760394 | -11.2293457  | 3.13E-26 | 48.47249484 |
| CXCL13   | -1.596027501 | 3.737578819 | -11.22575858 | 3.24E-26 | 48.4403891  |
| SYNPO2   | -0.508759174 | 1.034133808 | -11.22040369 | 3.40E-26 | 48.39247262 |
| MRVI1    | -0.583010498 | 1.614458645 | -11.21909784 | 3.44E-26 | 48.38078968 |
| TGFB1    | -0.704426695 | 4.529146096 | -11.20799296 | 3.80E-26 | 48.28147155 |
| FCRLA    | -0.756105827 | 1.028584043 | -11.20533127 | 3.89E-26 | 48.257675   |
| FBLN1    | -0.993622654 | 4.261925658 | -11.19684024 | 4.20E-26 | 48.18178447 |
| CCL23    | -0.690484113 | 1.112446815 | -11.19426383 | 4.30E-26 | 48.15876396 |
| IL18R1   | -0.47806282  | 1.033642748 | -11.18983196 | 4.47E-26 | 48.11917219 |
| LSAMP    | -0.517341534 | 1.032792688 | -11.17761557 | 4.99E-26 | 48.01008624 |
| GBP1P1   | -0.75145495  | 1.506900326 | -11.17619694 | 5.06E-26 | 47.99742325 |
| FASLG    | -0.562095206 | 0.816530088 | -11.17235707 | 5.24E-26 | 47.96315254 |
| GPR82    | -0.287535878 | 0.444131489 | -11.16595338 | 5.55E-26 | 47.90601551 |
| SIGLEC11 | -0.26549461  | 0.369066471 | -11.15752809 | 5.98E-26 | 47.83087048 |
| BTN2A2   | -0.473414128 | 2.125421382 | -11.14823565 | 6.50E-26 | 47.7480307  |
| AOC3     | -0.964487615 | 3.333101691 | -11.14553387 | 6.66E-26 | 47.72395279 |
| TRAV38-1 | -0.235313214 | 0.247745042 | -11.13175676 | 7.54E-26 | 47.60122725 |
| FAP      | -0.793349733 | 1.864618164 | -11.11732322 | 8.59E-26 | 47.47275189 |
| RAI2     | -0.687169346 | 2.099042733 | -11.11402211 | 8.84E-26 | 47.44338226 |
| KCNK13   | -0.425096378 | 0.703216901 | -11.11062204 | 9.12E-26 | 47.4131376  |

|              |              |             |              |          |             |
|--------------|--------------|-------------|--------------|----------|-------------|
| RARRES1      | -1.170120763 | 3.424423432 | -11.10099163 | 9.94E-26 | 47.32750247 |
| TMEM52B      | -0.288963821 | 0.46289     | -11.10071285 | 9.96E-26 | 47.32502414 |
| SPON1        | -0.988492115 | 3.065730327 | -11.09838823 | 1.02E-25 | 47.30436032 |
| CCRL2        | -0.633263634 | 1.673969676 | -11.09618828 | 1.04E-25 | 47.28480704 |
| SOCS1        | -0.778463147 | 2.840728681 | -11.09377249 | 1.06E-25 | 47.263338   |
| PLCL2        | -0.517354429 | 1.391336635 | -11.09174342 | 1.08E-25 | 47.24530795 |
| CSGALNACT2   | -0.449963245 | 3.291245103 | -11.0719647  | 1.29E-25 | 47.06966088 |
| C1QTNF1      | -0.74451337  | 2.354645481 | -11.0718797  | 1.29E-25 | 47.06890642 |
| KLRD1        | -0.269759266 | 0.337369704 | -11.06868029 | 1.33E-25 | 47.04051155 |
| ABCA9        | -0.260690496 | 0.408053879 | -11.06722818 | 1.34E-25 | 47.02762572 |
| ARSB         | -0.410686033 | 2.027665678 | -11.06630988 | 1.36E-25 | 47.01947734 |
| CSF1         | -0.85006552  | 3.548634256 | -11.05495816 | 1.50E-25 | 46.91878363 |
| FMO3         | -0.770545194 | 1.839180057 | -11.04842552 | 1.59E-25 | 46.86086508 |
| EPST11       | -0.773582166 | 2.563085014 | -11.04488831 | 1.64E-25 | 46.82951277 |
| S1PR1        | -0.713516423 | 2.913427784 | -11.02511001 | 1.96E-25 | 46.65431823 |
| TLR10        | -0.620778885 | 0.864727202 | -11.01496856 | 2.15E-25 | 46.56455988 |
| CCL4L1       | -0.837433839 | 1.970935046 | -11.01302247 | 2.18E-25 | 46.54734143 |
| FAM26E       | -0.363549627 | 0.735102586 | -11.00969402 | 2.25E-25 | 46.51789656 |
| PLD4         | -0.48372375  | 0.824262868 | -11.00886463 | 2.27E-25 | 46.51056029 |
| GJA5         | -0.800652135 | 2.978534949 | -11.00758874 | 2.29E-25 | 46.49927515 |
| S1PR4        | -0.660304281 | 2.082549948 | -10.99980682 | 2.46E-25 | 46.4304622  |
| TNS3         | -0.626453777 | 3.732542629 | -10.99182412 | 2.64E-25 | 46.35990441 |
| AF127936.5   | -0.289478378 | 0.420801318 | -10.9870701  | 2.75E-25 | 46.31789918 |
| BNC2         | -0.336752172 | 0.569908261 | -10.98130745 | 2.90E-25 | 46.26699682 |
| RASSF5       | -0.615227923 | 2.923097654 | -10.97100258 | 3.17E-25 | 46.17601287 |
| PDZRN3       | -0.545991312 | 1.324432839 | -10.96918146 | 3.23E-25 | 46.15993921 |
| GLT8D2       | -0.680853951 | 1.756358741 | -10.96719687 | 3.28E-25 | 46.14242461 |
| TRBV21-1     | -0.238872421 | 0.219092377 | -10.96497867 | 3.35E-25 | 46.12285057 |
| ATG7         | -0.310043143 | 2.043123467 | -10.9629818  | 3.41E-25 | 46.1052317  |
| PLSCR4       | -0.632328693 | 2.566099699 | -10.96012811 | 3.50E-25 | 46.08005619 |
| LILRA5       | -0.655340098 | 1.466170814 | -10.95850415 | 3.55E-25 | 46.06573132 |
| LPAR5        | -0.576928662 | 1.454865939 | -10.95637975 | 3.62E-25 | 46.04699406 |
| RP11-356I2.4 | -0.280212277 | 0.558095992 | -10.95190751 | 3.76E-25 | 46.00755592 |

|             |              |             |              |          |             |
|-------------|--------------|-------------|--------------|----------|-------------|
| RP4-728D4.2 | -0.29664029  | 0.613067664 | -10.94228109 | 4.10E-25 | 45.92269931 |
| GPR141      | -0.355220364 | 0.548083334 | -10.93803725 | 4.26E-25 | 45.88530445 |
| BICC1       | -0.751712254 | 1.739488847 | -10.93383583 | 4.42E-25 | 45.84829217 |
| BCL11B      | -0.478108178 | 0.886382493 | -10.92777591 | 4.66E-25 | 45.79492276 |
| CXCL11      | -1.125688174 | 1.848112399 | -10.89610614 | 6.18E-25 | 45.51630326 |
| LTBP2       | -0.963538622 | 4.411987841 | -10.89344739 | 6.32E-25 | 45.49293504 |
| CD300LB     | -0.284066141 | 0.532028263 | -10.89313974 | 6.34E-25 | 45.49023129 |
| COL8A2      | -0.952896165 | 2.543903142 | -10.89253789 | 6.37E-25 | 45.48494206 |
| CD93        | -0.77179212  | 3.612826269 | -10.89252306 | 6.38E-25 | 45.48481171 |
| PTPN6       | -0.437227743 | 3.965414989 | -10.89153761 | 6.43E-25 | 45.47615184 |
| HCP5        | -0.888431896 | 4.000871473 | -10.88286107 | 6.95E-25 | 45.39992479 |
| C11orf21    | -0.374982695 | 0.554224515 | -10.88281422 | 6.95E-25 | 45.39951329 |
| IGFBP7      | -0.749801366 | 6.92075945  | -10.87545387 | 7.42E-25 | 45.33487897 |
| GSTM5       | -0.329121254 | 0.559439346 | -10.87030637 | 7.76E-25 | 45.28969253 |
| APOC1       | -1.156371773 | 5.86686879  | -10.86676549 | 8.01E-25 | 45.25861719 |
| FAM159A     | -0.272999477 | 0.46709166  | -10.85575327 | 8.83E-25 | 45.16201199 |
| DUSP2       | -0.750012911 | 2.400424124 | -10.85404115 | 8.96E-25 | 45.14699773 |
| APOBEC3C    | -0.74850162  | 4.106481023 | -10.83684058 | 1.04E-24 | 44.99624024 |
| QKI         | -0.472366777 | 2.681470829 | -10.82832452 | 1.13E-24 | 44.92165426 |
| OR211P      | -1.257227925 | 2.456845228 | -10.82525343 | 1.16E-24 | 44.89476569 |
| CYP1B1      | -0.970278481 | 3.386916203 | -10.80666547 | 1.36E-24 | 44.7321215  |
| FCGR2C      | -0.613293408 | 1.205974747 | -10.80497564 | 1.38E-24 | 44.71734407 |
| RHOJ        | -0.510096646 | 1.851422226 | -10.77899671 | 1.74E-24 | 44.49034089 |
| IFNGR1      | -0.592394399 | 5.447463395 | -10.77406793 | 1.82E-24 | 44.44731156 |
| WISP1       | -0.760928267 | 1.932290702 | -10.77399481 | 1.82E-24 | 44.44667333 |
| CTSO        | -0.655621266 | 4.113695806 | -10.77363925 | 1.82E-24 | 44.44356967 |
| GIT2        | -0.279441707 | 1.661547915 | -10.76908844 | 1.90E-24 | 44.40385189 |
| XCL2        | -0.614348691 | 1.035174623 | -10.76584661 | 1.95E-24 | 44.37556481 |
| SPIB        | -0.727251627 | 0.942486724 | -10.76037423 | 2.05E-24 | 44.32782659 |
| IKZF3       | -0.670967319 | 1.87867687  | -10.75847685 | 2.08E-24 | 44.3112784  |
| CAPG        | -0.681560795 | 6.296377519 | -10.75742801 | 2.10E-24 | 44.30213164 |
| PIM2        | -0.901155381 | 4.524415757 | -10.75520758 | 2.14E-24 | 44.28276931 |
| TGFB3       | -0.636303568 | 2.393754006 | -10.73219463 | 2.62E-24 | 44.08224157 |

|               |              |             |              |          |             |
|---------------|--------------|-------------|--------------|----------|-------------|
| PTRF          | -0.777858341 | 5.46458766  | -10.73137124 | 2.64E-24 | 44.07507178 |
| UNC5C         | -0.351042282 | 0.70967209  | -10.72668781 | 2.75E-24 | 44.0342965  |
| RP11-118B22.4 | -0.278022794 | 0.322891649 | -10.72588415 | 2.77E-24 | 44.02730068 |
| AC020571.3    | -0.354226047 | 0.678424422 | -10.7227367  | 2.85E-24 | 43.99990561 |
| LAMA4         | -0.689813134 | 2.57879811  | -10.72147294 | 2.88E-24 | 43.98890737 |
| NEXN          | -0.588987616 | 1.758606436 | -10.71866583 | 2.96E-24 | 43.9644806  |
| SPARCL1       | -0.884630777 | 5.310786946 | -10.71692011 | 3.00E-24 | 43.9492918  |
| ARHGEF3       | -0.400000973 | 2.731072359 | -10.69049895 | 3.78E-24 | 43.71960026 |
| AIM2          | -1.160552348 | 1.976827934 | -10.68089176 | 4.12E-24 | 43.63616827 |
| PDE4B         | -0.573950528 | 1.704542857 | -10.67084668 | 4.50E-24 | 43.54898373 |
| ZNF366        | -0.300541775 | 0.554295857 | -10.66817226 | 4.60E-24 | 43.52578022 |
| CD79A         | -1.356595797 | 3.787152902 | -10.66648506 | 4.67E-24 | 43.51114377 |
| CASP5         | -0.265767191 | 0.37748014  | -10.66030394 | 4.93E-24 | 43.45753501 |
| CD274         | -0.891477261 | 1.911321449 | -10.65752837 | 5.05E-24 | 43.43346888 |
| SPOCK2        | -0.926352847 | 3.284569638 | -10.65133568 | 5.33E-24 | 43.37978815 |
| MAN2B1        | -0.469398045 | 4.506320616 | -10.64109627 | 5.83E-24 | 43.29107171 |
| RHOH          | -0.557680924 | 1.356804288 | -10.62984617 | 6.43E-24 | 43.19366018 |
| A2M           | -0.990665334 | 7.083376149 | -10.62366671 | 6.79E-24 | 43.14018152 |
| TCL1A         | -0.554025782 | 0.578345058 | -10.60321825 | 8.12E-24 | 42.96335456 |
| S100B         | -1.152702302 | 2.414621366 | -10.60229797 | 8.18E-24 | 42.95540158 |
| PXK           | -0.366286323 | 1.981328179 | -10.59878653 | 8.44E-24 | 42.92505981 |
| BIRC3         | -0.999386021 | 3.373086222 | -10.59624788 | 8.63E-24 | 42.90312775 |
| CERKL         | -0.576489716 | 1.998668691 | -10.59537322 | 8.69E-24 | 42.89557211 |
| PRKCH         | -0.421104369 | 2.266537032 | -10.59152857 | 8.99E-24 | 42.86236515 |
| OGFRL1        | -0.599440106 | 2.502581322 | -10.58803483 | 9.27E-24 | 42.83219568 |
| RARRES2       | -0.957315669 | 5.047998217 | -10.57248763 | 1.06E-23 | 42.69801724 |
| SMIM3         | -0.733786753 | 3.4590603   | -10.56525404 | 1.13E-23 | 42.63563096 |
| RP11-733O18.1 | -0.205022902 | 0.309516348 | -10.56311307 | 1.15E-23 | 42.6171713  |
| PLEKHA2       | -0.554536096 | 2.794925677 | -10.55185187 | 1.27E-23 | 42.52011495 |
| PALD1         | -0.587754277 | 2.128659765 | -10.55148513 | 1.27E-23 | 42.51695526 |
| TRAV2         | -0.494832453 | 0.767952876 | -10.53706461 | 1.44E-23 | 42.39276828 |
| MMP19         | -0.726741457 | 2.059004324 | -10.53475928 | 1.47E-23 | 42.37292522 |
| GNB4          | -0.598526508 | 2.416967481 | -10.52927965 | 1.54E-23 | 42.32577032 |

|               |              |             |              |          |             |
|---------------|--------------|-------------|--------------|----------|-------------|
| TMIGD2        | -0.343054212 | 0.515183885 | -10.52897905 | 1.55E-23 | 42.32318397 |
| OR7E47P       | -0.575683321 | 1.330211723 | -10.5223474  | 1.64E-23 | 42.26613733 |
| TBC1D2B       | -0.47208663  | 2.685668625 | -10.52194215 | 1.65E-23 | 42.26265198 |
| CD1C          | -0.985832375 | 1.875778559 | -10.52176804 | 1.65E-23 | 42.26115465 |
| CDH11         | -0.853384439 | 2.955769327 | -10.51832277 | 1.70E-23 | 42.23152782 |
| TRBV24-1      | -0.363770274 | 0.48089663  | -10.50291505 | 1.94E-23 | 42.09910808 |
| OSTF1         | -0.368659928 | 5.089855437 | -10.49247055 | 2.13E-23 | 42.00941428 |
| COL6A2        | -0.994651781 | 6.04857957  | -10.49030006 | 2.17E-23 | 41.99078197 |
| CYP27A1       | -0.911328206 | 4.233873654 | -10.48783409 | 2.21E-23 | 41.96961616 |
| LINC01215     | -0.414578522 | 0.528294259 | -10.48750125 | 2.22E-23 | 41.96675954 |
| RP11-383H13.1 | -0.35338498  | 0.615026552 | -10.483448   | 2.30E-23 | 41.93197737 |
| RP11-598F7.3  | -0.590279189 | 0.772059424 | -10.47275478 | 2.52E-23 | 41.84025681 |
| ISM1          | -0.835746699 | 1.867314879 | -10.46807386 | 2.63E-23 | 41.80012523 |
| KIAA1755      | -0.288499499 | 0.644166497 | -10.45485135 | 2.94E-23 | 41.68682457 |
| EVL           | -0.564392308 | 2.931845073 | -10.45482177 | 2.94E-23 | 41.68657119 |
| ELK3          | -0.62362088  | 4.024979303 | -10.45068779 | 3.05E-23 | 41.65116691 |
| HEG1          | -0.709018574 | 2.922794281 | -10.42016442 | 3.97E-23 | 41.39003528 |
| MYO5A         | -0.46259     | 1.874595467 | -10.41423991 | 4.18E-23 | 41.3394069  |
| ZNF683        | -0.750322007 | 1.151346867 | -10.40803846 | 4.41E-23 | 41.28643171 |
| HTRA4         | -0.551308423 | 0.862053321 | -10.40771225 | 4.42E-23 | 41.28364569 |
| TLR2          | -0.911473134 | 3.313327429 | -10.40581964 | 4.50E-23 | 41.26748259 |
| GRAP          | -0.240991833 | 0.545029454 | -10.40287471 | 4.61E-23 | 41.24233645 |
| TMEM236       | -0.264488059 | 0.371418641 | -10.4009198  | 4.69E-23 | 41.22564634 |
| RP1-47M23.3   | -0.232368529 | 0.258644212 | -10.39937962 | 4.75E-23 | 41.21249845 |
| AC092580.4    | -0.875132316 | 1.908888359 | -10.3991163  | 4.76E-23 | 41.21025072 |
| ZBP1          | -0.529081521 | 0.997902384 | -10.3956089  | 4.91E-23 | 41.18031453 |
| RP11-169D4.2  | -0.266831584 | 0.48041574  | -10.39504972 | 4.93E-23 | 41.17554248 |
| FBLN2         | -0.929463179 | 3.676892747 | -10.39451207 | 4.96E-23 | 41.17095423 |
| SYT11         | -0.610184537 | 2.048170127 | -10.39303774 | 5.02E-23 | 41.15837349 |
| TSPAN2        | -0.532212087 | 1.297889815 | -10.38190357 | 5.52E-23 | 41.06339985 |
| CHIT1         | -1.431233368 | 2.472382587 | -10.36633098 | 6.32E-23 | 40.93067654 |
| GPR124        | -0.601397413 | 2.216159711 | -10.36424118 | 6.43E-23 | 40.91287522 |
| SYNPO         | -0.694377197 | 3.516278502 | -10.36350895 | 6.47E-23 | 40.90663848 |



|               |              |             |              |          |             |
|---------------|--------------|-------------|--------------|----------|-------------|
| IL18RAP       | -0.358184892 | 0.592957002 | -10.36328037 | 6.48E-23 | 40.90469156 |
| NLRC5         | -0.657251915 | 2.294437445 | -10.36163496 | 6.58E-23 | 40.89067814 |
| PAPLN         | -0.661296337 | 2.077955985 | -10.35782332 | 6.80E-23 | 40.85822092 |
| SP100         | -0.384622185 | 2.850168895 | -10.35697264 | 6.84E-23 | 40.85097821 |
| VASH1         | -0.541813038 | 2.21327307  | -10.35692513 | 6.85E-23 | 40.85057376 |
| JAM2          | -0.473321925 | 1.428247543 | -10.3554165  | 6.94E-23 | 40.83773017 |
| KAT2B         | -0.493222576 | 2.228353044 | -10.35040137 | 7.24E-23 | 40.79504315 |
| LRRN4CL       | -0.346349156 | 0.528687887 | -10.34103503 | 7.85E-23 | 40.7153557  |
| NBL1          | -0.835840016 | 4.117031463 | -10.33825601 | 8.04E-23 | 40.69172115 |
| CD8B          | -0.711816048 | 1.401044883 | -10.33142897 | 8.52E-23 | 40.63367708 |
| LGALS9        | -0.793063421 | 3.836702524 | -10.31649797 | 9.69E-23 | 40.50681879 |
| LMCD1         | -0.485971723 | 2.040960573 | -10.31520491 | 9.80E-23 | 40.49583816 |
| RP11-473M20.9 | -0.438229481 | 0.806905239 | -10.31410071 | 9.89E-23 | 40.486462   |
| LINC01358     | -0.320119812 | 0.51846272  | -10.30059141 | 1.11E-22 | 40.37180232 |
| CTSW          | -0.908970616 | 2.594991129 | -10.29947803 | 1.12E-22 | 40.36235687 |
| GAS1          | -0.805688143 | 1.743311307 | -10.29898995 | 1.13E-22 | 40.35821645 |
| RGS9          | -0.253555538 | 0.467614754 | -10.29659349 | 1.15E-22 | 40.33788879 |
| TRDC          | -0.718669884 | 1.17494167  | -10.28866287 | 1.23E-22 | 40.2706402  |
| COL8A1        | -0.956717804 | 3.686278323 | -10.28592759 | 1.26E-22 | 40.24745381 |
| TNFAIP8L3     | -0.525994665 | 1.441041636 | -10.28497552 | 1.27E-22 | 40.2393843  |
| ITGBL1        | -0.781805353 | 1.991470391 | -10.28495018 | 1.27E-22 | 40.23916952 |
| GMIP          | -0.435267231 | 3.238242524 | -10.28284251 | 1.29E-22 | 40.22130711 |
| LINC00987     | -0.267239319 | 0.611438403 | -10.27540262 | 1.38E-22 | 40.15827334 |
| MEOX2         | -0.640882541 | 1.394161238 | -10.2642261  | 1.52E-22 | 40.06363689 |
| RP11-452C13.1 | -0.243706403 | 0.370266996 | -10.2529942  | 1.67E-22 | 39.96859894 |
| MS4A2         | -0.559792382 | 0.873267134 | -10.24956451 | 1.72E-22 | 39.9395923  |
| 6-Sep         | -0.533908572 | 3.019297112 | -10.2430868  | 1.82E-22 | 39.8848243  |
| NTAN1         | -0.375381983 | 2.635640566 | -10.24215015 | 1.83E-22 | 39.87690692 |
| PTGIS         | -0.847615818 | 2.21740902  | -10.2371758  | 1.91E-22 | 39.83486735 |
| CYGB          | -0.554958647 | 2.566640305 | -10.23685987 | 1.91E-22 | 39.83219782 |
| IL32          | -0.870207231 | 4.521082628 | -10.22374536 | 2.14E-22 | 39.72142951 |
| HLA-DQB2      | -1.393790351 | 4.403555229 | -10.22316005 | 2.15E-22 | 39.71648799 |
| CCL17         | -1.160794436 | 1.957701334 | -10.21915764 | 2.23E-22 | 39.68270233 |

|              |              |             |              |          |             |
|--------------|--------------|-------------|--------------|----------|-------------|
| RP1-111C20.3 | -0.2442211   | 0.303638663 | -10.217037   | 2.27E-22 | 39.6648048  |
| TRAV1-2      | -0.350005749 | 0.539264326 | -10.2144171  | 2.32E-22 | 39.64269704 |
| TNFRSF8      | -0.347633053 | 0.548186888 | -10.20361679 | 2.54E-22 | 39.55159877 |
| COX7A1       | -0.580871141 | 2.430741864 | -10.20127842 | 2.59E-22 | 39.53188342 |
| HTRA1        | -0.787425365 | 5.205335719 | -10.19647479 | 2.70E-22 | 39.49139209 |
| PODN         | -0.834969898 | 3.067004567 | -10.19647178 | 2.70E-22 | 39.49136674 |
| RP11-67C2.2  | -0.51182198  | 0.944652319 | -10.1947031  | 2.74E-22 | 39.47646104 |
| SPARC        | -0.832816489 | 7.759217036 | -10.19410921 | 2.76E-22 | 39.4714564  |
| PIK3IP1      | -0.622234312 | 3.834477021 | -10.19039601 | 2.84E-22 | 39.44016992 |
| LRP1         | -0.751114655 | 4.120731289 | -10.18915072 | 2.87E-22 | 39.42967912 |
| MAP3K3       | -0.441144629 | 2.829994812 | -10.18823964 | 2.90E-22 | 39.42200437 |
| SLIT3        | -0.721120249 | 1.440486684 | -10.1870733  | 2.93E-22 | 39.41217997 |
| EGFL6        | -0.714698018 | 2.602136353 | -10.18343495 | 3.02E-22 | 39.3815379  |
| CLEC17A      | -0.325310534 | 0.378103284 | -10.18228208 | 3.05E-22 | 39.37183001 |
| TRAV24       | -0.282104545 | 0.33070119  | -10.17669598 | 3.20E-22 | 39.32480151 |
| PLA2G15      | -0.433266294 | 3.010256345 | -10.17387892 | 3.27E-22 | 39.30109149 |
| IRF5         | -0.613998789 | 2.450689812 | -10.17380946 | 3.28E-22 | 39.30050691 |
| CCDC109B     | -0.599595072 | 2.575358728 | -10.17156969 | 3.34E-22 | 39.28165895 |
| MAGI2-AS3    | -0.388123851 | 0.973104131 | -10.17076917 | 3.36E-22 | 39.27492306 |
| CD19         | -0.763841884 | 1.231242619 | -10.16951487 | 3.40E-22 | 39.26436968 |
| STAMBPL1     | -0.363956026 | 1.132006403 | -10.16828675 | 3.43E-22 | 39.25403734 |
| PSAP         | -0.473301085 | 9.19263223  | -10.16505944 | 3.53E-22 | 39.22688947 |
| MXRA5        | -1.034353581 | 3.428264963 | -10.15685833 | 3.78E-22 | 39.15792791 |
| KIAA1462     | -0.639381216 | 2.355126004 | -10.1476669  | 4.09E-22 | 39.08068227 |
| FN1          | -1.074201936 | 7.042897367 | -10.14678112 | 4.12E-22 | 39.07324054 |
| LDB2         | -0.523135506 | 1.827304376 | -10.14192135 | 4.29E-22 | 39.03241946 |
| ITGA8        | -0.648331386 | 1.510523807 | -10.1370645  | 4.47E-22 | 38.99163568 |
| ZNF521       | -0.513488991 | 1.188840003 | -10.13674715 | 4.49E-22 | 38.9889713  |
| ARL6IP5      | -0.548115036 | 6.205993464 | -10.1334021  | 4.62E-22 | 38.96089038 |
| AP003774.1   | -0.281607125 | 0.4262188   | -10.13166617 | 4.68E-22 | 38.94632005 |
| CD1B         | -0.575888137 | 0.719886319 | -10.13159283 | 4.69E-22 | 38.94570458 |
| TMEM106A     | -0.394767091 | 2.136660165 | -10.11923688 | 5.20E-22 | 38.8420443  |
| ST3GAL2      | -0.381488707 | 1.917181095 | -10.11865774 | 5.23E-22 | 38.83718759 |

|               |              |             |              |          |             |
|---------------|--------------|-------------|--------------|----------|-------------|
| CD68          | -0.440166628 | 1.043745939 | -10.11540714 | 5.38E-22 | 38.80993157 |
| ENG           | -0.645476517 | 5.111466408 | -10.11382935 | 5.45E-22 | 38.7967039  |
| TMEM229B      | -0.373997266 | 0.912196106 | -10.11086094 | 5.59E-22 | 38.77182156 |
| DLEU7         | -0.200896193 | 0.466758725 | -10.10928293 | 5.66E-22 | 38.75859604 |
| RGL1          | -0.669223823 | 3.110616032 | -10.0984168  | 6.21E-22 | 38.66756232 |
| PDLIM3        | -0.677492934 | 2.025985897 | -10.09678122 | 6.29E-22 | 38.65386547 |
| RGS19         | -0.492051471 | 3.532267265 | -10.09478047 | 6.40E-22 | 38.63711244 |
| RP11-532F6.3  | -0.270036725 | 0.463812224 | -10.09467885 | 6.41E-22 | 38.6362616  |
| LINC00528     | -0.214748624 | 0.343939014 | -10.0927124  | 6.51E-22 | 38.61979814 |
| CCL22         | -0.948455071 | 2.200410419 | -10.0883628  | 6.76E-22 | 38.58338983 |
| TRAV26-2      | -0.33357599  | 0.389932494 | -10.08728516 | 6.82E-22 | 38.5743711  |
| NAAA          | -0.496285843 | 2.471314154 | -10.0867908  | 6.85E-22 | 38.57023398 |
| CFP           | -0.397591744 | 0.782986507 | -10.08478735 | 6.97E-22 | 38.55346941 |
| RNASE2        | -0.653470737 | 1.39751023  | -10.08190153 | 7.14E-22 | 38.52932502 |
| IL7           | -0.449389981 | 1.139294661 | -10.06969317 | 7.91E-22 | 38.42723369 |
| PRELP         | -0.978642086 | 3.543454568 | -10.06955652 | 7.92E-22 | 38.42609139 |
| DACT3         | -0.405985494 | 1.051010087 | -10.06818165 | 8.01E-22 | 38.41459938 |
| SLC2A5        | -0.592275136 | 1.158304538 | -10.0649491  | 8.24E-22 | 38.3875838  |
| TPK1          | -0.28286446  | 0.694756218 | -10.05111503 | 9.26E-22 | 38.27203236 |
| SLIT2         | -0.608556992 | 1.614320478 | -10.04169541 | 1.00E-21 | 38.19341345 |
| GFPT2         | -0.707993031 | 1.961153649 | -10.03320946 | 1.08E-21 | 38.12262897 |
| OLFML2B       | -0.783353492 | 3.232014452 | -10.02802266 | 1.12E-21 | 38.07938347 |
| AC017002.1    | -0.213411149 | 0.352034623 | -10.02563101 | 1.15E-21 | 38.05944783 |
| TTC24         | -0.207053041 | 0.22625189  | -10.02536557 | 1.15E-21 | 38.05723548 |
| TBX5          | -0.515875356 | 1.468039975 | -10.02055721 | 1.20E-21 | 38.01716548 |
| GPR137B       | -0.586335547 | 3.23618047  | -10.0190047  | 1.21E-21 | 38.00423057 |
| SLC29A3       | -0.461201585 | 2.753948651 | -10.01461674 | 1.26E-21 | 37.9676788  |
| RP11-472N13.3 | -0.305444738 | 0.473920531 | -10.01407437 | 1.26E-21 | 37.96316166 |
| TAGLN         | -0.856352933 | 5.343994063 | -9.996249345 | 1.47E-21 | 37.81479373 |
| CLEC6A        | -0.256168463 | 0.258061083 | -9.987513849 | 1.58E-21 | 37.74214729 |
| IL1B          | -0.70760342  | 1.623812121 | -9.986118491 | 1.60E-21 | 37.73054707 |
| FCRL6         | -0.456392368 | 0.793039494 | -9.985088826 | 1.61E-21 | 37.72198772 |
| LDLRAD4       | -0.402361325 | 0.983646714 | -9.984164547 | 1.63E-21 | 37.7143049  |

|               |              |             |              |          |             |
|---------------|--------------|-------------|--------------|----------|-------------|
| KMO           | -0.359268361 | 0.788136714 | -9.983721624 | 1.63E-21 | 37.71062339 |
| MRAS          | -0.45444672  | 2.078922495 | -9.956267298 | 2.05E-21 | 37.48263956 |
| PRDM6         | -0.343850548 | 0.734398002 | -9.945776221 | 2.24E-21 | 37.39563094 |
| CTD-2341M24.1 | -0.275066865 | 0.463514264 | -9.933051352 | 2.50E-21 | 37.29017831 |
| RPL32P1       | -0.421308709 | 0.578800416 | -9.928294425 | 2.60E-21 | 37.2507802  |
| TRDV1         | -0.489991521 | 0.569955075 | -9.927411489 | 2.62E-21 | 37.24346888 |
| MMP9          | -1.243139373 | 4.545456717 | -9.927029782 | 2.62E-21 | 37.24030822 |
| COL6A6        | -0.518573584 | 0.711156906 | -9.925850013 | 2.65E-21 | 37.23053984 |
| HLA-DQB1-AS1  | -0.909527711 | 2.076591812 | -9.920837345 | 2.76E-21 | 37.18904408 |
| FILIP1L       | -0.748961368 | 3.034001091 | -9.909222253 | 3.05E-21 | 37.09294843 |
| UBD           | -1.238472588 | 2.98474392  | -9.90886747  | 3.05E-21 | 37.09001202 |
| AEBP1         | -0.970745187 | 5.927761914 | -9.908724178 | 3.06E-21 | 37.08882699 |
| SP110         | -0.322258425 | 1.398958435 | -9.903977312 | 3.18E-21 | 37.0495766  |
| ADAMTS2       | -0.734969294 | 2.313443343 | -9.898237736 | 3.34E-21 | 37.00213461 |
| CXorf65       | -0.313398283 | 0.475323169 | -9.896621692 | 3.38E-21 | 36.98878009 |
| PDGFRB        | -0.691039207 | 4.065279461 | -9.896225534 | 3.40E-21 | 36.98550658 |
| FBXL7         | -0.498121872 | 1.41389012  | -9.894081981 | 3.46E-21 | 36.96779561 |
| PTK2B         | -0.551716177 | 2.904520013 | -9.893099754 | 3.48E-21 | 36.95968088 |
| STK4          | -0.372502319 | 2.701319784 | -9.883844239 | 3.76E-21 | 36.88324239 |
| RASL12        | -0.596492645 | 2.308763801 | -9.866567952 | 4.35E-21 | 36.74069116 |
| TRBV13        | -0.34010944  | 0.377986972 | -9.861220768 | 4.55E-21 | 36.69660406 |
| NUGGC         | -0.412841457 | 0.645625027 | -9.858957727 | 4.63E-21 | 36.6779503  |
| DOCK4         | -0.450215205 | 1.729257489 | -9.847417402 | 5.10E-21 | 36.58287066 |
| RP11-428G5.5  | -0.283591837 | 0.30213319  | -9.846405199 | 5.14E-21 | 36.57453478 |
| AC069363.1    | -0.291893519 | 0.361249664 | -9.842369156 | 5.32E-21 | 36.54130218 |
| OMD           | -0.706389243 | 1.115672231 | -9.842074406 | 5.33E-21 | 36.53887559 |
| ENPP2         | -0.710401756 | 3.05358689  | -9.841193051 | 5.37E-21 | 36.53161991 |
| GZMM          | -0.764191222 | 1.757971417 | -9.83369616  | 5.72E-21 | 36.46992014 |
| LRRC32        | -0.617970729 | 2.942024419 | -9.833355673 | 5.73E-21 | 36.46711866 |
| GAS6          | -0.763652279 | 3.928617822 | -9.830342813 | 5.88E-21 | 36.44233218 |
| TSPAN32       | -0.342210576 | 0.57860301  | -9.808323254 | 7.06E-21 | 36.26133497 |
| TGFBI         | -1.052579075 | 4.762550696 | -9.804897699 | 7.26E-21 | 36.23320207 |
| TAP2          | -0.600906877 | 3.010001049 | -9.793096107 | 8.01E-21 | 36.13633047 |

|               |              |             |              |          |             |
|---------------|--------------|-------------|--------------|----------|-------------|
| FCRL1         | -0.421032303 | 0.466394999 | -9.792896563 | 8.02E-21 | 36.13469323 |
| LIMS1         | -0.383664328 | 3.36213155  | -9.791224701 | 8.13E-21 | 36.12097656 |
| CALD1         | -0.683504742 | 4.113399254 | -9.790741195 | 8.17E-21 | 36.11700996 |
| HLA-DQA2      | -1.505787634 | 4.421629564 | -9.788045372 | 8.35E-21 | 36.09489635 |
| RP11-24F11.2  | -0.504320764 | 1.123386355 | -9.781831847 | 8.79E-21 | 36.04394302 |
| CTD-2353F22.1 | -0.258832446 | 0.388683698 | -9.779858738 | 8.94E-21 | 36.02776732 |
| ITPRIP        | -0.533657733 | 2.44595734  | -9.76700006  | 9.94E-21 | 35.92240503 |
| MRPS26        | 0.579064284  | 5.206117237 | 9.766667078  | 9.97E-21 | 35.91967786 |
| LMOD1         | -0.701608313 | 2.222607063 | -9.762786471 | 1.03E-20 | 35.88789985 |
| CD1E          | -0.780633515 | 1.185143678 | -9.756816328 | 1.08E-20 | 35.83902748 |
| COL6A1        | -0.905412631 | 5.576867672 | -9.754796126 | 1.10E-20 | 35.82249444 |
| PSMB10        | -0.619820864 | 4.13055127  | -9.743266206 | 1.21E-20 | 35.72817961 |
| FYN           | -0.576330114 | 2.705636824 | -9.74209484  | 1.22E-20 | 35.71860206 |
| APOBEC3H      | -0.501307627 | 1.044582998 | -9.741985019 | 1.22E-20 | 35.71770416 |
| CDK14         | -0.567717508 | 1.932900645 | -9.735588289 | 1.29E-20 | 35.66541617 |
| FMO1          | -0.493390556 | 0.827303091 | -9.733354817 | 1.31E-20 | 35.64716487 |
| MAT2B         | -0.415159296 | 4.02090607  | -9.73170802  | 1.33E-20 | 35.63370952 |
| APOBEC3D      | -0.535609665 | 1.724399858 | -9.72849565  | 1.37E-20 | 35.60746694 |
| RGS10         | -0.698718314 | 4.481471188 | -9.703005193 | 1.69E-20 | 35.3994384  |
| ACTA2         | -0.846860306 | 5.680047981 | -9.698907141 | 1.74E-20 | 35.36602868 |
| ADARB1        | -0.432243526 | 1.6313009   | -9.696876798 | 1.77E-20 | 35.34947971 |
| RP11-498E2.9  | -0.259921236 | 0.427631942 | -9.695994464 | 1.79E-20 | 35.34228868 |
| SNX2          | -0.346934617 | 4.031006856 | -9.689145681 | 1.89E-20 | 35.28648628 |
| LGALS2        | -0.800782207 | 1.980073135 | -9.6781177   | 2.07E-20 | 35.19668916 |
| RP11-556E13.1 | -0.253231001 | 0.382226317 | -9.672921091 | 2.16E-20 | 35.1543991  |
| CTC-251I16.1  | -0.5755042   | 1.500102322 | -9.672898196 | 2.16E-20 | 35.15421282 |
| CACNA1C       | -0.269110266 | 0.580916363 | -9.66722229  | 2.26E-20 | 35.10804    |
| BANK1         | -0.542664407 | 1.546329584 | -9.66483709  | 2.31E-20 | 35.08864221 |
| CCDC69        | -0.681908106 | 3.183533488 | -9.657959209 | 2.44E-20 | 35.03272571 |
| GXYLT2        | -0.624832776 | 1.710354881 | -9.65384112  | 2.53E-20 | 34.99925905 |
| AC109642.1    | -0.471499977 | 0.858737045 | -9.649704446 | 2.61E-20 | 34.96565119 |
| AP002954.4    | -0.428926764 | 0.76263642  | -9.648656636 | 2.64E-20 | 34.95713995 |
| PDE6G         | -0.461616084 | 0.941098269 | -9.647387232 | 2.66E-20 | 34.94682958 |

|               |              |             |              |          |             |
|---------------|--------------|-------------|--------------|----------|-------------|
| IFI16         | -0.819641317 | 4.350590397 | -9.644411098 | 2.73E-20 | 34.92266043 |
| CLEC4E        | -0.605283204 | 1.161292452 | -9.643990177 | 2.74E-20 | 34.91924255 |
| TAP1          | -0.7906859   | 5.088652111 | -9.640321039 | 2.82E-20 | 34.88945342 |
| HLX           | -0.400463158 | 1.319373806 | -9.638234984 | 2.87E-20 | 34.87252054 |
| EMR4P         | -0.298605209 | 0.472958689 | -9.631915016 | 3.03E-20 | 34.82123555 |
| RAB32         | -0.637051903 | 4.109537974 | -9.629324117 | 3.09E-20 | 34.80021769 |
| SPRED1        | -0.555217347 | 3.304143682 | -9.628176915 | 3.12E-20 | 34.79091261 |
| ZBED2         | -0.665836328 | 1.324540782 | -9.627064193 | 3.15E-20 | 34.78188793 |
| RP11-405M12.4 | -0.276913729 | 0.667506853 | -9.615787088 | 3.45E-20 | 34.69046577 |
| ST8SIA4       | -0.691530207 | 2.333996435 | -9.615401914 | 3.46E-20 | 34.6873445  |
| TNFRSF4       | -0.545037912 | 1.997515956 | -9.613688912 | 3.51E-20 | 34.6734642  |
| CYSLTR1       | -0.539952296 | 1.129134075 | -9.612801035 | 3.54E-20 | 34.66627048 |
| LITAF         | -0.447004888 | 5.503445286 | -9.610583391 | 3.60E-20 | 34.64830477 |
| LINC01480     | -0.369715266 | 0.702002016 | -9.607762079 | 3.69E-20 | 34.62545269 |
| SGTB          | -0.3319236   | 1.557420395 | -9.589157601 | 4.29E-20 | 34.47487533 |
| OVOL2         | 0.532270971  | 2.437149004 | 9.581949502  | 4.55E-20 | 34.41658968 |
| HPS5          | -0.344018739 | 2.500041841 | -9.581605136 | 4.57E-20 | 34.41380584 |
| COL14A1       | -0.909523998 | 2.402671111 | -9.577943834 | 4.71E-20 | 34.38421233 |
| BGN           | -0.809673366 | 7.739243305 | -9.576231666 | 4.77E-20 | 34.37037592 |
| HSPE1P18      | -0.294096452 | 0.387314037 | -9.568876553 | 5.07E-20 | 34.31095693 |
| ZNF438        | -0.260566385 | 1.860056067 | -9.562653511 | 5.33E-20 | 34.26070803 |
| HGF           | -0.543849491 | 1.164598581 | -9.557452228 | 5.56E-20 | 34.21872674 |
| AC004988.1    | -0.223403289 | 0.305594278 | -9.551556935 | 5.84E-20 | 34.17116288 |
| LY75          | -0.472521259 | 1.42664543  | -9.550435939 | 5.89E-20 | 34.16212086 |
| ATP10D        | -0.448003058 | 1.802894082 | -9.549020369 | 5.96E-20 | 34.15070381 |
| RBP5          | -0.543105786 | 2.132902353 | -9.546016901 | 6.11E-20 | 34.12648372 |
| PALLD         | -0.675562862 | 3.78977013  | -9.540559549 | 6.38E-20 | 34.08248884 |
| BOC           | -0.338469263 | 0.699309025 | -9.538602455 | 6.49E-20 | 34.06671579 |
| IGKV1-17      | -1.588020877 | 5.147790133 | -9.531819946 | 6.86E-20 | 34.01206997 |
| DKK2          | -0.41315463  | 0.867001521 | -9.531789257 | 6.86E-20 | 34.01182277 |
| SNAI3         | -0.37411504  | 1.196342465 | -9.523892291 | 7.31E-20 | 33.94823185 |
| SLC36A1       | -0.40275497  | 1.763331748 | -9.51622507  | 7.78E-20 | 33.88652578 |
| LRRC15        | -1.043456885 | 1.965662088 | -9.515370012 | 7.84E-20 | 33.87964637 |

|          |              |             |              |          |             |
|----------|--------------|-------------|--------------|----------|-------------|
| CPNE5    | -0.630781482 | 1.611726786 | -9.511943243 | 8.06E-20 | 33.85208043 |
| TBX21    | -0.532477776 | 0.844191471 | -9.509402696 | 8.23E-20 | 33.83164795 |
| TRGV2    | -0.226673103 | 0.274436983 | -9.505813477 | 8.47E-20 | 33.80278789 |
| GZMB     | -0.998261019 | 2.658756404 | -9.498412179 | 9.00E-20 | 33.74329961 |
| ERAP1    | -0.529227849 | 3.46349488  | -9.492373302 | 9.45E-20 | 33.69478561 |
| APOE     | -1.03873991  | 6.751579328 | -9.491737995 | 9.50E-20 | 33.68968304 |
| AQP9     | -0.782023066 | 1.975056176 | -9.491257302 | 9.54E-20 | 33.68582243 |
| PRNP     | -0.590247436 | 5.046080482 | -9.486019792 | 9.95E-20 | 33.64376702 |
| ARRB2    | -0.415924779 | 3.767431215 | -9.483426788 | 1.02E-19 | 33.62295203 |
| TDO2     | -0.500191564 | 0.956317379 | -9.480434953 | 1.04E-19 | 33.59894038 |
| MYD88    | -0.391612025 | 4.255210777 | -9.478013396 | 1.06E-19 | 33.57950947 |
| TRBV7-4  | -0.226488003 | 0.24126138  | -9.476309151 | 1.08E-19 | 33.56583643 |
| DACT1    | -0.597786186 | 1.548777653 | -9.471888204 | 1.12E-19 | 33.53037543 |
| PRR33    | -0.363759753 | 0.556471069 | -9.467019241 | 1.16E-19 | 33.49133411 |
| GPR171   | -0.780101412 | 1.558159887 | -9.466892164 | 1.16E-19 | 33.49031534 |
| POPDC2   | -0.242869886 | 0.779627065 | -9.46238776  | 1.21E-19 | 33.45420994 |
| AIM1     | -0.803603564 | 2.801335119 | -9.459566988 | 1.23E-19 | 33.4316059  |
| UBASH3B  | -0.48066825  | 1.235533717 | -9.453935207 | 1.29E-19 | 33.38649002 |
| MEI1     | -0.542097226 | 1.166588043 | -9.452302472 | 1.31E-19 | 33.37341377 |
| ANTXR2   | -0.555462581 | 2.802526629 | -9.447143259 | 1.36E-19 | 33.33210495 |
| TBC1D4   | -0.460094303 | 2.217295231 | -9.441754183 | 1.42E-19 | 33.28897238 |
| FSTL1    | -0.739238667 | 4.549691934 | -9.440594805 | 1.44E-19 | 33.2796953  |
| CNR2     | -0.24561316  | 0.260493881 | -9.43871135  | 1.46E-19 | 33.26462601 |
| FRMD4A   | -0.284778616 | 0.967635233 | -9.429059373 | 1.58E-19 | 33.18743452 |
| MS4A14   | -0.343969565 | 0.630429786 | -9.422813132 | 1.66E-19 | 33.13750962 |
| FDCSP    | -1.295568655 | 2.15193893  | -9.420980433 | 1.68E-19 | 33.12286561 |
| EHD4     | -0.351718703 | 3.420642137 | -9.414629253 | 1.77E-19 | 33.07213244 |
| FMOD     | -0.780759571 | 4.289692384 | -9.414476678 | 1.78E-19 | 33.07091396 |
| C7       | -1.29290459  | 3.333778717 | -9.409582237 | 1.85E-19 | 33.03183391 |
| CYP2U1   | -0.360514948 | 1.353617261 | -9.407668725 | 1.88E-19 | 33.01655917 |
| ADPRH    | -0.421640829 | 2.065613613 | -9.403905542 | 1.93E-19 | 32.98652562 |
| LOX      | -0.785091547 | 2.801959658 | -9.402344556 | 1.96E-19 | 32.97407002 |
| IGHV3-11 | -1.576192098 | 5.612026365 | -9.400217589 | 1.99E-19 | 32.9571006  |

|              |              |             |              |          |             |
|--------------|--------------|-------------|--------------|----------|-------------|
| IGKV1-16     | -1.622625001 | 5.226345518 | -9.40009757  | 1.99E-19 | 32.95614314 |
| CCL8         | -0.889733813 | 1.779238365 | -9.398710586 | 2.02E-19 | 32.94507901 |
| SYK          | -0.554106651 | 3.668057635 | -9.397835048 | 2.03E-19 | 32.93809533 |
| ARL11        | -0.432348273 | 1.186614678 | -9.385774004 | 2.24E-19 | 32.84193727 |
| APOC2        | -0.229789205 | 0.288309972 | -9.385679185 | 2.24E-19 | 32.84118166 |
| RP11-367G6.3 | -0.267547206 | 0.448843379 | -9.384969545 | 2.25E-19 | 32.8355267  |
| RARRES3      | -1.066022628 | 5.58951916  | -9.381280953 | 2.32E-19 | 32.80613794 |
| GRB2         | -0.30239842  | 5.32408021  | -9.376555905 | 2.41E-19 | 32.76850304 |
| MDGA1        | -0.262124867 | 0.504562383 | -9.363187061 | 2.69E-19 | 32.66209227 |
| ADAMTSL4     | -0.685387489 | 2.080117743 | -9.352269506 | 2.93E-19 | 32.57527157 |
| SEMA7A       | -0.726437948 | 2.22885887  | -9.347381224 | 3.05E-19 | 32.53642099 |
| IGHV1-46     | -1.541506584 | 5.135128196 | -9.334773394 | 3.37E-19 | 32.43628347 |
| MFGE8        | -0.591306862 | 3.806780019 | -9.330600038 | 3.49E-19 | 32.40315751 |
| CLIC4        | -0.538665509 | 5.263838215 | -9.322793586 | 3.71E-19 | 32.34122177 |
| MAN1A1       | -0.667977772 | 3.7409453   | -9.321663092 | 3.75E-19 | 32.33225554 |
| SAMD9        | -0.683632509 | 2.280171304 | -9.319211693 | 3.82E-19 | 32.31281551 |
| EMR1         | -0.411186483 | 0.596545188 | -9.314042203 | 3.98E-19 | 32.27183228 |
| RAB30        | -0.344580714 | 1.170024762 | -9.308563405 | 4.16E-19 | 32.22841431 |
| RAB31        | -0.645371821 | 4.551032279 | -9.303977689 | 4.32E-19 | 32.19208756 |
| BLK          | -0.507680895 | 0.67372006  | -9.301503604 | 4.41E-19 | 32.17249378 |
| ADAMDEC1     | -1.003783943 | 2.030153491 | -9.294107463 | 4.67E-19 | 32.11394109 |
| MIR8071-2    | -1.033268788 | 2.157624204 | -9.290871231 | 4.80E-19 | 32.08833126 |
| RP5-887A10.1 | -0.481552951 | 0.627145263 | -9.286089646 | 4.98E-19 | 32.0505038  |
| TMEM86A      | -0.450842583 | 1.794879523 | -9.285097149 | 5.02E-19 | 32.0426538  |
| FCHSD2       | -0.365469055 | 3.227744795 | -9.28002028  | 5.23E-19 | 32.00250834 |
| SUSD6        | -0.458669323 | 4.096146632 | -9.276279871 | 5.39E-19 | 31.97294086 |
| TIMP3        | -0.641584956 | 1.599424562 | -9.267768105 | 5.77E-19 | 31.90568765 |
| TRAJ18       | -0.338107627 | 0.33080972  | -9.26581993  | 5.86E-19 | 31.89030084 |
| HIC1         | -0.341488567 | 1.08726563  | -9.265242507 | 5.89E-19 | 31.88574075 |
| ELTD1        | -0.504038853 | 2.417425386 | -9.262236882 | 6.03E-19 | 31.86200764 |
| TXNIP        | -0.784445734 | 7.393150241 | -9.258208975 | 6.23E-19 | 31.83021087 |
| ZC3H12D      | -0.324373786 | 0.716105116 | -9.248794818 | 6.72E-19 | 31.75593244 |
| IGJ          | -1.398818621 | 7.581180213 | -9.245322451 | 6.90E-19 | 31.72854865 |



|             |              |             |              |          |             |
|-------------|--------------|-------------|--------------|----------|-------------|
| ZBTB32      | -0.246032268 | 0.490899064 | -9.245010368 | 6.92E-19 | 31.72608786 |
| IGKV3-20    | -1.545560476 | 8.219514906 | -9.242985763 | 7.03E-19 | 31.71012514 |
| PRR5L       | -0.537862337 | 1.596697735 | -9.233017927 | 7.62E-19 | 31.63157112 |
| CILP        | -0.975939632 | 1.655022014 | -9.230176849 | 7.79E-19 | 31.60919225 |
| TDRD6       | -0.220458427 | 0.382465596 | -9.220278709 | 8.43E-19 | 31.53126369 |
| AMPD3       | -0.409481979 | 2.121242974 | -9.215909091 | 8.73E-19 | 31.49688028 |
| RP5-839B4.8 | -0.529479621 | 0.634632996 | -9.213354869 | 8.91E-19 | 31.4767871  |
| DEF6        | -0.501751454 | 3.493148156 | -9.201817803 | 9.76E-19 | 31.38607808 |
| AC006369.2  | -0.259899434 | 0.390615444 | -9.20141245  | 9.79E-19 | 31.3828925  |
| PPAPDC3     | -0.220999334 | 0.537799517 | -9.196816096 | 1.02E-18 | 31.34677766 |
| TGFBR2      | -0.629413127 | 5.115464015 | -9.196286566 | 1.02E-18 | 31.34261783 |
| ZFP36L2     | -0.552632004 | 5.478852515 | -9.194526248 | 1.03E-18 | 31.32879047 |
| SIGLEC17P   | -0.334376944 | 0.550428402 | -9.19051129  | 1.07E-18 | 31.29725985 |
| GPR25       | -0.322070478 | 0.488994812 | -9.190089348 | 1.07E-18 | 31.29394678 |
| CLEC4D      | -0.20835879  | 0.28417806  | -9.186845513 | 1.10E-18 | 31.26847997 |
| CRISPLD2    | -0.62509675  | 2.867547709 | -9.183409722 | 1.13E-18 | 31.2415131  |
| PDE1B       | -0.31389469  | 0.636763857 | -9.179189431 | 1.17E-18 | 31.20839862 |
| CD97        | -0.626331933 | 4.405893729 | -9.174137564 | 1.22E-18 | 31.16877339 |
| SMAP2       | -0.459522857 | 4.3605505   | -9.173729905 | 1.22E-18 | 31.16557652 |
| PRCP        | -0.415403746 | 2.983249146 | -9.172949121 | 1.23E-18 | 31.15945388 |
| OR52K3P     | -0.23885254  | 0.341107587 | -9.171319067 | 1.24E-18 | 31.14667272 |
| TMEM47      | -0.601143855 | 2.347069502 | -9.159243026 | 1.37E-18 | 31.05203552 |
| FHL1        | -0.822146552 | 2.327469277 | -9.156192574 | 1.40E-18 | 31.02814382 |
| KIAA1551    | -0.530338937 | 3.054164052 | -9.155124239 | 1.41E-18 | 31.01977776 |
| C2orf15     | 0.404538549  | 1.599493651 | 9.153872582  | 1.43E-18 | 31.00997701 |
| SOD2        | -0.635737613 | 4.45038248  | -9.151850245 | 1.45E-18 | 30.99414367 |
| BST1        | -0.508166841 | 1.550710225 | -9.151787703 | 1.45E-18 | 30.99365405 |
| LEF1        | -0.459604428 | 1.513862101 | -9.150458219 | 1.47E-18 | 30.98324661 |
| VNN2        | -0.651279157 | 1.500440978 | -9.149887568 | 1.47E-18 | 30.97877979 |
| KIRREL      | -0.617440933 | 2.652272349 | -9.149730066 | 1.48E-18 | 30.97754697 |
| CD7         | -0.748310548 | 2.321669531 | -9.148840225 | 1.49E-18 | 30.97058213 |
| STAC        | -0.614137697 | 1.191693366 | -9.144329382 | 1.54E-18 | 30.93528292 |
| IGHV4-28    | -1.255193032 | 3.391826377 | -9.142879919 | 1.56E-18 | 30.9239429  |

|               |              |             |              |          |             |
|---------------|--------------|-------------|--------------|----------|-------------|
| IL17RA        | -0.349535292 | 2.400904641 | -9.140710182 | 1.59E-18 | 30.90697013 |
| ANGPTL2       | -0.756432645 | 3.71184311  | -9.129928342 | 1.73E-18 | 30.82267172 |
| CEP85L        | -0.239394844 | 0.764088599 | -9.129683405 | 1.73E-18 | 30.82075748 |
| PDLIM2        | -0.36877322  | 1.461225491 | -9.126813252 | 1.77E-18 | 30.7983294  |
| MDFIC         | -0.606360747 | 3.432403727 | -9.122712459 | 1.83E-18 | 30.7662935  |
| MTA3          | 0.323753986  | 2.395952033 | 9.121752885  | 1.84E-18 | 30.75879867 |
| RP11-162J8.3  | -0.374032957 | 0.538080834 | -9.120816563 | 1.86E-18 | 30.75148599 |
| MOB3A         | -0.406046592 | 3.839683311 | -9.117571897 | 1.90E-18 | 30.72614928 |
| CD82          | -0.675601381 | 4.135838525 | -9.117464562 | 1.91E-18 | 30.72531124 |
| HLA-DPA3      | -0.49570117  | 0.780502065 | -9.115837649 | 1.93E-18 | 30.71260965 |
| RAP1A         | -0.336661194 | 3.889413949 | -9.114382492 | 1.95E-18 | 30.70125035 |
| VGLL3         | -0.57618045  | 1.345328568 | -9.111692138 | 1.99E-18 | 30.68025222 |
| RP11-10J5.1   | -0.266990405 | 0.302771023 | -9.110364422 | 2.02E-18 | 30.66989107 |
| OSM           | -0.718091873 | 1.688218966 | -9.105425494 | 2.10E-18 | 30.6313584  |
| WDFY4         | -0.594409742 | 1.426172975 | -9.10482509  | 2.11E-18 | 30.62667516 |
| HLA-A         | -0.687638845 | 9.054537051 | -9.104263287 | 2.11E-18 | 30.62229322 |
| MMP25         | -0.373412484 | 0.886238979 | -9.09466145  | 2.28E-18 | 30.54743083 |
| ATP6V0D2      | -0.543404802 | 0.935117018 | -9.089180034 | 2.38E-18 | 30.50471929 |
| LGALS1        | -0.812992718 | 7.414032437 | -9.067857859 | 2.82E-18 | 30.33875057 |
| MYL9          | -0.688604909 | 5.629867171 | -9.066568087 | 2.85E-18 | 30.32872011 |
| CXCR2P1       | -0.533331083 | 0.711078187 | -9.066011546 | 2.86E-18 | 30.32439225 |
| XAF1          | -0.552944902 | 1.468228656 | -9.062232642 | 2.95E-18 | 30.29501118 |
| GPR155        | -0.327606728 | 1.187921416 | -9.060626246 | 2.98E-18 | 30.28252406 |
| PLN           | -0.750919287 | 1.961324669 | -9.055779332 | 3.10E-18 | 30.24485678 |
| ICAM2         | -0.463619488 | 2.106937473 | -9.054722651 | 3.12E-18 | 30.23664681 |
| IGLV3-25      | -1.585882326 | 6.76882315  | -9.053984824 | 3.14E-18 | 30.23091461 |
| RP11-354E11.2 | -0.201596112 | 0.320268149 | -9.052637475 | 3.18E-18 | 30.22044789 |
| SLC2A6        | -0.51812476  | 1.851175963 | -9.051666566 | 3.20E-18 | 30.21290618 |
| PIEZO2        | -0.386607481 | 0.798618231 | -9.046765884 | 3.33E-18 | 30.17484811 |
| RILPL2        | -0.394644961 | 2.322696159 | -9.046379615 | 3.34E-18 | 30.17184902 |
| IL34          | -0.531142338 | 1.381251805 | -9.044015626 | 3.40E-18 | 30.15349642 |
| IQGAP2        | -0.624820558 | 1.778291889 | -9.040415961 | 3.50E-18 | 30.12555738 |
| CALCRL        | -0.609169597 | 2.409375228 | -9.038772805 | 3.54E-18 | 30.11280656 |

|                |              |             |              |          |             |
|----------------|--------------|-------------|--------------|----------|-------------|
| SULF2          | -0.721354597 | 2.985754156 | -9.037981841 | 3.56E-18 | 30.10666931 |
| COL3A1         | -1.095973057 | 7.763295993 | -9.036461592 | 3.61E-18 | 30.09487447 |
| IFIT3          | -0.758320952 | 4.03945133  | -9.034906056 | 3.65E-18 | 30.08280732 |
| C2CD4D         | 0.471738041  | 0.989936511 | 9.028580724  | 3.84E-18 | 30.03375361 |
| LAYN           | -0.580463365 | 1.85334928  | -9.028518255 | 3.84E-18 | 30.03326928 |
| RP11-1070N10.3 | -0.272334677 | 0.416461428 | -9.022433255 | 4.03E-18 | 29.98610286 |
| IGHV4-55       | -1.096587697 | 2.700655197 | -9.021869382 | 4.04E-18 | 29.98173329 |
| ROR2           | -0.499243011 | 1.256701151 | -9.014111587 | 4.30E-18 | 29.92166957 |
| CPQ            | -0.589940155 | 3.241924195 | -9.014019258 | 4.30E-18 | 29.92092138 |
| HSPB2          | -0.240967772 | 0.58269042  | -9.007025604 | 4.54E-18 | 29.86677625 |
| STAT1          | -0.694226856 | 5.791779806 | -9.001034959 | 4.76E-18 | 29.82042046 |
| ST6GALNAC5     | -0.554322398 | 1.272279918 | -8.997799791 | 4.88E-18 | 29.79539586 |
| MGAT1          | -0.351007168 | 5.042170445 | -8.996121876 | 4.95E-18 | 29.78241943 |
| TMOD2          | -0.307511584 | 0.977298041 | -8.995549049 | 4.97E-18 | 29.77798978 |
| 4-Sep          | -0.311958024 | 1.059351209 | -8.991400675 | 5.13E-18 | 29.7459166  |
| RP11-290F5.1   | -0.492382789 | 0.828216223 | -8.989872763 | 5.20E-18 | 29.73410622 |
| MYO1G          | -0.857839071 | 2.258768667 | -8.986452145 | 5.34E-18 | 29.70767093 |
| ADRB2          | -0.523242803 | 1.219024521 | -8.978055193 | 5.70E-18 | 29.64280814 |
| TRIM21         | -0.425598373 | 3.909086832 | -8.977303327 | 5.73E-18 | 29.63700244 |
| HDC            | -0.437016269 | 0.727942159 | -8.975338366 | 5.82E-18 | 29.62183119 |
| GSTP1          | 0.625801141  | 8.373886316 | 8.971702293  | 5.99E-18 | 29.59376378 |
| TEK            | -0.530287362 | 1.551339261 | -8.969939952 | 6.07E-18 | 29.58016294 |
| CCL21          | -1.110580746 | 5.03131305  | -8.969630689 | 6.09E-18 | 29.57777641 |
| DNM3OS         | -0.310338788 | 0.681165152 | -8.966235288 | 6.25E-18 | 29.55157855 |
| CADM3          | -0.499183482 | 0.746160435 | -8.961766611 | 6.47E-18 | 29.51711051 |
| IGKV4-1        | -1.598674677 | 7.87172045  | -8.961596127 | 6.48E-18 | 29.51579577 |
| IGLV1-44       | -1.495894012 | 6.539242101 | -8.958416741 | 6.64E-18 | 29.49128024 |
| ANTXR1         | -0.800582409 | 4.085353289 | -8.956452804 | 6.75E-18 | 29.4761399  |
| SCN7A          | -0.642714516 | 1.327527865 | -8.954919135 | 6.83E-18 | 29.46431824 |
| ZFPM2          | -0.315894702 | 0.763060055 | -8.954535309 | 6.85E-18 | 29.4613599  |
| C10orf10       | -0.733699229 | 5.022904015 | -8.954098732 | 6.87E-18 | 29.45799509 |
| TMEM255A       | -0.453601224 | 0.812340457 | -8.954095563 | 6.87E-18 | 29.45797067 |
| PPP3CC         | -0.319016151 | 2.501584561 | -8.952815058 | 6.94E-18 | 29.44810219 |

|              |              |             |              |          |             |
|--------------|--------------|-------------|--------------|----------|-------------|
| EDNRA        | -0.649157749 | 2.681044947 | -8.951525346 | 7.01E-18 | 29.43816378 |
| CDH23        | -0.212544059 | 0.373043247 | -8.95070134  | 7.06E-18 | 29.43181461 |
| IFI30        | -0.356369178 | 0.978602647 | -8.94969774  | 7.11E-18 | 29.42408219 |
| FLVCR2       | -0.493709894 | 2.02345882  | -8.946517792 | 7.29E-18 | 29.39958582 |
| LAG3         | -0.699096463 | 1.70663399  | -8.944179201 | 7.43E-18 | 29.38157476 |
| ARPC2        | -0.296613398 | 5.382263896 | -8.942733204 | 7.51E-18 | 29.37043987 |
| IGHV1-67     | -0.951237404 | 1.728828859 | -8.941211369 | 7.60E-18 | 29.35872238 |
| MAP3K14      | -0.467919015 | 2.117623198 | -8.939141    | 7.72E-18 | 29.34278374 |
| RP11-126O1.6 | -0.289364158 | 0.38280867  | -8.937305026 | 7.83E-18 | 29.32865181 |
| TNFAIP6      | -0.680074078 | 1.95281013  | -8.935730449 | 7.93E-18 | 29.31653357 |
| CFH          | -0.808838173 | 3.532546525 | -8.935187983 | 7.96E-18 | 29.31235902 |
| TPSB2        | -1.053252718 | 2.917267626 | -8.934449836 | 8.01E-18 | 29.30667888 |
| IDO1         | -1.139792779 | 3.094565092 | -8.931015863 | 8.23E-18 | 29.28025849 |
| KCNA3        | -0.614752385 | 1.264366816 | -8.923976209 | 8.69E-18 | 29.22611957 |
| CETP         | -0.288856494 | 0.84153291  | -8.919849302 | 8.98E-18 | 29.19439567 |
| RELT         | -0.381932192 | 1.548371073 | -8.919005946 | 9.03E-18 | 29.18791402 |
| HECA         | -0.402376768 | 2.898309552 | -8.90686858  | 9.93E-18 | 29.09468092 |
| IGHV4-61     | -1.301843897 | 3.020970075 | -8.904990815 | 1.01E-17 | 29.08026509 |
| SLFN5        | -0.581960546 | 3.463245578 | -8.902017883 | 1.03E-17 | 29.05744603 |
| ANGPTL1      | -0.349751859 | 0.640000318 | -8.8938589   | 1.10E-17 | 28.99484923 |
| DDO          | -0.485410525 | 1.090841812 | -8.892830704 | 1.11E-17 | 28.98696372 |
| LOXL1        | -0.644422017 | 2.975190256 | -8.890262763 | 1.13E-17 | 28.96727239 |
| AL928768.3   | -0.7146812   | 1.266215258 | -8.889181387 | 1.14E-17 | 28.95898148 |
| ZNF423       | -0.227992978 | 0.466068326 | -8.888733452 | 1.14E-17 | 28.95554737 |
| IL22RA2      | -0.420251947 | 0.516694315 | -8.887790045 | 1.15E-17 | 28.94831514 |
| REM1         | -0.309577971 | 0.77436894  | -8.885985689 | 1.17E-17 | 28.93448434 |
| PCDHGB7      | -0.302094021 | 0.733183793 | -8.881166985 | 1.21E-17 | 28.89755786 |
| TNFRSF17     | -0.830900181 | 1.790825672 | -8.879293497 | 1.23E-17 | 28.88320495 |
| THBS2        | -1.032602891 | 4.558041863 | -8.877613138 | 1.25E-17 | 28.87033349 |
| MRC2         | -0.701088065 | 4.136101846 | -8.876671684 | 1.26E-17 | 28.86312277 |
| TPST2        | -0.333998989 | 2.681371933 | -8.875619369 | 1.27E-17 | 28.8550636  |
| MS4A4E       | -0.233345313 | 0.380137744 | -8.875067031 | 1.27E-17 | 28.8508338  |
| IGFLR1       | -0.363137602 | 1.25792622  | -8.87464187  | 1.28E-17 | 28.84757805 |

|             |              |             |              |          |             |
|-------------|--------------|-------------|--------------|----------|-------------|
| ADAM8       | -0.803220753 | 3.637088646 | -8.874175395 | 1.28E-17 | 28.84400605 |
| MYCT1       | -0.453801109 | 1.756216244 | -8.8719503   | 1.30E-17 | 28.82696944 |
| STARD13     | -0.345359849 | 1.340263373 | -8.871596336 | 1.31E-17 | 28.82425958 |
| XCR1        | -0.274215214 | 0.426071933 | -8.870850007 | 1.31E-17 | 28.81854611 |
| EGR3        | -0.568904723 | 1.296852672 | -8.866247991 | 1.36E-17 | 28.78332344 |
| TCEAL7      | -0.395644403 | 1.044050727 | -8.865948058 | 1.36E-17 | 28.78102829 |
| HEPH        | -0.565427947 | 1.70698783  | -8.863769907 | 1.39E-17 | 28.7643623  |
| IGLV5-45    | -1.406606761 | 3.43564786  | -8.861464237 | 1.41E-17 | 28.74672386 |
| IGDCC4      | -0.275820857 | 0.547714856 | -8.860865816 | 1.42E-17 | 28.74214646 |
| SELP        | -0.562686719 | 1.511595896 | -8.856914656 | 1.46E-17 | 28.7119292  |
| VPREB3      | -0.772971029 | 1.646633424 | -8.853739886 | 1.50E-17 | 28.68765663 |
| IFI27L2     | -0.62299723  | 3.348670308 | -8.847676241 | 1.57E-17 | 28.64131485 |
| THY1        | -0.742491704 | 3.782556216 | -8.844780597 | 1.61E-17 | 28.61919287 |
| PCDHGC3     | -0.53197022  | 1.766181665 | -8.840401702 | 1.66E-17 | 28.58574922 |
| NFATC1      | -0.365420299 | 1.486971653 | -8.836562253 | 1.71E-17 | 28.55643548 |
| BHLHE40-AS1 | -0.236997808 | 0.724257919 | -8.830815187 | 1.79E-17 | 28.51257463 |
| UBA7        | -0.576291013 | 3.715606243 | -8.82574933  | 1.86E-17 | 28.47392991 |
| TRBV10-2    | -0.251749024 | 0.259266697 | -8.822375902 | 1.91E-17 | 28.44820478 |
| FPR2        | -0.409383739 | 0.693017429 | -8.820099634 | 1.94E-17 | 28.43085044 |
| POU2AF1     | -0.799068854 | 1.843487774 | -8.815357903 | 2.02E-17 | 28.3947098  |
| CHRD1       | -0.926629745 | 2.059210948 | -8.815255258 | 2.02E-17 | 28.39392762 |
| NAP1L3      | -0.350022477 | 0.779791389 | -8.814785502 | 2.03E-17 | 28.39034802 |
| CTB-133G6.1 | -0.259194767 | 0.439032731 | -8.81323975  | 2.05E-17 | 28.37857019 |
| IGHV1OR15-9 | -1.039498341 | 1.869621663 | -8.812325313 | 2.06E-17 | 28.37160336 |
| IFNG        | -0.498484967 | 0.64945375  | -8.811082893 | 2.08E-17 | 28.36213857 |
| CX3CR1      | -0.561742824 | 1.061182075 | -8.805088409 | 2.18E-17 | 28.31648609 |
| OAF         | -0.538108098 | 2.610019936 | -8.804814785 | 2.19E-17 | 28.31440278 |
| IGKV1-8     | -1.217551519 | 2.696335054 | -8.804171926 | 2.20E-17 | 28.30950838 |
| IFIT2       | -0.648001986 | 2.735900001 | -8.803868723 | 2.20E-17 | 28.30720004 |
| MIR4420     | -0.360383252 | 0.470141568 | -8.803512621 | 2.21E-17 | 28.30448905 |
| INHBA       | -0.789822205 | 2.572738481 | -8.802573968 | 2.23E-17 | 28.29734349 |
| CORO1C      | -0.453936185 | 4.396154248 | -8.799233132 | 2.28E-17 | 28.27191566 |
| RN7SL138P   | -0.455129231 | 1.333916632 | -8.798878183 | 2.29E-17 | 28.26921448 |

|                |              |             |              |          |             |
|----------------|--------------|-------------|--------------|----------|-------------|
| CLEC11A        | -0.582791903 | 2.957706488 | -8.798503176 | 2.30E-17 | 28.26636075 |
| WISP2          | -0.583010452 | 1.487883947 | -8.798062722 | 2.31E-17 | 28.26300908 |
| LBH            | -0.628210044 | 4.882661548 | -8.787506846 | 2.50E-17 | 28.18272011 |
| MSL3           | -0.269388403 | 2.489590219 | -8.783140011 | 2.59E-17 | 28.14952614 |
| IGLV2-18       | -1.319626528 | 3.131092959 | -8.781717767 | 2.61E-17 | 28.13871773 |
| IGHV3-15       | -1.47080913  | 6.131669183 | -8.779594138 | 2.66E-17 | 28.12258148 |
| CD70           | -0.452757885 | 0.720067714 | -8.778734579 | 2.68E-17 | 28.116051   |
| CMTM3          | -0.63354878  | 4.105859201 | -8.776986737 | 2.71E-17 | 28.10277324 |
| C6orf136       | 0.400168861  | 2.99351946  | 8.775043534  | 2.75E-17 | 28.08801365 |
| PNRC1          | -0.356369742 | 4.994753961 | -8.768622674 | 2.89E-17 | 28.03926103 |
| TCF21          | -0.560190327 | 1.043550589 | -8.761642684 | 3.05E-17 | 27.98629264 |
| TIMD4          | -0.35255406  | 0.542346034 | -8.759500183 | 3.10E-17 | 27.97004023 |
| CYYR1          | -0.469737751 | 2.134276368 | -8.749326755 | 3.35E-17 | 27.8929072  |
| ABCA1          | -0.547748346 | 2.46034595  | -8.748270087 | 3.38E-17 | 27.8848995  |
| EMR2           | -0.467300225 | 1.144070321 | -8.745795428 | 3.45E-17 | 27.86614868 |
| RP11-325F22.2  | -0.349140356 | 0.640079468 | -8.741212291 | 3.57E-17 | 27.8314319  |
| RP11-147L13.15 | -0.334721783 | 1.158179054 | -8.738601719 | 3.64E-17 | 27.81166306 |
| HAAO           | -0.378270783 | 1.41021256  | -8.73754813  | 3.67E-17 | 27.80368587 |
| DKK3           | -0.724346916 | 3.781646654 | -8.737276968 | 3.68E-17 | 27.80163289 |
| TUBB6          | -0.651264045 | 3.496517526 | -8.73557108  | 3.73E-17 | 27.78871864 |
| LINC00968      | -0.217459215 | 0.295092179 | -8.734659868 | 3.75E-17 | 27.78182116 |
| IGHV3-74       | -1.398523877 | 5.157605044 | -8.731837693 | 3.83E-17 | 27.76046186 |
| CAPZB          | -0.290593582 | 6.198047285 | -8.731770832 | 3.84E-17 | 27.75995589 |
| FCRL5          | -0.555667466 | 0.969651241 | -8.730930062 | 3.86E-17 | 27.75359364 |
| IRF2           | -0.285341594 | 3.912772461 | -8.729687278 | 3.90E-17 | 27.7441901  |
| GRTP1          | 0.514167189  | 2.420469478 | 8.726860891  | 3.98E-17 | 27.72280785 |
| IGKJ5          | -1.28337377  | 3.17825593  | -8.726771346 | 3.99E-17 | 27.72213051 |
| TRBV5-5        | -0.266261928 | 0.307700138 | -8.719462207 | 4.22E-17 | 27.66685924 |
| PDE5A          | -0.402911717 | 1.499547199 | -8.719408012 | 4.22E-17 | 27.66644955 |
| KIAA0040       | -0.426962164 | 3.403113069 | -8.715406421 | 4.35E-17 | 27.63620429 |
| NLRP1          | -0.537216603 | 1.691184755 | -8.711873218 | 4.47E-17 | 27.60950773 |
| ADAM12         | -0.740926145 | 1.642979554 | -8.710033277 | 4.53E-17 | 27.59560845 |
| IFNAR2         | -0.435042032 | 2.929156363 | -8.709830533 | 4.54E-17 | 27.59407701 |

|               |              |             |              |          |             |
|---------------|--------------|-------------|--------------|----------|-------------|
| AC093818.1    | -0.252182276 | 0.692053607 | -8.700131755 | 4.89E-17 | 27.5208474  |
| CCL11         | -0.707179806 | 1.331189513 | -8.69776389  | 4.98E-17 | 27.5029782  |
| FAM65B        | -0.563273508 | 1.484986844 | -8.696342184 | 5.03E-17 | 27.49225094 |
| SERPINF1      | -0.856582243 | 5.195845698 | -8.696266102 | 5.04E-17 | 27.49167691 |
| IGHV3-52      | -0.75009414  | 1.271567083 | -8.692773608 | 5.17E-17 | 27.46533049 |
| AKAP7         | -0.300650195 | 1.113015131 | -8.691503743 | 5.22E-17 | 27.45575291 |
| NOL7          | 0.284021809  | 4.788971573 | 8.683576168  | 5.55E-17 | 27.39598477 |
| IGHV3-30      | -1.426106075 | 5.999895606 | -8.677633102 | 5.81E-17 | 27.35120471 |
| NELFA         | 0.325625132  | 2.915563592 | 8.677206459  | 5.82E-17 | 27.34799089 |
| IFIH1         | -0.570119834 | 3.102662118 | -8.67709528  | 5.83E-17 | 27.34715342 |
| LHFP          | -0.533256766 | 3.580310053 | -8.671548599 | 6.08E-17 | 27.30538232 |
| IGHV3-71      | -0.830184119 | 1.501470299 | -8.67104681  | 6.10E-17 | 27.3016044  |
| DYSF          | -0.559761374 | 2.380877404 | -8.6697992   | 6.16E-17 | 27.29221197 |
| IGHV2-5       | -1.39940328  | 3.681121009 | -8.668779163 | 6.21E-17 | 27.28453354 |
| IGHGP         | -1.356297614 | 5.359939905 | -8.661141116 | 6.58E-17 | 27.22705845 |
| RASGRP1       | -0.541473193 | 1.77357556  | -8.657323003 | 6.78E-17 | 27.19834175 |
| RP11-812E19.9 | -0.812232546 | 1.292474733 | -8.657108624 | 6.79E-17 | 27.19672964 |
| TOX2          | -0.525417918 | 1.548206465 | -8.656189271 | 6.84E-17 | 27.18981655 |
| SLFN11        | -0.655970384 | 2.963238325 | -8.655512387 | 6.87E-17 | 27.18472706 |
| SNORA14       | -0.239278977 | 0.283003725 | -8.652544401 | 7.03E-17 | 27.16241421 |
| GGT5          | -0.638731888 | 2.863401984 | -8.651786704 | 7.07E-17 | 27.15671886 |
| ERG           | -0.411251046 | 1.563374511 | -8.649354937 | 7.20E-17 | 27.1384426  |
| IGLV4-69      | -1.525525771 | 5.345871711 | -8.648507077 | 7.25E-17 | 27.1320713  |
| PARP15        | -0.530330082 | 1.178306534 | -8.641244836 | 7.66E-17 | 27.07751751 |
| FCER2         | -0.415944102 | 0.460198498 | -8.640073851 | 7.73E-17 | 27.06872426 |
| EPS15         | -0.26017587  | 3.475551189 | -8.638912319 | 7.80E-17 | 27.06000287 |
| KLF12         | -0.335568721 | 0.978393599 | -8.6371487   | 7.90E-17 | 27.04676234 |
| GPR114        | -0.428311972 | 0.870344228 | -8.63091107  | 8.29E-17 | 26.99994881 |
| THBS1         | -0.881124764 | 4.945349731 | -8.629270673 | 8.39E-17 | 26.98764175 |
| SPNS3         | -0.278430817 | 0.597617812 | -8.618671751 | 9.09E-17 | 26.9081651  |
| IGHV5-51      | -1.517377096 | 6.940633771 | -8.617373628 | 9.19E-17 | 26.89843601 |
| IGKV1-6       | -1.405032723 | 4.876661535 | -8.615701484 | 9.30E-17 | 26.88590533 |
| SH3BGRL3      | -0.487410034 | 6.834566731 | -8.614311092 | 9.40E-17 | 26.8754874  |

|           |              |             |              |          |             |
|-----------|--------------|-------------|--------------|----------|-------------|
| TSPAN18   | -0.507466047 | 1.805689228 | -8.608188282 | 9.85E-17 | 26.82962522 |
| JAK1      | -0.396366378 | 4.790311635 | -8.607324815 | 9.91E-17 | 26.82315946 |
| IGHJ3     | -1.3688047   | 4.687091322 | -8.60448502  | 1.01E-16 | 26.80189808 |
| COL16A1   | -0.630977904 | 2.597346976 | -8.598118242 | 1.06E-16 | 26.75424925 |
| RAB3IL1   | -0.481835284 | 2.13293801  | -8.59097691  | 1.12E-16 | 26.70083475 |
| IGHG2     | -1.409363581 | 8.358242596 | -8.585875594 | 1.17E-16 | 26.66269894 |
| WBP1L     | -0.291530781 | 4.232170892 | -8.582207885 | 1.20E-16 | 26.63529069 |
| BATF2     | -0.645360858 | 2.510891835 | -8.58188096  | 1.20E-16 | 26.63284805 |
| C1QTNF7   | -0.385132002 | 0.623440732 | -8.573883305 | 1.28E-16 | 26.57311453 |
| IGHV3-49  | -1.492464695 | 4.997599723 | -8.573485952 | 1.28E-16 | 26.57014783 |
| TNFRSF13B | -0.350097494 | 0.469742739 | -8.570380262 | 1.31E-16 | 26.54696374 |
| LACC1     | -0.336012521 | 1.564885774 | -8.568824485 | 1.33E-16 | 26.53535215 |
| PTPLAD2   | -0.403027054 | 1.589863564 | -8.568783622 | 1.33E-16 | 26.53504719 |
| ZNF671    | -0.384108281 | 1.445668683 | -8.567520706 | 1.34E-16 | 26.52562256 |
| STK17A    | -0.527556834 | 3.516856833 | -8.563135855 | 1.39E-16 | 26.49290819 |
| TMEM204   | -0.505076499 | 3.108937485 | -8.561551165 | 1.40E-16 | 26.48108824 |
| SIGLEC6   | -0.322106813 | 0.441016225 | -8.559020343 | 1.43E-16 | 26.46221461 |
| LINC01010 | -0.208244107 | 0.253815796 | -8.558445087 | 1.44E-16 | 26.45792521 |
| DNASE2B   | -0.341486735 | 0.430380479 | -8.547591788 | 1.56E-16 | 26.37703766 |
| SFXN3     | -0.521866485 | 3.809318287 | -8.547028226 | 1.56E-16 | 26.37283962 |
| IGLV7-43  | -1.342481187 | 3.896739445 | -8.546998473 | 1.57E-16 | 26.37261799 |
| PLCB2     | -0.593968269 | 2.332803177 | -8.538233228 | 1.67E-16 | 26.30735133 |
| IGKV1-5   | -1.476302343 | 7.513218889 | -8.537602908 | 1.68E-16 | 26.30265985 |
| TRBJ2-2   | -0.508122434 | 0.756247127 | -8.533058299 | 1.74E-16 | 26.26884181 |
| MMRN1     | -0.542894446 | 1.202834488 | -8.531830619 | 1.75E-16 | 26.25970851 |
| CYBRD1    | -0.779938713 | 4.402023262 | -8.531767684 | 1.76E-16 | 26.25924033 |
| CYB561A3  | -0.270635732 | 2.223114169 | -8.525423538 | 1.84E-16 | 26.21205901 |
| FXVD5     | -0.700604563 | 4.984268702 | -8.524425838 | 1.86E-16 | 26.20464151 |
| IGLV3-9   | -1.476325141 | 4.1060755   | -8.522276111 | 1.89E-16 | 26.18866135 |
| FAT4      | -0.388734277 | 0.895779932 | -8.52185071  | 1.89E-16 | 26.18549945 |
| NFKB1     | -0.361906139 | 3.594661121 | -8.518287074 | 1.94E-16 | 26.15901646 |
| IGHV1-58  | -1.344491618 | 2.931870102 | -8.512959123 | 2.02E-16 | 26.11943744 |
| RASGRF2   | -0.333979987 | 0.916629086 | -8.507463125 | 2.11E-16 | 26.0786294  |



|               |              |             |              |          |             |
|---------------|--------------|-------------|--------------|----------|-------------|
| CASP4         | -0.454897466 | 3.595475875 | -8.506908371 | 2.12E-16 | 26.07451141 |
| CYR61         | -0.845334259 | 5.863852162 | -8.50623434  | 2.13E-16 | 26.06950829 |
| MZB1          | -1.116506422 | 3.710095074 | -8.501896005 | 2.20E-16 | 26.03731328 |
| LIMD2         | -0.585461972 | 2.803550745 | -8.501070363 | 2.21E-16 | 26.03118754 |
| NAGK          | -0.295286565 | 3.007274567 | -8.494190195 | 2.33E-16 | 25.98015826 |
| SDC3          | -0.553080316 | 4.06361091  | -8.485921984 | 2.48E-16 | 25.91887482 |
| GHRL          | -0.232903359 | 0.490719375 | -8.485273389 | 2.49E-16 | 25.91406936 |
| MYO9B         | -0.406401069 | 3.47417102  | -8.481692819 | 2.56E-16 | 25.88754574 |
| IGLV3-19      | -1.55111812  | 7.032499527 | -8.480701178 | 2.58E-16 | 25.88020149 |
| NFKBIE        | -0.451035324 | 3.498236953 | -8.477236666 | 2.65E-16 | 25.85454778 |
| TRAJ3         | -0.401240029 | 0.467508797 | -8.474866844 | 2.69E-16 | 25.83700444 |
| RNF166        | -0.38568615  | 2.568328558 | -8.470773257 | 2.78E-16 | 25.80670903 |
| SH2D2A        | -0.503026842 | 1.858262096 | -8.466441596 | 2.87E-16 | 25.77466361 |
| COL1A2        | -0.954603526 | 6.942505468 | -8.465782094 | 2.88E-16 | 25.76978573 |
| CAMK1         | -0.329102843 | 1.588827607 | -8.461440963 | 2.98E-16 | 25.73768441 |
| GPT2          | 0.821899781  | 3.218392666 | 8.460770207  | 2.99E-16 | 25.73272547 |
| IGHV3OR16-9   | -0.83615437  | 1.523796634 | -8.456668682 | 3.09E-16 | 25.70240907 |
| MAP3K7CL      | -0.304559298 | 1.186018208 | -8.455422537 | 3.12E-16 | 25.69320037 |
| IGKV3D-20     | -1.270617203 | 3.707965022 | -8.45454116  | 3.14E-16 | 25.68668783 |
| FLNA          | -0.722923509 | 6.533133879 | -8.453599747 | 3.16E-16 | 25.67973224 |
| MICB          | -0.557636025 | 2.197576038 | -8.452921223 | 3.18E-16 | 25.67471935 |
| CLCN2         | 0.35056618   | 1.568709022 | 8.449522066  | 3.26E-16 | 25.64961115 |
| FAM129C       | -0.277046132 | 0.317877553 | -8.448063546 | 3.29E-16 | 25.63883997 |
| CTD-2547L24.3 | -0.314639621 | 0.654068224 | -8.447125381 | 3.32E-16 | 25.63191235 |
| IGHV3OR16-13  | -0.853726258 | 1.525750874 | -8.442906696 | 3.42E-16 | 25.60076775 |
| ABCB6         | 0.479030311  | 1.419438463 | 8.441402798  | 3.46E-16 | 25.58966798 |
| CCDC102B      | -0.312771206 | 1.130530493 | -8.437977558 | 3.55E-16 | 25.56439296 |
| IGHV3-23      | -1.366143511 | 7.293754733 | -8.437813303 | 3.56E-16 | 25.5631811  |
| SLC16A2       | -0.562080472 | 2.100434364 | -8.433354806 | 3.68E-16 | 25.53029361 |
| SFRP4         | -1.055150834 | 3.702936113 | -8.431831248 | 3.72E-16 | 25.51905828 |
| MARCKS        | -0.557986406 | 5.167741647 | -8.429104588 | 3.79E-16 | 25.49895458 |
| LPPR4         | -0.320722894 | 0.643803209 | -8.427958604 | 3.83E-16 | 25.49050667 |
| STK17B        | -0.465188982 | 3.796397358 | -8.421025604 | 4.03E-16 | 25.43941672 |

|                |              |             |              |          |             |
|----------------|--------------|-------------|--------------|----------|-------------|
| IGKV1D-8       | -1.030965704 | 2.2155764   | -8.420197437 | 4.06E-16 | 25.43331599 |
| PML            | -0.446299209 | 3.121560256 | -8.418609056 | 4.10E-16 | 25.42161635 |
| PRICKLE1       | -0.331130783 | 0.839084231 | -8.416870657 | 4.16E-16 | 25.40881362 |
| CSTA           | -0.768761895 | 2.436526355 | -8.415677003 | 4.20E-16 | 25.40002389 |
| ST8SIA1        | -0.217640128 | 0.384124052 | -8.415383616 | 4.20E-16 | 25.39786362 |
| RP11-493L12.4  | -0.250265662 | 0.497319582 | -8.414572816 | 4.23E-16 | 25.39189382 |
| SGIP1          | -0.218337325 | 0.526450034 | -8.414278581 | 4.24E-16 | 25.38972752 |
| CSDC2          | -0.423120922 | 1.166155692 | -8.412698594 | 4.29E-16 | 25.37809584 |
| SGCA           | -0.540083354 | 1.276501098 | -8.411196668 | 4.34E-16 | 25.36704036 |
| NAGA           | -0.33160728  | 4.236032988 | -8.410207823 | 4.37E-16 | 25.35976241 |
| OAS2           | -0.744225844 | 3.521826936 | -8.406464595 | 4.49E-16 | 25.33221787 |
| RP4-753P9.3    | -0.276888907 | 0.656045004 | -8.405070073 | 4.54E-16 | 25.32195864 |
| IGKV3OR2-268   | -0.950058205 | 1.945054104 | -8.403191655 | 4.60E-16 | 25.30814148 |
| MGP            | -0.868337024 | 5.952212771 | -8.403092404 | 4.61E-16 | 25.30741148 |
| IGLV2-14       | -1.438571603 | 7.376467461 | -8.403041234 | 4.61E-16 | 25.30703512 |
| NELL2          | -0.483407563 | 0.955068344 | -8.402110849 | 4.64E-16 | 25.30019241 |
| TRIM14         | -0.463760023 | 3.349234894 | -8.398898205 | 4.75E-16 | 25.2765687  |
| IGLV3-21       | -1.52900637  | 6.938294511 | -8.39838434  | 4.77E-16 | 25.2727907  |
| OGN            | -0.664159674 | 1.076054391 | -8.393948095 | 4.93E-16 | 25.24018206 |
| MSN            | -0.557198479 | 6.65509101  | -8.38888173  | 5.12E-16 | 25.20295755 |
| IFNG-AS1       | -0.234986914 | 0.269211396 | -8.388072685 | 5.15E-16 | 25.19701476 |
| GNG8           | -0.289646624 | 0.570038459 | -8.387605342 | 5.17E-16 | 25.19358211 |
| SYDE1          | -0.443829094 | 1.977474895 | -8.387272963 | 5.18E-16 | 25.19114086 |
| IGHV3-53       | -1.242672052 | 3.817034788 | -8.384407703 | 5.30E-16 | 25.17009922 |
| RP11-1166P10.8 | -0.773451766 | 1.417071545 | -8.383530335 | 5.33E-16 | 25.16365716 |
| LRCH1          | -0.328440531 | 1.917515515 | -8.381119744 | 5.43E-16 | 25.14596005 |
| IGKV3-11       | -1.361963814 | 7.398602328 | -8.380563608 | 5.45E-16 | 25.14187777 |
| FAM180A        | -0.309097946 | 0.50472794  | -8.379383891 | 5.50E-16 | 25.13321883 |
| POSTN          | -0.938125724 | 5.170943028 | -8.377779557 | 5.56E-16 | 25.12144473 |
| RP5-1171I10.5  | -0.564327249 | 1.05879529  | -8.371041871 | 5.85E-16 | 25.0720158  |
| PKD2           | -0.432065937 | 2.720347509 | -8.363719021 | 6.18E-16 | 25.01832792 |
| IGHV1-18       | -1.474356417 | 6.698011097 | -8.362467122 | 6.24E-16 | 25.0091531  |
| CHI3L1         | -1.189857097 | 4.75611068  | -8.361745016 | 6.27E-16 | 25.00386145 |

|               |              |             |              |          |             |
|---------------|--------------|-------------|--------------|----------|-------------|
| SNRK          | -0.304969114 | 2.626466489 | -8.360469502 | 6.33E-16 | 24.99451522 |
| CXorf36       | -0.386865145 | 1.468766938 | -8.360078149 | 6.35E-16 | 24.99164783 |
| ARRDC4        | -0.55734032  | 2.587174287 | -8.358185589 | 6.44E-16 | 24.97778272 |
| STON1         | -0.306253854 | 0.993318617 | -8.358114467 | 6.44E-16 | 24.97726172 |
| PNOC          | -0.43690411  | 0.783830586 | -8.356142204 | 6.54E-16 | 24.9628153  |
| KIF17         | -0.220587068 | 0.524520653 | -8.351795414 | 6.75E-16 | 24.93098503 |
| APOL2         | -0.513067275 | 4.012773943 | -8.345480722 | 7.07E-16 | 24.88476661 |
| AC093850.2    | -0.762479466 | 1.553824472 | -8.343979061 | 7.15E-16 | 24.87377955 |
| BLNK          | -0.454611356 | 1.964393013 | -8.342861327 | 7.21E-16 | 24.8656025  |
| TIE1          | -0.483328978 | 2.168745449 | -8.339274296 | 7.41E-16 | 24.83936628 |
| SEMA4D        | -0.373025055 | 2.213151206 | -8.329656927 | 7.95E-16 | 24.76906503 |
| OPTN          | -0.453191924 | 4.021046773 | -8.325999737 | 8.17E-16 | 24.74234768 |
| RP11-291B21.2 | -0.664544023 | 1.005106752 | -8.325938952 | 8.18E-16 | 24.7419037  |
| IGKV1OR2-6    | -0.950433379 | 1.631007386 | -8.315211465 | 8.85E-16 | 24.6635863  |
| KLRK1         | -0.204680977 | 0.281212963 | -8.31491115  | 8.87E-16 | 24.66139491 |
| ECSCR         | -0.410536731 | 1.820942135 | -8.31457392  | 8.89E-16 | 24.65893422 |
| CTC-231O11.1  | -0.438762043 | 0.742242418 | -8.31251243  | 9.03E-16 | 24.64389365 |
| PLAU          | -1.096301873 | 5.224925673 | -8.304737203 | 9.57E-16 | 24.58719118 |
| KIAA0125      | -0.397545761 | 0.610643098 | -8.300670325 | 9.86E-16 | 24.55754859 |
| ESRP1         | 0.473195772  | 4.608076534 | 8.300549918  | 9.87E-16 | 24.55667113 |
| RP11-284N8.3  | -0.742260844 | 1.785661742 | -8.295766962 | 1.02E-15 | 24.52182363 |
| HAS2          | -0.538651164 | 1.259289852 | -8.293529234 | 1.04E-15 | 24.50552528 |
| RP11-701P16.5 | -0.294663606 | 0.482641536 | -8.292927194 | 1.04E-15 | 24.50114093 |
| TRIM69        | -0.404636854 | 2.245347895 | -8.291963823 | 1.05E-15 | 24.49412568 |
| IGHV3-19      | -0.776099518 | 1.440938506 | -8.291556281 | 1.05E-15 | 24.49115816 |
| UBE2E2        | -0.448122863 | 2.768413082 | -8.289648228 | 1.07E-15 | 24.4772661  |
| ADAMTS12      | -0.605479818 | 1.727622255 | -8.287993871 | 1.08E-15 | 24.4652231  |
| PEAK1         | -0.324522756 | 1.476397178 | -8.284252816 | 1.11E-15 | 24.43799655 |
| FAM101B       | -0.463906011 | 2.472448032 | -8.281799396 | 1.13E-15 | 24.42014616 |
| GPBAR1        | -0.211545404 | 0.448479227 | -8.281637367 | 1.13E-15 | 24.41896742 |
| TMEM51        | -0.488138839 | 3.686530539 | -8.281185161 | 1.14E-15 | 24.41567778 |
| IGLV2-8       | -1.377190577 | 5.073618769 | -8.279287978 | 1.15E-15 | 24.40187794 |
| IGHV1-69-2    | -1.523373526 | 5.411171316 | -8.277934855 | 1.17E-15 | 24.39203697 |

|               |              |             |              |          |             |
|---------------|--------------|-------------|--------------|----------|-------------|
| DERL3         | -0.813677608 | 3.229290976 | -8.277056943 | 1.17E-15 | 24.38565276 |
| IGLV1-40      | -1.380703991 | 7.35433828  | -8.275820188 | 1.18E-15 | 24.3766599  |
| IGLV2-23      | -1.418137043 | 6.910224757 | -8.274372264 | 1.20E-15 | 24.36613285 |
| AC116366.6    | -0.28773932  | 0.69501904  | -8.265526851 | 1.28E-15 | 24.30185307 |
| CCDC50        | -0.381750003 | 2.678159575 | -8.260282917 | 1.33E-15 | 24.2637699  |
| PCOLCE        | -0.693237316 | 4.233827759 | -8.252757992 | 1.40E-15 | 24.20915343 |
| RP11-322E11.5 | -0.240244756 | 0.502714233 | -8.250355807 | 1.43E-15 | 24.19172614 |
| LOXL3         | -0.359618169 | 1.403773809 | -8.250219038 | 1.43E-15 | 24.19073402 |
| EPHB6         | -0.549182626 | 0.983672141 | -8.246523504 | 1.47E-15 | 24.16393164 |
| UBE2J1        | -0.3348834   | 4.581435676 | -8.245727842 | 1.48E-15 | 24.15816217 |
| MRPS9         | 0.277316584  | 3.749057493 | 8.242957836  | 1.51E-15 | 24.13807976 |
| IGKV1D-39     | -1.037176918 | 1.546556878 | -8.241939796 | 1.52E-15 | 24.1307003  |
| IGKC          | -1.38663924  | 9.800009284 | -8.23682669  | 1.58E-15 | 24.09364743 |
| ARSI          | -0.401458373 | 1.092528748 | -8.235382383 | 1.60E-15 | 24.08318421 |
| TNFSF10       | -0.789010841 | 4.998384518 | -8.230754299 | 1.65E-15 | 24.04966564 |
| IGHV3-48      | -1.314900226 | 4.070129306 | -8.229201966 | 1.67E-15 | 24.03842619 |
| IGHV3-62      | -0.608446984 | 0.968547732 | -8.22914486  | 1.67E-15 | 24.03801276 |
| KAL1          | -0.692287979 | 2.195919861 | -8.222411632 | 1.75E-15 | 23.98928063 |
| SNAI2         | -0.68787085  | 2.197680687 | -8.219769742 | 1.79E-15 | 23.97016807 |
| IGKV3-15      | -1.357209432 | 6.252110455 | -8.218902436 | 1.80E-15 | 23.96389464 |
| ITGB2-AS1     | -0.647898467 | 1.469482668 | -8.218302697 | 1.81E-15 | 23.95955687 |
| KCNN3         | -0.296342864 | 0.65986059  | -8.213347404 | 1.88E-15 | 23.92372563 |
| CTSC          | -0.536083631 | 4.759645842 | -8.205807342 | 1.98E-15 | 23.86923571 |
| NABP1         | -0.446949109 | 1.762011078 | -8.204497743 | 2.00E-15 | 23.85977548 |
| TMEM109       | -0.335081311 | 5.599316459 | -8.204288345 | 2.00E-15 | 23.85826295 |
| RP11-212I21.2 | -0.425160646 | 0.652921324 | -8.20405709  | 2.01E-15 | 23.85659257 |
| IGHJ2         | -1.29250028  | 3.682427187 | -8.203785411 | 2.01E-15 | 23.85463025 |
| MIR7848       | -0.346651861 | 0.503076676 | -8.199992836 | 2.07E-15 | 23.8272419  |
| ANKRD22       | -0.888423009 | 3.116451731 | -8.198675738 | 2.09E-15 | 23.81773264 |
| MCEMP1        | -0.920622651 | 1.909999811 | -8.198599837 | 2.09E-15 | 23.81718467 |
| RP11-588K22.2 | -0.541653406 | 2.557531678 | -8.195917894 | 2.13E-15 | 23.79782515 |
| IGHV3-21      | -1.413949947 | 6.001235921 | -8.191702132 | 2.20E-15 | 23.76740355 |
| RP13-297E16.4 | -0.363256388 | 0.616098414 | -8.190390998 | 2.22E-15 | 23.75794464 |

|            |              |             |              |          |             |
|------------|--------------|-------------|--------------|----------|-------------|
| PCDH18     | -0.342984502 | 1.106975697 | -8.187620981 | 2.26E-15 | 23.73796468 |
| LY96       | -0.604606563 | 4.29792439  | -8.187177788 | 2.27E-15 | 23.73476844 |
| CCL14      | -0.300991013 | 0.45038176  | -8.187147062 | 2.27E-15 | 23.73454685 |
| IGHV4-59   | -1.41323774  | 5.91809139  | -8.186739417 | 2.28E-15 | 23.73160709 |
| KLF6       | -0.525163684 | 4.696365534 | -8.186528032 | 2.28E-15 | 23.73008273 |
| THSD1      | -0.336864443 | 1.13588363  | -8.184199938 | 2.32E-15 | 23.71329602 |
| UNC5B      | -0.538371915 | 2.775198525 | -8.182128637 | 2.36E-15 | 23.69836399 |
| NKD2       | -0.620283733 | 2.046591947 | -8.178040822 | 2.43E-15 | 23.66890331 |
| TBC1D9     | -0.412135058 | 3.147635553 | -8.177303889 | 2.44E-15 | 23.66359347 |
| AC002331.1 | -0.548567521 | 0.897584816 | -8.176842902 | 2.45E-15 | 23.66027209 |
| PCED1B     | -0.575541742 | 2.815044362 | -8.17454105  | 2.49E-15 | 23.64368955 |
| GNA13      | -0.371193148 | 4.007687789 | -8.170404646 | 2.57E-15 | 23.61389985 |
| MOB3C      | -0.307867889 | 2.334232517 | -8.164346071 | 2.68E-15 | 23.57028773 |
| NIPSNAP1   | 0.429159732  | 4.742040239 | 8.158264     | 2.81E-15 | 23.52653132 |
| IGKV2-28   | -0.912543251 | 1.450863733 | -8.156954677 | 2.83E-15 | 23.51711487 |
| COL5A1     | -0.860430815 | 4.519873493 | -8.155789459 | 2.86E-15 | 23.50873577 |
| IL33       | -0.800501527 | 2.694142473 | -8.153217837 | 2.91E-15 | 23.49024644 |
| GUCY1A3    | -0.540509725 | 2.426389121 | -8.152740519 | 2.92E-15 | 23.48681514 |
| MAN1C1     | -0.411444915 | 1.366922895 | -8.150266154 | 2.97E-15 | 23.46903006 |
| SSC5D      | -0.563448351 | 1.952513399 | -8.149048154 | 3.00E-15 | 23.46027692 |
| FUOM       | -0.599146062 | 2.693214638 | -8.148862404 | 3.01E-15 | 23.45894211 |
| CASP10     | -0.411277226 | 2.53639909  | -8.148844946 | 3.01E-15 | 23.45881666 |
| RANBP3L    | -0.212771918 | 0.328856201 | -8.146860632 | 3.05E-15 | 23.44455882 |
| TRBJ2-4    | -0.363911448 | 0.386474991 | -8.145353886 | 3.08E-15 | 23.4337342  |
| TCF7       | -0.387023869 | 1.323904071 | -8.145119455 | 3.09E-15 | 23.43205016 |
| PELP1      | 0.360751478  | 3.510591526 | 8.14444162   | 3.10E-15 | 23.42718114 |
| IGLV3-27   | -1.433450898 | 3.688276424 | -8.143146304 | 3.13E-15 | 23.41787748 |
| OTUD1      | -0.354435522 | 2.77847665  | -8.141613365 | 3.17E-15 | 23.40686854 |
| TNFAIP2    | -0.812930455 | 4.475802347 | -8.132203575 | 3.39E-15 | 23.33932599 |
| IQSEC1     | -0.382867916 | 3.201094117 | -8.131988593 | 3.40E-15 | 23.33778358 |
| FXVD6      | -0.469448758 | 1.955537095 | -8.128538816 | 3.48E-15 | 23.31303687 |
| IGHV2-70   | -1.3784528   | 3.939345455 | -8.126045376 | 3.55E-15 | 23.29515538 |
| TAOK3      | -0.32179955  | 2.467825307 | -8.11953876  | 3.72E-15 | 23.2485135  |

|            |              |             |              |          |             |
|------------|--------------|-------------|--------------|----------|-------------|
| NECAB3     | 0.551714396  | 3.458749892 | 8.116491575  | 3.80E-15 | 23.22667995 |
| IGKV2-30   | -1.13427125  | 2.734931486 | -8.114476801 | 3.86E-15 | 23.21224723 |
| IGLV2-11   | -1.396523458 | 6.290399077 | -8.11103883  | 3.96E-15 | 23.18762585 |
| IGHV3-72   | -1.185716748 | 3.400123075 | -8.105424735 | 4.12E-15 | 23.14743711 |
| CCDC170    | -0.564105011 | 1.047212854 | -8.101470921 | 4.24E-15 | 23.11914636 |
| IGLV1-51   | -1.40049356  | 6.869324176 | -8.095574552 | 4.43E-15 | 23.07697568 |
| RIC1       | -0.314879149 | 1.989953732 | -8.088416763 | 4.66E-15 | 23.02581496 |
| AMPD1      | -0.333671021 | 0.476206626 | -8.088351441 | 4.67E-15 | 23.02534823 |
| IGHV3-63   | -0.692383698 | 1.388162771 | -8.087833237 | 4.68E-15 | 23.02164571 |
| GNL3       | 0.354580948  | 4.714126827 | 8.084184059  | 4.81E-15 | 22.99557779 |
| AHNAK      | -0.76023071  | 4.749232712 | -8.080699127 | 4.93E-15 | 22.97069159 |
| IL1R1      | -0.581704477 | 4.286011436 | -8.077292179 | 5.06E-15 | 22.94637024 |
| SPATA20P1  | -0.424540027 | 1.027509416 | -8.077141553 | 5.06E-15 | 22.94529514 |
| EPB41L3    | -0.512528636 | 1.668363617 | -8.07695731  | 5.07E-15 | 22.94398012 |
| KCNJ5      | -0.515484468 | 1.019709827 | -8.075227413 | 5.13E-15 | 22.93163422 |
| TRAJ5      | -0.294701399 | 0.296116132 | -8.07445585  | 5.16E-15 | 22.92612839 |
| IGLV3-1    | -1.388097222 | 6.104717514 | -8.074167454 | 5.17E-15 | 22.92407053 |
| F2R        | -0.551115987 | 3.515994661 | -8.060056485 | 5.73E-15 | 22.82344958 |
| SULF1      | -0.926380129 | 3.7754056   | -8.055410619 | 5.92E-15 | 22.79035093 |
| AC104699.1 | -0.535831157 | 0.976841924 | -8.053581123 | 6.00E-15 | 22.77732104 |
| CD300E     | -0.429642307 | 0.935702912 | -8.053142815 | 6.02E-15 | 22.77419969 |
| PARVB      | -0.386439861 | 2.066116734 | -8.046361168 | 6.32E-15 | 22.72592183 |
| IGSF21     | -0.341480606 | 0.634241356 | -8.043181579 | 6.47E-15 | 22.70329743 |
| LYST       | -0.334186022 | 1.46781037  | -8.042767906 | 6.49E-15 | 22.70035444 |
| MOB3B      | -0.423963283 | 1.587838807 | -8.04275677  | 6.49E-15 | 22.70027521 |
| IL18       | -0.63387365  | 3.048089695 | -8.04274225  | 6.49E-15 | 22.70017192 |
| CREBRF     | -0.297730808 | 1.686919114 | -8.03543561  | 6.84E-15 | 22.64820967 |
| CTB-41I6.2 | -0.328315221 | 0.751386141 | -8.033953244 | 6.92E-15 | 22.63767204 |
| STX12      | -0.26032406  | 4.138678369 | -8.032210213 | 7.00E-15 | 22.62528335 |
| RSAD2      | -0.637464385 | 2.22526839  | -8.031173587 | 7.06E-15 | 22.61791645 |
| EFEMP2     | -0.517382878 | 3.041715567 | -8.01502111  | 7.93E-15 | 22.50322165 |
| EBF1       | -0.274142303 | 0.801177735 | -8.013951896 | 7.99E-15 | 22.4956357  |
| FGF2       | -0.318767936 | 0.619036993 | -8.013233856 | 8.03E-15 | 22.49054173 |

|              |              |             |              |          |             |
|--------------|--------------|-------------|--------------|----------|-------------|
| RP11-455F5.5 | -0.30397368  | 0.647905577 | -8.010004228 | 8.22E-15 | 22.4676342  |
| IGHV4-31     | -1.380510223 | 4.502429463 | -8.008608389 | 8.30E-15 | 22.45773581 |
| TRBV23-1     | -0.248417332 | 0.315929569 | -8.003991029 | 8.58E-15 | 22.42500197 |
| IGKV3D-15    | -1.128697305 | 2.643628584 | -8.003853446 | 8.59E-15 | 22.42402682 |
| C1orf56      | 0.443923833  | 2.462260925 | 8.002660095  | 8.67E-15 | 22.41556927 |
| CRTAP        | -0.340326959 | 4.490812922 | -7.998064272 | 8.96E-15 | 22.38300674 |
| SLC11A1      | -0.568670755 | 2.061046224 | -7.993024688 | 9.29E-15 | 22.34731664 |
| ICA1         | 0.465609954  | 3.399141346 | 7.992438265  | 9.33E-15 | 22.34316474 |
| NR2F6        | 0.44427181   | 4.509760898 | 7.991491797  | 9.39E-15 | 22.33646421 |
| GRHL2        | 0.434987353  | 3.329382382 | 7.986090006  | 9.76E-15 | 22.29823391 |
| TNIP1        | -0.327951366 | 4.866018199 | -7.985196947 | 9.83E-15 | 22.29191535 |
| MR1          | -0.418825106 | 2.842700076 | -7.984590193 | 9.87E-15 | 22.28762276 |
| CCL3L3       | -0.489845027 | 1.184961467 | -7.982280118 | 1.00E-14 | 22.27128204 |
| CEACAM4      | -0.485952401 | 0.956090912 | -7.98160352  | 1.01E-14 | 22.26649669 |
| APLNR        | -0.558827598 | 2.037265003 | -7.977659028 | 1.04E-14 | 22.2386049  |
| TLR6         | -0.340345666 | 1.061327441 | -7.977244732 | 1.04E-14 | 22.235676   |
| IGHV3-66     | -1.136752158 | 3.174875698 | -7.976617735 | 1.05E-14 | 22.23124362 |
| MCTP1        | -0.3465538   | 1.085502288 | -7.9739838   | 1.07E-14 | 22.21262667 |
| IGLV1-50     | -0.764646184 | 1.444494413 | -7.973852223 | 1.07E-14 | 22.2116968  |
| IGKV1-12     | -1.033827759 | 2.524669461 | -7.972181684 | 1.08E-14 | 22.19989186 |
| VDR          | -0.567230199 | 3.31451585  | -7.965426426 | 1.13E-14 | 22.15217501 |
| BLOC1S4      | 0.33414388   | 3.58874651  | 7.960391922  | 1.17E-14 | 22.11663332 |
| SLFN12       | -0.376970247 | 1.565077131 | -7.955255963 | 1.22E-14 | 22.08039329 |
| IGLV8-61     | -1.472243991 | 4.680302606 | -7.949477867 | 1.27E-14 | 22.03964389 |
| AL359753.1   | -0.467071566 | 0.561670842 | -7.944129418 | 1.32E-14 | 22.00194495 |
| HMHA1        | -0.49777446  | 3.519660548 | -7.942868104 | 1.33E-14 | 21.99305735 |
| GBGT1        | -0.394373859 | 1.951603995 | -7.940858486 | 1.35E-14 | 21.97889921 |
| AC027319.1   | -0.284498412 | 0.395056589 | -7.940562606 | 1.35E-14 | 21.97681492 |
| ACKR1        | -0.850747375 | 2.339769333 | -7.939764164 | 1.36E-14 | 21.97119068 |
| IGLV1-47     | -1.336299727 | 6.286524819 | -7.938147253 | 1.38E-14 | 21.95980248 |
| U62631.5     | -0.261504716 | 0.325710052 | -7.937395121 | 1.38E-14 | 21.95450569 |
| LPCAT2       | -0.435393784 | 2.145992902 | -7.934799449 | 1.41E-14 | 21.93622898 |
| SCARF1       | -0.515251697 | 2.135993758 | -7.92862421  | 1.47E-14 | 21.89276636 |

|                    |              |             |              |          |             |
|--------------------|--------------|-------------|--------------|----------|-------------|
| ANO6               | -0.384712726 | 3.423577196 | -7.928312224 | 1.48E-14 | 21.89057124 |
| CNN1               | -0.63121618  | 2.230707894 | -7.9266229   | 1.50E-14 | 21.87868635 |
| GATA3              | -0.490992178 | 1.255220876 | -7.925512627 | 1.51E-14 | 21.87087633 |
| TPP1               | -0.365523132 | 5.621189734 | -7.925232472 | 1.51E-14 | 21.86890576 |
| HLA-H              | -0.703043411 | 5.173463758 | -7.921041893 | 1.56E-14 | 21.8394363  |
| PET117             | 0.316927313  | 2.38928623  | 7.919067219  | 1.58E-14 | 21.82555397 |
| MAP1LC3C           | -0.627063903 | 1.228420706 | -7.918097563 | 1.59E-14 | 21.81873808 |
| FAM86JP            | 0.298842397  | 1.249127591 | 7.912548476  | 1.65E-14 | 21.77974501 |
| LYSMD2             | -0.366855777 | 2.700373478 | -7.912396819 | 1.65E-14 | 21.77867963 |
| IDS                | -0.538744199 | 4.107690466 | -7.911025502 | 1.67E-14 | 21.76904688 |
| HCG4P7             | -0.556140025 | 1.960804377 | -7.909370867 | 1.69E-14 | 21.75742571 |
| PRR16              | -0.324801461 | 0.945896941 | -7.908087059 | 1.71E-14 | 21.7484103  |
| SYNDIG1            | -0.479014544 | 0.938454185 | -7.905579468 | 1.74E-14 | 21.73080429 |
| FOXF1              | -0.446813135 | 1.6177577   | -7.901303562 | 1.79E-14 | 21.70079277 |
| NELFCD             | 0.351549304  | 3.909058052 | 7.897684337  | 1.84E-14 | 21.67540019 |
| IGHV3-13           | -1.291877127 | 3.323153136 | -7.893152906 | 1.90E-14 | 21.64362027 |
| CCDC88A            | -0.387588185 | 1.744571964 | -7.891622511 | 1.92E-14 | 21.63289047 |
| RP4-575N6.4        | -0.228739389 | 0.526247243 | -7.891225085 | 1.92E-14 | 21.63010434 |
| DDX60              | -0.603285955 | 2.710334131 | -7.887717368 | 1.97E-14 | 21.60551834 |
| XXbac-BPG170G13.31 | -0.361077067 | 0.536045636 | -7.886636278 | 1.99E-14 | 21.59794257 |
| RCCD1              | 0.329394934  | 1.859633693 | 7.886299969  | 1.99E-14 | 21.59558603 |
| GPR176             | -0.514497431 | 1.578645806 | -7.878978002 | 2.10E-14 | 21.54430005 |
| TRGC2              | -0.442470897 | 0.899854865 | -7.87860781  | 2.11E-14 | 21.54170807 |
| CREBL2             | -0.341763882 | 4.196593339 | -7.878479622 | 2.11E-14 | 21.54081055 |
| ASPN               | -0.850875607 | 3.321437021 | -7.878167757 | 2.11E-14 | 21.53862705 |
| PLAC9              | -0.496087041 | 1.920139053 | -7.872894917 | 2.19E-14 | 21.50171987 |
| NIN                | -0.328162343 | 2.051387141 | -7.872187162 | 2.20E-14 | 21.4967674  |
| CPPED1             | -0.412446236 | 2.184640818 | -7.871884653 | 2.21E-14 | 21.49465073 |
| RP11-672A2.4       | -0.284226531 | 0.694079283 | -7.868657337 | 2.26E-14 | 21.4720729  |
| RP6-159A1.4        | -0.39963786  | 0.818708479 | -7.868045638 | 2.27E-14 | 21.46779435 |
| SHMT1              | 0.425148217  | 2.579675228 | 7.867738588  | 2.27E-14 | 21.46564678 |
| ARHGAP6            | -0.236779603 | 0.590655481 | -7.866694097 | 2.29E-14 | 21.45834188 |
| TBXAS1             | -0.476857807 | 2.406370313 | -7.861596502 | 2.38E-14 | 21.42270145 |



|              |              |             |              |          |             |
|--------------|--------------|-------------|--------------|----------|-------------|
| RTP4         | -0.62013195  | 2.332194852 | -7.861586537 | 2.38E-14 | 21.42263179 |
| IGKV6D-21    | -1.047634665 | 1.711752328 | -7.86131897  | 2.38E-14 | 21.42076157 |
| LIMS2        | -0.409521347 | 1.4767578   | -7.859171636 | 2.42E-14 | 21.40575402 |
| TMEM156      | -0.649317083 | 1.535652587 | -7.8509925   | 2.56E-14 | 21.34861993 |
| IGHV3-76     | -0.573764326 | 0.863099152 | -7.850079366 | 2.58E-14 | 21.34224425 |
| POLR2H       | 0.359064011  | 4.135644403 | 7.849560984  | 2.59E-14 | 21.33862506 |
| RNF130       | -0.314339254 | 2.991706404 | -7.84951     | 2.59E-14 | 21.33826912 |
| EMP1         | -0.629460449 | 3.971701714 | -7.849409501 | 2.59E-14 | 21.33756749 |
| IGKV1OR2-108 | -1.137422512 | 2.955180111 | -7.842947199 | 2.71E-14 | 21.29246592 |
| IGKV3D-11    | -0.975917894 | 2.480684828 | -7.838691288 | 2.79E-14 | 21.26277897 |
| ZNF25        | -0.266996578 | 1.829493792 | -7.835717692 | 2.85E-14 | 21.24204421 |
| IGLL5        | -1.185543903 | 4.955561664 | -7.835327548 | 2.86E-14 | 21.2393242  |
| IGHV3OR16-10 | -0.527653324 | 0.780832525 | -7.832847144 | 2.91E-14 | 21.22203381 |
| CARD17       | -0.301083774 | 0.450677579 | -7.827979667 | 3.02E-14 | 21.18811602 |
| ALDH1A3      | -0.634398289 | 1.906411586 | -7.825815869 | 3.06E-14 | 21.17304342 |
| TXLNB        | -0.245709414 | 0.459263016 | -7.824971241 | 3.08E-14 | 21.16716079 |
| ARHGAP17     | -0.259544953 | 2.538141722 | -7.822427293 | 3.14E-14 | 21.14944578 |
| TIMP1        | -0.59611403  | 8.149015717 | -7.81975671  | 3.20E-14 | 21.13085378 |
| FRMD6        | -0.549463097 | 1.770623807 | -7.819443668 | 3.20E-14 | 21.12867478 |
| LIX1L        | -0.469238519 | 3.104227482 | -7.814545739 | 3.32E-14 | 21.09459043 |
| CTB-41I6.1   | -0.305610272 | 0.648074275 | -7.811840398 | 3.38E-14 | 21.0757713  |
| CPXM1        | -0.707998242 | 2.522449324 | -7.808294268 | 3.47E-14 | 21.05111109 |
| CTSG         | -0.497229889 | 0.802820448 | -7.805499166 | 3.53E-14 | 21.03167979 |
| PACSIN3      | 0.534110487  | 3.692956634 | 7.805269406  | 3.54E-14 | 21.03008276 |
| IGHV3-7      | -1.024699442 | 2.633123373 | -7.804946933 | 3.55E-14 | 21.02784136 |
| PATL2        | -0.276583336 | 0.599487897 | -7.80490717  | 3.55E-14 | 21.02756498 |
| FOXP4-AS1    | 0.361044626  | 0.723826747 | 7.804091236  | 3.57E-14 | 21.02189404 |
| HERC5        | -0.479594093 | 1.753825875 | -7.802724307 | 3.60E-14 | 21.01239459 |
| IGHV6-1      | -1.036460283 | 2.234489475 | -7.801026784 | 3.65E-14 | 21.00059948 |
| RP11-81H14.2 | -0.255822115 | 0.4052953   | -7.797476197 | 3.74E-14 | 20.975935   |
| RGS16        | -0.673570685 | 3.607519848 | -7.790227785 | 3.94E-14 | 20.92561047 |
| SAMD4A       | -0.45558825  | 1.621179163 | -7.786984537 | 4.03E-14 | 20.90310498 |
| IGHV3-60     | -0.628071994 | 1.144276962 | -7.786367153 | 4.05E-14 | 20.89882167 |

|               |              |             |              |          |             |
|---------------|--------------|-------------|--------------|----------|-------------|
| PPME1         | 0.301038672  | 3.236911903 | 7.786171642  | 4.05E-14 | 20.8974653  |
| PRR36         | 0.664010992  | 2.408827372 | 7.785222909  | 4.08E-14 | 20.89088379 |
| COL5A2        | -0.823679444 | 4.468301001 | -7.783914711 | 4.12E-14 | 20.88180964 |
| IGLC3         | -1.302600987 | 8.147919868 | -7.778964182 | 4.26E-14 | 20.84748175 |
| IRAK3         | -0.56699864  | 1.782613824 | -7.778867267 | 4.27E-14 | 20.84680989 |
| C8orf82       | 0.424950795  | 3.089844945 | 7.778156805  | 4.29E-14 | 20.84188486 |
| FAM83H        | 0.524903651  | 4.529521739 | 7.775148495  | 4.38E-14 | 20.82103471 |
| GNLY          | -0.818256397 | 2.077198126 | -7.772857933 | 4.45E-14 | 20.8051634  |
| PFDN6         | 0.362807807  | 3.776352151 | 7.772289595  | 4.47E-14 | 20.80122595 |
| NALCN         | -0.217615716 | 0.454276144 | -7.769954532 | 4.54E-14 | 20.78505099 |
| MCOLN1        | -0.309714503 | 2.901718274 | -7.769868045 | 4.54E-14 | 20.78445197 |
| ANXA5         | -0.352340011 | 6.849056826 | -7.769452231 | 4.56E-14 | 20.78157205 |
| EXOC3L4       | -0.296378042 | 0.480488031 | -7.769372435 | 4.56E-14 | 20.7810194  |
| SMOC2         | -0.733382491 | 2.563337974 | -7.761823866 | 4.81E-14 | 20.72875961 |
| HAMP          | -0.355734842 | 0.604658912 | -7.761799698 | 4.81E-14 | 20.72859235 |
| RP11-876N24.3 | -0.581113435 | 1.739577158 | -7.760949598 | 4.84E-14 | 20.7227095  |
| ETV7          | -0.561680486 | 2.462385349 | -7.760708179 | 4.85E-14 | 20.72103892 |
| WARS          | -0.665801627 | 5.347515951 | -7.758813611 | 4.91E-14 | 20.70793029 |
| IGKV3-7       | -0.997636036 | 2.537371793 | -7.756754084 | 4.98E-14 | 20.69368313 |
| CDC42SE2      | -0.335376346 | 4.07142576  | -7.755459705 | 5.03E-14 | 20.68473055 |
| EPCAM         | 0.513936347  | 7.474375776 | 7.75477447   | 5.05E-14 | 20.67999159 |
| RP11-731F5.2  | -0.360489839 | 0.56926547  | -7.750745267 | 5.20E-14 | 20.65213299 |
| NXPE3         | -0.360380263 | 1.541184641 | -7.750343564 | 5.21E-14 | 20.64935616 |
| HERC3         | -0.324714183 | 1.937077734 | -7.749004322 | 5.26E-14 | 20.64009931 |
| KLRC1         | -0.240256873 | 0.353738721 | -7.748249427 | 5.29E-14 | 20.63488201 |
| IGHV1-2       | -1.428782294 | 5.501475189 | -7.74663353  | 5.35E-14 | 20.62371543 |
| NDN           | -0.603663435 | 3.083997359 | -7.746578703 | 5.35E-14 | 20.62333658 |
| HSPA12B       | -0.378998297 | 1.445757488 | -7.740380213 | 5.59E-14 | 20.58051938 |
| CARD9         | -0.323820134 | 0.906922925 | -7.738201071 | 5.68E-14 | 20.56547294 |
| IGHV1OR15-2   | -0.995875223 | 2.068588134 | -7.737486553 | 5.71E-14 | 20.56054009 |
| CTGF          | -0.765903155 | 5.978259232 | -7.736905731 | 5.73E-14 | 20.55653051 |
| KIAA1549      | 0.429497364  | 1.366539593 | 7.735803327  | 5.77E-14 | 20.54892095 |
| HMCN1         | -0.498810476 | 1.384531265 | -7.734212443 | 5.84E-14 | 20.53794106 |

|               |              |             |              |          |             |
|---------------|--------------|-------------|--------------|----------|-------------|
| IGHV2-26      | -1.343645183 | 3.944115228 | -7.729850789 | 6.02E-14 | 20.50784708 |
| IGLC2         | -1.233842727 | 8.878279629 | -7.727155179 | 6.13E-14 | 20.48925491 |
| CCDC58        | 0.38865046   | 3.091445414 | 7.725205953  | 6.22E-14 | 20.47581388 |
| SGK1          | -0.575250139 | 3.351611877 | -7.723732567 | 6.28E-14 | 20.4656558  |
| IGKV1OR22-5   | -0.591315409 | 0.896715882 | -7.722308501 | 6.35E-14 | 20.4558392  |
| IGKV1-9       | -1.34182777  | 5.597203232 | -7.71965237  | 6.47E-14 | 20.43753334 |
| TBC1D30       | 0.40472138   | 1.751956931 | 7.717665508  | 6.56E-14 | 20.42384325 |
| SRPX          | -0.619228789 | 2.090651983 | -7.717593774 | 6.56E-14 | 20.42334903 |
| AC103563.5    | -0.897228723 | 1.545412412 | -7.717323515 | 6.57E-14 | 20.42148709 |
| SETDB2        | -0.252694106 | 1.687340972 | -7.715633437 | 6.65E-14 | 20.40984453 |
| AAED1         | -0.307924366 | 2.604763145 | -7.71387833  | 6.73E-14 | 20.39775612 |
| CEP120        | -0.281667341 | 2.167795237 | -7.712277495 | 6.81E-14 | 20.38673214 |
| RP11-686D22.7 | -0.384144872 | 1.646802602 | -7.711074361 | 6.87E-14 | 20.37844808 |
| GYLTL1B       | 0.776538609  | 3.339040331 | 7.711062073  | 6.87E-14 | 20.37836347 |
| IGKV2D-29     | -1.32513414  | 3.594413077 | -7.707714464 | 7.03E-14 | 20.3553192  |
| EEF1E1        | 0.352626854  | 2.60692603  | 7.707029335  | 7.06E-14 | 20.35060388 |
| IGHJ1         | -1.086229564 | 2.284912793 | -7.706095424 | 7.11E-14 | 20.34417687 |
| IGLV3-16      | -0.908825497 | 1.661395082 | -7.701081665 | 7.36E-14 | 20.30968356 |
| ENOX1         | -0.242284647 | 0.647606976 | -7.698305968 | 7.51E-14 | 20.2905951  |
| IGKV2OR22-4   | -0.754781    | 1.369212254 | -7.697772197 | 7.53E-14 | 20.28692498 |
| APOA1BP       | 0.447594123  | 5.967346612 | 7.695608786  | 7.65E-14 | 20.27205177 |
| HS3ST2        | -0.688159496 | 1.660598693 | -7.6943042   | 7.72E-14 | 20.26308448 |
| ROR1          | -0.405388263 | 1.141841167 | -7.69355764  | 7.76E-14 | 20.25795342 |
| MTMR6         | -0.326357914 | 2.914260647 | -7.693504606 | 7.76E-14 | 20.25758893 |
| SH3KBP1       | -0.394936779 | 3.601661012 | -7.692546238 | 7.81E-14 | 20.25100272 |
| PITPNA-AS1    | 0.432757705  | 2.50283943  | 7.686711068  | 8.14E-14 | 20.21091554 |
| ATXN1         | -0.290319469 | 2.001144238 | -7.686578321 | 8.15E-14 | 20.21000387 |
| PPAP2B        | -0.405765664 | 3.664094795 | -7.686485377 | 8.15E-14 | 20.20936555 |
| ZBTB42        | 0.399009944  | 2.828784703 | 7.685829588  | 8.19E-14 | 20.20486193 |
| NOP58         | 0.298364141  | 4.540349317 | 7.684161469  | 8.29E-14 | 20.19340751 |
| CLIP3         | -0.494476442 | 2.257094676 | -7.680875241 | 8.48E-14 | 20.1708478  |
| AC007386.4    | -0.296146235 | 0.514801048 | -7.679950477 | 8.53E-14 | 20.16450073 |
| IGKV1-39      | -1.077890491 | 2.156685734 | -7.678730835 | 8.61E-14 | 20.15613071 |

|                  |              |             |              |          |             |
|------------------|--------------|-------------|--------------|----------|-------------|
| ADH1B            | -1.017200292 | 2.176568103 | -7.677868175 | 8.66E-14 | 20.15021117 |
| IL4R             | -0.391206098 | 4.088521942 | -7.67775616  | 8.66E-14 | 20.14944257 |
| ANKRD39          | 0.240399889  | 1.721515334 | 7.677361916  | 8.69E-14 | 20.14673749 |
| TSPAN33          | -0.537089024 | 2.598587594 | -7.675868679 | 8.78E-14 | 20.13649273 |
| FAM124B          | -0.203301954 | 0.521168844 | -7.671880799 | 9.03E-14 | 20.10914049 |
| PIK3R1           | -0.382330702 | 2.383593139 | -7.666063353 | 9.40E-14 | 20.06925961 |
| BDH1             | 0.400280025  | 1.772398534 | 7.665785352  | 9.42E-14 | 20.0673544  |
| CLIC2            | -0.662013946 | 3.526491113 | -7.665056467 | 9.47E-14 | 20.06235943 |
| RBBP8NL          | 0.401555677  | 1.481715058 | 7.65962783   | 9.83E-14 | 20.02516936 |
| IGLC6            | -0.694235739 | 1.543987966 | -7.658039861 | 9.94E-14 | 20.01429455 |
| RNF125           | -0.307627592 | 1.206298517 | -7.655066514 | 1.01E-13 | 19.99393711 |
| LYVE1            | -0.508828599 | 1.381359567 | -7.654234336 | 1.02E-13 | 19.9882406  |
| IGHV4-34         | -1.31759031  | 5.865910377 | -7.652588293 | 1.03E-13 | 19.97697437 |
| TRAJ4            | -0.283583507 | 0.311270522 | -7.651496236 | 1.04E-13 | 19.96950093 |
| PSTPIP2          | -0.426862079 | 2.068662584 | -7.649966313 | 1.05E-13 | 19.95903237 |
| C1orf186         | -0.427570028 | 0.87750773  | -7.648267434 | 1.06E-13 | 19.94740967 |
| TNFRSF14         | -0.515791695 | 3.409452585 | -7.647041096 | 1.07E-13 | 19.93902107 |
| LL22NC03-88E1.18 | -0.426580688 | 0.571358603 | -7.643140054 | 1.10E-13 | 19.91234358 |
| MYBPC2           | -0.312163363 | 0.484288978 | -7.64288963  | 1.10E-13 | 19.9106314  |
| HLA-DRB6         | -1.051368249 | 4.853580029 | -7.642647688 | 1.11E-13 | 19.90897727 |
| IGHJ3P           | -1.163237604 | 3.056678734 | -7.642600947 | 1.11E-13 | 19.9086577  |
| EIF4E3           | -0.329469585 | 1.805881887 | -7.641115599 | 1.12E-13 | 19.89850346 |
| IPO4             | 0.266228595  | 1.21414427  | 7.637357733  | 1.15E-13 | 19.87282061 |
| ADAMTS8          | -0.507982465 | 0.863161099 | -7.627343895 | 1.23E-13 | 19.80443051 |
| TNFSF13          | -0.454914281 | 3.280939884 | -7.623309266 | 1.27E-13 | 19.7768958  |
| IMP4             | 0.258376226  | 3.965229209 | 7.620538064  | 1.29E-13 | 19.75799013 |
| LINC00926        | -0.427043772 | 0.861950049 | -7.618388423 | 1.31E-13 | 19.74332861 |
| VSTM4            | -0.437631405 | 1.53257957  | -7.616042238 | 1.33E-13 | 19.7273303  |
| CAP1             | -0.275259876 | 6.679441283 | -7.613931049 | 1.35E-13 | 19.71293774 |
| KCNMA1           | -0.329467005 | 0.739596536 | -7.609204354 | 1.40E-13 | 19.68072596 |
| TNFRSF13C        | -0.518180993 | 1.10497771  | -7.608176014 | 1.41E-13 | 19.67372006 |
| DNASE2           | -0.274913785 | 5.082187642 | -7.607356841 | 1.41E-13 | 19.66813971 |
| SPIRE2           | 0.474388524  | 1.816800678 | 7.606425484  | 1.42E-13 | 19.66179573 |

|               |              |             |              |          |             |
|---------------|--------------|-------------|--------------|----------|-------------|
| MCC           | -0.337137785 | 1.094417935 | -7.600866277 | 1.48E-13 | 19.62394168 |
| ITGA5         | -0.612427733 | 3.634919969 | -7.598580676 | 1.50E-13 | 19.6083848  |
| NR1H3         | -0.400975006 | 2.911003464 | -7.597287232 | 1.52E-13 | 19.59958264 |
| TM7SF2        | 0.554323103  | 3.413559498 | 7.591552294  | 1.58E-13 | 19.5605695  |
| CD163L1       | -0.399762338 | 1.032664452 | -7.590048745 | 1.59E-13 | 19.55034514 |
| IGHV3-33      | -1.337578912 | 5.228329803 | -7.589748198 | 1.60E-13 | 19.54830157 |
| NAV3          | -0.252282251 | 0.423626699 | -7.589444385 | 1.60E-13 | 19.54623586 |
| IGHV3OR16-8   | -0.69768906  | 1.290887309 | -7.589338599 | 1.60E-13 | 19.5455166  |
| MYH11         | -0.767716546 | 2.42178609  | -7.589185806 | 1.60E-13 | 19.54447776 |
| PAMR1         | -0.413820627 | 1.172327354 | -7.581763538 | 1.69E-13 | 19.49403327 |
| RP11-148O21.2 | -0.389698345 | 0.533466401 | -7.581638185 | 1.69E-13 | 19.49318166 |
| ATP10A        | -0.55141362  | 1.785180905 | -7.577547549 | 1.74E-13 | 19.46539726 |
| IGKV1-33      | -0.841033017 | 1.365866729 | -7.57704223  | 1.74E-13 | 19.46196586 |
| COL15A1       | -0.730550406 | 3.027562149 | -7.567515413 | 1.86E-13 | 19.39730733 |
| RTKN          | 0.346112321  | 3.17641646  | 7.565923327  | 1.88E-13 | 19.38650813 |
| CCT3          | 0.383734024  | 6.350890171 | 7.562967687  | 1.92E-13 | 19.36646465 |
| LNPEP         | -0.294995053 | 2.231080223 | -7.56294247  | 1.92E-13 | 19.36629367 |
| IGHV3OR16-6   | -0.595047802 | 0.928583424 | -7.561027154 | 1.95E-13 | 19.35330843 |
| IGKV1OR9-2    | -0.381569153 | 0.463415537 | -7.560008218 | 1.96E-13 | 19.34640142 |
| PLB1          | -0.230841604 | 0.694159079 | -7.558221079 | 1.98E-13 | 19.33428883 |
| PLCL1         | -0.202901344 | 0.598104162 | -7.55482787  | 2.03E-13 | 19.31129711 |
| IGHV4-39      | -1.362779076 | 6.603866731 | -7.55305606  | 2.06E-13 | 19.29929493 |
| MRPS18A       | 0.328922787  | 4.113655372 | 7.546647979  | 2.15E-13 | 19.25590547 |
| PYCARD        | -0.572013878 | 3.619660603 | -7.54074265  | 2.24E-13 | 19.21594605 |
| EIF2B4        | 0.214567078  | 3.097428476 | 7.540667882  | 2.24E-13 | 19.21544027 |
| WNT10A        | -0.615379442 | 1.17208193  | -7.537156879 | 2.29E-13 | 19.19169443 |
| AL122127.2    | -0.790814457 | 1.93914198  | -7.535695954 | 2.32E-13 | 19.1818164  |
| TNC           | -1.096069224 | 4.296516838 | -7.532168945 | 2.37E-13 | 19.15797482 |
| IGKV1D-16     | -1.104288526 | 2.563999966 | -7.531386889 | 2.39E-13 | 19.15268954 |
| RP11-212I21.5 | -0.2018995   | 0.265749983 | -7.528377898 | 2.44E-13 | 19.13235831 |
| HTRA3         | -0.805184047 | 4.031220963 | -7.525742058 | 2.48E-13 | 19.11455369 |
| TRAJ1         | -0.329238318 | 0.399728176 | -7.518096871 | 2.62E-13 | 19.0629399  |
| AP000892.6    | -0.278235882 | 0.733241066 | -7.517547423 | 2.63E-13 | 19.0592321  |

|              |              |             |              |          |             |
|--------------|--------------|-------------|--------------|----------|-------------|
| LINC00582    | -0.332434376 | 0.568714077 | -7.512942383 | 2.71E-13 | 19.02816473 |
| IGHV3-42     | -0.453158314 | 0.636989582 | -7.508865116 | 2.79E-13 | 19.00067056 |
| MAML2        | -0.486410239 | 2.211276206 | -7.508572755 | 2.79E-13 | 18.99869954 |
| RP1-266L20.2 | 0.414274149  | 1.996752152 | 7.508354915  | 2.80E-13 | 18.99723097 |
| TCAF2        | -0.254765945 | 0.732883759 | -7.507137684 | 2.82E-13 | 18.98902558 |
| C3           | -0.988679031 | 6.534657546 | -7.507012923 | 2.82E-13 | 18.98818462 |
| NCEH1        | -0.523099205 | 3.350905457 | -7.505213839 | 2.86E-13 | 18.97605904 |
| SFRP2        | -1.171771158 | 5.2218016   | -7.49801286  | 3.00E-13 | 18.9275486  |
| ZBTB12       | 0.435913554  | 2.138294327 | 7.497822897  | 3.01E-13 | 18.92626938 |
| SLC25A10     | 0.492705067  | 2.87649836  | 7.4958468    | 3.05E-13 | 18.91296387 |
| TNF          | -0.45214367  | 0.993313576 | -7.487296338 | 3.23E-13 | 18.85542384 |
| TBC1D27      | -0.232373584 | 0.268172873 | -7.486753465 | 3.24E-13 | 18.85177236 |
| LINC01270    | 0.374150576  | 1.007724071 | 7.485253728  | 3.28E-13 | 18.84168591 |
| AC246787.3   | -0.794588993 | 1.50295347  | -7.483628733 | 3.31E-13 | 18.83075886 |
| PSMB8        | -0.500495728 | 5.808777612 | -7.478077132 | 3.44E-13 | 18.79344215 |
| OSTN-AS1     | -0.211400032 | 0.259476783 | -7.476550644 | 3.48E-13 | 18.78318529 |
| KDF1         | 0.3446946    | 3.707122232 | 7.470774736  | 3.62E-13 | 18.74439059 |
| METTTL21A    | 0.241140957  | 1.799602247 | 7.46931506   | 3.65E-13 | 18.73459026 |
| TSPAN4       | -0.490214073 | 3.413144594 | -7.468601532 | 3.67E-13 | 18.72980015 |
| IGHV1-12     | -0.911230509 | 1.953876666 | -7.468486911 | 3.67E-13 | 18.7290307  |
| IGHV3-38     | -0.610855685 | 1.168385065 | -7.467169494 | 3.71E-13 | 18.72018759 |
| CDO1         | -0.370014537 | 0.770996783 | -7.465102916 | 3.76E-13 | 18.70631828 |
| MAP7D3       | -0.300313555 | 1.048203336 | -7.464683894 | 3.77E-13 | 18.70350649 |
| POLR1C       | 0.307722718  | 3.475524539 | 7.462949973  | 3.82E-13 | 18.69187261 |
| TPM4         | -0.423011641 | 5.880043561 | -7.462424996 | 3.83E-13 | 18.68835066 |
| EMR3         | -0.202480011 | 0.351175024 | -7.461094885 | 3.86E-13 | 18.67942813 |
| VENTX        | -0.259842238 | 0.605264111 | -7.460805697 | 3.87E-13 | 18.67748839 |
| SEMA3C       | -0.684745671 | 3.182238786 | -7.460580634 | 3.88E-13 | 18.67597882 |
| hsa-mir-4538 | -0.642918892 | 0.97742919  | -7.458500388 | 3.93E-13 | 18.66202762 |
| CH25H        | -0.834778527 | 2.457696203 | -7.456133984 | 4.00E-13 | 18.64616107 |
| IGHA1        | -1.250244471 | 10.61278728 | -7.455899159 | 4.00E-13 | 18.64458681 |
| HMOX1        | -0.569668963 | 4.590888101 | -7.444481823 | 4.33E-13 | 18.56809291 |
| SENCR        | -0.223119687 | 0.526638442 | -7.442265512 | 4.39E-13 | 18.55325492 |

|            |              |             |              |          |             |
|------------|--------------|-------------|--------------|----------|-------------|
| RENBP      | -0.588875534 | 3.067134198 | -7.441853937 | 4.41E-13 | 18.55049985 |
| ARFIP2     | 0.298977017  | 3.65510568  | 7.440490307  | 4.45E-13 | 18.54137263 |
| HCFC2      | -0.241430432 | 1.626977738 | -7.438797935 | 4.50E-13 | 18.53004689 |
| ARHGEF15   | -0.378727369 | 1.465056036 | -7.43710339  | 4.55E-13 | 18.51870868 |
| CFLAR      | -0.375233962 | 3.112622837 | -7.436460928 | 4.57E-13 | 18.51441049 |
| SLC29A2    | 0.509583659  | 3.355737468 | 7.430539369  | 4.76E-13 | 18.47480824 |
| MMP14      | -0.644779263 | 5.97839276  | -7.424656693 | 4.95E-13 | 18.435491   |
| IGHV3-41   | -0.661126533 | 1.310839044 | -7.422444743 | 5.03E-13 | 18.42071374 |
| ITPRIPL1   | -0.249205305 | 0.670917022 | -7.420905384 | 5.08E-13 | 18.41043189 |
| SERINC1    | -0.331239957 | 5.885110322 | -7.419344651 | 5.14E-13 | 18.40000903 |
| GREM1      | -0.799158622 | 1.859482881 | -7.418824222 | 5.15E-13 | 18.3965339  |
| IGHM       | -1.378238535 | 7.473838611 | -7.417150556 | 5.21E-13 | 18.38535943 |
| DHRS9      | -0.727999424 | 1.492021112 | -7.412599318 | 5.38E-13 | 18.35498263 |
| IGKV1OR2-3 | -0.541805993 | 0.797904696 | -7.411814903 | 5.40E-13 | 18.34974863 |
| AP001469.9 | 0.279228962  | 0.857382754 | 7.409870171  | 5.48E-13 | 18.33677435 |
| HYKK       | 0.245578248  | 0.779150353 | 7.40848787   | 5.53E-13 | 18.32755399 |
| NTM        | -0.508840174 | 1.489942405 | -7.407454645 | 5.57E-13 | 18.32066297 |
| IGHV3-47   | -0.6294387   | 1.2716445   | -7.405489382 | 5.64E-13 | 18.30755791 |
| RALB       | -0.350673396 | 4.729338607 | -7.403449427 | 5.72E-13 | 18.29395772 |
| AC103563.2 | -0.671606323 | 1.102930565 | -7.402238775 | 5.77E-13 | 18.28588784 |
| IGKV6-21   | -1.197511158 | 2.895110157 | -7.39901928  | 5.90E-13 | 18.26443269 |
| IGLV3-10   | -1.434468834 | 5.42635994  | -7.398635005 | 5.91E-13 | 18.26187233 |
| MRPS5      | 0.242638449  | 3.220627127 | 7.396731448  | 5.99E-13 | 18.24919081 |
| IL27RA     | -0.586546383 | 3.615585003 | -7.393999083 | 6.10E-13 | 18.23099233 |
| AF131215.2 | -0.325191473 | 0.755159448 | -7.393328892 | 6.13E-13 | 18.22652945 |
| MTX2       | 0.273970166  | 4.581796725 | 7.391746708  | 6.19E-13 | 18.2159948  |
| IGHD3-3    | -0.940362782 | 1.72199914  | -7.389310414 | 6.30E-13 | 18.19977676 |
| ZNF385A    | -0.475933638 | 3.711982146 | -7.38804173  | 6.35E-13 | 18.19133302 |
| LRRN3      | -0.293469014 | 0.509803621 | -7.386250337 | 6.43E-13 | 18.17941237 |
| MYADM      | -0.541019862 | 5.110675435 | -7.385965475 | 6.44E-13 | 18.17751699 |
| FXVD1      | -0.209800602 | 0.407177585 | -7.383506051 | 6.55E-13 | 18.16115527 |
| PI4K2A     | -0.277890687 | 3.250966402 | -7.382605394 | 6.59E-13 | 18.15516459 |
| IGHV5-78   | -0.684457889 | 1.656912682 | -7.381993764 | 6.62E-13 | 18.15109669 |

|               |              |             |              |          |             |
|---------------|--------------|-------------|--------------|----------|-------------|
| RHBDF2        | -0.42486737  | 2.999936482 | -7.3789721   | 6.75E-13 | 18.13100386 |
| CHSY3         | -0.353155964 | 0.995170014 | -7.377862681 | 6.80E-13 | 18.12362833 |
| BCL6B         | -0.382774081 | 1.910269517 | -7.376588311 | 6.86E-13 | 18.11515729 |
| ANP32A        | 0.257069183  | 4.077560136 | 7.373674507  | 7.00E-13 | 18.09579294 |
| PAICS         | 0.420217604  | 4.135953382 | 7.370346181  | 7.16E-13 | 18.07368131 |
| CLEC4G        | -0.20553414  | 0.296906654 | -7.369521192 | 7.20E-13 | 18.06820176 |
| IGHV3OR15-7   | -0.737116075 | 1.44122658  | -7.368739134 | 7.24E-13 | 18.06300781 |
| DBNDD1        | 0.485918071  | 2.884527865 | 7.368672382  | 7.24E-13 | 18.0625645  |
| RP11-166D19.1 | -0.470497672 | 1.250019995 | -7.365875807 | 7.38E-13 | 18.04399512 |
| CCDC71L       | -0.444116686 | 3.203789177 | -7.362345021 | 7.56E-13 | 18.02055863 |
| CORIN         | -0.217463527 | 0.406239396 | -7.348640313 | 8.29E-13 | 17.92967561 |
| ZNF101        | -0.268750251 | 1.537755662 | -7.345220935 | 8.48E-13 | 17.90702114 |
| CAV1          | -0.821105612 | 4.463198969 | -7.342452411 | 8.64E-13 | 17.888685   |
| IKBKE         | -0.348927106 | 2.651975076 | -7.34136524  | 8.71E-13 | 17.88148611 |
| LAMP5         | -0.577327148 | 1.741584376 | -7.340768657 | 8.74E-13 | 17.87753609 |
| FFAR4         | -0.337386031 | 0.658782381 | -7.339543805 | 8.81E-13 | 17.86942708 |
| PDHX          | 0.282908726  | 3.148203888 | 7.339503858  | 8.82E-13 | 17.86916263 |
| RRAS          | -0.466784318 | 5.285141214 | -7.338139401 | 8.90E-13 | 17.86013069 |
| HSPD1         | 0.40893053   | 6.253156016 | 7.337790838  | 8.92E-13 | 17.85782362 |
| SAMD1         | 0.336487714  | 4.128833536 | 7.336081061  | 9.02E-13 | 17.84650819 |
| RSPO1         | -0.229166616 | 0.262695414 | -7.334488261 | 9.12E-13 | 17.83596883 |
| IL1RN         | -0.647898326 | 2.505838313 | -7.333432175 | 9.18E-13 | 17.82898186 |
| IGHD3-9       | -0.780182192 | 1.330661942 | -7.332494438 | 9.24E-13 | 17.82277855 |
| TUBA1A        | -0.577022671 | 5.243154466 | -7.331770568 | 9.29E-13 | 17.81799045 |
| IGHV3-35      | -0.756611918 | 1.551128807 | -7.330819795 | 9.35E-13 | 17.81170206 |
| IGHV1-45      | -1.020741722 | 2.182751972 | -7.321351124 | 9.96E-13 | 17.74911226 |
| P2RY1         | -0.274915337 | 0.879618052 | -7.320249646 | 1.00E-12 | 17.7418355  |
| ZBTB47        | -0.328383188 | 2.185883503 | -7.316033315 | 1.03E-12 | 17.71398903 |
| AP001434.2    | -0.336441197 | 0.816060209 | -7.314242891 | 1.04E-12 | 17.70216821 |
| TWIST2        | -0.404554029 | 1.049117163 | -7.308631916 | 1.09E-12 | 17.66513825 |
| NOL10         | 0.255005424  | 3.340690649 | 7.306616262  | 1.10E-12 | 17.65184142 |
| FAM136A       | 0.303014473  | 4.061409061 | 7.304376296  | 1.12E-12 | 17.6370683  |
| RP11-294C11.2 | -0.647694962 | 1.192883671 | -7.303267092 | 1.12E-12 | 17.62975419 |



|              |              |             |              |          |             |
|--------------|--------------|-------------|--------------|----------|-------------|
| IGHV3-37     | -0.343138612 | 0.483781869 | -7.302681295 | 1.13E-12 | 17.62589179 |
| SMARCA2      | -0.431027911 | 3.440377535 | -7.302155916 | 1.13E-12 | 17.62242797 |
| CNOT6L       | -0.264171614 | 2.487489181 | -7.296748991 | 1.18E-12 | 17.58679177 |
| LYSMD1       | 0.3554703    | 2.535499098 | 7.296727034  | 1.18E-12 | 17.5866471  |
| GUCY1B3      | -0.427041497 | 2.469410445 | -7.296439663 | 1.18E-12 | 17.58475368 |
| VCAN         | -0.775865039 | 3.710311035 | -7.295652984 | 1.18E-12 | 17.57957075 |
| IGHV1OR16-1  | -0.442980371 | 0.601486584 | -7.293453139 | 1.20E-12 | 17.56507977 |
| TPSD1        | -0.613418335 | 1.042995394 | -7.292021769 | 1.21E-12 | 17.55565283 |
| FLVCR1       | 0.372839448  | 2.198723817 | 7.291968429  | 1.21E-12 | 17.55530156 |
| RAB42        | -0.494019096 | 2.039015039 | -7.285160255 | 1.27E-12 | 17.51048392 |
| MXRA8        | -0.681567993 | 4.543724636 | -7.283866741 | 1.28E-12 | 17.50197263 |
| DBH-AS1      | -0.376022366 | 0.825727779 | -7.282756428 | 1.29E-12 | 17.49466778 |
| HERPUD1      | -0.397233228 | 4.963669763 | -7.281778736 | 1.30E-12 | 17.4882362  |
| IGHG1        | -1.344388716 | 9.072148864 | -7.281201899 | 1.30E-12 | 17.4844419  |
| IGLC7        | -1.253619253 | 3.424107791 | -7.28090472  | 1.31E-12 | 17.48248722 |
| APOL1        | -0.702578227 | 5.384083286 | -7.280647549 | 1.31E-12 | 17.48079575 |
| CABYR        | 0.800119768  | 1.57470367  | 7.280225512  | 1.31E-12 | 17.47802001 |
| RP11-22C11.2 | 0.328885507  | 1.118712601 | 7.277572105  | 1.34E-12 | 17.46057154 |
| PCDHGA12     | -0.205666904 | 0.453989044 | -7.272910559 | 1.38E-12 | 17.42993022 |
| TMSB4X       | -0.476089223 | 9.947788495 | -7.272739811 | 1.38E-12 | 17.42880816 |
| PTPRJ        | -0.401611695 | 2.720381163 | -7.272736909 | 1.38E-12 | 17.42878909 |
| MEF2A        | -0.258836387 | 2.956847547 | -7.272272553 | 1.38E-12 | 17.42573771 |
| TMEM9        | 0.424389119  | 5.191421815 | 7.272202342  | 1.39E-12 | 17.42527635 |
| HOOK1        | 0.406046117  | 2.75922016  | 7.272060358  | 1.39E-12 | 17.42434339 |
| RP3-460G2.2  | -0.467800406 | 1.039811067 | -7.27140733  | 1.39E-12 | 17.42005256 |
| IGHV1-17     | -0.495714484 | 0.772153344 | -7.271249943 | 1.39E-12 | 17.41901847 |
| MMP7         | -1.233244395 | 4.292428984 | -7.269711775 | 1.41E-12 | 17.40891312 |
| EFEMP1       | -0.702428034 | 4.518698235 | -7.26740505  | 1.43E-12 | 17.39376177 |
| ARAP2        | -0.340238115 | 1.660157989 | -7.266057771 | 1.44E-12 | 17.38491419 |
| HSPE1        | 0.400439988  | 5.444209881 | 7.264744544  | 1.46E-12 | 17.3762915  |
| PPM1K        | -0.341303786 | 1.654220028 | -7.264443573 | 1.46E-12 | 17.37431549 |
| CD248        | -0.564400838 | 3.622264144 | -7.263175805 | 1.47E-12 | 17.36599276 |
| NTN4         | -0.610417475 | 3.506674958 | -7.258859879 | 1.51E-12 | 17.33766806 |

|              |              |             |              |          |             |
|--------------|--------------|-------------|--------------|----------|-------------|
| LTBP1        | -0.587043701 | 3.411985465 | -7.257596838 | 1.53E-12 | 17.32938151 |
| ACTG2        | -0.658201205 | 2.11577933  | -7.255861265 | 1.55E-12 | 17.31799666 |
| NRP2         | -0.542705787 | 2.695374233 | -7.250995473 | 1.60E-12 | 17.28609025 |
| CBX7         | -0.417870622 | 2.072988888 | -7.250281654 | 1.60E-12 | 17.28141099 |
| C12orf73     | 0.261692721  | 1.7789114   | 7.249633151  | 1.61E-12 | 17.27716021 |
| RP11-170L3.7 | -0.652356349 | 1.130555787 | -7.248842612 | 1.62E-12 | 17.27197884 |
| SERPINB8     | -0.333867709 | 2.036929603 | -7.248835077 | 1.62E-12 | 17.27192946 |
| SCRIB        | 0.499129357  | 4.26513939  | 7.244678367  | 1.66E-12 | 17.24469296 |
| GPRIN3       | -0.395793336 | 1.438443272 | -7.243719613 | 1.68E-12 | 17.2384126  |
| RP11-435O5.2 | 0.262417539  | 1.009565106 | 7.243184447  | 1.68E-12 | 17.23490726 |
| RORA         | -0.285337636 | 1.038369908 | -7.241660188 | 1.70E-12 | 17.22492451 |
| SNCA         | -0.282836464 | 0.70905093  | -7.239357579 | 1.73E-12 | 17.20984738 |
| C1QTNF2      | -0.248599533 | 0.623168002 | -7.238347874 | 1.74E-12 | 17.20323721 |
| STARD10      | 0.544183641  | 4.742563423 | 7.23720494   | 1.75E-12 | 17.19575573 |
| CD34         | -0.426508013 | 2.537394108 | -7.233252568 | 1.80E-12 | 17.16989147 |
| DDX1         | 0.256015028  | 4.825575818 | 7.232941329  | 1.80E-12 | 17.16785521 |
| IFI35        | -0.514965288 | 4.491504892 | -7.232932208 | 1.80E-12 | 17.16779554 |
| PLEKHG1      | -0.406013346 | 2.142535042 | -7.232599521 | 1.80E-12 | 17.16561904 |
| RP4-564M11.2 | -0.200018514 | 0.363959402 | -7.230103669 | 1.83E-12 | 17.1492933  |
| ESYT1        | -0.286357538 | 4.656311914 | -7.224986085 | 1.90E-12 | 17.11583268 |
| SCARF2       | -0.4725125   | 2.02623675  | -7.222694549 | 1.93E-12 | 17.10085601 |
| IGKV5-2      | -1.027220195 | 2.301583098 | -7.219816994 | 1.96E-12 | 17.08205476 |
| CARD6        | -0.404800188 | 2.288691216 | -7.218658639 | 1.98E-12 | 17.07448806 |
| ACP1         | 0.256255901  | 4.450590195 | 7.217533004  | 2.00E-12 | 17.06713604 |
| AC246787.4   | -0.907867859 | 1.936459543 | -7.216379198 | 2.01E-12 | 17.05960099 |
| ENO3         | 0.735487687  | 1.459524528 | 7.213357142  | 2.05E-12 | 17.03986976 |
| NUDT15       | 0.315550727  | 3.451133942 | 7.2108484    | 2.09E-12 | 17.02349507 |
| FOXF2        | -0.533084724 | 1.897876471 | -7.203252874 | 2.19E-12 | 16.97394683 |
| SFXN4        | 0.354288458  | 3.873643264 | 7.203224562  | 2.19E-12 | 16.97376222 |
| ODC1         | 0.912544464  | 5.708679375 | 7.196999046  | 2.29E-12 | 16.93318272 |
| PAG1         | -0.500794755 | 2.244807136 | -7.193061756 | 2.35E-12 | 16.90753314 |
| FCRL2        | -0.407792466 | 0.737366596 | -7.189896632 | 2.40E-12 | 16.88692211 |
| HBEGF        | -0.593165419 | 2.9464706   | -7.186191487 | 2.46E-12 | 16.86280386 |

|               |              |             |              |          |             |
|---------------|--------------|-------------|--------------|----------|-------------|
| OARD1         | 0.239774487  | 2.416994029 | 7.185117716  | 2.47E-12 | 16.85581615 |
| TGFB111       | -0.410000809 | 2.353665899 | -7.184589876 | 2.48E-12 | 16.85238147 |
| PRKCQ         | -0.395209463 | 1.207804383 | -7.183588821 | 2.50E-12 | 16.84586811 |
| FN3K          | 0.454675849  | 2.916963224 | 7.183549383  | 2.50E-12 | 16.84561152 |
| TIAM1         | -0.390835933 | 1.277984475 | -7.177212983 | 2.61E-12 | 16.80440106 |
| CSK           | -0.297614897 | 4.072128521 | -7.176285648 | 2.62E-12 | 16.79837238 |
| MMRN2         | -0.418102262 | 2.291027508 | -7.17231544  | 2.69E-12 | 16.77256882 |
| CEBPZOS       | 0.281400567  | 3.55677554  | 7.170549267  | 2.73E-12 | 16.76109368 |
| TXNDC15       | -0.28839544  | 3.501375152 | -7.169638151 | 2.74E-12 | 16.75517488 |
| AC007249.3    | 0.335752225  | 0.546854836 | 7.165220525  | 2.82E-12 | 16.72648576 |
| IGHV3-43      | -1.135712873 | 3.404870306 | -7.162716468 | 2.87E-12 | 16.71023019 |
| CCDC183       | 0.243729234  | 0.579381659 | 7.160941414  | 2.90E-12 | 16.69870988 |
| ACER3         | -0.256581353 | 2.241136445 | -7.157647209 | 2.97E-12 | 16.67733625 |
| SNX29         | -0.288588579 | 1.950364832 | -7.154279453 | 3.03E-12 | 16.65549367 |
| IGHV1OR21-1   | -0.63800038  | 1.160307577 | -7.150406981 | 3.11E-12 | 16.63038792 |
| JAM3          | -0.450588    | 2.159716406 | -7.148290277 | 3.16E-12 | 16.61666972 |
| COL10A1       | -0.921325746 | 3.455970957 | -7.147795593 | 3.17E-12 | 16.61346419 |
| EDIL3         | -0.713626186 | 2.90803671  | -7.143331979 | 3.26E-12 | 16.58454829 |
| SSH1          | -0.301800759 | 2.347579688 | -7.142090189 | 3.29E-12 | 16.57650643 |
| SIGLEC16      | -0.207313735 | 0.385557199 | -7.140696003 | 3.32E-12 | 16.56747899 |
| AACS          | 0.300769707  | 1.886898761 | 7.139748398  | 3.34E-12 | 16.561344   |
| TRAJ10        | -0.225148474 | 0.225632528 | -7.136135265 | 3.42E-12 | 16.53795795 |
| GLDN          | -0.341508865 | 0.780654147 | -7.132250937 | 3.51E-12 | 16.51282733 |
| UQCC2         | 0.399410363  | 3.274073769 | 7.129788978  | 3.57E-12 | 16.49690484 |
| STOM          | -0.488559858 | 6.244500431 | -7.127596127 | 3.62E-12 | 16.48272655 |
| MAGEF1        | 0.363653409  | 4.885755456 | 7.127207266  | 3.63E-12 | 16.48021266 |
| RP11-295P22.2 | -0.709548254 | 1.292585391 | -7.124116415 | 3.70E-12 | 16.4602351  |
| PGAP2         | 0.266116702  | 3.001888234 | 7.122809955  | 3.73E-12 | 16.45179298 |
| IGHV3OR16-16  | -0.343368906 | 0.445592328 | -7.11995225  | 3.81E-12 | 16.43333138 |
| ITGAV         | -0.517898178 | 4.496529438 | -7.119119012 | 3.83E-12 | 16.42794956 |
| GNG7          | -0.392129338 | 1.428616511 | -7.118042466 | 3.85E-12 | 16.42099698 |
| HLA-L         | -0.419060942 | 1.341643514 | -7.118007285 | 3.85E-12 | 16.42076979 |
| SLC22A4       | -0.39091329  | 1.107583756 | -7.115532119 | 3.92E-12 | 16.40478794 |

|               |              |             |              |          |             |
|---------------|--------------|-------------|--------------|----------|-------------|
| AFAP1L1       | -0.362151311 | 1.788760537 | -7.115022945 | 3.93E-12 | 16.40150082 |
| SUCNR1        | -0.566563672 | 1.177060486 | -7.111922079 | 4.01E-12 | 16.38148645 |
| HID1          | 0.510430911  | 3.802925466 | 7.111831011  | 4.01E-12 | 16.38089877 |
| PKNOX2        | -0.271547376 | 0.568407397 | -7.107799124 | 4.12E-12 | 16.35488608 |
| IGLV7-46      | -1.154054846 | 4.076457525 | -7.105257947 | 4.19E-12 | 16.33849724 |
| SAA1          | -1.21540702  | 3.108153125 | -7.104231365 | 4.22E-12 | 16.33187785 |
| ATIC          | 0.295349203  | 4.727434045 | 7.103793529  | 4.23E-12 | 16.32905492 |
| GNA15         | -0.469416212 | 3.541354855 | -7.103645306 | 4.24E-12 | 16.32809929 |
| TNNI2         | -0.563045432 | 1.267657184 | -7.100135451 | 4.34E-12 | 16.30547519 |
| AC104654.2    | -0.211564619 | 0.396621403 | -7.099785736 | 4.35E-12 | 16.30322147 |
| CHRNA5        | 0.491284905  | 0.996133793 | 7.099379065  | 4.36E-12 | 16.30060081 |
| NDUFA10       | 0.243030299  | 3.247252614 | 7.093418602  | 4.53E-12 | 16.26220461 |
| ATG4D         | 0.307576461  | 2.996140153 | 7.091419754  | 4.59E-12 | 16.24933429 |
| TRAJ17        | -0.222870517 | 0.213504992 | -7.090779299 | 4.61E-12 | 16.24521111 |
| IGLV1-36      | -1.203057541 | 3.349190611 | -7.089603286 | 4.65E-12 | 16.23764086 |
| ZNFX1         | -0.359832577 | 3.474130234 | -7.089129196 | 4.66E-12 | 16.23458933 |
| ARHGEF16      | 0.42136485   | 2.963874034 | 7.087808227  | 4.70E-12 | 16.22608765 |
| KLHDC7B       | -0.565366917 | 1.383043706 | -7.085337188 | 4.78E-12 | 16.21018765 |
| ITGAE         | -0.318068043 | 1.955960234 | -7.083783571 | 4.83E-12 | 16.20019316 |
| BCCIP         | 0.275003994  | 3.600694612 | 7.083050393  | 4.85E-12 | 16.19547721 |
| ITGA1         | -0.423097409 | 2.271044708 | -7.077987791 | 5.01E-12 | 16.16292442 |
| RBM43         | -0.308732259 | 1.946001268 | -7.077777921 | 5.02E-12 | 16.16157535 |
| MEIS3         | -0.319317747 | 1.044621244 | -7.069725375 | 5.29E-12 | 16.10983747 |
| IGLV6-57      | -1.265648663 | 5.565765636 | -7.067768209 | 5.36E-12 | 16.09726988 |
| KCNJ11        | 0.513911341  | 1.34137512  | 7.064247259  | 5.49E-12 | 16.07466789 |
| IGHV1-69      | -1.275389074 | 4.04388804  | -7.063399517 | 5.52E-12 | 16.06922735 |
| IGKV1D-42     | -0.671139231 | 1.207616476 | -7.061443381 | 5.59E-12 | 16.05667556 |
| C1orf35       | 0.304659456  | 2.663476234 | 7.05988149   | 5.64E-12 | 16.04665553 |
| MAP7D1        | -0.349351984 | 4.388116822 | -7.058353646 | 5.70E-12 | 16.03685567 |
| RP11-650L12.2 | 0.395934103  | 0.64370187  | 7.057586451  | 5.73E-12 | 16.0319354  |
| AC016700.5    | 0.389290203  | 1.020271715 | 7.052854237  | 5.91E-12 | 16.00159585 |
| ADTRP         | -0.410075028 | 0.916753205 | -7.04570055  | 6.19E-12 | 15.95576316 |
| MAP3K5        | -0.400962463 | 2.999895438 | -7.045207075 | 6.21E-12 | 15.95260293 |

|                |              |             |              |          |             |
|----------------|--------------|-------------|--------------|----------|-------------|
| KCTD10         | -0.208860286 | 3.0732105   | -7.045018476 | 6.22E-12 | 15.95139519 |
| OPLAH          | 0.521657756  | 2.828455528 | 7.04034896   | 6.41E-12 | 15.92150112 |
| GALNT15        | -0.339885941 | 0.741756937 | -7.038039397 | 6.51E-12 | 15.90672138 |
| FCER1A         | -0.848361852 | 1.900700379 | -7.034319844 | 6.67E-12 | 15.88292694 |
| ESRP2          | 0.44297362   | 3.841871388 | 7.033154781  | 6.72E-12 | 15.875476   |
| TXNL4A         | 0.283243063  | 3.169872778 | 7.032449215  | 6.75E-12 | 15.87096418 |
| ZDHHC14        | -0.215012586 | 0.794827151 | -7.031076821 | 6.81E-12 | 15.86218932 |
| ZBTB46         | -0.274504404 | 1.549852985 | -7.027495199 | 6.97E-12 | 15.83929561 |
| RP11-283G6.3   | -0.28011261  | 0.556120686 | -7.026231567 | 7.03E-12 | 15.83122076 |
| NRP1           | -0.484671364 | 3.910798536 | -7.024797398 | 7.10E-12 | 15.82205759 |
| RP11-134L10.1  | -0.204200954 | 0.756564168 | -7.023948455 | 7.14E-12 | 15.81663425 |
| CTD-2033D15.2  | -0.34012813  | 0.680313488 | -7.022065063 | 7.22E-12 | 15.80460443 |
| SLC38A5        | -0.546895421 | 2.261659687 | -7.020522611 | 7.30E-12 | 15.79475426 |
| RCOR2          | 0.562232673  | 1.255831159 | 7.019264171  | 7.36E-12 | 15.78671912 |
| RP11-1399P15.1 | -0.264070606 | 0.563687547 | -7.017164859 | 7.46E-12 | 15.77331765 |
| ACE            | -0.458242738 | 2.367870341 | -7.016273173 | 7.50E-12 | 15.76762634 |
| MICAL1         | -0.433516331 | 2.918139605 | -7.011984972 | 7.71E-12 | 15.7402646  |
| NOX4           | -0.302747985 | 0.837500663 | -7.009382669 | 7.85E-12 | 15.72366676 |
| MIR4539        | -0.620731971 | 1.041112985 | -7.009274609 | 7.85E-12 | 15.72297765 |
| BRIX1          | 0.377976782  | 3.241438641 | 7.00505489   | 8.07E-12 | 15.69607478 |
| PPP1R16A       | 0.412835401  | 2.700012231 | 7.001655159  | 8.25E-12 | 15.67440942 |
| IGKV1OR2-11    | -0.503022997 | 0.761291747 | -7.000492676 | 8.31E-12 | 15.66700328 |
| RP11-705C15.2  | -0.351577238 | 1.70149668  | -6.998777204 | 8.41E-12 | 15.6560759  |
| COL1A1         | -0.946778055 | 7.654327923 | -6.998403834 | 8.43E-12 | 15.65369787 |
| TCN2           | -0.504110309 | 4.125982861 | -6.99604748  | 8.56E-12 | 15.63869238 |
| PRPF40B        | 0.235650001  | 1.077521093 | 6.995394868  | 8.59E-12 | 15.63453721 |
| RELB           | -0.382877559 | 3.320846465 | -6.995017    | 8.61E-12 | 15.63213148 |
| ERAP2          | -0.790364014 | 2.608569129 | -6.993499198 | 8.70E-12 | 15.62246934 |
| VASN           | -0.633350668 | 3.748564418 | -6.991140224 | 8.83E-12 | 15.6074558  |
| FAM65A         | -0.388981093 | 3.127233754 | -6.990998189 | 8.84E-12 | 15.60655196 |
| PAX5           | -0.362351894 | 0.589410727 | -6.989821114 | 8.91E-12 | 15.59906223 |
| HCG4P11        | -0.206322575 | 0.382124623 | -6.987697813 | 9.03E-12 | 15.58555427 |
| HSPA7          | -0.636472185 | 2.129177081 | -6.987100451 | 9.07E-12 | 15.58175459 |

|              |              |             |              |          |             |
|--------------|--------------|-------------|--------------|----------|-------------|
| VSTM1        | -0.208412302 | 0.291815654 | -6.981828572 | 9.38E-12 | 15.548233   |
| GRN          | -0.372284039 | 7.445910374 | -6.981717034 | 9.39E-12 | 15.547524   |
| PPT1         | -0.355608628 | 6.001479463 | -6.981653999 | 9.39E-12 | 15.54712333 |
| S1PR2        | -0.323329625 | 2.674613122 | -6.977569068 | 9.65E-12 | 15.52116383 |
| IGLV2-5      | -0.541169125 | 0.992970514 | -6.977382951 | 9.66E-12 | 15.51998137 |
| RRS1         | 0.415376151  | 3.992329973 | 6.975435745  | 9.78E-12 | 15.50761166 |
| SETD6        | 0.263749818  | 1.974251872 | 6.973398719  | 9.91E-12 | 15.49467439 |
| KLF2         | -0.594147155 | 3.439776663 | -6.971028182 | 1.01E-11 | 15.47962289 |
| SESN1        | -0.351692087 | 2.172846772 | -6.970460433 | 1.01E-11 | 15.47601864 |
| SH3BP1       | -0.339142125 | 2.225204896 | -6.96834726  | 1.02E-11 | 15.46260568 |
| ADAMTSL2     | -0.510544638 | 2.226938416 | -6.968230271 | 1.02E-11 | 15.46186322 |
| PARP12       | -0.357351813 | 3.318036322 | -6.965678806 | 1.04E-11 | 15.44567296 |
| S100A3       | -0.439854952 | 1.309917691 | -6.964895001 | 1.05E-11 | 15.44070033 |
| IGHV1-24     | -1.35178899  | 5.289030212 | -6.960427634 | 1.08E-11 | 15.41236713 |
| TLN1         | -0.364599084 | 5.208713307 | -6.956325663 | 1.11E-11 | 15.38636452 |
| IGLV3-13     | -0.403310753 | 0.596008223 | -6.955508628 | 1.11E-11 | 15.3811868  |
| NETO1        | -0.240388688 | 0.293418672 | -6.954136704 | 1.12E-11 | 15.37249375 |
| IGKV1OR22-1  | -0.683798809 | 1.205409537 | -6.953572522 | 1.13E-11 | 15.36891928 |
| TRAF4        | 0.360785414  | 4.652174207 | 6.949193346  | 1.16E-11 | 15.34118239 |
| RP3-325F22.5 | 0.310567033  | 0.680526736 | 6.94903785   | 1.16E-11 | 15.34019777 |
| OTX1         | 0.377282493  | 1.105015096 | 6.946036999  | 1.18E-11 | 15.3211996  |
| GRASP        | -0.421886292 | 1.907438033 | -6.945163209 | 1.19E-11 | 15.31566896 |
| N4BP1        | -0.247386409 | 3.228903799 | -6.943278974 | 1.20E-11 | 15.30374468 |
| GOS2         | -0.860537158 | 4.358772471 | -6.943143251 | 1.21E-11 | 15.30288587 |
| GMCL1        | 0.253037761  | 3.157897143 | 6.941074879  | 1.22E-11 | 15.28979956 |
| RP11-673E1.3 | -0.219539162 | 0.460495273 | -6.940532896 | 1.23E-11 | 15.28637104 |
| MPHOSPH10    | 0.211700356  | 3.311387608 | 6.94024565   | 1.23E-11 | 15.28455404 |
| TACC1        | -0.459639625 | 3.022248468 | -6.940037592 | 1.23E-11 | 15.283238   |
| LINC00944    | -0.244210405 | 0.442455425 | -6.934492952 | 1.27E-11 | 15.24817796 |
| FRZB         | -0.570241986 | 2.386261106 | -6.934457788 | 1.27E-11 | 15.24795569 |
| AC096579.13  | -0.269330508 | 0.432042596 | -6.933188422 | 1.28E-11 | 15.23993247 |
| RHBDD3       | 0.351803828  | 3.114595749 | 6.933080868  | 1.29E-11 | 15.23925271 |
| DANCR        | 0.453618741  | 3.521617231 | 6.932353578  | 1.29E-11 | 15.23465637 |

|              |              |             |              |          |             |
|--------------|--------------|-------------|--------------|----------|-------------|
| UNC13D       | -0.615467482 | 2.995778757 | -6.928796518 | 1.32E-11 | 15.21218212 |
| PCDH12       | -0.355665144 | 1.832398313 | -6.927606714 | 1.33E-11 | 15.20466681 |
| RGCC         | -0.536483629 | 5.241389482 | -6.927223391 | 1.34E-11 | 15.2022458  |
| LRPPRC       | 0.298081521  | 4.056391538 | 6.927070438  | 1.34E-11 | 15.2012798  |
| BYSL         | 0.374815492  | 3.621213619 | 6.926246135  | 1.34E-11 | 15.19607411 |
| CX3CL1       | -0.859628026 | 3.557757168 | -6.925388841 | 1.35E-11 | 15.19066061 |
| AFAP1L2      | -0.539352838 | 1.958012779 | -6.924053472 | 1.36E-11 | 15.18222933 |
| TNFSF18      | -0.207673752 | 0.436092702 | -6.917439158 | 1.42E-11 | 15.14048752 |
| CLUH         | 0.37426815   | 3.664036851 | 6.914981391  | 1.44E-11 | 15.12498534 |
| DCHS1        | -0.390415362 | 1.683118399 | -6.91462224  | 1.45E-11 | 15.1227204  |
| 1-Mar        | 0.525332211  | 1.57869471  | 6.913962517  | 1.45E-11 | 15.1185602  |
| OSBPL8       | -0.315384984 | 3.071042891 | -6.912048458 | 1.47E-11 | 15.10649203 |
| SYNC         | -0.218544833 | 0.695153512 | -6.909768489 | 1.49E-11 | 15.09212039 |
| PXN-AS1      | 0.237265376  | 1.259893942 | 6.906796464  | 1.52E-11 | 15.07339228 |
| IGHVIII-51-1 | -0.251196687 | 0.335234663 | -6.90624213  | 1.53E-11 | 15.0698999  |
| GALC         | -0.342930011 | 2.784670217 | -6.905084111 | 1.54E-11 | 15.06260496 |
| IGHG3        | -1.190669152 | 7.590767077 | -6.903508443 | 1.56E-11 | 15.05268067 |
| MORC3        | -0.241255879 | 2.558716118 | -6.89918582  | 1.60E-11 | 15.02546437 |
| MOSPD2       | -0.250339098 | 2.123546251 | -6.89606153  | 1.63E-11 | 15.00580182 |
| CCDC88B      | -0.431470787 | 2.006990345 | -6.894110553 | 1.65E-11 | 14.99352717 |
| SKAP2        | -0.414133473 | 3.58006395  | -6.893844678 | 1.66E-11 | 14.99185463 |
| RP11-465N4.4 | 0.362323898  | 1.714674468 | 6.892354111  | 1.67E-11 | 14.9824789  |
| AGRP         | -0.323375911 | 0.586559454 | -6.886176922 | 1.74E-11 | 14.94364196 |
| IGKV2D-28    | -0.64361593  | 0.823460839 | -6.882455915 | 1.78E-11 | 14.92026129 |
| RRAD         | -0.8950507   | 3.377252591 | -6.878745165 | 1.82E-11 | 14.89695545 |
| SLC25A46     | -0.280348367 | 2.63527875  | -6.878002782 | 1.83E-11 | 14.89229407 |
| IGHV4-4      | -1.043022388 | 2.534728383 | -6.877481459 | 1.84E-11 | 14.88902095 |
| HLA-DRB9     | -0.361874105 | 0.886276581 | -6.877438751 | 1.84E-11 | 14.88875282 |
| ANKRD33B     | -0.25111445  | 0.474001858 | -6.876798657 | 1.85E-11 | 14.88473431 |
| SNX3         | -0.299101334 | 6.05797517  | -6.870466532 | 1.92E-11 | 14.84499785 |
| ANGPT1       | -0.431132573 | 1.203529304 | -6.868889623 | 1.94E-11 | 14.83510686 |
| PDCL3        | 0.269731405  | 3.7673922   | 6.868122686  | 1.95E-11 | 14.83029701 |
| CSF2         | -0.627325932 | 1.345401384 | -6.867427732 | 1.96E-11 | 14.82593898 |

|               |              |             |              |          |             |
|---------------|--------------|-------------|--------------|----------|-------------|
| ICAM1         | -0.758889852 | 6.082233247 | -6.865752509 | 1.98E-11 | 14.81543523 |
| IGHD2-2       | -0.643595694 | 0.989816269 | -6.863503653 | 2.01E-11 | 14.80133809 |
| TBC1D1        | -0.384032306 | 2.402435843 | -6.860762882 | 2.05E-11 | 14.7841625  |
| IGKV1OR10-1   | -0.345006234 | 0.540370928 | -6.860699235 | 2.05E-11 | 14.78376371 |
| PCAT6         | 0.515235889  | 2.495952776 | 6.859510232  | 2.06E-11 | 14.77631441 |
| FAM110D       | -0.268818067 | 0.844733777 | -6.856992167 | 2.10E-11 | 14.76054183 |
| STX7          | -0.219992694 | 2.256774448 | -6.856471384 | 2.10E-11 | 14.75728036 |
| GMEB2         | 0.270869786  | 2.674196684 | 6.852673779  | 2.15E-11 | 14.73350359 |
| CYTL1         | -0.430813127 | 0.975584568 | -6.851472429 | 2.17E-11 | 14.72598422 |
| F8            | -0.295015816 | 1.409791011 | -6.84710413  | 2.23E-11 | 14.69865177 |
| IGHG4         | -1.315656198 | 7.049065058 | -6.841770739 | 2.31E-11 | 14.66530029 |
| PARP8         | -0.287259267 | 2.238885207 | -6.839917273 | 2.34E-11 | 14.65371498 |
| C19orf45      | 0.218011058  | 0.325625861 | 6.839658094  | 2.34E-11 | 14.65209516 |
| SNRPE         | 0.329696206  | 5.134647075 | 6.838842786  | 2.35E-11 | 14.64699996 |
| LAMB1         | -0.517793886 | 4.088714036 | -6.837356012 | 2.38E-11 | 14.63770979 |
| VAMP3         | -0.239066354 | 5.353901291 | -6.834609237 | 2.42E-11 | 14.62055085 |
| FAM83H-AS1    | 0.515347228  | 3.579962725 | 6.832766401  | 2.45E-11 | 14.60904195 |
| EPN3          | 0.502544851  | 2.248889542 | 6.83101218   | 2.47E-11 | 14.59808887 |
| SOX12         | 0.447657576  | 2.954950641 | 6.828206543  | 2.52E-11 | 14.58057574 |
| GLI1          | -0.263247765 | 0.561935144 | -6.824686436 | 2.58E-11 | 14.55861124 |
| CREB3L4       | 0.433302713  | 3.247013587 | 6.821152693  | 2.63E-11 | 14.53657108 |
| IGHVIII-67-2  | -0.44543405  | 0.55203561  | -6.819366107 | 2.66E-11 | 14.52543164 |
| NUB1          | -0.246309373 | 4.122994009 | -6.818708433 | 2.68E-11 | 14.52133162 |
| IGLV3-12      | -0.693243932 | 1.322447788 | -6.817655944 | 2.69E-11 | 14.51477096 |
| PDE2A         | -0.263937203 | 0.846750344 | -6.815764251 | 2.73E-11 | 14.50298126 |
| DDX27         | 0.290825572  | 3.833235139 | 6.813838038  | 2.76E-11 | 14.4909792  |
| TMEM255B      | -0.253123921 | 0.944685588 | -6.813805401 | 2.76E-11 | 14.49077587 |
| RGL3          | 0.52760555   | 2.746539782 | 6.812700609  | 2.78E-11 | 14.48389331 |
| CD1A          | -0.848605976 | 1.664552261 | -6.812237959 | 2.79E-11 | 14.4810114  |
| HHEX          | -0.373020214 | 2.08002871  | -6.812185903 | 2.79E-11 | 14.48068714 |
| CTD-2319I12.2 | -0.222818899 | 0.699043714 | -6.812122993 | 2.79E-11 | 14.48029528 |
| P2RX5         | -0.280102614 | 0.626872351 | -6.809379164 | 2.84E-11 | 14.46320715 |
| IGKV2-26      | -0.479437779 | 0.691972465 | -6.804071    | 2.94E-11 | 14.43016496 |



|               |              |             |              |          |             |
|---------------|--------------|-------------|--------------|----------|-------------|
| TPD52         | 0.450291515  | 3.7983584   | 6.801495514  | 2.98E-11 | 14.4141408  |
| C14orf93      | 0.203707306  | 1.871176796 | 6.800838788  | 3.00E-11 | 14.41005559 |
| RP11-876N24.4 | -0.244798194 | 0.818053437 | -6.800650488 | 3.00E-11 | 14.40888431 |
| CHTOP         | 0.234928944  | 4.180462129 | 6.794541043  | 3.12E-11 | 14.37089661 |
| SORBS1        | -0.375902939 | 1.594721132 | -6.790300221 | 3.20E-11 | 14.34454441 |
| IGHV3OR16-11  | -0.431634653 | 0.603413533 | -6.788431001 | 3.24E-11 | 14.33293353 |
| SLC2A3        | -0.623823028 | 3.160499798 | -6.788299924 | 3.25E-11 | 14.33211943 |
| AC133528.2    | 0.381261198  | 3.12179364  | 6.787280437  | 3.27E-11 | 14.32578798 |
| HNMT          | -0.470517905 | 3.446755582 | -6.787182933 | 3.27E-11 | 14.32518249 |
| ID2           | -0.511774278 | 4.191295645 | -6.786653421 | 3.28E-11 | 14.32189434 |
| WDR74         | 0.230040088  | 2.916067597 | 6.78640614   | 3.28E-11 | 14.32035886 |
| LIPT2         | 0.26959227   | 1.268586929 | 6.785540594  | 3.30E-11 | 14.31498465 |
| FRMD4B        | -0.304285772 | 1.977522442 | -6.785198967 | 3.31E-11 | 14.31286363 |
| TLR3          | -0.411510254 | 1.670425309 | -6.783872271 | 3.34E-11 | 14.30462756 |
| PIM1          | -0.392360082 | 4.266878117 | -6.780217402 | 3.42E-11 | 14.28194523 |
| DTHD1         | -0.340288625 | 0.438677988 | -6.779075509 | 3.44E-11 | 14.27486066 |
| AC112721.2    | -0.253229393 | 0.341518474 | -6.778186631 | 3.46E-11 | 14.26934653 |
| KCNJ10        | -0.241586555 | 0.354859406 | -6.777773832 | 3.47E-11 | 14.26678595 |
| NOTCH2        | -0.443736433 | 3.384928987 | -6.776659947 | 3.49E-11 | 14.2598772  |
| FAM198A       | -0.203593543 | 0.52605089  | -6.776559772 | 3.50E-11 | 14.25925592 |
| THPO          | 0.556671834  | 0.857271309 | 6.772061584  | 3.60E-11 | 14.23136634 |
| EHD1          | -0.369949039 | 3.635430994 | -6.769808056 | 3.65E-11 | 14.21739984 |
| PNPLA6        | -0.316656951 | 3.365258133 | -6.767852525 | 3.69E-11 | 14.20528334 |
| RP2           | -0.291969762 | 2.784710245 | -6.76683287  | 3.72E-11 | 14.19896669 |
| TKT           | 0.424239869  | 5.813937729 | 6.766694845  | 3.72E-11 | 14.19811171 |
| S100A4        | -0.74741775  | 6.928383455 | -6.763933809 | 3.79E-11 | 14.18101166 |
| RP11-20G13.3  | -0.229767859 | 0.31050444  | -6.763293475 | 3.80E-11 | 14.17704668 |
| IGHV4OR15-8   | -0.319044715 | 0.45674211  | -6.761518886 | 3.84E-11 | 14.16605997 |
| AGPAT4        | -0.263883099 | 0.963160229 | -6.759077283 | 3.90E-11 | 14.15094761 |
| PTPRD         | -0.267091955 | 0.6613998   | -6.757275095 | 3.95E-11 | 14.13979583 |
| MCAT          | 0.239793533  | 2.873437338 | 6.756223398  | 3.98E-11 | 14.13328917 |
| TMEM173       | -0.510355054 | 4.742482618 | -6.756112681 | 3.98E-11 | 14.13260423 |
| PCDH17        | -0.377142561 | 1.679320795 | -6.75384284  | 4.04E-11 | 14.11856419 |

|               |              |             |              |          |             |
|---------------|--------------|-------------|--------------|----------|-------------|
| ZMYND19       | 0.299599204  | 3.167930373 | 6.753137285  | 4.05E-11 | 14.11420079 |
| STS           | -0.511276816 | 2.737831076 | -6.7527064   | 4.07E-11 | 14.11153624 |
| NEDD4L        | 0.45186716   | 2.847487181 | 6.75028389   | 4.13E-11 | 14.09655828 |
| IGLJ2         | -0.563380349 | 1.268727684 | -6.748905031 | 4.16E-11 | 14.08803503 |
| ACTR3B        | 0.214772623  | 1.139552737 | 6.746854722  | 4.22E-11 | 14.07536398 |
| SEMA6B        | -0.386719099 | 1.767688245 | -6.746441692 | 4.23E-11 | 14.07281181 |
| MAX           | -0.208591433 | 3.942005596 | -6.746414599 | 4.23E-11 | 14.0726444  |
| GCSAM         | -0.205216876 | 0.738263593 | -6.746041704 | 4.24E-11 | 14.07034036 |
| LEPROT        | -0.253153305 | 4.685201907 | -6.74577207  | 4.25E-11 | 14.0686744  |
| RP11-353N14.2 | 0.371584067  | 0.812624697 | 6.744525531  | 4.28E-11 | 14.0609733  |
| IFI44         | -0.720919881 | 3.919612191 | -6.744483265 | 4.28E-11 | 14.0607122  |
| FHL3          | -0.344706694 | 3.576739666 | -6.743439422 | 4.31E-11 | 14.05426429 |
| CLDN7         | 0.455823318  | 5.938220023 | 6.743404057  | 4.31E-11 | 14.05404585 |
| EHMT2         | 0.328265703  | 3.515246308 | 6.739869593  | 4.41E-11 | 14.03221942 |
| DFNA5         | -0.40911993  | 1.293902306 | -6.739354563 | 4.42E-11 | 14.02903975 |
| IGHV1-14      | -0.604063275 | 1.085233644 | -6.734000494 | 4.57E-11 | 13.99599693 |
| TYMP          | -0.51238589  | 5.342479278 | -6.732150818 | 4.63E-11 | 13.98458666 |
| NXPH3         | -0.207471467 | 0.515876296 | -6.726657647 | 4.79E-11 | 13.95071584 |
| EPYC          | -0.453726079 | 0.493987443 | -6.726051896 | 4.81E-11 | 13.9469822  |
| KLHL4         | -0.210628906 | 0.307166777 | -6.722299612 | 4.92E-11 | 13.92386063 |
| CNPY2         | 0.314623819  | 3.605616408 | 6.720320082  | 4.99E-11 | 13.9116671  |
| CDH13         | -0.319908134 | 0.918950628 | -6.719203317 | 5.02E-11 | 13.90478935 |
| DXO           | 0.319842251  | 2.843117357 | 6.7125123    | 5.24E-11 | 13.8636018  |
| MLF2          | 0.300249065  | 5.646519169 | 6.709165394  | 5.35E-11 | 13.84301226 |
| NID2          | -0.448807725 | 1.543300192 | -6.707972942 | 5.39E-11 | 13.83567858 |
| PCNX          | -0.260448308 | 2.018901191 | -6.702781744 | 5.57E-11 | 13.80376495 |
| CTD-2033A16.3 | 0.253888766  | 0.569114129 | 6.694602433  | 5.86E-11 | 13.75352328 |
| PAXIP1-AS2    | -0.242112061 | 1.430070711 | -6.693564748 | 5.90E-11 | 13.74715292 |
| KRTCAP3       | 0.591051579  | 4.978813632 | 6.693480284  | 5.90E-11 | 13.74663444 |
| GP1BA         | -0.243641239 | 0.641491768 | -6.692143499 | 5.95E-11 | 13.7384292  |
| PTX3          | -0.413900592 | 0.946029501 | -6.691781936 | 5.96E-11 | 13.73621016 |
| TMTC4         | 0.341248768  | 2.448979294 | 6.690929156  | 6.00E-11 | 13.73097671 |
| RP11-713C5.1  | -0.224707819 | 0.283445018 | -6.686995667 | 6.15E-11 | 13.70684441 |

|              |              |             |              |          |             |
|--------------|--------------|-------------|--------------|----------|-------------|
| ATOX1        | -0.253343987 | 2.941253276 | -6.686741781 | 6.16E-11 | 13.7052872  |
| FIG4         | -0.246152223 | 2.711797416 | -6.686218916 | 6.18E-11 | 13.70208037 |
| MAP3K1       | -0.302962314 | 2.523360223 | -6.686102243 | 6.18E-11 | 13.70136482 |
| RAB40B       | 0.354520401  | 2.00656147  | 6.683788422  | 6.27E-11 | 13.68717644 |
| LSM14B       | 0.315969264  | 3.99744366  | 6.683102696  | 6.30E-11 | 13.68297235 |
| KCTD17       | -0.365705598 | 2.587736816 | -6.682424497 | 6.32E-11 | 13.67881475 |
| PUF60        | 0.31614005   | 4.885343191 | 6.681662392  | 6.35E-11 | 13.67414321 |
| CYTH1        | -0.296029895 | 3.545705399 | -6.679916731 | 6.42E-11 | 13.66344435 |
| RELL1        | -0.38286835  | 1.645856309 | -6.67859431  | 6.48E-11 | 13.65534101 |
| HLA-J        | -0.554287951 | 1.857627647 | -6.673340959 | 6.69E-11 | 13.62316351 |
| VAX2         | 0.376210707  | 0.874077503 | 6.672536487  | 6.73E-11 | 13.61823787 |
| ACTA2-AS1    | -0.216642184 | 0.539321146 | -6.670956773 | 6.79E-11 | 13.60856701 |
| BBS12        | -0.21119331  | 1.299637085 | -6.667500771 | 6.94E-11 | 13.58741637 |
| TSACC        | 0.281986639  | 0.749327579 | 6.665705003  | 7.02E-11 | 13.57642993 |
| ANKRD36BP2   | -0.392338593 | 0.713145504 | -6.664215332 | 7.09E-11 | 13.56731805 |
| CHN1         | -0.392998722 | 1.984617214 | -6.662085522 | 7.18E-11 | 13.55429359 |
| PDGFC        | -0.441043066 | 2.809708604 | -6.661861023 | 7.19E-11 | 13.55292092 |
| HGH1         | 0.348177725  | 3.742090521 | 6.660886569  | 7.24E-11 | 13.54696315 |
| GNPTAB       | -0.285215067 | 3.155171325 | -6.659303108 | 7.31E-11 | 13.5372835  |
| PMF1         | 0.338847711  | 3.85371696  | 6.658871091  | 7.33E-11 | 13.53464292 |
| RPL7L1       | 0.248002648  | 3.965643465 | 6.656872538  | 7.42E-11 | 13.52242923 |
| CYC1         | 0.423769926  | 5.758076909 | 6.656017829  | 7.46E-11 | 13.51720681 |
| AKT3         | -0.392734034 | 1.671686542 | -6.655495119 | 7.48E-11 | 13.51401324 |
| COQ9         | 0.269192287  | 3.643254828 | 6.653303792  | 7.59E-11 | 13.5006273  |
| IER3IP1      | 0.333177572  | 4.054006851 | 6.653176896  | 7.59E-11 | 13.49985226 |
| FAM198B      | -0.553249442 | 2.656418571 | -6.649817617 | 7.75E-11 | 13.47933924 |
| IGHV3OR16-12 | -0.38585963  | 0.647764781 | -6.649628526 | 7.76E-11 | 13.47818484 |
| C10orf55     | -0.274295538 | 0.576084241 | -6.648823685 | 7.80E-11 | 13.47327158 |
| PID1         | -0.558626672 | 2.206423053 | -6.647872012 | 7.85E-11 | 13.46746261 |
| SDCBP        | -0.307977562 | 5.465220656 | -6.647496739 | 7.87E-11 | 13.46517215 |
| GJA4         | -0.421099398 | 2.48205468  | -6.647233124 | 7.88E-11 | 13.46356325 |
| MARVELD3     | 0.3185082    | 1.975745139 | 6.646919903  | 7.90E-11 | 13.46165167 |
| DES          | -0.724317748 | 1.928124216 | -6.646719554 | 7.91E-11 | 13.46042898 |

|               |              |             |              |          |             |
|---------------|--------------|-------------|--------------|----------|-------------|
| IGKV1D-33     | -0.647781753 | 0.857891084 | -6.646016571 | 7.94E-11 | 13.45613907 |
| RP11-148B3.2  | 0.584149124  | 0.646011237 | 6.63993164   | 8.25E-11 | 13.41902203 |
| RP11-27N21.3  | 0.365482648  | 0.963457403 | 6.639339493  | 8.28E-11 | 13.41541155 |
| UACA          | -0.351618766 | 2.143947426 | -6.637969293 | 8.35E-11 | 13.40705811 |
| DCP2          | -0.258607754 | 2.08392936  | -6.637355299 | 8.38E-11 | 13.40331535 |
| MCHR1         | -0.206213626 | 0.35720011  | -6.635099429 | 8.50E-11 | 13.38956662 |
| NDUFS1        | 0.238273835  | 3.102337648 | 6.630297208  | 8.76E-11 | 13.36031181 |
| SLC39A8       | -0.562989527 | 3.97477     | -6.624820036 | 9.06E-11 | 13.32696688 |
| IGHA2         | -1.131856295 | 7.202908233 | -6.621017776 | 9.28E-11 | 13.30383235 |
| ABCA8         | -0.346131662 | 0.699950839 | -6.620174111 | 9.33E-11 | 13.29870065 |
| FUCA1         | -0.43258395  | 5.737394016 | -6.618690952 | 9.41E-11 | 13.28968048 |
| FERMT2        | -0.336264766 | 2.617036525 | -6.618424467 | 9.43E-11 | 13.28805997 |
| ABLIM3        | -0.462678669 | 1.603693605 | -6.617569476 | 9.48E-11 | 13.28286109 |
| WRNIP1        | 0.253216796  | 4.077124031 | 6.617148351  | 9.50E-11 | 13.28030059 |
| CCAR1         | 0.23090012   | 3.712038277 | 6.615788171  | 9.58E-11 | 13.27203144 |
| UGDH          | 0.675226972  | 4.888623227 | 6.613798667  | 9.70E-11 | 13.25993891 |
| ALPK1         | -0.237990744 | 1.669186883 | -6.613460533 | 9.72E-11 | 13.25788398 |
| RETN          | -0.732111373 | 1.570184802 | -6.613403783 | 9.73E-11 | 13.25753911 |
| GTPBP4        | 0.329973115  | 3.361161196 | 6.613248833  | 9.74E-11 | 13.25659747 |
| CCDC3         | -0.512204863 | 2.429997487 | -6.6132171   | 9.74E-11 | 13.25640463 |
| IGKV1OR2-118  | -0.232058391 | 0.338470335 | -6.61155514  | 9.84E-11 | 13.24630605 |
| ZMYM6NB       | -0.327480962 | 2.91216958  | -6.609688062 | 9.95E-11 | 13.23496364 |
| ARHGAP39      | 0.383189601  | 2.167484081 | 6.607160224  | 1.01E-10 | 13.21961143 |
| RP11-314A20.2 | 0.205422175  | 0.434111129 | 6.606210667  | 1.02E-10 | 13.2138458  |
| MRPL48        | 0.289593602  | 2.574944584 | 6.604810363  | 1.03E-10 | 13.20534453 |
| CLEC14A       | -0.454580773 | 3.357062663 | -6.604648148 | 1.03E-10 | 13.20435982 |
| NT5C          | 0.328616117  | 3.910844992 | 6.603208815  | 1.04E-10 | 13.19562337 |
| CYP7B1        | -0.424149545 | 1.756961607 | -6.602703892 | 1.04E-10 | 13.19255896 |
| PLK3          | -0.330809389 | 2.780061513 | -6.6019398   | 1.04E-10 | 13.18792203 |
| GBP3          | -0.659350262 | 3.314203431 | -6.597474735 | 1.07E-10 | 13.16083452 |
| EXOSC4        | 0.390771705  | 4.028195766 | 6.597255589  | 1.08E-10 | 13.15950546 |
| RAP2B         | -0.355533364 | 3.667914032 | -6.594425645 | 1.09E-10 | 13.14234592 |
| MEOX1         | -0.266095041 | 0.468159141 | -6.593316776 | 1.10E-10 | 13.13562391 |

|               |              |             |              |          |             |
|---------------|--------------|-------------|--------------|----------|-------------|
| CDH5          | -0.445926255 | 2.94865313  | -6.593299444 | 1.10E-10 | 13.13551884 |
| CAST          | -0.303573021 | 4.400163296 | -6.593282994 | 1.10E-10 | 13.13541913 |
| RP11-26J3.3   | 0.297439804  | 1.130719596 | 6.590247588  | 1.12E-10 | 13.1170233  |
| CD320         | 0.415810253  | 4.015114868 | 6.58762697   | 1.14E-10 | 13.10114697 |
| IGHJ2P        | -0.427546133 | 0.592117224 | -6.587212127 | 1.14E-10 | 13.09863424 |
| AL122127.25   | -0.239294512 | 0.35347824  | -6.586911967 | 1.15E-10 | 13.09681623 |
| MFSD9         | 0.266483671  | 2.382014572 | 6.579379382  | 1.20E-10 | 13.05121569 |
| NPR3          | -0.430056121 | 1.419670315 | -6.57904787  | 1.20E-10 | 13.0492098  |
| PADI2         | -0.520762881 | 1.538898335 | -6.578727655 | 1.21E-10 | 13.04727234 |
| COA4          | 0.303073762  | 4.474751324 | 6.57773488   | 1.21E-10 | 13.04126608 |
| IGHV3-73      | -1.278367561 | 4.397344178 | -6.57772469  | 1.21E-10 | 13.04120443 |
| TLCD1         | 0.462318758  | 4.001789314 | 6.577625599  | 1.21E-10 | 13.04060497 |
| LSM4          | 0.31014658   | 4.800517631 | 6.57683868   | 1.22E-10 | 13.03584474 |
| CTD-2288O8.1  | -0.215324535 | 0.33668975  | -6.574466422 | 1.24E-10 | 13.02149736 |
| CTD-2020K17.1 | -0.413188483 | 1.133714047 | -6.573407952 | 1.25E-10 | 13.01509715 |
| CYB5R4        | -0.241281733 | 1.7650331   | -6.573056765 | 1.25E-10 | 13.01297383 |
| METRNL        | -0.438687893 | 3.72755823  | -6.5726533   | 1.25E-10 | 13.01053455 |
| RAMP3         | -0.504755339 | 3.131812419 | -6.572274216 | 1.25E-10 | 13.00824279 |
| MAMDC2        | -0.562573536 | 1.518617285 | -6.569907339 | 1.27E-10 | 12.99393628 |
| RP11-283G6.4  | -0.223949157 | 0.598215958 | -6.56844028  | 1.29E-10 | 12.98507087 |
| ITM2B         | -0.343576449 | 5.822466413 | -6.565516522 | 1.31E-10 | 12.96740762 |
| TALDO1        | 0.443223168  | 6.243689995 | 6.564735772  | 1.31E-10 | 12.96269199 |
| ACTB          | -0.283591049 | 10.76125893 | -6.564320978 | 1.32E-10 | 12.96018689 |
| TMEM177       | 0.248951298  | 2.450775851 | 6.564054006  | 1.32E-10 | 12.95857462 |
| CELF2         | -0.485529217 | 2.919451966 | -6.563621917 | 1.32E-10 | 12.95596529 |
| RP11-335K5.3  | 0.233941859  | 0.23571825  | 6.562777095  | 1.33E-10 | 12.95086394 |
| TFB2M         | 0.306346461  | 3.797486605 | 6.56153574   | 1.34E-10 | 12.94336919 |
| IGKV2D-30     | -0.594358104 | 0.908006033 | -6.560651563 | 1.35E-10 | 12.93803164 |
| CAMSAP3       | 0.390557883  | 2.85060184  | 6.557175408  | 1.38E-10 | 12.91705286 |
| MAST3         | -0.271073299 | 1.945079344 | -6.556434101 | 1.38E-10 | 12.91258024 |
| HRH1          | -0.31220554  | 1.76926212  | -6.554972175 | 1.40E-10 | 12.90376107 |
| ALDH18A1      | 0.31054144   | 4.924266162 | 6.554821038  | 1.40E-10 | 12.90284942 |
| BNIP2         | -0.235661449 | 3.02025572  | -6.554647894 | 1.40E-10 | 12.90180504 |

|               |              |             |              |          |             |
|---------------|--------------|-------------|--------------|----------|-------------|
| CPXM2         | -0.660918611 | 2.132979582 | -6.554000514 | 1.40E-10 | 12.89790037 |
| PHLDB2        | -0.418741542 | 1.499733266 | -6.55241049  | 1.42E-10 | 12.88831151 |
| PTCD1         | 0.200984495  | 1.256336547 | 6.551239926  | 1.43E-10 | 12.88125351 |
| CASQ2         | -0.235001536 | 0.382651501 | -6.549195685 | 1.45E-10 | 12.86893015 |
| IGKV1-27      | -1.12505419  | 4.93920293  | -6.547715971 | 1.46E-10 | 12.86001197 |
| TAPBPL        | -0.416065234 | 3.64144392  | -6.547704582 | 1.46E-10 | 12.85994334 |
| BAG6          | 0.266753188  | 5.738405166 | 6.547642787  | 1.46E-10 | 12.85957094 |
| MANEA         | -0.3076659   | 2.265892277 | -6.547205857 | 1.46E-10 | 12.85693792 |
| FNBP1L        | 0.337482303  | 3.956176074 | 6.546617972  | 1.47E-10 | 12.85339546 |
| PEMT          | 0.358662581  | 3.391948536 | 6.546356478  | 1.47E-10 | 12.85181984 |
| RP11-799B12.4 | 0.365574593  | 0.720534347 | 6.546198224  | 1.47E-10 | 12.85086632 |
| HRH2          | -0.26347164  | 0.580043046 | -6.546147569 | 1.47E-10 | 12.85056111 |
| THBD          | -0.541141241 | 3.193855753 | -6.544202535 | 1.49E-10 | 12.8388434  |
| THEM6         | 0.438785854  | 3.819012595 | 6.538426484  | 1.55E-10 | 12.80406327 |
| TRUB2         | 0.239216086  | 2.902060772 | 6.53583475   | 1.57E-10 | 12.7884657  |
| RP11-148O21.4 | -0.207193295 | 0.240175103 | -6.5302872   | 1.63E-10 | 12.75509693 |
| TXK           | -0.202668426 | 0.556984136 | -6.5257666   | 1.67E-10 | 12.72792295 |
| ATP8B1        | 0.481166946  | 3.420771006 | 6.525482452  | 1.67E-10 | 12.72621542 |
| MB21D2        | -0.368684252 | 1.492883827 | -6.523890949 | 1.69E-10 | 12.71665278 |
| RP11-294C11.4 | -0.399784914 | 0.480981423 | -6.523852664 | 1.69E-10 | 12.71642277 |
| RP11-295G20.2 | 0.651910329  | 2.627511724 | 6.523249833  | 1.70E-10 | 12.71280116 |
| HLA-F-AS1     | -0.235523414 | 0.671219616 | -6.522965094 | 1.70E-10 | 12.71109064 |
| MAPK11        | -0.404740461 | 2.053671569 | -6.522825829 | 1.70E-10 | 12.71025405 |
| RPP21         | 0.280540802  | 2.491273352 | 6.522778852  | 1.70E-10 | 12.70997185 |
| ZFP36L1       | -0.474755222 | 6.437567747 | -6.522266772 | 1.71E-10 | 12.70689585 |
| CCHCR1        | 0.354518223  | 2.760302864 | 6.521970652  | 1.71E-10 | 12.70511718 |
| SKAP1         | -0.551869577 | 2.144748326 | -6.517622172 | 1.76E-10 | 12.67900559 |
| SNHG17        | 0.376680502  | 2.517238646 | 6.517265041  | 1.76E-10 | 12.67686175 |
| MIR6774       | -0.271480151 | 0.36832561  | -6.515217013 | 1.78E-10 | 12.66456947 |
| IGKV2OR22-3   | -0.497405581 | 0.765164578 | -6.514656201 | 1.79E-10 | 12.66120404 |
| NOP56         | 0.329406101  | 4.178371619 | 6.51445733   | 1.79E-10 | 12.66001067 |
| AAMP          | 0.203827132  | 5.287157896 | 6.5136811    | 1.80E-10 | 12.65535304 |
| GTF3C2        | 0.219179035  | 3.722751845 | 6.513251111  | 1.80E-10 | 12.65277317 |

|                  |              |             |              |          |             |
|------------------|--------------|-------------|--------------|----------|-------------|
| DUSP3            | -0.256998745 | 4.278498568 | -6.511266276 | 1.83E-10 | 12.64086631 |
| RCAN1            | -0.366569212 | 2.531244475 | -6.509273558 | 1.85E-10 | 12.62891523 |
| GKAP1            | 0.244446603  | 1.235248587 | 6.508165069  | 1.86E-10 | 12.62226854 |
| PIR              | 0.620744762  | 2.801054054 | 6.506402212  | 1.88E-10 | 12.61170012 |
| TACC2            | 0.582650236  | 2.637883704 | 6.505830031  | 1.89E-10 | 12.60827038 |
| MCUR1            | 0.244702132  | 3.083085479 | 6.505505436  | 1.89E-10 | 12.60632482 |
| MLKL             | -0.330610408 | 2.144269724 | -6.503594864 | 1.92E-10 | 12.59487489 |
| ARMCX1           | -0.408534415 | 2.6168085   | -6.502615231 | 1.93E-10 | 12.58900511 |
| FBLN5            | -0.555757716 | 3.120536407 | -6.501221023 | 1.94E-10 | 12.58065256 |
| TAPBP            | -0.355437707 | 6.138054357 | -6.49860821  | 1.97E-10 | 12.56500355 |
| AIFM2            | 0.372194872  | 2.795787953 | 6.495035782  | 2.02E-10 | 12.54361566 |
| TRAJ38           | -0.203595114 | 0.187135319 | -6.494919543 | 2.02E-10 | 12.54291991 |
| MTPAP            | 0.21421082   | 2.002316574 | 6.492852023  | 2.05E-10 | 12.53054652 |
| NMI              | -0.338036159 | 3.238990004 | -6.492257556 | 2.05E-10 | 12.52698946 |
| RP11-524D16__A.3 | -0.50800739  | 1.732451735 | -6.488487305 | 2.10E-10 | 12.50443611 |
| OLFML3           | -0.65830545  | 3.968219767 | -6.487025874 | 2.12E-10 | 12.49569692 |
| 2-Mar            | -0.265938876 | 4.006574563 | -6.486074306 | 2.13E-10 | 12.49000754 |
| HMBS             | 0.318219916  | 2.958604358 | 6.483216225  | 2.17E-10 | 12.47292345 |
| MAOB             | -0.59220698  | 2.585916165 | -6.481242071 | 2.20E-10 | 12.46112672 |
| AHR              | -0.540685781 | 4.856997019 | -6.48097805  | 2.20E-10 | 12.45954926 |
| LTBP4            | -0.513494059 | 3.519665479 | -6.479863464 | 2.21E-10 | 12.45289052 |
| SYTL2            | -0.462012118 | 2.169726867 | -6.479536373 | 2.22E-10 | 12.45093661 |
| RP11-493L12.5    | -0.33282579  | 0.750459539 | -6.479099687 | 2.22E-10 | 12.44832814 |
| CDK2AP2          | 0.460802858  | 5.635411723 | 6.479061354  | 2.23E-10 | 12.44809917 |
| IRF2BP1          | 0.308370746  | 3.502919932 | 6.478683125  | 2.23E-10 | 12.44584002 |
| CBR1             | 0.758831986  | 5.200115021 | 6.477141874  | 2.25E-10 | 12.43663531 |
| TMEM176B         | -0.630388743 | 5.75399191  | -6.476311137 | 2.26E-10 | 12.43167472 |
| AC246787.1       | -0.646986737 | 1.199388143 | -6.475372957 | 2.28E-10 | 12.4260732  |
| TLE4             | -0.320407249 | 1.599499857 | -6.474362293 | 2.29E-10 | 12.42003967 |
| APITD1           | 0.271558286  | 1.718138133 | 6.473297851  | 2.31E-10 | 12.41368596 |
| C19orf48         | 0.414052705  | 3.783638649 | 6.46873561   | 2.37E-10 | 12.38646367 |
| IGKV1D-12        | -0.718664782 | 1.373359031 | -6.468137368 | 2.38E-10 | 12.38289525 |
| OASL             | -0.54778826  | 2.033704692 | -6.466351915 | 2.40E-10 | 12.37224693 |

|               |              |             |              |          |             |
|---------------|--------------|-------------|--------------|----------|-------------|
| IGLV2-34      | -0.604176328 | 1.286321687 | -6.464907396 | 2.43E-10 | 12.36363374 |
| OSBPL11       | -0.235666267 | 2.771115059 | -6.459199687 | 2.51E-10 | 12.32961644 |
| SLC9A6        | -0.255056119 | 2.522719719 | -6.455937016 | 2.56E-10 | 12.31018269 |
| FLAD1         | 0.321676132  | 3.847236399 | 6.455869177  | 2.56E-10 | 12.3097787  |
| FAM46C        | -0.545402999 | 3.35050453  | -6.455783461 | 2.56E-10 | 12.30926826 |
| CTD-2547L24.4 | -0.253102613 | 0.602658856 | -6.454775331 | 2.58E-10 | 12.30326524 |
| SHARPIN       | 0.33912909   | 4.863022616 | 6.454643427  | 2.58E-10 | 12.30247986 |
| GYG2          | 0.480467413  | 2.025991222 | 6.453598021  | 2.60E-10 | 12.29625582 |
| TNFSF14       | -0.321107186 | 0.845739235 | -6.452518699 | 2.62E-10 | 12.28983075 |
| 11-Sep        | -0.392148052 | 3.500767198 | -6.450868726 | 2.64E-10 | 12.28001041 |
| RUVBL1        | 0.303451346  | 3.188512681 | 6.450111879  | 2.66E-10 | 12.27550651 |
| SEC14L1       | -0.348468928 | 3.096485173 | -6.448908594 | 2.67E-10 | 12.26834683 |
| RP11-320M2.1  | 0.273663227  | 0.770863177 | 6.447999839  | 2.69E-10 | 12.26294039 |
| MKNK1         | -0.218823768 | 2.41839918  | -6.447314898 | 2.70E-10 | 12.2588659  |
| ELN           | -0.758486347 | 3.614728313 | -6.447223295 | 2.70E-10 | 12.25832101 |
| IGHV1OR16-3   | -0.482078456 | 0.725789639 | -6.44677079  | 2.71E-10 | 12.25562944 |
| IGHV3-25      | -0.392608337 | 0.665497741 | -6.444439892 | 2.75E-10 | 12.24176743 |
| ABCB1         | -0.25379819  | 0.647954627 | -6.442634127 | 2.78E-10 | 12.23103135 |
| C10orf2       | 0.295761564  | 2.347115404 | 6.441741031  | 2.79E-10 | 12.22572242 |
| TMEM52        | 0.404784876  | 1.261529891 | 6.441345129  | 2.80E-10 | 12.22336922 |
| SLC25A30      | -0.218244601 | 1.699108889 | -6.440985938 | 2.81E-10 | 12.22123433 |
| PHF11         | -0.234959511 | 2.751229602 | -6.440757236 | 2.81E-10 | 12.21987507 |
| PVALB         | -0.270255448 | 0.42707275  | -6.440372039 | 2.82E-10 | 12.21758579 |
| COL13A1       | -0.318151171 | 0.984335242 | -6.439204975 | 2.84E-10 | 12.21065048 |
| AP000688.14   | 0.205063731  | 0.316771259 | 6.43833953   | 2.85E-10 | 12.20550824 |
| LRRC17        | -0.406336667 | 1.303879597 | -6.432847424 | 2.95E-10 | 12.17288922 |
| SERPINE1      | -0.777934203 | 4.538856743 | -6.431097802 | 2.98E-10 | 12.16250271 |
| IGLJ1         | -0.426610126 | 0.764530016 | -6.430072142 | 3.00E-10 | 12.15641506 |
| PATZ1         | 0.289831634  | 3.374765648 | 6.429655595  | 3.01E-10 | 12.15394294 |
| WDR34         | 0.377315705  | 4.948284029 | 6.429572601  | 3.01E-10 | 12.15345041 |
| ESRRA         | 0.311316063  | 4.09149198  | 6.423919046  | 3.11E-10 | 12.11991155 |
| CNN3          | -0.425377007 | 5.787380682 | -6.422256279 | 3.14E-10 | 12.1100522  |
| SWI5          | 0.273424692  | 3.505196351 | 6.422068123  | 3.15E-10 | 12.10893666 |



|               |              |             |              |          |             |
|---------------|--------------|-------------|--------------|----------|-------------|
| UBE2V2        | 0.27646153   | 3.188601752 | 6.420714877  | 3.17E-10 | 12.1009144  |
| AC016831.7    | 0.350686902  | 0.563180497 | 6.419933679  | 3.19E-10 | 12.09628398 |
| HRAS          | 0.316990654  | 3.836698959 | 6.417517954  | 3.24E-10 | 12.08196819 |
| ARHGAP20      | -0.397067653 | 1.01400017  | -6.416886589 | 3.25E-10 | 12.07822743 |
| IGFBP4        | -0.465438688 | 7.568184579 | -6.414880389 | 3.29E-10 | 12.06634298 |
| MTM1          | -0.264439975 | 2.313728196 | -6.414590898 | 3.29E-10 | 12.06462833 |
| MAL           | -0.583587683 | 1.936713576 | -6.413259321 | 3.32E-10 | 12.0567423  |
| COPZ2         | -0.44477706  | 2.546548382 | -6.407426303 | 3.44E-10 | 12.02221358 |
| SUPV3L1       | 0.212365861  | 2.763030565 | 6.404220953  | 3.51E-10 | 12.00325075 |
| OLFM1         | -0.476382786 | 1.26377703  | -6.402240741 | 3.55E-10 | 11.99153984 |
| PNPT1         | 0.297608401  | 3.104325078 | 6.401598172  | 3.56E-10 | 11.98774037 |
| RNA5SP39      | -0.205739149 | 0.345563297 | -6.400177029 | 3.59E-10 | 11.97933839 |
| SLC6A12       | -0.242376035 | 0.628993809 | -6.396069219 | 3.69E-10 | 11.95506136 |
| DIO2          | -0.498767493 | 1.249583463 | -6.393513169 | 3.74E-10 | 11.93996186 |
| NMB           | 0.54223832   | 3.084678654 | 6.393470613  | 3.74E-10 | 11.93971051 |
| IGHV3OR16-15  | -0.301429237 | 0.518522639 | -6.390796401 | 3.80E-10 | 11.92391854 |
| TSC22D3       | -0.586188162 | 5.273088799 | -6.390264265 | 3.82E-10 | 11.92077679 |
| CR2           | -0.623889645 | 1.353646425 | -6.389809572 | 3.83E-10 | 11.91809245 |
| IGKV2D-40     | -1.021772195 | 2.6006521   | -6.389774923 | 3.83E-10 | 11.9178879  |
| LHX4-AS1      | 0.203930466  | 2.620281336 | 6.388751911  | 3.85E-10 | 11.91184903 |
| PICK1         | 0.303666705  | 2.869545145 | 6.385722861  | 3.92E-10 | 11.89397326 |
| CFD           | -0.701436876 | 3.868102678 | -6.38417875  | 3.96E-10 | 11.88486355 |
| 8-Sep         | -0.254871139 | 2.890419719 | -6.383408084 | 3.98E-10 | 11.88031758 |
| FXR2          | 0.245465613  | 3.398524198 | 6.38288596   | 3.99E-10 | 11.87723797 |
| NPR2          | -0.279274398 | 1.640697834 | -6.380569424 | 4.05E-10 | 11.86357706 |
| RP11-798K23.5 | -0.406581674 | 1.624014856 | -6.376507589 | 4.15E-10 | 11.83963406 |
| PANK1         | 0.245456682  | 1.021089802 | 6.376450509  | 4.15E-10 | 11.83929769 |
| ROS1          | -0.820590752 | 2.807974774 | -6.376164295 | 4.16E-10 | 11.83761106 |
| DPM2          | 0.293114351  | 4.36486117  | 6.375225771  | 4.18E-10 | 11.83208091 |
| AC013264.2    | -0.566461727 | 0.984660956 | -6.372763235 | 4.24E-10 | 11.81757395 |
| ITPR2         | -0.383136197 | 2.04972753  | -6.372227567 | 4.26E-10 | 11.81441892 |
| MARVELD1      | -0.425566305 | 4.130933433 | -6.369724448 | 4.32E-10 | 11.79967881 |
| ADAMTS16      | -0.384108253 | 0.924674432 | -6.369149077 | 4.34E-10 | 11.79629132 |

|               |              |             |              |          |             |
|---------------|--------------|-------------|--------------|----------|-------------|
| TRAJ2         | -0.273712013 | 0.374189583 | -6.368349373 | 4.36E-10 | 11.79158351 |
| USP21         | 0.256831061  | 3.372282846 | 6.367926448  | 4.37E-10 | 11.78909397 |
| RP11-480I12.5 | 0.451336075  | 1.477957066 | 6.366184962  | 4.41E-10 | 11.77884424 |
| FAM212A       | -0.290916623 | 1.326011674 | -6.365747293 | 4.43E-10 | 11.77626866 |
| ANXA1         | -0.781383716 | 5.797547682 | -6.365537869 | 4.43E-10 | 11.7750363  |
| SRPX2         | -0.707750265 | 3.250988568 | -6.363265647 | 4.49E-10 | 11.7616676  |
| MRPL30        | 0.233597504  | 3.503188603 | 6.362472896  | 4.51E-10 | 11.75700436 |
| DOK1          | -0.288424943 | 2.815126717 | -6.362352704 | 4.52E-10 | 11.7562974  |
| RP11-77A13.1  | -0.396944694 | 0.39333358  | -6.361262436 | 4.55E-10 | 11.74988498 |
| PUSL1         | 0.319905438  | 2.79429066  | 6.359977034  | 4.58E-10 | 11.74232609 |
| MACROD1       | 0.423637656  | 3.067738642 | 6.356311828  | 4.68E-10 | 11.7207797  |
| SECTM1        | -0.574466063 | 3.536114028 | -6.352673994 | 4.79E-10 | 11.69940466 |
| IGHV3-65      | -0.340022276 | 0.470478196 | -6.352629189 | 4.79E-10 | 11.69914146 |
| BOP1          | 0.44538093   | 4.019201829 | 6.351497016  | 4.82E-10 | 11.69249125 |
| NDUFS2        | 0.246255088  | 4.916337304 | 6.351451585  | 4.82E-10 | 11.69222441 |
| CD59          | -0.439380276 | 6.198073547 | -6.349949931 | 4.87E-10 | 11.68340553 |
| C14orf132     | -0.404767768 | 1.415417278 | -6.349343904 | 4.88E-10 | 11.67984696 |
| MRPL2         | 0.272854666  | 3.638168537 | 6.349112947  | 4.89E-10 | 11.67849087 |
| IGKV2-24      | -1.05778449  | 4.351313937 | -6.347019797 | 4.95E-10 | 11.66620259 |
| CBX8          | 0.25986942   | 2.029405611 | 6.346252106  | 4.98E-10 | 11.66169656 |
| STAT5B        | -0.236875854 | 3.394847992 | -6.345491996 | 5.00E-10 | 11.65723548 |
| EBPL          | 0.367407837  | 4.237987667 | 6.344469009  | 5.03E-10 | 11.6512323  |
| ITIH5         | -0.404425802 | 1.000249928 | -6.342937705 | 5.08E-10 | 11.6422477  |
| MT2A          | -0.719031744 | 6.113899113 | -6.341879677 | 5.11E-10 | 11.63604103 |
| ST6GALNAC6    | -0.321857801 | 3.502458447 | -6.340979795 | 5.14E-10 | 11.63076278 |
| CLIP2         | -0.384458904 | 1.906501161 | -6.337309151 | 5.25E-10 | 11.60923922 |
| ZNF696        | 0.25805311   | 1.60903558  | 6.334647328  | 5.34E-10 | 11.59363771 |
| AC074117.10   | 0.272813847  | 1.416623148 | 6.331518056  | 5.44E-10 | 11.57530352 |
| MYCBP2        | -0.305895858 | 2.176185757 | -6.330519977 | 5.47E-10 | 11.56945746 |
| RP11-20G13.2  | -0.246898046 | 0.339188251 | -6.326533386 | 5.60E-10 | 11.54611458 |
| ARHGEF39      | 0.26908008   | 1.048578286 | 6.323766378  | 5.69E-10 | 11.52992014 |
| VOPP1         | -0.36514191  | 3.459337876 | -6.32315586  | 5.72E-10 | 11.52634777 |
| WI2-1896O14.1 | -0.382981127 | 1.460938484 | -6.321476824 | 5.77E-10 | 11.51652464 |

|            |              |             |              |          |             |
|------------|--------------|-------------|--------------|----------|-------------|
| TTYH2      | -0.311660674 | 1.26778444  | -6.320792069 | 5.80E-10 | 11.51251914 |
| VCL        | -0.351953352 | 3.932212476 | -6.319239754 | 5.85E-10 | 11.50344019 |
| RHOA       | -0.205880655 | 7.714338151 | -6.318026785 | 5.89E-10 | 11.49634728 |
| IGHV1-3    | -0.933418395 | 2.093255948 | -6.317478113 | 5.91E-10 | 11.49313927 |
| CTSD       | -0.447683503 | 8.817517966 | -6.316913096 | 5.93E-10 | 11.48983594 |
| BACE1      | -0.312783506 | 2.514769404 | -6.313037215 | 6.07E-10 | 11.46718265 |
| RAP1GAP2   | 0.437588457  | 2.255096996 | 6.31049216   | 6.17E-10 | 11.45231406 |
| EIF2AK1    | 0.257419756  | 5.511425112 | 6.309871371  | 6.19E-10 | 11.44868809 |
| BFSP1      | 0.249116473  | 0.970617882 | 6.307717271  | 6.27E-10 | 11.43610855 |
| NMT2       | -0.232079913 | 1.660713121 | -6.3054489   | 6.35E-10 | 11.42286565 |
| RASA2      | -0.263213927 | 2.331897659 | -6.305348496 | 6.36E-10 | 11.42227958 |
| MRPS16     | 0.240080024  | 4.830074809 | 6.304031422  | 6.41E-10 | 11.41459238 |
| SLC40A1    | -0.617198107 | 5.181563343 | -6.303205842 | 6.44E-10 | 11.40977451 |
| MRPL24     | 0.342229988  | 5.213342239 | 6.299188504  | 6.60E-10 | 11.38633807 |
| ROBO1      | -0.410679921 | 1.959991456 | -6.298521181 | 6.62E-10 | 11.38244626 |
| DMXL1      | -0.21479747  | 1.66135468  | -6.297734592 | 6.65E-10 | 11.37785935 |
| DDT        | 0.329002338  | 3.717492102 | 6.297575786  | 6.66E-10 | 11.37693334 |
| STAU2      | 0.308130311  | 2.840062264 | 6.296777836  | 6.69E-10 | 11.37228077 |
| ZNF469     | -0.237124835 | 0.705301867 | -6.296028436 | 6.72E-10 | 11.36791174 |
| RIN2       | -0.305336445 | 3.78605067  | -6.295601185 | 6.74E-10 | 11.36542105 |
| PTGER2     | -0.479732655 | 1.602923505 | -6.294335372 | 6.79E-10 | 11.35804274 |
| AC244250.4 | -0.727778969 | 1.217021494 | -6.293336713 | 6.83E-10 | 11.35222254 |
| IGHV7-56   | -0.467420999 | 0.850741598 | -6.291811674 | 6.89E-10 | 11.3433361  |
| MIR4537    | -0.556150281 | 0.973378391 | -6.290918745 | 6.93E-10 | 11.33813384 |
| CCDC24     | 0.353630168  | 2.410699156 | 6.290211214  | 6.96E-10 | 11.33401216 |
| CNOT11     | 0.257236866  | 4.872033678 | 6.290108047  | 6.96E-10 | 11.3334112  |
| FASN       | 0.61915112   | 5.016296641 | 6.288784925  | 7.02E-10 | 11.32570461 |
| PDHA1      | 0.242927039  | 3.765307077 | 6.288233375  | 7.04E-10 | 11.32249248 |
| ETV1       | -0.502634869 | 2.128038448 | -6.287329258 | 7.08E-10 | 11.31722759 |
| JPH2       | -0.20665758  | 0.495654196 | -6.286739317 | 7.11E-10 | 11.31379257 |
| HES6       | 0.751101267  | 2.894688067 | 6.286486724  | 7.12E-10 | 11.31232189 |
| RASSF8     | -0.429047429 | 1.861945825 | -6.282444202 | 7.29E-10 | 11.2887919  |
| IL13RA2    | -0.483343009 | 0.728512885 | -6.281942172 | 7.31E-10 | 11.28587068 |

|               |              |             |              |          |             |
|---------------|--------------|-------------|--------------|----------|-------------|
| METTL7A       | -0.533763082 | 4.012325863 | -6.281215903 | 7.34E-10 | 11.281645   |
| RNF208        | 0.430534805  | 2.95328371  | 6.280721863  | 7.37E-10 | 11.27877074 |
| DEGS1         | -0.261382465 | 4.926829442 | -6.275263206 | 7.61E-10 | 11.24702586 |
| GLRX          | -0.410198526 | 2.685610647 | -6.274317504 | 7.65E-10 | 11.24152852 |
| PI16          | -0.31067279  | 0.436440585 | -6.273903166 | 7.67E-10 | 11.2391202  |
| IGKV7-3       | -0.425524897 | 0.776405826 | -6.27144455  | 7.78E-10 | 11.22483242 |
| IFI44L        | -0.630040467 | 2.012828535 | -6.269724143 | 7.86E-10 | 11.21483745 |
| C9orf72       | -0.275157166 | 1.757576119 | -6.266663868 | 8.01E-10 | 11.19706408 |
| TBCE          | 0.274905423  | 3.710548983 | 6.265285405  | 8.07E-10 | 11.1890607  |
| FRAT2         | 0.336875466  | 3.010340047 | 6.265129905  | 8.08E-10 | 11.18815796 |
| SNRPA         | 0.229876193  | 4.63220995  | 6.264832985  | 8.10E-10 | 11.18643428 |
| ITGA11        | -0.604497459 | 1.96909731  | -6.2643807   | 8.12E-10 | 11.18380879 |
| PCAT19        | -0.307754962 | 1.077221424 | -6.264014833 | 8.14E-10 | 11.18168507 |
| TRIM28        | 0.290717669  | 6.078085572 | 6.263986009  | 8.14E-10 | 11.18151777 |
| DHCR7         | 0.403330518  | 4.153435061 | 6.263515346  | 8.16E-10 | 11.17878592 |
| VPS52         | 0.236834427  | 3.760891542 | 6.259805524  | 8.34E-10 | 11.15725929 |
| SF3B6         | 0.253870988  | 5.769140895 | 6.259008789  | 8.38E-10 | 11.15263758 |
| YDJC          | 0.364686742  | 3.729157347 | 6.25893971   | 8.38E-10 | 11.15223689 |
| MEIS1         | -0.255478469 | 1.145739826 | -6.256235862 | 8.52E-10 | 11.13655624 |
| GPRASP1       | -0.267581421 | 0.925131356 | -6.255225367 | 8.57E-10 | 11.13069748 |
| IGHD4-23      | -0.428047305 | 0.47187415  | -6.255165821 | 8.57E-10 | 11.13035226 |
| FABP3         | -0.794896648 | 3.414630159 | -6.253602123 | 8.65E-10 | 11.12128774 |
| SAA2          | -0.705680231 | 1.327802294 | -6.25297921  | 8.69E-10 | 11.11767735 |
| RP11-686D22.8 | -0.248504319 | 1.109763284 | -6.252808486 | 8.70E-10 | 11.11668789 |
| TM4SF18       | -0.436221541 | 1.440821223 | -6.252047795 | 8.74E-10 | 11.11227945 |
| EFHD2         | -0.413018183 | 5.437911305 | -6.249117451 | 8.89E-10 | 11.09530152 |
| ZNF620        | 0.200986592  | 1.053768782 | 6.248793809  | 8.91E-10 | 11.0934268  |
| ROBO4         | -0.37744054  | 1.862660055 | -6.246836423 | 9.01E-10 | 11.08209031 |
| THAP4         | 0.222664391  | 4.085001151 | 6.245784065  | 9.07E-10 | 11.07599668 |
| ADCK5         | 0.393812535  | 2.535183811 | 6.245653351  | 9.07E-10 | 11.07523984 |
| FOXN3         | -0.317621016 | 2.577012978 | -6.241028758 | 9.33E-10 | 11.04847221 |
| MAPKAPK3      | -0.335806851 | 4.107241393 | -6.238106835 | 9.49E-10 | 11.03156854 |
| LZTS3         | 0.473346625  | 3.34763236  | 6.237943709  | 9.50E-10 | 11.03062504 |

|              |              |             |              |          |             |
|--------------|--------------|-------------|--------------|----------|-------------|
| C11orf49     | 0.273256354  | 2.709100326 | 6.232488656  | 9.81E-10 | 10.99908572 |
| ADAMTS1      | -0.505591438 | 2.463199555 | -6.23137309  | 9.87E-10 | 10.99263879 |
| KLF10        | -0.336478535 | 4.204318948 | -6.228339031 | 1.01E-09 | 10.97510974 |
| AC108463.2   | -0.236115347 | 0.90269411  | -6.225894246 | 1.02E-09 | 10.9609905  |
| GCAT         | 0.426702     | 2.878210993 | 6.221245723  | 1.05E-09 | 10.93415718 |
| FOXO1        | -0.372165674 | 2.453178091 | -6.220495919 | 1.05E-09 | 10.92983059 |
| ZSCAN16      | 0.296357379  | 2.694477844 | 6.22019193   | 1.05E-09 | 10.92807662 |
| DHTKD1       | 0.32306006   | 3.33362997  | 6.218472855  | 1.07E-09 | 10.91815914 |
| ADCY4        | -0.246763244 | 1.009222132 | -6.218342221 | 1.07E-09 | 10.9174056  |
| PAXIP1       | 0.213137376  | 1.636878451 | 6.21771153   | 1.07E-09 | 10.91376774 |
| INMT         | -0.706382526 | 2.563963061 | -6.216764819 | 1.08E-09 | 10.90830767 |
| PLA2R1       | -0.226952723 | 0.917222043 | -6.216753397 | 1.08E-09 | 10.9082418  |
| CARKD        | 0.327125356  | 4.028984768 | 6.213365624  | 1.10E-09 | 10.88870896 |
| YPEL2        | -0.238262216 | 2.050960083 | -6.211537415 | 1.11E-09 | 10.87817186 |
| HSF1         | 0.288083858  | 4.319585831 | 6.208736741  | 1.13E-09 | 10.86203499 |
| C12orf4      | -0.222492938 | 2.221908025 | -6.20797472  | 1.13E-09 | 10.85764547 |
| PCCB         | 0.280105031  | 2.719924351 | 6.207675474  | 1.14E-09 | 10.85592183 |
| PAFAH1B3     | 0.452918925  | 4.62569648  | 6.205854496  | 1.15E-09 | 10.84543463 |
| FXYD4        | 0.781179492  | 1.042183758 | 6.203845262  | 1.16E-09 | 10.8338663  |
| PA2G4        | 0.259938571  | 5.110610667 | 6.203467312  | 1.16E-09 | 10.83169058 |
| GPR1         | -0.221478432 | 0.313426561 | -6.202214405 | 1.17E-09 | 10.82447886 |
| RP11-517I3.2 | -0.212461943 | 0.834670682 | -6.20132518  | 1.18E-09 | 10.81936125 |
| SYT7         | 0.74765119   | 3.11424363  | 6.201290469  | 1.18E-09 | 10.81916149 |
| FAM13B       | -0.26464048  | 2.147133025 | -6.198608353 | 1.20E-09 | 10.80372943 |
| RP11-251M1.1 | -0.229937296 | 0.529314967 | -6.196529363 | 1.21E-09 | 10.7917715  |
| PPFIBP1      | -0.325164473 | 2.200078459 | -6.196141976 | 1.22E-09 | 10.78954371 |
| SMG5         | 0.297506323  | 4.82911262  | 6.192856173  | 1.24E-09 | 10.77065244 |
| MID2         | -0.298634843 | 1.707326178 | -6.190733036 | 1.26E-09 | 10.75845033 |
| FARSB        | 0.252491797  | 3.875532674 | 6.189392379  | 1.27E-09 | 10.75074713 |
| PEX13        | 0.209151792  | 3.266184666 | 6.188929255  | 1.27E-09 | 10.74808644 |
| RABL6        | 0.267052866  | 3.431191695 | 6.18822961   | 1.27E-09 | 10.74406721 |
| ZNF154       | -0.275362099 | 0.899702062 | -6.185506722 | 1.29E-09 | 10.72842887 |
| FAM20C       | -0.446616889 | 3.376132286 | -6.185390423 | 1.30E-09 | 10.72776106 |

|          |               |             |              |          |             |
|----------|---------------|-------------|--------------|----------|-------------|
| PTGES2   | 0.276041077   | 3.961660869 | 6.184551684  | 1.30E-09 | 10.72294521 |
| HSBP1L1  | 0.36654876    | 3.296880069 | 6.18166723   | 1.32E-09 | 10.70638756 |
| ABHD6    | -0.238790458  | 1.62903097  | -6.180875095 | 1.33E-09 | 10.70184162 |
| DDX60L   | -0.336328854  | 1.76210836  | -6.180289317 | 1.33E-09 | 10.69848026 |
| IGHV3-6  | -0.335625176  | 0.50761793  | -6.18009696  | 1.34E-09 | 10.69737652 |
| LARP1B   | 0.200863038   | 1.853615207 | 6.179349872  | 1.34E-09 | 10.69309002 |
| WDR12    | 0.231650659   | 2.070613227 | 6.178835639  | 1.35E-09 | 10.6901398  |
| IGFBP6   | -0.7113972173 | 2.911893494 | -6.174915065 | 1.38E-09 | 10.66765396 |
| RBMS3    | -0.3258318    | 1.266041479 | -6.174179369 | 1.38E-09 | 10.66343585 |
| ERP29    | 0.30678531    | 6.115033694 | 6.172553768  | 1.40E-09 | 10.65411701 |
| WDFY1    | -0.256937025  | 3.581736389 | -6.17204111  | 1.40E-09 | 10.65117861 |
| 3-Mar    | -0.253485583  | 0.999331785 | -6.170699601 | 1.41E-09 | 10.64349047 |
| SSB      | 0.228734454   | 4.330722501 | 6.169880674  | 1.42E-09 | 10.63879793 |
| PDLIM4   | -0.622529374  | 2.536994552 | -6.16974325  | 1.42E-09 | 10.63801053 |
| PYGO2    | 0.250891676   | 4.557688882 | 6.169641071  | 1.42E-09 | 10.63742509 |
| TMED4    | 0.248369825   | 5.384580951 | 6.169108097  | 1.43E-09 | 10.63437148 |
| PSMD4    | 0.275446744   | 5.813843865 | 6.168958866  | 1.43E-09 | 10.63351652 |
| DCBLD1   | -0.364567454  | 2.388096007 | -6.166656224 | 1.45E-09 | 10.6203267  |
| HS3ST3A1 | -0.261877126  | 0.527893027 | -6.162910021 | 1.48E-09 | 10.59887699 |
| BPHL     | 0.291881294   | 2.152781191 | 6.160171934  | 1.50E-09 | 10.58320655 |
| ACKR4    | -0.248388412  | 0.490337934 | -6.16006411  | 1.50E-09 | 10.58258958 |
| HLA-DPB2 | -0.453073016  | 1.202766222 | -6.159513394 | 1.51E-09 | 10.57943853 |
| LRP5     | 0.395471021   | 4.557962968 | 6.159315189  | 1.51E-09 | 10.57830451 |
| POLK     | -0.215210711  | 1.755637148 | -6.156181508 | 1.54E-09 | 10.5603795  |
| FABP4    | -0.667394237  | 1.497035843 | -6.155837036 | 1.54E-09 | 10.55840956 |
| TMEM55A  | -0.297710145  | 1.737035432 | -6.155777588 | 1.54E-09 | 10.5580696  |
| PLAUR    | -0.542334155  | 4.135161107 | -6.154057635 | 1.56E-09 | 10.54823516 |
| CRLF3    | -0.228513763  | 2.640561375 | -6.152943434 | 1.57E-09 | 10.54186557 |
| FAM102B  | -0.314682982  | 1.671692811 | -6.152433791 | 1.57E-09 | 10.53895241 |
| RNF144B  | -0.411314091  | 2.764429271 | -6.146702865 | 1.63E-09 | 10.50620824 |
| BEND6    | -0.225836291  | 0.517264691 | -6.143975323 | 1.65E-09 | 10.49063337 |
| MT1M     | -0.599877548  | 1.620117338 | -6.143766595 | 1.65E-09 | 10.48944173 |
| GPX8     | -0.474047381  | 2.915788007 | -6.141994631 | 1.67E-09 | 10.4793269  |

|                  |              |             |              |          |             |
|------------------|--------------|-------------|--------------|----------|-------------|
| SLC28A3          | -0.40749762  | 0.936394563 | -6.140422633 | 1.69E-09 | 10.47035563 |
| RBMS1            | -0.243131947 | 3.000014522 | -6.138086227 | 1.71E-09 | 10.45702558 |
| DPY30            | 0.271936816  | 4.169839167 | 6.137792835  | 1.71E-09 | 10.45535197 |
| ECE2             | 0.315816894  | 1.51470069  | 6.136308075  | 1.73E-09 | 10.44688349 |
| RSU1             | -0.226278275 | 4.237193164 | -6.135064318 | 1.74E-09 | 10.43979094 |
| MXRA7            | -0.418624114 | 2.978692317 | -6.134507299 | 1.75E-09 | 10.43661492 |
| C10orf35         | 0.337770802  | 3.311878088 | 6.133342463  | 1.76E-09 | 10.42997407 |
| DOK5             | -0.415507641 | 0.989376034 | -6.130286489 | 1.79E-09 | 10.41255676 |
| MIS18A           | 0.334929693  | 3.041650011 | 6.129781147  | 1.79E-09 | 10.40967732 |
| TMEM141          | 0.422525885  | 5.07964083  | 6.129649351  | 1.80E-09 | 10.40892638 |
| XXyac-YX65C7_A.2 | -0.216195764 | 0.643143334 | -6.128843245 | 1.80E-09 | 10.40433369 |
| TOP1MT           | 0.306787339  | 2.565331177 | 6.128165728  | 1.81E-09 | 10.40047402 |
| TSPAN9           | -0.357212483 | 3.207546921 | -6.12735471  | 1.82E-09 | 10.39585431 |
| ZNF692           | 0.435022762  | 3.01743678  | 6.127178784  | 1.82E-09 | 10.39485227 |
| NOL3             | 0.389819094  | 3.780264925 | 6.126462492  | 1.83E-09 | 10.39077267 |
| RP11-9E17.1      | 0.314755025  | 1.10536765  | 6.123627464  | 1.86E-09 | 10.37462996 |
| CBFA2T3          | -0.322556844 | 0.993352675 | -6.122981259 | 1.87E-09 | 10.37095135 |
| MFAP5            | -0.558540227 | 1.054965316 | -6.121881406 | 1.88E-09 | 10.36469106 |
| EOGT             | -0.249160461 | 2.400212621 | -6.120513788 | 1.89E-09 | 10.35690802 |
| SYNE1            | -0.357727167 | 1.510512032 | -6.116586342 | 1.94E-09 | 10.33456544 |
| FHAD1            | -0.239014318 | 0.501964734 | -6.114292805 | 1.96E-09 | 10.32152359 |
| RP11-566K19.6    | 0.337644475  | 0.539694745 | 6.113590206  | 1.97E-09 | 10.31752921 |
| TOR1AIP1         | -0.211511695 | 3.19644134  | -6.111974028 | 1.99E-09 | 10.3083425  |
| TMEM71           | -0.331728051 | 1.0222563   | -6.111317065 | 2.00E-09 | 10.30460877 |
| HPN-AS1          | 0.21593416   | 0.501099241 | 6.111214875  | 2.00E-09 | 10.30402803 |
| COPG1            | 0.241223286  | 6.029841608 | 6.108649555  | 2.03E-09 | 10.28945202 |
| MOB1A            | -0.20982575  | 4.75957986  | -6.106057597 | 2.06E-09 | 10.27473    |
| VAPA             | 0.286021639  | 4.165880605 | 6.105984398  | 2.06E-09 | 10.27431433 |
| E2F6             | 0.212940812  | 2.142833657 | 6.103160113  | 2.10E-09 | 10.258279   |
| DHRS13           | 0.250209121  | 1.507878942 | 6.101694987  | 2.11E-09 | 10.24996303 |
| SLC39A7          | 0.307076481  | 6.384520103 | 6.100867673  | 2.12E-09 | 10.24526801 |
| SEPP1            | -0.588754348 | 3.842830607 | -6.099125066 | 2.15E-09 | 10.23538047 |
| CDK16            | 0.282008392  | 4.164802599 | 6.098642175  | 2.15E-09 | 10.23264097 |

|               |              |             |              |          |             |
|---------------|--------------|-------------|--------------|----------|-------------|
| LATS2         | -0.271911256 | 2.514660446 | -6.097465948 | 2.17E-09 | 10.2259689  |
| SERTAD1       | -0.356592889 | 3.608193581 | -6.097075868 | 2.17E-09 | 10.22375643 |
| BTBD19        | -0.30934036  | 1.285173535 | -6.096866941 | 2.17E-09 | 10.22257149 |
| PTGES3P1      | -0.292292486 | 3.035274932 | -6.095523182 | 2.19E-09 | 10.2149511  |
| TMEM254       | 0.289202388  | 3.443954063 | 6.093863707  | 2.21E-09 | 10.20554228 |
| ACOT13        | 0.283170671  | 3.063937021 | 6.092607913  | 2.23E-09 | 10.19842371 |
| IGHV7-27      | -0.407591677 | 0.738649942 | -6.09028425  | 2.26E-09 | 10.18525516 |
| NUDT8         | 0.395759931  | 2.669661908 | 6.088453693  | 2.28E-09 | 10.17488417 |
| FLT4          | -0.323639669 | 1.618059253 | -6.08760653  | 2.29E-09 | 10.17008548 |
| IGKV1OR2-9    | -0.287427702 | 0.434035595 | -6.087056626 | 2.30E-09 | 10.16697091 |
| AC104667.3    | 0.274327313  | 1.033440757 | 6.084138438  | 2.34E-09 | 10.15044676 |
| GFRA1         | -0.293127331 | 0.511017371 | -6.082358189 | 2.37E-09 | 10.14036951 |
| ACSL4         | -0.448621996 | 3.847546361 | -6.079426033 | 2.41E-09 | 10.12377733 |
| PHACTR2       | -0.312115955 | 2.007188557 | -6.078507078 | 2.42E-09 | 10.11857866 |
| CDC14A        | -0.252355654 | 1.239885717 | -6.077069423 | 2.44E-09 | 10.11044698 |
| IL5RA         | -0.237822248 | 0.339777389 | -6.073370252 | 2.49E-09 | 10.08953132 |
| TRAJ6         | -0.225507201 | 0.279901803 | -6.07335204  | 2.49E-09 | 10.08942837 |
| CTD-2260A17.1 | -0.204631827 | 0.787995063 | -6.070246847 | 2.54E-09 | 10.07187966 |
| RP3-406A7.7   | 0.405309255  | 2.013569822 | 6.070050893  | 2.54E-09 | 10.0707725  |
| TIMM17B       | 0.330210567  | 4.244366818 | 6.068976064  | 2.56E-09 | 10.06470017 |
| IFNAR1        | -0.228768429 | 3.998276018 | -6.068576615 | 2.56E-09 | 10.06244369 |
| SDC2          | -0.481112503 | 3.345408505 | -6.068161821 | 2.57E-09 | 10.06010066 |
| RP11-388C12.8 | 0.288644164  | 0.878455363 | 6.063708693  | 2.64E-09 | 10.03495516 |
| IFIT5         | -0.325952156 | 3.098845462 | -6.063497238 | 2.64E-09 | 10.03376154 |
| RP11-168F9.2  | 0.295873681  | 0.725217256 | 6.061287948  | 2.67E-09 | 10.0212926  |
| IGHD3-22      | -0.587611292 | 1.000046121 | -6.059981785 | 2.69E-09 | 10.01392264 |
| SNRPD1        | 0.302291497  | 3.338537918 | 6.059146521  | 2.71E-09 | 10.00921042 |
| ITPA          | 0.293931377  | 4.526472535 | 6.058856318  | 2.71E-09 | 10.00757334 |
| FGF1          | -0.300397496 | 0.836116064 | -6.05838282  | 2.72E-09 | 10.00490242 |
| KIF21B        | -0.289893317 | 1.160012535 | -6.056398467 | 2.75E-09 | 9.993710973 |
| PFDN2         | 0.328036368  | 6.251766247 | 6.056382923  | 2.75E-09 | 9.993623321 |
| EPT1          | 0.343249051  | 2.853719665 | 6.056311828  | 2.75E-09 | 9.993222411 |
| SUV420H1      | 0.212413334  | 2.969495399 | 6.05592977   | 2.76E-09 | 9.991068052 |



|               |              |             |              |          |             |
|---------------|--------------|-------------|--------------|----------|-------------|
| TGFBR3        | -0.371205666 | 1.319169552 | -6.054716817 | 2.78E-09 | 9.984229197 |
| ELF4          | -0.358249638 | 3.348696014 | -6.054527894 | 2.78E-09 | 9.983164117 |
| RP11-983P16.4 | 0.335229145  | 1.578751937 | 6.053679948  | 2.79E-09 | 9.978384071 |
| C3orf80       | -0.264095004 | 0.864979036 | -6.053553125 | 2.80E-09 | 9.97766919  |
| HEXB          | -0.284598057 | 4.812579138 | -6.052460688 | 2.81E-09 | 9.971511854 |
| AC244157.1    | -0.474163144 | 0.747715792 | -6.052367675 | 2.81E-09 | 9.970987651 |
| RP11-10A14.4  | 0.284324431  | 0.564532263 | 6.05027627   | 2.85E-09 | 9.959202632 |
| PEAR1         | -0.277535865 | 1.106575518 | -6.05022041  | 2.85E-09 | 9.958887909 |
| FZD5          | 0.355100151  | 2.830149613 | 6.049163806  | 2.87E-09 | 9.952935355 |
| IGKV3OR2-5    | -0.305097967 | 0.344961368 | -6.048787192 | 2.87E-09 | 9.950813856 |
| DPYSL3        | -0.579720028 | 4.556356751 | -6.048600878 | 2.88E-09 | 9.949764375 |
| PSMB5         | 0.302844185  | 6.032593911 | 6.046601915  | 2.91E-09 | 9.938506237 |
| AIMP2         | 0.294811509  | 3.689217548 | 6.045464344  | 2.93E-09 | 9.932100887 |
| COX6C         | 0.325814924  | 4.979051303 | 6.044078057  | 2.95E-09 | 9.924296486 |
| NCK1          | -0.281133313 | 3.225417852 | -6.043900603 | 2.96E-09 | 9.923297582 |
| AQP1          | -0.949755983 | 5.942978519 | -6.043405426 | 2.96E-09 | 9.92051032  |
| ARHGAP10      | -0.23991391  | 1.281576632 | -6.041551893 | 3.00E-09 | 9.910078877 |
| MFSD3         | 0.433606463  | 3.468405144 | 6.0403122    | 3.02E-09 | 9.903103583 |
| IGFL2         | -0.436441689 | 0.806132486 | -6.039899936 | 3.02E-09 | 9.9007842   |
| GS1-600G8.5   | -0.255269337 | 0.349864871 | -6.039296232 | 3.04E-09 | 9.897388029 |
| VAPB          | 0.238040297  | 2.839465747 | 6.039053341  | 3.04E-09 | 9.896021712 |
| VWF           | -0.582253537 | 4.035466879 | -6.038645885 | 3.05E-09 | 9.893729789 |
| MFAP3         | -0.280141094 | 2.082272033 | -6.037711935 | 3.06E-09 | 9.888476867 |
| RERG          | -0.404840419 | 1.621539677 | -6.037240862 | 3.07E-09 | 9.885827625 |
| MLK4          | 0.279815457  | 1.66157334  | 6.036033598  | 3.09E-09 | 9.879038965 |
| PYCR1         | 0.494450091  | 5.245194268 | 6.033622142  | 3.14E-09 | 9.865482426 |
| TTC39A        | 0.444868637  | 2.355680553 | 6.031028033  | 3.18E-09 | 9.850904288 |
| DDX58         | -0.379151583 | 2.999535974 | -6.029917787 | 3.20E-09 | 9.844666677 |
| COL12A1       | -0.760606898 | 2.918826259 | -6.027741223 | 3.24E-09 | 9.832441138 |
| C2orf68       | 0.238631454  | 3.504325713 | 6.027556878  | 3.25E-09 | 9.831405869 |
| CHRAC1        | 0.249005082  | 3.826606235 | 6.027535449  | 3.25E-09 | 9.831285524 |
| NFKBIL1       | 0.269807608  | 3.651695412 | 6.024706394  | 3.30E-09 | 9.815401173 |
| OSBPL2        | 0.254761621  | 2.759529574 | 6.023536365  | 3.32E-09 | 9.808833668 |

|              |              |             |              |          |             |
|--------------|--------------|-------------|--------------|----------|-------------|
| CTB-134H23.3 | -0.297403316 | 0.454419593 | -6.021301762 | 3.37E-09 | 9.796293654 |
| M6PR         | -0.29812372  | 4.428583067 | -6.020499844 | 3.38E-09 | 9.791794478 |
| NECAB1       | -0.216059987 | 0.463782034 | -6.01813271  | 3.43E-09 | 9.778516649 |
| RGS3         | -0.255370391 | 2.532566854 | -6.013540677 | 3.52E-09 | 9.752771674 |
| LCN12        | 0.334911613  | 0.754348372 | 6.01167426   | 3.56E-09 | 9.742312565 |
| GCSH         | 0.237863587  | 1.617716984 | 6.010956547  | 3.57E-09 | 9.738291364 |
| GLRX5        | 0.226072231  | 3.774931907 | 6.007650377  | 3.64E-09 | 9.719772901 |
| TMCC3        | -0.330134378 | 1.606592391 | -6.007367425 | 3.65E-09 | 9.718188444 |
| LAMP2        | -0.305577435 | 5.288833662 | -6.007217375 | 3.65E-09 | 9.71734823  |
| CST6         | -0.90173056  | 3.267184669 | -6.00328378  | 3.74E-09 | 9.695328294 |
| TYMSOS       | 0.281202879  | 0.805187398 | 6.002337782  | 3.76E-09 | 9.690034532 |
| ARHGAP24     | -0.263295561 | 1.443252062 | -6.001347408 | 3.78E-09 | 9.684493223 |
| CD58         | -0.301059941 | 3.235586659 | -6.000011232 | 3.81E-09 | 9.677018338 |
| CKMT1B       | 0.372657824  | 0.799418591 | 5.99675343   | 3.88E-09 | 9.658799465 |
| MATN3        | -0.497331008 | 1.75663143  | -5.99503096  | 3.92E-09 | 9.649170215 |
| C16orf59     | 0.355862698  | 1.611915141 | 5.993045175  | 3.96E-09 | 9.638071899 |
| SH3GLB1      | -0.207463124 | 4.196548722 | -5.992919439 | 3.96E-09 | 9.637369282 |
| CXCR2        | -0.231218567 | 0.543241962 | -5.991835424 | 3.99E-09 | 9.631312306 |
| COL25A1      | 0.574039344  | 0.592104578 | 5.990915498  | 4.01E-09 | 9.626172926 |
| BMP1         | -0.3857604   | 2.696750366 | -5.990217746 | 4.03E-09 | 9.622275229 |
| MZT2A        | 0.304783072  | 2.84859405  | 5.989970156  | 4.03E-09 | 9.620892261 |
| WDR45B       | 0.314693462  | 5.41086191  | 5.98673557   | 4.11E-09 | 9.602829381 |
| KANK3        | -0.285775061 | 1.117490177 | -5.986174901 | 4.12E-09 | 9.599699297 |
| VAR5         | 0.300384205  | 4.495374408 | 5.986099039  | 4.12E-09 | 9.599275802 |
| MCF2L-AS1    | 0.435821891  | 1.503444696 | 5.98483725   | 4.15E-09 | 9.592232537 |
| PDLIM7       | -0.398704814 | 3.711559991 | -5.980415491 | 4.26E-09 | 9.567560558 |
| GPR125       | 0.284942745  | 2.187460734 | 5.980090617  | 4.27E-09 | 9.565748489 |
| LTBR         | 0.332774388  | 4.617097663 | 5.979388538  | 4.28E-09 | 9.561832754 |
| SPHK1        | -0.469893068 | 1.993607179 | -5.979100343 | 4.29E-09 | 9.560225506 |
| RLTPR        | -0.317132568 | 0.939253247 | -5.978816052 | 4.30E-09 | 9.558640098 |
| COMP         | -0.900991787 | 3.076531764 | -5.975983179 | 4.37E-09 | 9.542845538 |
| NCAM2        | -0.291372762 | 0.83264056  | -5.972692941 | 4.45E-09 | 9.5245091   |
| CMPK2        | -0.408936102 | 2.195410791 | -5.969880658 | 4.52E-09 | 9.508843223 |

|          |              |             |              |          |             |
|----------|--------------|-------------|--------------|----------|-------------|
| PRKD3    | -0.300209711 | 2.450725664 | -5.96922803  | 4.54E-09 | 9.505208655 |
| FAM129A  | -0.512470129 | 3.116942778 | -5.9688504   | 4.55E-09 | 9.503105745 |
| CBX2     | 0.530691062  | 1.764689193 | 5.968379268  | 4.56E-09 | 9.500482317 |
| RAPGEF1  | -0.294660239 | 3.856171688 | -5.967570093 | 4.58E-09 | 9.495976957 |
| CYHR1    | 0.275735541  | 2.839878588 | 5.967254891  | 4.59E-09 | 9.494222102 |
| DIAPH2   | -0.259982782 | 1.783134034 | -5.966097355 | 4.62E-09 | 9.487778334 |
| APOBEC3F | -0.285339511 | 1.636310024 | -5.965727229 | 4.63E-09 | 9.485718147 |
| CORO7    | -0.225454781 | 1.458416226 | -5.963024262 | 4.70E-09 | 9.470676309 |
| POLD2    | 0.301431838  | 4.676500058 | 5.961111152  | 4.76E-09 | 9.460033542 |
| ACAD10   | 0.236312134  | 2.114499889 | 5.96039299   | 4.78E-09 | 9.456039119 |
| ATXN2    | 0.211914303  | 2.159198621 | 5.9592237    | 4.81E-09 | 9.44953641  |
| MRPS28   | 0.343252157  | 3.136705886 | 5.958426113  | 4.83E-09 | 9.44510147  |
| NCL      | 0.261981363  | 6.347351878 | 5.956745048  | 4.88E-09 | 9.435755672 |
| LETM1    | 0.241646582  | 2.975203749 | 5.955194704  | 4.92E-09 | 9.427138644 |
| MBNL1    | -0.292846595 | 4.195660811 | -5.954915484 | 4.93E-09 | 9.425586904 |
| FAM92B   | -0.545831296 | 0.994979348 | -5.953865939 | 4.96E-09 | 9.419754725 |
| NUP35    | 0.207870787  | 2.052762914 | 5.952756479  | 4.99E-09 | 9.41359057  |
| GLTPD2   | 0.546244791  | 1.168862198 | 5.95193629   | 5.01E-09 | 9.409034246 |
| TNXB     | -0.437283048 | 1.093859006 | -5.949546456 | 5.08E-09 | 9.395761314 |
| TCTEX1D1 | -0.258862446 | 0.445028817 | -5.949302044 | 5.09E-09 | 9.394404131 |
| C21orf59 | 0.230429734  | 2.865404085 | 5.947573586  | 5.14E-09 | 9.384807649 |
| COASY    | 0.229036756  | 4.521794452 | 5.944791927  | 5.22E-09 | 9.369368809 |
| IMPA2    | 0.512294131  | 4.234897611 | 5.941409682  | 5.32E-09 | 9.350605022 |
| NT5M     | 0.284372343  | 1.146605093 | 5.939611072  | 5.38E-09 | 9.340630585 |
| SAP30L   | -0.218579543 | 2.439416912 | -5.937825935 | 5.43E-09 | 9.330733452 |
| HMGB3    | 0.71573995   | 5.689680536 | 5.93704871   | 5.45E-09 | 9.32642518  |
| ASPHD2   | -0.355939775 | 1.404293096 | -5.936367002 | 5.48E-09 | 9.322646773 |
| VAR52    | 0.259488212  | 2.605530668 | 5.936103036  | 5.48E-09 | 9.321183828 |
| RAB29    | -0.323102692 | 3.008563778 | -5.934803955 | 5.53E-09 | 9.313984914 |
| MRPL3    | 0.262570942  | 5.11602133  | 5.934581513  | 5.53E-09 | 9.31275238  |
| CXXC4    | 0.405884504  | 1.077658289 | 5.931930192  | 5.62E-09 | 9.298064692 |
| TRIM16L  | 0.59626473   | 1.746941509 | 5.931832054  | 5.62E-09 | 9.297521141 |
| GNG10    | -0.264273769 | 2.854470853 | -5.926850888 | 5.78E-09 | 9.26994246  |

|                |              |             |              |          |             |
|----------------|--------------|-------------|--------------|----------|-------------|
| YWHAH          | -0.236273395 | 6.062049865 | -5.926445087 | 5.79E-09 | 9.26769659  |
| GSN            | -0.408783042 | 5.270959739 | -5.921443122 | 5.96E-09 | 9.24002462  |
| ETNPPL         | 0.372859296  | 0.324026658 | 5.920661096  | 5.99E-09 | 9.235700118 |
| PRKCDBP        | -0.461652074 | 3.290292237 | -5.920279704 | 6.00E-09 | 9.233591247 |
| HCG4P3         | -0.259660637 | 0.945370113 | -5.919583268 | 6.02E-09 | 9.229740675 |
| RP11-720N19.1  | 0.420684119  | 0.773131045 | 5.919183752  | 6.04E-09 | 9.227531943 |
| KIAA0922       | -0.313158869 | 2.229661019 | -5.919043087 | 6.04E-09 | 9.226754303 |
| KIAA1958       | 0.206196872  | 1.064629385 | 5.917228929  | 6.11E-09 | 9.216726521 |
| BAG1           | 0.366538087  | 3.673028749 | 5.917192408  | 6.11E-09 | 9.216524678 |
| RP11-59D5__B.2 | 0.509638962  | 1.182624254 | 5.914845801  | 6.19E-09 | 9.203557812 |
| RAB37          | -0.41405526  | 1.295268416 | -5.910146188 | 6.36E-09 | 9.177602135 |
| CORO2B         | -0.261773408 | 0.769121551 | -5.909736922 | 6.37E-09 | 9.175342633 |
| TMEM68         | 0.245912714  | 2.011531786 | 5.908954047  | 6.40E-09 | 9.171020865 |
| TMEM37         | -0.54021651  | 2.989061656 | -5.9069697   | 6.47E-09 | 9.160068735 |
| SLCO3A1        | -0.364874391 | 2.141523609 | -5.906946813 | 6.47E-09 | 9.159942437 |
| PLBD1          | -0.575675428 | 3.743513198 | -5.906001446 | 6.51E-09 | 9.15472585  |
| SEL1L          | -0.30511613  | 4.012905893 | -5.905868681 | 6.51E-09 | 9.153993304 |
| SNRPB          | 0.357883701  | 6.978152516 | 5.904742307  | 6.55E-09 | 9.147778978 |
| LINC00473      | 0.569091908  | 0.601575217 | 5.904064818  | 6.58E-09 | 9.144041697 |
| GPATCH4        | 0.290163296  | 3.230869578 | 5.902514223  | 6.64E-09 | 9.13548944  |
| DAK            | 0.248688639  | 2.699092344 | 5.902109383  | 6.65E-09 | 9.133256877 |
| GAB1           | -0.249752244 | 1.660901946 | -5.901880223 | 6.66E-09 | 9.13199319  |
| IGHD2-15       | -0.481316401 | 0.614055846 | -5.901074576 | 6.69E-09 | 9.127550854 |
| TARBP2         | 0.253310797  | 3.045652203 | 5.900240491  | 6.72E-09 | 9.122952266 |
| FCGBP          | -0.735044361 | 2.182540269 | -5.894752368 | 6.94E-09 | 9.0927085   |
| RP11-539L10.3  | 0.400523851  | 1.94833341  | 5.894582414  | 6.94E-09 | 9.091772313 |
| IGLV5-48       | -0.515884906 | 0.919610499 | -5.893735088 | 6.98E-09 | 9.087105196 |
| SFMBT2         | -0.319858917 | 1.24929931  | -5.891014349 | 7.08E-09 | 9.072123152 |
| CRACR2B        | 0.536888891  | 3.104039957 | 5.890989163  | 7.08E-09 | 9.071984486 |
| PWWP2B         | 0.322048379  | 3.506710797 | 5.88888536   | 7.17E-09 | 9.060403837 |
| PCBD1          | 0.298124796  | 5.52499843  | 5.887802706  | 7.21E-09 | 9.054445627 |
| RP11-111M22.3  | 0.364240746  | 2.111970016 | 5.88697261   | 7.25E-09 | 9.049877974 |
| JUNB           | -0.42536461  | 6.502489729 | -5.886176354 | 7.28E-09 | 9.045497058 |

|               |              |             |              |          |             |
|---------------|--------------|-------------|--------------|----------|-------------|
| NDUFB9        | 0.364115508  | 5.572775864 | 5.886030382  | 7.29E-09 | 9.044693993 |
| PUS1          | 0.283866256  | 2.340315745 | 5.88548424   | 7.31E-09 | 9.041689537 |
| ANKRD9        | 0.335052367  | 1.935253741 | 5.884485158  | 7.35E-09 | 9.036193984 |
| IGKV1D-43     | -0.576451659 | 1.125264224 | -5.883407296 | 7.39E-09 | 9.030266001 |
| H1FO          | 0.370472916  | 7.047505612 | 5.881758412  | 7.46E-09 | 9.021199357 |
| AC244250.1    | -0.4165804   | 0.575278002 | -5.880644332 | 7.51E-09 | 9.015074668 |
| SEMA3D        | -0.233288273 | 0.491927996 | -5.878099283 | 7.62E-09 | 9.001086968 |
| LTF           | -1.051641429 | 3.501644976 | -5.878068876 | 7.62E-09 | 9.000919884 |
| IGKV2D-24     | -0.633436994 | 1.363326082 | -5.874665622 | 7.77E-09 | 8.982223767 |
| NARS          | 0.253714157  | 5.079986449 | 5.874365847  | 7.78E-09 | 8.980577375 |
| C2orf47       | 0.209958087  | 3.386352201 | 5.870977656  | 7.93E-09 | 8.961974187 |
| FAM20A        | -0.522838128 | 3.149944286 | -5.869584097 | 7.99E-09 | 8.954325428 |
| PYCR2         | 0.240382326  | 4.459776897 | 5.86886078   | 8.03E-09 | 8.95035602  |
| MRPL12        | 0.384311467  | 4.504924513 | 5.868411617  | 8.05E-09 | 8.947891319 |
| FAM101A       | -0.502418243 | 1.21031117  | -5.866566276 | 8.13E-09 | 8.937767076 |
| NINL          | 0.376813843  | 2.103170655 | 5.864911809  | 8.21E-09 | 8.928692403 |
| KANK2         | -0.309949345 | 3.526206099 | -5.864533192 | 8.23E-09 | 8.926616013 |
| NUPR1         | -0.52102867  | 3.718918216 | -5.864405986 | 8.23E-09 | 8.925918428 |
| DNMT3A        | 0.290634421  | 2.41355218  | 5.863990463  | 8.25E-09 | 8.923639822 |
| MTG2          | 0.256814252  | 2.838258879 | 5.863176357  | 8.29E-09 | 8.919175914 |
| NUAK1         | -0.386102169 | 2.150836805 | -5.863008507 | 8.30E-09 | 8.918255629 |
| PIM3          | 0.385273665  | 5.598900525 | 5.860289889  | 8.42E-09 | 8.903353178 |
| CARD11        | -0.556745114 | 2.729979775 | -5.859029242 | 8.48E-09 | 8.896444822 |
| TXNRD2        | 0.270570063  | 2.351102378 | 5.858441386  | 8.51E-09 | 8.893223805 |
| SIPA1         | -0.278031135 | 3.895504986 | -5.857571451 | 8.55E-09 | 8.888457727 |
| TK2           | -0.278991415 | 2.618280359 | -5.857316466 | 8.57E-09 | 8.887060867 |
| GPX2          | 1.532833758  | 3.487614538 | 5.855429968  | 8.66E-09 | 8.876727892 |
| TRPM2         | -0.371352082 | 1.725907322 | -5.855194518 | 8.67E-09 | 8.875438457 |
| ASPSR1        | 0.315429985  | 2.144047936 | 5.854801383  | 8.69E-09 | 8.873285563 |
| PTS           | 0.261917438  | 2.637946609 | 5.852132545  | 8.82E-09 | 8.858673769 |
| GNL2          | 0.215994205  | 3.683643347 | 5.851960788  | 8.83E-09 | 8.857733599 |
| RP11-289I10.2 | -0.37239556  | 2.398243954 | -5.851893582 | 8.83E-09 | 8.857365735 |
| SNAI1         | -0.41578661  | 1.980738193 | -5.850828286 | 8.89E-09 | 8.851535103 |

|              |              |             |              |          |             |
|--------------|--------------|-------------|--------------|----------|-------------|
| MFAP2        | -0.536819184 | 3.193435461 | -5.849705136 | 8.94E-09 | 8.845388821 |
| PLAGL1       | -0.335182598 | 1.406044555 | -5.848139142 | 9.02E-09 | 8.836820856 |
| RAB3D        | 0.326864749  | 3.254006113 | 5.846641731  | 9.10E-09 | 8.828629991 |
| MICAL2       | -0.433073788 | 3.140911012 | -5.846639651 | 9.10E-09 | 8.828618617 |
| ANAPC7       | 0.2221945    | 3.146421339 | 5.846350698  | 9.11E-09 | 8.827038247 |
| TIGD5        | 0.24416952   | 1.746517739 | 5.845291004  | 9.17E-09 | 8.82124306  |
| NPM1P25      | -0.230516984 | 0.882959211 | -5.844654126 | 9.20E-09 | 8.817760583 |
| RNF122       | -0.286971739 | 2.615183786 | -5.843944256 | 9.24E-09 | 8.813879368 |
| SNRPC        | 0.260493121  | 5.895637969 | 5.841761531  | 9.35E-09 | 8.801947898 |
| ACP2         | -0.229415431 | 4.259280294 | -5.841612535 | 9.36E-09 | 8.801133581 |
| ANKH         | -0.366845582 | 2.740719181 | -5.841602736 | 9.36E-09 | 8.801080025 |
| GPC6         | -0.520182247 | 1.657102281 | -5.841484793 | 9.36E-09 | 8.800435438 |
| NDUFV1       | 0.244647334  | 4.925535716 | 5.841074674  | 9.39E-09 | 8.798194119 |
| TIMM23       | 0.233567968  | 5.353202802 | 5.840472299  | 9.42E-09 | 8.79490237  |
| SS18L1       | 0.311292032  | 2.471733369 | 5.840161628  | 9.43E-09 | 8.793204782 |
| RP13-582O9.7 | 0.311594191  | 1.335796219 | 5.838109834  | 9.54E-09 | 8.781995237 |
| ELMO1        | -0.336268622 | 1.728098685 | -5.837685901 | 9.57E-09 | 8.779679597 |
| BMPR2        | -0.248625783 | 3.231958519 | -5.833926997 | 9.77E-09 | 8.759153819 |
| DARS2        | 0.320725757  | 3.383056425 | 5.833472225  | 9.80E-09 | 8.756671286 |
| MRPL42       | 0.209830751  | 2.057767023 | 5.830030037  | 9.99E-09 | 8.73788634  |
| RP11-44K6.2  | -0.525216642 | 1.02773898  | -5.829722169 | 1.00E-08 | 8.736206691 |
| PROSER1      | 0.281979982  | 2.979595181 | 5.829591799  | 1.00E-08 | 8.735495452 |
| IGLV4-3      | -0.539837096 | 0.922750791 | -5.828743309 | 1.01E-08 | 8.730866804 |
| DVL2         | 0.227956262  | 2.85163948  | 5.828545323  | 1.01E-08 | 8.729786841 |
| TIGD3        | 0.20152403   | 0.621147116 | 5.827486045  | 1.01E-08 | 8.724009303 |
| PYCRL        | 0.343915246  | 2.975893498 | 5.821834106  | 1.05E-08 | 8.693197852 |
| RP3-407E4.2  | 0.510273701  | 1.005502813 | 5.819880515  | 1.06E-08 | 8.682553946 |
| COX5A        | 0.283216888  | 5.661508599 | 5.815239511  | 1.08E-08 | 8.657280485 |
| RP11-344B5.2 | -0.430747931 | 1.72741614  | -5.814790243 | 1.09E-08 | 8.654834844 |
| IGHV3-16     | -0.229513645 | 0.294454667 | -5.814123402 | 1.09E-08 | 8.651205125 |
| RNY4P19      | 0.409787568  | 0.741749296 | 5.813805822  | 1.09E-08 | 8.649476618 |
| RCN2         | 0.261327922  | 2.973198458 | 5.813805135  | 1.09E-08 | 8.649472878 |
| SLC7A11      | 0.666848007  | 1.83079022  | 5.812629245  | 1.10E-08 | 8.643073518 |

|              |              |             |              |          |             |
|--------------|--------------|-------------|--------------|----------|-------------|
| RP5-963E22.6 | 0.26102174   | 0.975772224 | 5.812060995  | 1.10E-08 | 8.639981427 |
| METAP1D      | 0.211277885  | 1.244502375 | 5.810998974  | 1.11E-08 | 8.634203218 |
| FBRSL1       | 0.310786645  | 2.844172411 | 5.810855163  | 1.11E-08 | 8.63342085  |
| GSAP         | -0.324402018 | 2.173076683 | -5.810610925 | 1.11E-08 | 8.632092165 |
| ALKBH2       | 0.280977654  | 2.559231167 | 5.809937606  | 1.12E-08 | 8.628429484 |
| XRN1         | -0.237087813 | 2.225288903 | -5.809805399 | 1.12E-08 | 8.62771036  |
| SEMA5A       | -0.392229787 | 1.32694043  | -5.808920892 | 1.12E-08 | 8.62289953  |
| MRPS15       | 0.299265307  | 4.572724911 | 5.807544457  | 1.13E-08 | 8.615414379 |
| TCEA1        | 0.284841426  | 4.314238433 | 5.807403033  | 1.13E-08 | 8.614645391 |
| TAPT1-AS1    | 0.218798924  | 1.009057214 | 5.806284136  | 1.14E-08 | 8.608562021 |
| MRPS2        | 0.256562998  | 4.002122705 | 5.805787414  | 1.14E-08 | 8.605861702 |
| ZNF48        | 0.240424949  | 2.368124412 | 5.803915937  | 1.16E-08 | 8.595689646 |
| PPP1R14B     | 0.372867135  | 5.783479931 | 5.80359777   | 1.16E-08 | 8.593960594 |
| SNRPEP2      | 0.239712944  | 1.592148009 | 5.802325474  | 1.17E-08 | 8.587047239 |
| DDX55        | 0.239329482  | 2.342046061 | 5.800798896  | 1.18E-08 | 8.578753922 |
| TUFT1        | 0.346483784  | 3.603624228 | 5.799985783  | 1.18E-08 | 8.574337363 |
| PTEN         | -0.211029178 | 2.997832862 | -5.798659974 | 1.19E-08 | 8.567137173 |
| LONP1        | 0.265148138  | 4.257865604 | 5.796954939  | 1.20E-08 | 8.557879599 |
| GGA2         | -0.254893906 | 3.889425948 | -5.796431321 | 1.21E-08 | 8.555037065 |
| ENSA         | 0.243060098  | 5.359845964 | 5.794334656  | 1.22E-08 | 8.543657267 |
| DNA2         | 0.309906113  | 1.42629113  | 5.792546541  | 1.23E-08 | 8.533954988 |
| IGLJ3        | -0.301028539 | 0.484980982 | -5.789655748 | 1.25E-08 | 8.518275134 |
| NDUFAF6      | 0.267220755  | 1.924768844 | 5.789359459  | 1.25E-08 | 8.516668427 |
| ARTN         | 0.364509753  | 0.78636691  | 5.788658873  | 1.26E-08 | 8.512869602 |
| VPS72        | 0.261504346  | 3.829214446 | 5.787309668  | 1.27E-08 | 8.505554863 |
| SETX         | -0.242835375 | 2.941223828 | -5.787140994 | 1.27E-08 | 8.5046405   |
| PHLDB1       | -0.270502632 | 1.941073292 | -5.78703265  | 1.27E-08 | 8.504053186 |
| MDH2         | 0.258768758  | 5.840063651 | 5.786908736  | 1.27E-08 | 8.503381488 |
| BEND3        | 0.203916354  | 1.250795166 | 5.785640415  | 1.28E-08 | 8.496507036 |
| SARS2        | 0.248413212  | 1.523701382 | 5.783728957  | 1.29E-08 | 8.486149195 |
| IGHV3-22     | -0.382538251 | 0.724254609 | -5.780982381 | 1.31E-08 | 8.471271229 |
| CSNK2B       | 0.229512052  | 4.232708895 | 5.780441639  | 1.32E-08 | 8.468342808 |
| SMPD4        | 0.236199591  | 3.337763912 | 5.77963003   | 1.32E-08 | 8.463947929 |

|               |              |             |              |          |             |
|---------------|--------------|-------------|--------------|----------|-------------|
| PDE1A         | -0.255593585 | 0.933713881 | -5.778261299 | 1.33E-08 | 8.456537457 |
| PGAM5         | 0.306656666  | 3.828543889 | 5.777022644  | 1.34E-08 | 8.449832546 |
| BNIP3         | 0.421321235  | 4.015104122 | 5.776510502  | 1.35E-08 | 8.447060662 |
| SMUG1         | 0.251292907  | 2.939712616 | 5.776415911  | 1.35E-08 | 8.446548727 |
| ATAT1         | 0.314944546  | 2.213049559 | 5.775965249  | 1.35E-08 | 8.444109807 |
| SOCS7         | 0.308711731  | 2.091328977 | 5.773722623  | 1.37E-08 | 8.431975483 |
| SLC16A14      | 0.767126905  | 2.186201737 | 5.773222711  | 1.37E-08 | 8.429271138 |
| MAN2A1        | -0.309908652 | 2.682845336 | -5.772685546 | 1.38E-08 | 8.426365498 |
| LIPM          | -0.306092307 | 0.830294919 | -5.768999625 | 1.40E-08 | 8.406433932 |
| PKP3          | 0.385892464  | 4.437684973 | 5.768181736  | 1.41E-08 | 8.402012712 |
| RP11-116O18.1 | 0.799945551  | 0.793071119 | 5.766948681  | 1.42E-08 | 8.395348296 |
| ZNF768        | 0.285224536  | 4.258976978 | 5.766264851  | 1.43E-08 | 8.391652867 |
| RPS10L        | 0.214116636  | 0.751943511 | 5.766107324  | 1.43E-08 | 8.390801641 |
| ATAD3A        | 0.312315802  | 3.261938751 | 5.7646592    | 1.44E-08 | 8.382977408 |
| PRICKLE2      | -0.250079514 | 1.360582146 | -5.763514974 | 1.45E-08 | 8.376796352 |
| RP11-973H7.3  | 0.200428303  | 1.194734456 | 5.763145009  | 1.45E-08 | 8.374798046 |
| PTP4A1        | 0.433005193  | 5.729741672 | 5.762246507  | 1.46E-08 | 8.369945405 |
| TAB2          | -0.231925989 | 4.023454861 | -5.759845177 | 1.48E-08 | 8.356979521 |
| GALNT10       | -0.427020596 | 3.603884806 | -5.759372269 | 1.48E-08 | 8.354426628 |
| VEGFC         | -0.459491195 | 1.973234406 | -5.758828607 | 1.49E-08 | 8.351492014 |
| HDGF          | 0.287331094  | 6.73346424  | 5.75827025   | 1.49E-08 | 8.348478333 |
| KDM1A         | 0.239727044  | 4.115350768 | 5.757741312  | 1.49E-08 | 8.34562367  |
| RALY-AS1      | 0.247335447  | 1.525363328 | 5.756782253  | 1.50E-08 | 8.340448244 |
| DCAF13        | 0.28510824   | 2.789566841 | 5.755897182  | 1.51E-08 | 8.33567275  |
| IGLV10-54     | -1.030244658 | 3.234007325 | -5.755635834 | 1.51E-08 | 8.334262743 |
| PTPN1         | -0.28105197  | 4.512779781 | -5.754304927 | 1.52E-08 | 8.327083194 |
| PRR3          | 0.227404737  | 2.285452044 | 5.751820005  | 1.54E-08 | 8.313682215 |
| LRRC1         | 0.272355446  | 2.638117031 | 5.751579771  | 1.55E-08 | 8.312386923 |
| SNRPF         | 0.305041109  | 3.773680153 | 5.750723897  | 1.55E-08 | 8.307772608 |
| KCNJ2         | -0.325112099 | 1.117016331 | -5.750557209 | 1.56E-08 | 8.306874003 |
| C1orf210      | 0.409441697  | 3.927918234 | 5.749800144  | 1.56E-08 | 8.302793009 |
| MZT2B         | 0.337964956  | 4.759190782 | 5.747463763  | 1.58E-08 | 8.290201592 |
| PARP9         | -0.291259202 | 3.64585117  | -5.746325389 | 1.59E-08 | 8.284068196 |



|               |              |             |              |          |             |
|---------------|--------------|-------------|--------------|----------|-------------|
| HOXA5         | -0.355505982 | 1.883475354 | -5.746227619 | 1.59E-08 | 8.283541476 |
| NOC2L         | 0.276591087  | 4.181590836 | 5.74406594   | 1.61E-08 | 8.271897758 |
| ZNF74         | 0.232628852  | 1.746691353 | 5.743979811  | 1.61E-08 | 8.271433909 |
| GLS           | -0.573171775 | 3.941240608 | -5.7422459   | 1.63E-08 | 8.262097226 |
| SAC3D1        | 0.289258019  | 2.825848313 | 5.741547438  | 1.64E-08 | 8.258336877 |
| TSEN54        | 0.257104386  | 3.66985909  | 5.739976706  | 1.65E-08 | 8.249881899 |
| RNASEL        | -0.242803212 | 2.014811343 | -5.737308719 | 1.67E-08 | 8.235525235 |
| BZW2          | 0.311433876  | 4.72280351  | 5.736705653  | 1.68E-08 | 8.232280895 |
| RP13-977J11.2 | -0.242170189 | 0.93326022  | -5.734128436 | 1.70E-08 | 8.218419493 |
| RB1           | -0.264637943 | 3.048754226 | -5.732578542 | 1.72E-08 | 8.210086114 |
| GSR           | 0.488931671  | 5.064474775 | 5.732111903  | 1.72E-08 | 8.207577503 |
| RRP12         | 0.266521129  | 2.801035445 | 5.731845166  | 1.73E-08 | 8.206143625 |
| ARHGEF25      | -0.322831714 | 1.852336252 | -5.731832955 | 1.73E-08 | 8.206077987 |
| RHPN1-AS1     | 0.269605916  | 1.157183464 | 5.731258486  | 1.73E-08 | 8.202990066 |
| POP5          | 0.253630894  | 3.373250677 | 5.730682759  | 1.74E-08 | 8.199895657 |
| EFNB1         | -0.453585524 | 3.156737876 | -5.728815465 | 1.75E-08 | 8.189861227 |
| PPM1F         | -0.227928937 | 2.003643146 | -5.728528196 | 1.76E-08 | 8.18831776  |
| RNFT2         | 0.321356239  | 0.896121652 | 5.728161888  | 1.76E-08 | 8.186349719 |
| KLHL23        | 0.346680904  | 2.402249014 | 5.727855159  | 1.76E-08 | 8.184701864 |
| IGHV3OR16-7   | -0.22198176  | 0.315428183 | -5.727731467 | 1.77E-08 | 8.184037371 |
| AHCY          | 0.311459548  | 5.432709465 | 5.727276006  | 1.77E-08 | 8.181590658 |
| UCHL5         | 0.206982987  | 2.952326633 | 5.724924386  | 1.79E-08 | 8.168960612 |
| FH            | 0.238599558  | 4.934538501 | 5.722855984  | 1.81E-08 | 8.157855428 |
| PTOV1         | 0.248048953  | 4.183838112 | 5.722188683  | 1.82E-08 | 8.154273459 |
| TSEN34        | 0.224389662  | 4.067891282 | 5.721919538  | 1.82E-08 | 8.15282883  |
| IGLV2-28      | -0.512251036 | 1.248659802 | -5.721880351 | 1.82E-08 | 8.152618501 |
| GSTO1         | -0.335790631 | 5.606682443 | -5.721858389 | 1.82E-08 | 8.152500626 |
| PROS1         | -0.457039179 | 3.255960062 | -5.721354868 | 1.83E-08 | 8.149798181 |
| TMEM158       | -0.460422982 | 1.442564961 | -5.718864353 | 1.85E-08 | 8.136434415 |
| NAT8L         | 0.358835174  | 0.575640136 | 5.717032581  | 1.87E-08 | 8.126608632 |
| RP11-98G7.1   | 0.255044511  | 0.467952312 | 5.712887313  | 1.92E-08 | 8.104383243 |
| OMG           | -0.381755038 | 0.691316393 | -5.712271191 | 1.92E-08 | 8.101081027 |
| RP11-379F4.7  | -0.224587941 | 1.122457557 | -5.711756158 | 1.93E-08 | 8.098320861 |

|                |              |             |              |          |             |
|----------------|--------------|-------------|--------------|----------|-------------|
| FAM213A        | 0.244868884  | 3.589207275 | 5.710784952  | 1.94E-08 | 8.09311656  |
| AKR1C2         | 1.429761519  | 2.635491437 | 5.71064036   | 1.94E-08 | 8.092341817 |
| PABPN1         | 0.292907837  | 4.472975873 | 5.706948865  | 1.98E-08 | 8.072568098 |
| CTPS2          | 0.244137759  | 2.757888364 | 5.706262292  | 1.99E-08 | 8.068891669 |
| RBFA           | 0.229807856  | 2.479356524 | 5.704895073  | 2.00E-08 | 8.061571693 |
| C12orf56       | 0.285203692  | 0.387858968 | 5.704079249  | 2.01E-08 | 8.057204573 |
| PURA           | -0.219611882 | 1.856400437 | -5.701758552 | 2.04E-08 | 8.044784841 |
| TBX3           | -0.319865676 | 1.373703903 | -5.701474147 | 2.04E-08 | 8.043263087 |
| RP1-63M2.7     | 0.330805155  | 1.047895564 | 5.699174804  | 2.07E-08 | 8.030962542 |
| NDUFV2         | 0.261788363  | 2.510417835 | 5.698044929  | 2.08E-08 | 8.024919765 |
| RAB26          | 0.387690524  | 1.150040489 | 5.697077726  | 2.09E-08 | 8.019747822 |
| IGLV9-49       | -0.989958684 | 3.085032712 | -5.696928987 | 2.09E-08 | 8.018952535 |
| ZNF219         | 0.355240787  | 2.187302176 | 5.696655067  | 2.10E-08 | 8.017487973 |
| AC010136.2     | 0.313287129  | 0.824905789 | 5.696072533  | 2.10E-08 | 8.014373552 |
| BCL2           | -0.374184117 | 1.453047454 | -5.69598541  | 2.10E-08 | 8.01390779  |
| NSMF           | 0.359163074  | 3.520616803 | 5.695697874  | 2.11E-08 | 8.01237065  |
| RP3-407E4.3    | 0.373490763  | 0.576327475 | 5.693944823  | 2.13E-08 | 8.003000482 |
| MAGIX          | 0.294589578  | 1.47302491  | 5.689995662  | 2.17E-08 | 7.981901245 |
| WDR77          | 0.221463522  | 3.487149891 | 5.688601802  | 2.19E-08 | 7.974457318 |
| GAS8           | 0.263847016  | 2.303532779 | 5.68302814   | 2.26E-08 | 7.944707092 |
| ALG3           | 0.278002278  | 4.084307635 | 5.681981823  | 2.27E-08 | 7.939125075 |
| KPTN           | 0.283666933  | 2.286958621 | 5.680403742  | 2.29E-08 | 7.930707853 |
| ATM            | -0.23330455  | 1.691886906 | -5.679944647 | 2.30E-08 | 7.928259498 |
| PARP11         | -0.214982638 | 1.316029853 | -5.6798341   | 2.30E-08 | 7.927669978 |
| PPM1G          | 0.223944112  | 5.202171282 | 5.67966716   | 2.30E-08 | 7.926779748 |
| RP11-286N22.16 | 0.323945803  | 0.603417332 | 5.677622931  | 2.33E-08 | 7.915880453 |
| AGBL5          | 0.241946144  | 2.896878148 | 5.677086094  | 2.33E-08 | 7.913018754 |
| FAM216B        | -0.561349354 | 0.898158121 | -5.677007146 | 2.33E-08 | 7.912597928 |
| 6-Mar          | 0.288277623  | 4.13021743  | 5.676710081  | 2.34E-08 | 7.911014492 |
| CD36           | -0.477179635 | 1.494335329 | -5.673665793 | 2.38E-08 | 7.894791826 |
| ATP6V1B1       | 0.51836078   | 1.141056855 | 5.671653471  | 2.40E-08 | 7.884072586 |
| DENND2D        | -0.25029165  | 3.164301982 | -5.670352785 | 2.42E-08 | 7.877145864 |
| TMEM69         | 0.211877293  | 3.610430724 | 5.666023198  | 2.48E-08 | 7.854098974 |

|               |              |             |              |          |             |
|---------------|--------------|-------------|--------------|----------|-------------|
| ADPRHL1       | 0.385366346  | 1.643354633 | 5.66265804   | 2.52E-08 | 7.836196528 |
| KAZALD1       | 0.365740658  | 1.800237713 | 5.660115824  | 2.56E-08 | 7.822678287 |
| BST2          | -0.564786257 | 6.752122824 | -5.658280607 | 2.59E-08 | 7.812922825 |
| SLC25A19      | -0.230211541 | 2.044967376 | -5.657385164 | 2.60E-08 | 7.808163927 |
| RPL7P9        | 0.391755546  | 3.256078306 | 5.655407221  | 2.63E-08 | 7.797654356 |
| ARHGAP22      | -0.20230623  | 0.815080676 | -5.654800206 | 2.64E-08 | 7.794429696 |
| ZNF76         | 0.237522327  | 2.81600746  | 5.654782175  | 2.64E-08 | 7.794333915 |
| APOBEC3A      | -0.289430031 | 0.696836666 | -5.653764407 | 2.65E-08 | 7.788927904 |
| IGKV1OR1-1    | -0.235955369 | 0.306036034 | -5.653022662 | 2.66E-08 | 7.784988568 |
| PDLIM5        | -0.330026129 | 3.156223813 | -5.652385924 | 2.67E-08 | 7.781607275 |
| AAAS          | 0.202581316  | 3.352183565 | 5.649898363  | 2.71E-08 | 7.76840069  |
| POLR2J        | 0.288459771  | 4.731074266 | 5.648668476  | 2.73E-08 | 7.761873052 |
| SLMO2         | 0.320637317  | 5.04992001  | 5.648409786  | 2.73E-08 | 7.760500209 |
| ECHS1         | 0.238330621  | 6.209958596 | 5.647997077  | 2.74E-08 | 7.758310118 |
| RBM47         | 0.270170655  | 4.178936407 | 5.647941145  | 2.74E-08 | 7.758013319 |
| ATL2          | 0.288468174  | 4.231642132 | 5.647864242  | 2.74E-08 | 7.757605244 |
| RP11-443B20.1 | 0.244230049  | 1.074134899 | 5.647041831  | 2.75E-08 | 7.753241528 |
| ITGA2         | -0.654875582 | 3.395897618 | -5.645547589 | 2.77E-08 | 7.745314508 |
| MMP12         | -0.919934434 | 3.232174991 | -5.644978513 | 2.78E-08 | 7.742296019 |
| MYO19         | 0.274808656  | 2.242734411 | 5.64476344   | 2.78E-08 | 7.741155302 |
| VPS37D        | 0.365640501  | 1.604155114 | 5.643711053  | 2.80E-08 | 7.73557413  |
| ANO1          | -0.525453436 | 2.155735243 | -5.642577243 | 2.82E-08 | 7.72956217  |
| PIGU          | 0.247773269  | 3.732655691 | 5.641757368  | 2.83E-08 | 7.725215489 |
| EIF5A2        | -0.247398622 | 1.079695523 | -5.640057525 | 2.86E-08 | 7.716205312 |
| RPH3AL        | 0.385785579  | 2.367516559 | 5.639375259  | 2.87E-08 | 7.712589565 |
| NR2F1-AS1     | -0.24115397  | 0.884872243 | -5.637318977 | 2.90E-08 | 7.701694403 |
| ILF2          | 0.281007402  | 6.67430081  | 5.637235818  | 2.90E-08 | 7.701253857 |
| RPL7P23       | 0.238971635  | 0.909924042 | 5.637009998  | 2.90E-08 | 7.700057584 |
| RP3-512B11.3  | 0.38754848   | 1.29139258  | 5.635494188  | 2.93E-08 | 7.692028723 |
| CTA-126B4.7   | -0.251019208 | 0.535415141 | -5.635389851 | 2.93E-08 | 7.691476146 |
| TWF2          | -0.249436882 | 4.705040955 | -5.634209198 | 2.95E-08 | 7.685223944 |
| IGKV3D-7      | -0.408242741 | 0.618328169 | -5.633195546 | 2.97E-08 | 7.679857021 |
| EHD2          | -0.46675953  | 5.127253839 | -5.631861352 | 2.99E-08 | 7.672794239 |

|               |              |             |              |          |             |
|---------------|--------------|-------------|--------------|----------|-------------|
| SUDS3         | 0.253130985  | 3.492758089 | 5.631769208  | 2.99E-08 | 7.672306515 |
| DHX34         | 0.267679493  | 2.509635859 | 5.631441411  | 2.99E-08 | 7.670571518 |
| ATP11C        | -0.273473685 | 2.008553582 | -5.630956578 | 3.00E-08 | 7.668005506 |
| IGHD4-11      | -0.320474639 | 0.325437413 | -5.630315682 | 3.01E-08 | 7.664613815 |
| TARS2         | 0.240708249  | 3.485851208 | 5.629615235  | 3.02E-08 | 7.660907364 |
| DCXR          | 0.361875088  | 4.759528576 | 5.629606112  | 3.02E-08 | 7.660859093 |
| NT5E          | -0.724614062 | 3.476311925 | -5.628845498 | 3.04E-08 | 7.65683473  |
| C1orf27       | 0.238063312  | 3.541098181 | 5.626997939  | 3.07E-08 | 7.647061403 |
| JADE2         | -0.301336798 | 2.754092696 | -5.625332303 | 3.10E-08 | 7.638252842 |
| PTPRG         | -0.339650397 | 1.927012488 | -5.625067216 | 3.10E-08 | 7.636851166 |
| RP11-686D22.4 | -0.298743756 | 1.373869803 | -5.624045115 | 3.12E-08 | 7.631447238 |
| ZNF517        | 0.245809533  | 1.816466672 | 5.623954172  | 3.12E-08 | 7.630966459 |
| PLSCR1        | -0.352108585 | 4.100716595 | -5.621419643 | 3.16E-08 | 7.617570131 |
| UBQLN4        | 0.267328087  | 4.172977378 | 5.620710558  | 3.17E-08 | 7.613823194 |
| DPYSL2        | -0.436961273 | 4.32469104  | -5.620182169 | 3.18E-08 | 7.611031356 |
| TSHZ2         | -0.22881953  | 0.691313529 | -5.618810745 | 3.21E-08 | 7.603786276 |
| SLC14A2       | 0.538633701  | 0.520010127 | 5.618434943  | 3.21E-08 | 7.601801224 |
| DST           | -0.403226817 | 1.823263115 | -5.617432835 | 3.23E-08 | 7.596508496 |
| PCSK5         | -0.245696936 | 0.913948091 | -5.616735353 | 3.24E-08 | 7.592825168 |
| AC245028.1    | -0.425769162 | 0.815276052 | -5.616522073 | 3.25E-08 | 7.591698939 |
| KRTCAP2       | 0.27866208   | 3.111086171 | 5.614705188  | 3.28E-08 | 7.582106371 |
| MSI1          | 0.505083825  | 0.854307101 | 5.61376523   | 3.30E-08 | 7.577144771 |
| MIF           | 0.410932269  | 5.300621617 | 5.6103109    | 3.36E-08 | 7.558917251 |
| EVC           | -0.289653081 | 1.921245197 | -5.609822178 | 3.37E-08 | 7.556339197 |
| PROCR         | -0.446639241 | 3.842910535 | -5.606480819 | 3.43E-08 | 7.538718546 |
| CTD-2134A5.4  | 0.297285006  | 1.422387336 | 5.606030745  | 3.44E-08 | 7.536345787 |
| GLUL          | -0.34023597  | 6.371384383 | -5.603993356 | 3.48E-08 | 7.525606916 |
| COL11A1       | -0.836391302 | 2.154123664 | -5.60370763  | 3.48E-08 | 7.52410116  |
| TMEM41B       | 0.263897079  | 3.891305657 | 5.60368034   | 3.48E-08 | 7.523957346 |
| IGKV1D-17     | -0.726961419 | 1.388005359 | -5.603285283 | 3.49E-08 | 7.521875539 |
| DCUN1D3       | -0.241806649 | 2.053396586 | -5.601915777 | 3.52E-08 | 7.514659748 |
| RP11-589N15.2 | -0.354039588 | 2.374839492 | -5.601185316 | 3.53E-08 | 7.510811656 |
| PTK2          | 0.240342619  | 3.462946174 | 5.60100107   | 3.53E-08 | 7.509841111 |

|                    |              |             |              |          |             |
|--------------------|--------------|-------------|--------------|----------|-------------|
| RP1-92O14.3        | 0.30981244   | 1.140343475 | 5.597810447  | 3.60E-08 | 7.493038482 |
| BARX1              | 0.990025503  | 1.615215156 | 5.597371802  | 3.60E-08 | 7.490729125 |
| LGALS3             | -0.42081089  | 7.074171937 | -5.595460385 | 3.64E-08 | 7.480667853 |
| MRM1               | 0.264025916  | 2.535193637 | 5.594129748  | 3.67E-08 | 7.473665462 |
| C21orf91           | -0.286818609 | 1.921935015 | -5.592551993 | 3.70E-08 | 7.465364532 |
| MYL6B              | 0.30193886   | 3.426507508 | 5.589513681  | 3.76E-08 | 7.449385094 |
| MIR8071-1          | -0.601573807 | 1.62469877  | -5.58826489  | 3.79E-08 | 7.442819528 |
| PPAPDC1A           | -0.427911716 | 0.973454093 | -5.586452024 | 3.82E-08 | 7.433290617 |
| RP11-705C15.3      | -0.253054987 | 1.36788624  | -5.585861276 | 3.84E-08 | 7.430186075 |
| RP11-5C23.1        | -0.254674201 | 1.763532005 | -5.585818422 | 3.84E-08 | 7.429960879 |
| SCT                | -0.328359284 | 1.031104429 | -5.585774911 | 3.84E-08 | 7.429732228 |
| RAP1B              | -0.238917408 | 1.987626945 | -5.584701913 | 3.86E-08 | 7.424094152 |
| PDF                | 0.203125924  | 1.33150188  | 5.583804647  | 3.88E-08 | 7.419380189 |
| MMD                | -0.427418546 | 3.166598635 | -5.583706593 | 3.88E-08 | 7.418865087 |
| SMURF2             | -0.343443405 | 3.297174282 | -5.583441672 | 3.89E-08 | 7.417473422 |
| MGAT4A             | -0.322453611 | 2.70271264  | -5.583187203 | 3.89E-08 | 7.416136716 |
| RAB3IP             | 0.347375568  | 1.83962436  | 5.583114591  | 3.89E-08 | 7.4157553   |
| XXbac-BPG248L24.12 | -0.317427987 | 1.689943339 | -5.580363409 | 3.95E-08 | 7.401307171 |
| IGLV4-60           | -0.975079376 | 2.948234859 | -5.579630144 | 3.97E-08 | 7.397457412 |
| MIAT               | -0.466150774 | 1.163916712 | -5.578644141 | 3.99E-08 | 7.39228144  |
| ZC3H3              | 0.274768728  | 3.322912338 | 5.578345512  | 4.00E-08 | 7.390713964 |
| GPX1               | -0.346813635 | 7.491134282 | -5.577180567 | 4.02E-08 | 7.384599972 |
| TNIP3              | -0.36652554  | 0.799573653 | -5.577067687 | 4.02E-08 | 7.384007601 |
| MSTO1              | 0.241949266  | 2.257489525 | 5.576951773  | 4.03E-08 | 7.383399322 |
| SLC1A5             | 0.311661259  | 5.470026576 | 5.576789321  | 4.03E-08 | 7.382546842 |
| CCL7               | -0.416493309 | 0.91657669  | -5.576729215 | 4.03E-08 | 7.382231437 |
| FAM71E1            | 0.287585629  | 1.370821956 | 5.57645359   | 4.04E-08 | 7.380785141 |
| SCN4B              | -0.306699556 | 0.936011738 | -5.57584472  | 4.05E-08 | 7.377590421 |
| ANKRD13A           | -0.266433336 | 3.394389692 | -5.575343539 | 4.06E-08 | 7.374960968 |
| TMEM154            | -0.232435067 | 1.205969515 | -5.574207309 | 4.09E-08 | 7.3690005   |
| PDIA3              | 0.33380729   | 7.268580511 | 5.573892117  | 4.09E-08 | 7.367347247 |
| UBE2K              | 0.215007597  | 4.294185573 | 5.573279639  | 4.11E-08 | 7.364134893 |
| CTD-2555O16.2      | -0.20337279  | 1.096674046 | -5.572137532 | 4.13E-08 | 7.358145555 |

|            |              |             |              |          |             |
|------------|--------------|-------------|--------------|----------|-------------|
| TBX4       | -0.403083946 | 1.585435763 | -5.571767428 | 4.14E-08 | 7.356204921 |
| YWHAE      | 0.226611965  | 6.788973199 | 5.571460778  | 4.15E-08 | 7.354597091 |
| SLC25A33   | 0.237567064  | 1.826684905 | 5.570469444  | 4.17E-08 | 7.349399857 |
| RASAL2     | -0.244434173 | 1.672783252 | -5.569872485 | 4.18E-08 | 7.346270597 |
| SLC16A6    | -0.265551792 | 0.901973649 | -5.56788727  | 4.23E-08 | 7.335866209 |
| RGS2       | -0.534536918 | 4.445116752 | -5.567204921 | 4.24E-08 | 7.332290819 |
| DDX51      | 0.23133761   | 2.270974854 | 5.566194741  | 4.27E-08 | 7.32699836  |
| TMEM223    | 0.25323909   | 3.265676535 | 5.564626984  | 4.30E-08 | 7.318786359 |
| TAF4       | 0.207524026  | 1.914417085 | 5.561958844  | 4.36E-08 | 7.30481519  |
| AC246787.5 | -0.387660716 | 0.650637321 | -5.557803003 | 4.46E-08 | 7.283065756 |
| CXCL14     | -1.19952236  | 4.218432979 | -5.556629712 | 4.49E-08 | 7.276927978 |
| GUCY1A2    | -0.20978328  | 0.700423004 | -5.556281612 | 4.50E-08 | 7.2751072   |
| GSE1       | 0.338258032  | 3.608774386 | 5.555937212  | 4.51E-08 | 7.273305876 |
| ATP8B2     | -0.364419903 | 2.660735037 | -5.555897172 | 4.51E-08 | 7.273096459 |
| NFIX       | -0.5125544   | 3.457769478 | -5.55485295  | 4.54E-08 | 7.267635474 |
| C4B        | -0.471771668 | 1.714604541 | -5.554542043 | 4.54E-08 | 7.266009691 |
| DUS1L      | 0.291353175  | 4.248199046 | 5.554333663  | 4.55E-08 | 7.264920085 |
| MCCC2      | 0.251273593  | 3.791328941 | 5.553880691  | 4.56E-08 | 7.262551648 |
| IGKV1D-27  | -0.633774062 | 1.206918253 | -5.553488536 | 4.57E-08 | 7.260501337 |
| SOX7       | -0.318262069 | 1.147987366 | -5.553394692 | 4.57E-08 | 7.26001071  |
| IGLV3-30   | -0.211868434 | 0.290860217 | -5.551711363 | 4.61E-08 | 7.251211321 |
| FBXL3      | -0.221437528 | 2.938082634 | -5.547758881 | 4.71E-08 | 7.230559484 |
| GTF2IRD1   | 0.253279277  | 2.641014667 | 5.5464105    | 4.75E-08 | 7.223517121 |
| MRPS17     | 0.243908141  | 2.5901131   | 5.544810575  | 4.79E-08 | 7.215162952 |
| AKR7A3     | 0.779280925  | 1.743734483 | 5.544449833  | 4.80E-08 | 7.213279595 |
| ECI1       | 0.283744147  | 3.8128464   | 5.543551802  | 4.82E-08 | 7.208591636 |
| RIOK1      | 0.236012886  | 3.11280267  | 5.542910878  | 4.84E-08 | 7.205246254 |
| FAM86C2P   | 0.202865728  | 1.412532515 | 5.541072566  | 4.88E-08 | 7.195652856 |
| MRPS18B    | 0.250497611  | 5.306539883 | 5.539361978  | 4.93E-08 | 7.186728521 |
| DMXL2      | -0.254082518 | 1.825830275 | -5.537093245 | 4.99E-08 | 7.174896034 |
| GPD1       | -0.389213488 | 0.906123543 | -5.536377492 | 5.01E-08 | 7.171163944 |
| ENTPD8     | 0.467273207  | 1.164650267 | 5.533457794  | 5.09E-08 | 7.155944411 |
| TUBG1      | 0.314799272  | 4.250617631 | 5.530722119  | 5.16E-08 | 7.141690581 |

|                |              |             |              |          |             |
|----------------|--------------|-------------|--------------|----------|-------------|
| AP1M2          | 0.309519     | 5.107407476 | 5.529230326  | 5.21E-08 | 7.133920437 |
| XYLT1          | -0.328120729 | 1.3293829   | -5.528241068 | 5.23E-08 | 7.128768816 |
| MTRF1          | 0.333457964  | 3.135142316 | 5.527024361  | 5.27E-08 | 7.122433858 |
| SBK1           | 0.552804316  | 2.618044    | 5.525006311  | 5.32E-08 | 7.111929306 |
| PTRHD1         | 0.298278385  | 3.519837566 | 5.52363937   | 5.36E-08 | 7.1048159   |
| SNRPA1         | 0.246997848  | 3.196443902 | 5.523121835  | 5.38E-08 | 7.102123111 |
| MRPL37         | 0.215311326  | 4.734265626 | 5.522954476  | 5.38E-08 | 7.101252372 |
| SLC25A4        | 0.279233483  | 3.108387945 | 5.522645552  | 5.39E-08 | 7.09964516  |
| STX17-AS1      | 0.248206004  | 1.059375481 | 5.521118809  | 5.44E-08 | 7.091703267 |
| MBNL3          | -0.260335153 | 1.465764872 | -5.520709158 | 5.45E-08 | 7.089572652 |
| TMEM189        | 0.228248159  | 2.745971808 | 5.520180184  | 5.46E-08 | 7.086821637 |
| NQO1           | 0.810716682  | 5.69915494  | 5.518708137  | 5.51E-08 | 7.07916725  |
| PJA2           | -0.255241706 | 4.490497453 | -5.518037375 | 5.53E-08 | 7.075680006 |
| CAV2           | -0.522478302 | 3.359399621 | -5.516716159 | 5.57E-08 | 7.068812192 |
| SOD3           | -0.520809508 | 3.980362822 | -5.514760211 | 5.63E-08 | 7.058647644 |
| AP000695.6     | -0.237321628 | 0.656950081 | -5.514592569 | 5.63E-08 | 7.057776602 |
| LLGL2          | 0.379806725  | 4.202413431 | 5.513836222  | 5.65E-08 | 7.053847028 |
| SETD4          | 0.208503726  | 1.803015024 | 5.513233096  | 5.67E-08 | 7.050713847 |
| RIPK3          | -0.290989681 | 2.267244764 | -5.5124751   | 5.69E-08 | 7.046776565 |
| RP11-793H13.11 | 0.232460403  | 1.049123035 | 5.5116786    | 5.72E-08 | 7.04263979  |
| RNU6-137P      | 0.265666791  | 0.945084944 | 5.511383179  | 5.73E-08 | 7.041105603 |
| LNX1           | 0.257503081  | 1.502991885 | 5.511374748  | 5.73E-08 | 7.041061819 |
| DNASE1L3       | -0.314917738 | 0.679491713 | -5.510604642 | 5.75E-08 | 7.037062827 |
| NDUFS8         | 0.271443448  | 4.17182715  | 5.510565339  | 5.75E-08 | 7.036858749 |
| RP11-367G18.1  | -0.255137489 | 0.59635506  | -5.509439998 | 5.79E-08 | 7.031016028 |
| PCDHB7         | -0.220444586 | 0.712648203 | -5.509091444 | 5.80E-08 | 7.029206565 |
| LEMD2          | 0.205217934  | 3.102863962 | 5.508549357  | 5.82E-08 | 7.026392605 |
| NPC2           | -0.56126042  | 7.413801182 | -5.50641962  | 5.88E-08 | 7.015339576 |
| MMP3           | -0.413514921 | 0.722369641 | -5.505072204 | 5.92E-08 | 7.00834863  |
| SCGB1A1        | -1.638256036 | 4.620295314 | -5.504998467 | 5.93E-08 | 7.007966094 |
| NFE2L3         | -0.453185071 | 3.313813472 | -5.5045149   | 5.94E-08 | 7.005457549 |
| RP11-61L19.3   | 0.206694573  | 1.103208729 | 5.504012116  | 5.96E-08 | 7.002849524 |
| RP11-366M4.11  | -0.217786072 | 0.587164647 | -5.503641536 | 5.97E-08 | 7.000927395 |

|               |              |             |              |          |             |
|---------------|--------------|-------------|--------------|----------|-------------|
| TRAPPC9       | 0.269837623  | 2.861998253 | 5.502492196  | 6.01E-08 | 6.994966718 |
| SOCS3         | -0.467223752 | 5.631272389 | -5.500948241 | 6.06E-08 | 6.98696123  |
| TMEM97        | 0.39849027   | 3.878996932 | 5.499643593  | 6.10E-08 | 6.980198116 |
| HERC6         | -0.362923564 | 2.366462933 | -5.498172155 | 6.15E-08 | 6.972572084 |
| PICALM        | -0.2135269   | 5.107630921 | -5.497274693 | 6.18E-08 | 6.96792169  |
| COPZ1         | 0.200016875  | 5.613748977 | 5.497065236  | 6.18E-08 | 6.966836438 |
| COX6A1        | 0.309917592  | 6.213678942 | 5.493175792  | 6.31E-08 | 6.946690879 |
| LUZP1         | -0.255126149 | 2.284555707 | -5.492939873 | 6.32E-08 | 6.945469331 |
| IGLV3-32      | -0.223785394 | 0.347825604 | -5.492614649 | 6.33E-08 | 6.943785454 |
| RP3-407E4.4   | 0.714620975  | 2.006865887 | 5.492591958  | 6.33E-08 | 6.943667973 |
| MIR568        | -0.431159782 | 2.908735962 | -5.490092221 | 6.42E-08 | 6.930728352 |
| ATP1B1        | 0.532453531  | 7.425998343 | 5.48969448   | 6.43E-08 | 6.928669964 |
| ITGB3         | -0.395904099 | 0.990627365 | -5.489671128 | 6.43E-08 | 6.928549118 |
| IL6ST         | -0.350090547 | 4.510049577 | -5.487736335 | 6.50E-08 | 6.918538128 |
| RAP2C         | -0.221677772 | 3.500307505 | -5.487505075 | 6.51E-08 | 6.917341753 |
| LYN           | -0.316110945 | 4.254996919 | -5.485290038 | 6.59E-08 | 6.905884991 |
| KLF13         | -0.324689664 | 3.37683768  | -5.481418173 | 6.72E-08 | 6.885868508 |
| GID8          | 0.234480299  | 4.298024153 | 5.481068522  | 6.74E-08 | 6.884061526 |
| RP4-647J21.1  | -0.558341752 | 1.430073067 | -5.480150556 | 6.77E-08 | 6.879317997 |
| RPN2          | 0.256884961  | 7.368191555 | 5.477964108  | 6.85E-08 | 6.868022502 |
| AC244250.3    | -0.553108628 | 1.069171931 | -5.477470897 | 6.87E-08 | 6.865475061 |
| LYPD5         | -0.296791488 | 0.811099129 | -5.477301008 | 6.87E-08 | 6.864597628 |
| FNDC1         | -0.613625704 | 2.209901697 | -5.47665804  | 6.90E-08 | 6.861277078 |
| E2F5          | 0.284381111  | 1.853849834 | 5.476304535  | 6.91E-08 | 6.859451583 |
| GADD45B       | -0.427747846 | 4.675662506 | -5.475806465 | 6.93E-08 | 6.856879739 |
| JDP2          | -0.257131784 | 2.452814458 | -5.475098146 | 6.95E-08 | 6.853222593 |
| B4GALNT4      | 0.61197794   | 1.559028381 | 5.475055755  | 6.95E-08 | 6.853003738 |
| RP11-703I16.1 | 0.400245246  | 1.974791289 | 5.473344725  | 7.02E-08 | 6.844171262 |
| CMTM7         | -0.325941471 | 3.078024203 | -5.473243037 | 7.02E-08 | 6.84364642  |
| DHRS11        | 0.240891648  | 1.64680461  | 5.471522329  | 7.09E-08 | 6.834766596 |
| CHSY1         | -0.296024863 | 3.200500933 | -5.470725735 | 7.12E-08 | 6.830656563 |
| KIAA1598      | 0.301537824  | 2.992603449 | 5.469307899  | 7.17E-08 | 6.823342536 |
| SLC35B2       | 0.250900842  | 5.353761296 | 5.467166649  | 7.25E-08 | 6.812299896 |



|            |              |             |              |          |             |
|------------|--------------|-------------|--------------|----------|-------------|
| C14orf79   | 0.24092487   | 1.995144078 | 5.466062521  | 7.30E-08 | 6.806607295 |
| IGLV3-24   | -0.220808607 | 0.287014558 | -5.463062967 | 7.41E-08 | 6.791147515 |
| ZNF664     | 0.277089785  | 4.686740747 | 5.46136229   | 7.48E-08 | 6.782385522 |
| TNFAIP8L1  | -0.266812492 | 2.029534491 | -5.460593294 | 7.51E-08 | 6.7784244   |
| HCN3       | 0.29265555   | 1.37796358  | 5.459640221  | 7.55E-08 | 6.773515781 |
| IGHD4-17   | -0.506177161 | 0.707300269 | -5.459471288 | 7.56E-08 | 6.772645802 |
| MMP11      | -0.810445825 | 3.275133022 | -5.458168771 | 7.61E-08 | 6.765938847 |
| GSTK1      | -0.294066404 | 4.662926714 | -5.457906352 | 7.62E-08 | 6.764587764 |
| TMEM256    | 0.359763972  | 4.973351641 | 5.456855207  | 7.66E-08 | 6.759176446 |
| TMUB1      | 0.309801754  | 4.528694249 | 5.455930147  | 7.70E-08 | 6.754414982 |
| GNG12      | -0.375988432 | 4.503380549 | -5.455148698 | 7.73E-08 | 6.750393271 |
| MEX3A      | 0.536204924  | 2.22482565  | 5.454377145  | 7.76E-08 | 6.746422989 |
| CCDC8      | -0.397783988 | 1.703818488 | -5.45422274  | 7.77E-08 | 6.745628507 |
| CCDC90B    | -0.268552092 | 2.375447703 | -5.454071454 | 7.78E-08 | 6.744850091 |
| TRIM38     | -0.207803789 | 2.746397231 | -5.451616371 | 7.88E-08 | 6.732220591 |
| MAP7       | 0.311931288  | 3.205440239 | 5.450967387  | 7.90E-08 | 6.72888291  |
| DOLPP1     | 0.215029797  | 3.532284139 | 5.45068294   | 7.92E-08 | 6.727420133 |
| RND3       | -0.495129536 | 3.14456952  | -5.449156631 | 7.98E-08 | 6.719572186 |
| PPP1R14BP3 | 0.366179035  | 4.996469403 | 5.446968988  | 8.07E-08 | 6.708327205 |
| PARVA      | -0.242436737 | 3.233657059 | -5.446629199 | 8.09E-08 | 6.706580973 |
| IGHD6-6    | -0.398961704 | 0.493277715 | -5.446025745 | 8.11E-08 | 6.703479961 |
| PPARGC1A   | 0.372019176  | 0.697827712 | 5.445069424  | 8.16E-08 | 6.69856627  |
| AP006285.2 | 0.236729059  | 0.647157249 | 5.443535945  | 8.22E-08 | 6.690688667 |
| CASC9      | 0.63266653   | 1.172699766 | 5.441174881  | 8.33E-08 | 6.67856354  |
| HERC1      | -0.237903021 | 2.002013103 | -5.439938592 | 8.38E-08 | 6.672216503 |
| ZNHIT2     | 0.283224644  | 3.384086296 | 5.439031636  | 8.42E-08 | 6.667561058 |
| PSMG3      | 0.33447208   | 4.397299651 | 5.438884487  | 8.43E-08 | 6.666805801 |
| TBRG4      | 0.259873324  | 3.580388003 | 5.438580854  | 8.44E-08 | 6.665247431 |
| SRRT       | 0.234476772  | 4.516420709 | 5.437254012  | 8.50E-08 | 6.658438433 |
| PRKRIP1    | 0.23808589   | 3.180508781 | 5.435781955  | 8.57E-08 | 6.650885953 |
| MCM7       | 0.38290412   | 4.725237092 | 5.43560743   | 8.57E-08 | 6.649990662 |
| PRPF19     | 0.207100934  | 5.481623106 | 5.432765824  | 8.70E-08 | 6.635417176 |
| TONSL      | 0.337152071  | 2.004874543 | 5.432487362  | 8.72E-08 | 6.633989417 |

|               |              |             |              |          |             |
|---------------|--------------|-------------|--------------|----------|-------------|
| DGUOK-AS1     | 0.24615132   | 1.328955716 | 5.430591063  | 8.81E-08 | 6.624268249 |
| SNORA16       | -0.243729012 | 0.609359832 | -5.429806085 | 8.84E-08 | 6.620245029 |
| SFTPC         | -1.685512793 | 5.146181058 | -5.429699351 | 8.85E-08 | 6.619698027 |
| MRS2          | 0.241660921  | 3.2180375   | 5.429672298  | 8.85E-08 | 6.619559383 |
| TRIT1         | 0.251106241  | 3.250632802 | 5.426709577  | 8.99E-08 | 6.60437963  |
| SLC45A4       | 0.369070923  | 2.558636784 | 5.425218012  | 9.06E-08 | 6.596740256 |
| HGD           | 0.808538206  | 2.09157809  | 5.424806259  | 9.08E-08 | 6.594631701 |
| RP11-499O7.7  | 0.550486581  | 0.854815318 | 5.424202862  | 9.11E-08 | 6.591542009 |
| TMEM44-AS1    | 0.314173939  | 2.210248003 | 5.424190017  | 9.11E-08 | 6.591476238 |
| CADM4         | 0.448661249  | 3.443056638 | 5.423134078  | 9.16E-08 | 6.586070055 |
| PPP1R35       | 0.343044826  | 3.96650571  | 5.422194568  | 9.21E-08 | 6.581260743 |
| ATP6V1H       | 0.202679382  | 3.567244235 | 5.421436333  | 9.24E-08 | 6.577379913 |
| AC092066.1    | 0.298931464  | 2.444909584 | 5.421172306  | 9.25E-08 | 6.576028672 |
| RP11-279F6.1  | 0.698354923  | 1.247690243 | 5.420163359  | 9.30E-08 | 6.57086561  |
| AKAP1         | 0.278802281  | 4.206276802 | 5.419478928  | 9.34E-08 | 6.567363673 |
| C8orf88       | -0.248003627 | 0.63344382  | -5.417622273 | 9.43E-08 | 6.557865946 |
| TGFB2         | -0.467580348 | 1.623327529 | -5.417170817 | 9.45E-08 | 6.555556957 |
| WNK2          | 0.33820526   | 0.93530102  | 5.416476753  | 9.49E-08 | 6.552007474 |
| HIP1R         | 0.330492358  | 3.242017499 | 5.416073296  | 9.51E-08 | 6.549944356 |
| RP11-61J19.5  | 0.235064731  | 0.89790787  | 5.415641555  | 9.53E-08 | 6.547736759 |
| AC244250.2    | -1.050106892 | 3.65440518  | -5.415612496 | 9.53E-08 | 6.547588179 |
| GAR1          | 0.210730721  | 3.361156147 | 5.413390702  | 9.64E-08 | 6.536230122 |
| C3orf33       | 0.23027374   | 2.131194362 | 5.412770489  | 9.67E-08 | 6.533060269 |
| SMAD7         | -0.284992025 | 3.118858658 | -5.4120922   | 9.71E-08 | 6.529593958 |
| SCPEP1        | -0.438104237 | 5.154638967 | -5.409489043 | 9.84E-08 | 6.516294437 |
| TRIM11        | 0.214180979  | 2.391966433 | 5.408825007  | 9.88E-08 | 6.512902788 |
| NOP2          | 0.281616664  | 3.396963131 | 5.408124789  | 9.91E-08 | 6.509326741 |
| BACH1         | -0.26265439  | 2.907514732 | -5.406903494 | 9.98E-08 | 6.503090503 |
| GPAA1         | 0.295187793  | 5.389692711 | 5.406557649  | 1.00E-07 | 6.50132476  |
| PARD3-AS1     | 0.241824326  | 0.591260919 | 5.406461683  | 1.00E-07 | 6.500834814 |
| ITGB5         | -0.324283824 | 4.58918711  | -5.405951396 | 1.00E-07 | 6.498229723 |
| CTD-2531D15.4 | -0.212566603 | 0.263348526 | -5.405898006 | 1.00E-07 | 6.497957171 |
| C1QBP         | 0.312694604  | 4.906154038 | 5.405818358  | 1.00E-07 | 6.497550581 |

|               |              |             |              |          |             |
|---------------|--------------|-------------|--------------|----------|-------------|
| NARS2         | 0.246827364  | 2.968775179 | 5.405243747  | 1.01E-07 | 6.494617433 |
| TBCEL         | -0.213299699 | 2.069810864 | -5.403941769 | 1.01E-07 | 6.4879724   |
| NUP88         | 0.213489923  | 3.091589322 | 5.403594732  | 1.02E-07 | 6.486201432 |
| ANPEP         | -0.673984232 | 2.826744563 | -5.403534337 | 1.02E-07 | 6.485893242 |
| UBE2Q1        | 0.201690768  | 4.862638436 | 5.402520166  | 1.02E-07 | 6.480718454 |
| NUTF2         | 0.225103831  | 4.584575484 | 5.402180615  | 1.02E-07 | 6.478986093 |
| IL10RB        | -0.252864563 | 4.374662874 | -5.402135687 | 1.02E-07 | 6.478756884 |
| RIPPLY3       | 0.360238327  | 0.744662247 | 5.401924813  | 1.02E-07 | 6.477681079 |
| PHKA1         | 0.279963999  | 2.276487211 | 5.401055616  | 1.03E-07 | 6.473247137 |
| RP11-396C23.2 | 0.224259252  | 0.891227264 | 5.400325461  | 1.03E-07 | 6.469522964 |
| RECQL4        | 0.44791996   | 2.566337583 | 5.399733009  | 1.04E-07 | 6.466501482 |
| NELFE         | 0.234860411  | 4.871581148 | 5.398289407  | 1.04E-07 | 6.459140395 |
| KRTAP5-1      | 0.233316329  | 0.635314476 | 5.398067429  | 1.05E-07 | 6.458008656 |
| CTSE          | -1.191144311 | 5.058892658 | -5.396871447 | 1.05E-07 | 6.451911764 |
| FGL1          | 1.057363001  | 1.862419532 | 5.396866306  | 1.05E-07 | 6.451885558 |
| ARHGAP4       | -0.4213109   | 3.088979543 | -5.396643763 | 1.05E-07 | 6.450751207 |
| PITX2         | 0.468572808  | 0.812257837 | 5.395132969  | 1.06E-07 | 6.443051462 |
| PLXND1        | -0.40028234  | 4.319857296 | -5.394327886 | 1.07E-07 | 6.438949146 |
| MN1           | -0.286539122 | 0.986072367 | -5.394249976 | 1.07E-07 | 6.438552186 |
| TMEM241       | 0.242542796  | 2.18221102  | 5.393970908  | 1.07E-07 | 6.437130335 |
| AMBP          | 0.696325897  | 1.184368775 | 5.392850207  | 1.07E-07 | 6.431421022 |
| CKMT1A        | 0.309721588  | 0.747091604 | 5.392732833  | 1.08E-07 | 6.430823137 |
| OSGIN1        | 0.606216738  | 2.433679206 | 5.391107625  | 1.08E-07 | 6.422545697 |
| CLC           | -0.350308241 | 0.376201543 | -5.390187709 | 1.09E-07 | 6.417861405 |
| CYTH3         | -0.405245692 | 3.248241273 | -5.390012741 | 1.09E-07 | 6.416970529 |
| NOLC1         | 0.254368453  | 4.905869458 | 5.389100681  | 1.10E-07 | 6.412327077 |
| PTDSS2        | 0.218933133  | 2.455983    | 5.387992436  | 1.10E-07 | 6.406685752 |
| NHLRC4        | -0.283513515 | 0.798684553 | -5.387952855 | 1.10E-07 | 6.40648429  |
| MYBBP1A       | 0.266641928  | 3.449239994 | 5.387429282  | 1.11E-07 | 6.40381951  |
| RAB40C        | 0.339642464  | 3.794546571 | 5.38712705   | 1.11E-07 | 6.402281377 |
| INADL         | 0.263119789  | 2.806706106 | 5.38704254   | 1.11E-07 | 6.401851297 |
| IGHV1-68      | -0.263853473 | 0.44463592  | -5.386525096 | 1.11E-07 | 6.399218104 |
| TYSND1        | 0.225074272  | 2.761626117 | 5.386337322  | 1.11E-07 | 6.398262607 |

|               |              |             |              |          |             |
|---------------|--------------|-------------|--------------|----------|-------------|
| TMEM100       | -0.514944228 | 1.414251376 | -5.385029663 | 1.12E-07 | 6.391609347 |
| EAF2          | -0.261630981 | 1.670221933 | -5.384471455 | 1.12E-07 | 6.38876967  |
| CHST7         | -0.217373935 | 1.406337237 | -5.384330646 | 1.12E-07 | 6.388053398 |
| SH3D19        | -0.241263556 | 3.261916702 | -5.383441273 | 1.13E-07 | 6.383529682 |
| COPS5         | 0.233761571  | 3.073514239 | 5.382745179  | 1.13E-07 | 6.379989531 |
| ENDOG         | 0.253245655  | 2.239078387 | 5.380301392  | 1.15E-07 | 6.367564285 |
| HSPB7         | -0.290560637 | 1.047033839 | -5.379603614 | 1.15E-07 | 6.364017407 |
| NDUFA8        | 0.218706081  | 5.425346514 | 5.378839177  | 1.16E-07 | 6.360132171 |
| NRSN2-AS1     | 0.259423562  | 2.022913902 | 5.375557071  | 1.18E-07 | 6.343456489 |
| RRNAD1        | 0.244647569  | 3.641962003 | 5.375516857  | 1.18E-07 | 6.34325223  |
| KIAA1522      | 0.312216239  | 5.200547219 | 5.375186929  | 1.18E-07 | 6.341576449 |
| JUP           | 0.36427819   | 6.303501938 | 5.37389098   | 1.19E-07 | 6.334994907 |
| ST3GAL6       | -0.264812065 | 1.256152951 | -5.37362263  | 1.19E-07 | 6.333632255 |
| CAB39         | -0.223750445 | 4.5004006   | -5.373460754 | 1.19E-07 | 6.332810295 |
| CDC42EP3      | -0.400847091 | 3.066331352 | -5.373393306 | 1.19E-07 | 6.332467816 |
| FBXO46        | 0.246278775  | 2.866775656 | 5.371426637  | 1.20E-07 | 6.322483513 |
| ADSSL1        | 0.403501444  | 1.778685286 | 5.371373098  | 1.20E-07 | 6.322211755 |
| CCL24         | -0.454437203 | 1.230565306 | -5.371042048 | 1.20E-07 | 6.320531425 |
| RP11-1C8.7    | 0.336715247  | 0.373091753 | 5.370325685  | 1.21E-07 | 6.316895665 |
| CCL26         | -0.305130698 | 0.705115913 | -5.370075782 | 1.21E-07 | 6.315627431 |
| CACFD1        | 0.302820826  | 3.787703375 | 5.366577001  | 1.23E-07 | 6.297876978 |
| ZNF3          | 0.20956743   | 2.898789074 | 5.366032354  | 1.24E-07 | 6.295114731 |
| RP11-180M15.7 | -0.231912132 | 1.085312334 | -5.36546703  | 1.24E-07 | 6.292247885 |
| GEMIN8P4      | 0.24361044   | 1.144609259 | 5.364269531  | 1.25E-07 | 6.286176067 |
| IGLL1         | -0.257586479 | 0.404107115 | -5.36354727  | 1.25E-07 | 6.282514487 |
| KDELC1        | -0.296700834 | 1.670234213 | -5.363124611 | 1.26E-07 | 6.280371972 |
| RGS5          | -0.440449137 | 3.626217325 | -5.362691295 | 1.26E-07 | 6.278175596 |
| PCDH7         | -0.471893237 | 1.403692521 | -5.36169556  | 1.27E-07 | 6.273129047 |
| ILK           | -0.213288362 | 2.089020067 | -5.361530596 | 1.27E-07 | 6.272293062 |
| MNAT1         | 0.205961281  | 2.42109158  | 5.360411318  | 1.27E-07 | 6.266621529 |
| CTSL          | -0.442443017 | 5.95891289  | -5.35910328  | 1.28E-07 | 6.259994858 |
| IGKV2OR2-1    | -0.357630772 | 0.5961177   | -5.359021615 | 1.28E-07 | 6.259581183 |
| GGCT          | 0.342335135  | 5.006140613 | 5.357627798  | 1.29E-07 | 6.252521624 |

|               |              |             |              |          |             |
|---------------|--------------|-------------|--------------|----------|-------------|
| IRS2          | 0.522676996  | 2.732252958 | 5.356848277  | 1.30E-07 | 6.248574132 |
| DCAF16        | 0.239365559  | 3.119445298 | 5.35109064   | 1.34E-07 | 6.219433337 |
| RARB          | -0.290095434 | 1.503376824 | -5.350498646 | 1.34E-07 | 6.216438689 |
| FENDRR        | -0.259209088 | 0.578070082 | -5.350241125 | 1.34E-07 | 6.215136094 |
| DLG4          | -0.253221584 | 1.587349092 | -5.349615138 | 1.35E-07 | 6.211969951 |
| WASH6P        | 0.295728711  | 1.337947027 | 5.348309726  | 1.36E-07 | 6.205368449 |
| COMMD4        | 0.206283456  | 3.058001312 | 5.344635749  | 1.38E-07 | 6.186796756 |
| MCF2L         | 0.318035072  | 1.293798492 | 5.343987024  | 1.39E-07 | 6.183518679 |
| RP5-967N21.11 | 0.288972341  | 1.320127728 | 5.341323298  | 1.41E-07 | 6.170062295 |
| CACNA2D1      | -0.3052462   | 0.994768197 | -5.340396845 | 1.41E-07 | 6.165383524 |
| LAMC2         | -0.713683893 | 4.804608861 | -5.338210252 | 1.43E-07 | 6.154343659 |
| SLC39A4       | 0.432931671  | 3.347131964 | 5.337341398  | 1.44E-07 | 6.149958029 |
| KIF21A        | 0.299314841  | 2.006778325 | 5.336201028  | 1.45E-07 | 6.144202861 |
| DVL1          | 0.32950477   | 4.582307151 | 5.333679302  | 1.46E-07 | 6.131480221 |
| RP3-449M8.6   | -0.259215483 | 0.70513672  | -5.333105202 | 1.47E-07 | 6.128584515 |
| APEX1         | 0.244813216  | 6.285867305 | 5.331588425  | 1.48E-07 | 6.120935365 |
| RP11-284F21.9 | 0.502954603  | 0.890425157 | 5.329443341  | 1.50E-07 | 6.110120967 |
| CCS           | 0.24636127   | 3.874385443 | 5.328987959  | 1.50E-07 | 6.107825665 |
| DGAT1         | 0.315251636  | 3.884238039 | 5.325465134  | 1.53E-07 | 6.09007518  |
| TSTA3         | 0.341036053  | 4.934318342 | 5.325153845  | 1.53E-07 | 6.088507188 |
| RAB2A         | 0.222364959  | 4.962756994 | 5.324680409  | 1.53E-07 | 6.086122604 |
| CLIC5         | -0.539721268 | 1.78553885  | -5.321597515 | 1.56E-07 | 6.070599433 |
| RP11-26F2.1   | 0.223817305  | 0.360826722 | 5.321337423  | 1.56E-07 | 6.069290168 |
| SMPDL3A       | -0.465933631 | 3.441312812 | -5.317694179 | 1.59E-07 | 6.050956629 |
| TRAM2         | -0.291506015 | 3.045953709 | -5.317608886 | 1.59E-07 | 6.050527547 |
| PPARG         | -0.458504111 | 2.101904923 | -5.316503925 | 1.60E-07 | 6.044969455 |
| ACTR2         | -0.202553868 | 6.224788955 | -5.314963313 | 1.61E-07 | 6.0372217   |
| IGKV2-18      | -0.276115223 | 0.410441691 | -5.314727704 | 1.62E-07 | 6.036036998 |
| NRSN2         | 0.296395227  | 3.949166593 | 5.312936408  | 1.63E-07 | 6.027031425 |
| RNF13         | -0.222993956 | 4.28368364  | -5.31085416  | 1.65E-07 | 6.016566524 |
| ZMAT3         | -0.230854457 | 2.056668797 | -5.309712578 | 1.66E-07 | 6.010830743 |
| SPTBN2        | 0.377666127  | 2.701789327 | 5.307816046  | 1.68E-07 | 6.001304221 |
| ABCG2         | -0.228524337 | 0.910326973 | -5.306841508 | 1.68E-07 | 5.996410175 |

|               |              |             |              |          |             |
|---------------|--------------|-------------|--------------|----------|-------------|
| PPAP2C        | 0.404428604  | 3.63501861  | 5.306526139  | 1.69E-07 | 5.994826589 |
| IGLV5-37      | -0.732388806 | 1.569925818 | -5.306341123 | 1.69E-07 | 5.993897595 |
| C14orf1       | 0.239055305  | 4.472882148 | 5.305890846  | 1.69E-07 | 5.991636803 |
| TRPS1         | -0.274947816 | 1.249589998 | -5.304830483 | 1.70E-07 | 5.986313513 |
| HIBCH         | 0.205727805  | 2.143544911 | 5.301080562  | 1.74E-07 | 5.967495574 |
| MIER1         | -0.205980668 | 2.788912021 | -5.300955038 | 1.74E-07 | 5.966865874 |
| GSDMA         | -0.241093942 | 0.653310922 | -5.300881512 | 1.74E-07 | 5.966497029 |
| C19orf66      | -0.244742969 | 2.743918572 | -5.300624354 | 1.74E-07 | 5.965207035 |
| ADRBK2        | -0.313334774 | 2.145018722 | -5.300408493 | 1.74E-07 | 5.964124242 |
| OLMALINC      | 0.302813945  | 2.096623284 | 5.299476431  | 1.75E-07 | 5.959449319 |
| CTD-2139B15.5 | 0.551861741  | 0.710568058 | 5.299173634  | 1.75E-07 | 5.957930744 |
| PRDM8         | -0.262470589 | 0.883113822 | -5.298421812 | 1.76E-07 | 5.954160575 |
| ZNF513        | 0.263663513  | 3.201125407 | 5.298083386  | 1.76E-07 | 5.952463624 |
| OR7E38P       | 0.370370278  | 2.470699042 | 5.296294901  | 1.78E-07 | 5.943497321 |
| RP11-400K9.4  | -0.271159532 | 0.646344186 | -5.295057247 | 1.79E-07 | 5.93729411  |
| WDR5          | 0.212073185  | 3.73375783  | 5.295035865  | 1.79E-07 | 5.937186956 |
| PHLPP1        | 0.247067005  | 1.652798871 | 5.29451151   | 1.80E-07 | 5.934559247 |
| TIMELESS      | 0.351686056  | 3.080790936 | 5.293755896  | 1.80E-07 | 5.930773042 |
| CTD-3065J16.9 | 0.21728649   | 0.998324595 | 5.29347108   | 1.80E-07 | 5.92934602  |
| AP3S1         | -0.202681584 | 3.965992226 | -5.293221867 | 1.81E-07 | 5.928097438 |
| SNX18         | -0.291983662 | 3.141712334 | -5.292773469 | 1.81E-07 | 5.925851049 |
| PRDX6         | 0.236481132  | 6.710944477 | 5.291842167  | 1.82E-07 | 5.921185946 |
| AFMID         | 0.255848879  | 3.107701139 | 5.290029401  | 1.84E-07 | 5.912107496 |
| KRT18         | 0.38704654   | 7.754976288 | 5.288967808  | 1.85E-07 | 5.90679226  |
| RPS6KA1       | -0.23767862  | 4.037876363 | -5.288708513 | 1.85E-07 | 5.905494154 |
| HIVEP2        | -0.238222236 | 2.390036212 | -5.288700623 | 1.85E-07 | 5.905454654 |
| S100A8        | -0.810510548 | 3.882928315 | -5.288257987 | 1.85E-07 | 5.903238825 |
| TOMM40        | 0.285771479  | 4.169653041 | 5.286748394  | 1.87E-07 | 5.895683063 |
| ATP6V1C2      | 0.508709833  | 1.588440093 | 5.286725517  | 1.87E-07 | 5.895568575 |
| INPPL1        | 0.30573672   | 4.617279951 | 5.286011214  | 1.88E-07 | 5.891994057 |
| CELSR3-AS1    | 0.209461838  | 0.913727685 | 5.284546099  | 1.89E-07 | 5.884663675 |
| VAMP1         | -0.29603359  | 1.715053732 | -5.281322108 | 1.92E-07 | 5.86853953  |
| COL5A3        | -0.393484955 | 1.770430388 | -5.280064562 | 1.93E-07 | 5.862252548 |

|             |              |             |              |          |             |
|-------------|--------------|-------------|--------------|----------|-------------|
| MAP4        | -0.223254867 | 4.03464543  | -5.277082126 | 1.96E-07 | 5.847347491 |
| RP4-533D7.5 | 0.237103846  | 0.573770774 | 5.276756936  | 1.97E-07 | 5.845722774 |
| FAM83G      | 0.277715843  | 2.131398274 | 5.273871479  | 2.00E-07 | 5.831310337 |
| MSI2        | 0.238460665  | 2.227068523 | 5.273198678  | 2.00E-07 | 5.827950807 |
| THEM5       | 0.478063303  | 2.670324009 | 5.269678549  | 2.04E-07 | 5.810379824 |
| IGHD5-12    | -0.297617565 | 0.33224088  | -5.269251548 | 2.05E-07 | 5.808249132 |
| SRP9        | 0.243486312  | 6.60992336  | 5.268684401  | 2.05E-07 | 5.805419361 |
| STAT2       | -0.262805018 | 4.589621805 | -5.261888653 | 2.12E-07 | 5.771533273 |
| AL928761.1  | -0.596624532 | 1.808711942 | -5.261367757 | 2.13E-07 | 5.768937507 |
| IL13RA1     | -0.267545643 | 5.314623827 | -5.258515736 | 2.16E-07 | 5.754729196 |
| BCAT1       | -0.579940387 | 2.636089434 | -5.254689471 | 2.20E-07 | 5.735678181 |
| CHCHD1      | 0.22703651   | 4.467774637 | 5.254232459  | 2.21E-07 | 5.733403543 |
| IGKV2-29    | -0.894735659 | 1.713994308 | -5.25330423  | 2.22E-07 | 5.728784106 |
| ACY1        | 0.20429657   | 1.335844065 | 5.252831236  | 2.23E-07 | 5.726430484 |
| TTC6        | 0.224783402  | 0.537918206 | 5.251326368  | 2.24E-07 | 5.718943494 |
| RNF213      | -0.3655241   | 3.742388568 | -5.250338086 | 2.25E-07 | 5.71402766  |
| RAB27A      | -0.324874372 | 3.702179855 | -5.249631046 | 2.26E-07 | 5.710511263 |
| NOXA1       | 0.467330028  | 3.075748959 | 5.249462033  | 2.26E-07 | 5.709670758 |
| FAM229B     | -0.322922395 | 1.741615692 | -5.247293894 | 2.29E-07 | 5.698890677 |
| RPS20P14    | 0.32201062   | 1.991862755 | 5.246924278  | 2.29E-07 | 5.697053327 |
| COLGALT1    | -0.284197815 | 4.671183083 | -5.246900127 | 2.29E-07 | 5.696933279 |
| BAIAP2L1    | 0.314566969  | 4.267316668 | 5.245754344  | 2.31E-07 | 5.691238389 |
| MRPL15      | 0.320858906  | 5.392918829 | 5.245462588  | 2.31E-07 | 5.689788451 |
| PAPSS1      | -0.201732225 | 4.210352965 | -5.24522718  | 2.31E-07 | 5.688618601 |
| IGHV3-75    | -0.310029823 | 0.601024582 | -5.243538193 | 2.33E-07 | 5.680226602 |
| MEGF6       | -0.45550933  | 2.636434892 | -5.241914483 | 2.35E-07 | 5.672161229 |
| INTS8       | 0.23022886   | 2.746098312 | 5.24157481   | 2.36E-07 | 5.67047427  |
| SYCP2L      | 0.205393872  | 0.359688901 | 5.240918741  | 2.37E-07 | 5.667216235 |
| BTBD6       | 0.250593711  | 4.808894554 | 5.239210526  | 2.39E-07 | 5.658734956 |
| ACN9        | 0.286652816  | 2.902978942 | 5.236306362  | 2.42E-07 | 5.64432148  |
| COX5B       | 0.294369937  | 5.906419035 | 5.236054339  | 2.43E-07 | 5.643071016 |
| IGLL3P      | -0.259819077 | 0.423331288 | -5.233657919 | 2.46E-07 | 5.63118339  |
| AC098614.2  | -0.276792488 | 1.560046892 | -5.232630584 | 2.47E-07 | 5.626088712 |

|              |              |             |              |          |             |
|--------------|--------------|-------------|--------------|----------|-------------|
| FAM126A      | -0.337699363 | 1.825551613 | -5.229593866 | 2.51E-07 | 5.611034482 |
| USMG5        | 0.2676919    | 5.782330497 | 5.229479811  | 2.51E-07 | 5.610469221 |
| FHL5         | -0.27258264  | 0.909341691 | -5.22880347  | 2.52E-07 | 5.607117459 |
| MIEN1        | 0.316149505  | 4.33585804  | 5.228739191  | 2.52E-07 | 5.606798929 |
| GPR110       | -0.737364227 | 2.109214124 | -5.228726252 | 2.52E-07 | 5.606734809 |
| SOD1         | 0.259929316  | 6.295060092 | 5.228470844  | 2.52E-07 | 5.605469195 |
| SCNN1A       | 0.553964434  | 5.593277213 | 5.225866762  | 2.56E-07 | 5.592568433 |
| TMEM43       | -0.26192646  | 5.140031274 | -5.225236996 | 2.56E-07 | 5.589449405 |
| B3GNT2       | -0.250821438 | 3.821938094 | -5.224930288 | 2.57E-07 | 5.587930498 |
| SKI          | -0.270522345 | 4.121412671 | -5.224689892 | 2.57E-07 | 5.586740047 |
| ANK2         | -0.228268316 | 0.651325106 | -5.222936585 | 2.60E-07 | 5.57805906  |
| TNK1         | 0.212995468  | 2.186253511 | 5.221102186  | 2.62E-07 | 5.568979372 |
| INHA         | 0.764072775  | 1.164772463 | 5.217115465  | 2.67E-07 | 5.549256218 |
| RAE1         | 0.218112462  | 2.801304752 | 5.216484739  | 2.68E-07 | 5.546137119 |
| CHKA         | 0.351249104  | 3.251949306 | 5.21572994   | 2.69E-07 | 5.542404892 |
| MTX1         | 0.213046053  | 2.913670487 | 5.214595294  | 2.71E-07 | 5.536795362 |
| DDX26B       | -0.223520818 | 1.259916501 | -5.214143    | 2.71E-07 | 5.534559586 |
| MEN1         | 0.225973867  | 3.581122652 | 5.214075854  | 2.72E-07 | 5.534227688 |
| GDF5         | -0.26148052  | 0.491459283 | -5.21392454  | 2.72E-07 | 5.533479762 |
| NOP14        | 0.200055982  | 3.88805777  | 5.213798462  | 2.72E-07 | 5.532856591 |
| RAB25        | 0.387902207  | 6.196045292 | 5.213426059  | 2.72E-07 | 5.53101597  |
| CRIM1        | -0.370968786 | 3.504191485 | -5.213214349 | 2.73E-07 | 5.529969637 |
| ECM1         | -0.658388336 | 3.816304512 | -5.212141521 | 2.74E-07 | 5.52466799  |
| TAF1A-AS1    | 0.203363725  | 1.018417951 | 5.211136683  | 2.76E-07 | 5.519703217 |
| SH3PXD2A     | -0.298128946 | 3.498572661 | -5.210957535 | 2.76E-07 | 5.518818164 |
| NFKBID       | -0.266594342 | 1.555760553 | -5.210207172 | 2.77E-07 | 5.515111392 |
| BIRC7        | -0.355349934 | 1.000797234 | -5.209859735 | 2.77E-07 | 5.513395227 |
| PARP14       | -0.312057803 | 4.049530893 | -5.209527457 | 2.78E-07 | 5.511754036 |
| STX4         | -0.212827435 | 3.722467933 | -5.208225852 | 2.80E-07 | 5.505326033 |
| RP11-103B5.4 | 0.309097255  | 0.666367794 | 5.207768362  | 2.80E-07 | 5.503067048 |
| COL4A3BP     | -0.226304797 | 2.664752843 | -5.207519389 | 2.81E-07 | 5.501837752 |
| TATDN1       | 0.232243104  | 2.244181562 | 5.207169996  | 2.81E-07 | 5.500112722 |
| LGSN         | 0.603369899  | 1.693741411 | 5.206070965  | 2.83E-07 | 5.494687243 |



|               |              |             |              |          |             |
|---------------|--------------|-------------|--------------|----------|-------------|
| EMC9          | 0.279808164  | 3.085431881 | 5.204878365  | 2.85E-07 | 5.48880101  |
| SQLE          | 0.392133027  | 3.885578094 | 5.204298622  | 2.85E-07 | 5.485940051 |
| PTH1R         | -0.243633545 | 0.84394241  | -5.204234015 | 2.86E-07 | 5.485621241 |
| TRABD2A       | -0.283682888 | 0.845603606 | -5.203678035 | 2.86E-07 | 5.482877847 |
| ILF3          | 0.2122938    | 4.579763369 | 5.201996646  | 2.89E-07 | 5.474582906 |
| UQCRB         | 0.232225351  | 4.0134416   | 5.201510868  | 2.90E-07 | 5.472186821 |
| CXCL6         | -0.538873494 | 1.109652588 | -5.2012313   | 2.90E-07 | 5.47080795  |
| IGHV3-20      | -0.735269473 | 2.423002541 | -5.201209596 | 2.90E-07 | 5.470700908 |
| PDAP1         | 0.226984395  | 5.327315577 | 5.200677206  | 2.91E-07 | 5.468075279 |
| GPR15         | -0.324871777 | 0.662264511 | -5.198178032 | 2.95E-07 | 5.45575313  |
| ZMYND15       | -0.267534379 | 1.480388982 | -5.196704901 | 2.97E-07 | 5.448492361 |
| APBB2         | -0.242662861 | 1.926317176 | -5.195613058 | 2.98E-07 | 5.443112071 |
| UBAP2L        | 0.225244379  | 4.766546058 | 5.19467905   | 3.00E-07 | 5.438510355 |
| C20orf194     | -0.228628952 | 1.80875115  | -5.194090286 | 3.01E-07 | 5.435609989 |
| TFEB          | -0.261264574 | 2.338491747 | -5.19366209  | 3.01E-07 | 5.433500794 |
| CTTNBP2NL     | -0.217640257 | 2.697562602 | -5.19341726  | 3.02E-07 | 5.432294886 |
| NPR1          | -0.385187077 | 1.630585111 | -5.192754969 | 3.03E-07 | 5.429033038 |
| AC010894.3    | 0.21374965   | 0.800102505 | 5.191946513  | 3.04E-07 | 5.425051822 |
| PSME1         | -0.249837763 | 6.777108282 | -5.190813129 | 3.06E-07 | 5.419471441 |
| IL6           | -0.523138397 | 1.789290781 | -5.190030435 | 3.07E-07 | 5.415618368 |
| ARPC5         | -0.211831241 | 4.452499648 | -5.189741686 | 3.07E-07 | 5.414197041 |
| SLCO2A1       | -0.519729809 | 3.406675338 | -5.188925093 | 3.09E-07 | 5.410177846 |
| UQCC3         | 0.299889065  | 3.291121545 | 5.188262786  | 3.10E-07 | 5.406918453 |
| RP4-758J18.10 | 0.390899471  | 2.062148956 | 5.187777513  | 3.11E-07 | 5.404530527 |
| ALG8          | 0.227233445  | 3.671516454 | 5.187113591  | 3.12E-07 | 5.401263828 |
| RP11-794G24.1 | 0.201766188  | 0.480608276 | 5.185992909  | 3.13E-07 | 5.39575059  |
| RP11-532F12.5 | 0.38067568   | 3.081685803 | 5.185067389  | 3.15E-07 | 5.391198265 |
| GS1-44D20.1   | -0.223858893 | 1.070321792 | -5.184902594 | 3.15E-07 | 5.390387767 |
| ELF1          | -0.226614299 | 4.132957304 | -5.181948719 | 3.20E-07 | 5.375863928 |
| SPATA13       | -0.242844337 | 2.236017186 | -5.18107692  | 3.21E-07 | 5.371578815 |
| GCNT2         | 0.259575215  | 2.144370262 | 5.178121238  | 3.26E-07 | 5.357055714 |
| ACTN1         | -0.342219692 | 4.250928589 | -5.176723031 | 3.29E-07 | 5.350188046 |
| EFNB2         | -0.439716318 | 3.398213055 | -5.175486817 | 3.31E-07 | 5.344117436 |

|               |              |             |              |          |             |
|---------------|--------------|-------------|--------------|----------|-------------|
| SSBP2         | -0.224812945 | 1.308113543 | -5.174150403 | 3.33E-07 | 5.337556244 |
| S100P         | 1.309577943  | 5.377488848 | 5.173563345  | 3.34E-07 | 5.334674534 |
| ZNF474        | -0.240666851 | 0.4407323   | -5.169360961 | 3.41E-07 | 5.314054724 |
| RP5-1033H22.2 | 0.30094426   | 0.99973707  | 5.168685548  | 3.42E-07 | 5.310742079 |
| CENPO         | 0.23771541   | 1.725511041 | 5.168559867  | 3.42E-07 | 5.310125707 |
| MPST          | 0.293025241  | 3.324153475 | 5.167870797  | 3.44E-07 | 5.306746556 |
| ADRM1         | 0.25174405   | 5.64353829  | 5.166414278  | 3.46E-07 | 5.299605225 |
| TMEM45A       | -0.527393368 | 2.210118825 | -5.166330255 | 3.46E-07 | 5.299193314 |
| MIR621        | 0.349634922  | 3.693494379 | 5.165536728  | 3.48E-07 | 5.295303456 |
| TMEM81        | 0.20161646   | 1.615865194 | 5.165140117  | 3.48E-07 | 5.293359478 |
| MAMLD1        | -0.294695423 | 1.085176588 | -5.162208323 | 3.54E-07 | 5.278993512 |
| YRDC          | 0.211521585  | 3.679088163 | 5.162080699  | 3.54E-07 | 5.278368316 |
| PIGM          | 0.232303302  | 2.951810248 | 5.161693393  | 3.55E-07 | 5.276471081 |
| CD38          | -0.429743706 | 1.891452127 | -5.161487602 | 3.55E-07 | 5.27546306  |
| STX2          | -0.243244479 | 2.331774918 | -5.160483474 | 3.57E-07 | 5.270545074 |
| IGLV3-22      | -0.334440899 | 0.406585439 | -5.159408068 | 3.59E-07 | 5.265278936 |
| MYEF2         | 0.233065142  | 1.18437262  | 5.159051914  | 3.59E-07 | 5.263535113 |
| RCAN2         | -0.461539541 | 2.431195146 | -5.158497784 | 3.60E-07 | 5.260822157 |
| C11orf98      | 0.23792445   | 2.489937858 | 5.154804756  | 3.67E-07 | 5.242748205 |
| NDUFB4        | 0.246752115  | 5.408560635 | 5.154417902  | 3.68E-07 | 5.240855583 |
| NTHL1         | 0.317475536  | 3.344196352 | 5.152930746  | 3.71E-07 | 5.233581109 |
| MRPL21        | 0.242764434  | 3.522556501 | 5.151561025  | 3.73E-07 | 5.226882736 |
| ALDH3A2       | 0.461283358  | 4.605925942 | 5.150067882  | 3.76E-07 | 5.219582612 |
| SLBP          | 0.233106801  | 4.836165422 | 5.150043333  | 3.76E-07 | 5.219462607 |
| C2orf40       | -0.417228521 | 0.831471875 | -5.149309581 | 3.78E-07 | 5.215875934 |
| CTB-63M22.1   | 0.424652546  | 3.329012145 | 5.147895301  | 3.80E-07 | 5.208964048 |
| ABCG1         | -0.36342653  | 2.801646113 | -5.147745014 | 3.81E-07 | 5.208229666 |
| ZBTB38        | -0.229246036 | 2.858495559 | -5.146976816 | 3.82E-07 | 5.204476133 |
| CSE1L         | 0.285821378  | 4.665317491 | 5.146878789  | 3.82E-07 | 5.203997191 |
| AF131215.9    | -0.206250447 | 0.628727347 | -5.144729138 | 3.86E-07 | 5.193496528 |
| MIR7152       | -0.211339543 | 0.31100051  | -5.142558043 | 3.91E-07 | 5.18289511  |
| U47924.27     | 0.436132161  | 2.844819956 | 5.140546979  | 3.95E-07 | 5.173078707 |
| FAM111A       | -0.255350439 | 2.873883129 | -5.13992744  | 3.96E-07 | 5.170055312 |

|               |              |             |              |          |             |
|---------------|--------------|-------------|--------------|----------|-------------|
| RASGRF1       | -0.434606745 | 1.058150846 | -5.139009232 | 3.98E-07 | 5.165574993 |
| MRTO4         | 0.231951217  | 4.110363754 | 5.137475119  | 4.01E-07 | 5.158091015 |
| IGHE          | -0.374821622 | 0.665352081 | -5.137473846 | 4.01E-07 | 5.158084804 |
| NRTN          | 0.282869146  | 0.942106906 | 5.136743441  | 4.02E-07 | 5.154522325 |
| WFDC21P       | -0.564316736 | 2.212394247 | -5.13604646  | 4.04E-07 | 5.15112329  |
| LAMTOR5       | 0.258041325  | 4.895545223 | 5.134383879  | 4.07E-07 | 5.143016897 |
| TRPT1         | 0.235687434  | 3.5712561   | 5.133445007  | 4.09E-07 | 5.138440197 |
| MYO7A         | -0.256392413 | 1.415449699 | -5.132577618 | 4.11E-07 | 5.134212621 |
| RP11-53B5.1   | 0.429991172  | 0.574101464 | 5.130243907  | 4.16E-07 | 5.122841519 |
| LINC00884     | 0.218634202  | 0.80480269  | 5.130004679  | 4.16E-07 | 5.121676135 |
| FZD7          | -0.331485367 | 2.351414576 | -5.129206248 | 4.18E-07 | 5.117786976 |
| RGL2          | 0.27892826   | 4.325660326 | 5.126712077  | 4.23E-07 | 5.105641374 |
| RP13-582O9.5  | 0.286361682  | 1.665444468 | 5.126697743  | 4.23E-07 | 5.105571587 |
| GALE          | 0.316410212  | 4.335274519 | 5.121713267  | 4.34E-07 | 5.081315189 |
| GTPBP3        | 0.222573224  | 2.233541267 | 5.1210224    | 4.35E-07 | 5.077954835 |
| CTD-2521M24.9 | -0.283036984 | 1.755135839 | -5.12091891  | 4.36E-07 | 5.0774515   |
| RNF186        | 0.358991411  | 0.578341677 | 5.120216598  | 4.37E-07 | 5.074035958 |
| MIR3671       | -0.26832249  | 0.806913605 | -5.118000579 | 4.42E-07 | 5.063261597 |
| SPATS2L       | -0.341087449 | 3.7160389   | -5.117906225 | 4.42E-07 | 5.062802939 |
| TWIST1        | -0.396999788 | 0.971281904 | -5.115876876 | 4.47E-07 | 5.052940018 |
| EFNA3         | 0.351205259  | 1.887255257 | 5.115728871  | 4.47E-07 | 5.052220832 |
| SNHG11        | 0.217507269  | 2.090024262 | 5.113946555  | 4.51E-07 | 5.043561652 |
| IKBIP         | -0.251294647 | 2.597393846 | -5.11388346  | 4.51E-07 | 5.043255161 |
| CTHRC1        | -0.623566588 | 4.894822281 | -5.113146406 | 4.53E-07 | 5.039675103 |
| AKR7L         | 0.275083173  | 0.50331417  | 5.111589251  | 4.57E-07 | 5.032113129 |
| XPO5          | 0.247417958  | 3.02277189  | 5.111365061  | 4.57E-07 | 5.031024572 |
| CD109         | -0.481796747 | 1.933883274 | -5.111055297 | 4.58E-07 | 5.029520579 |
| DENND5A       | -0.208733912 | 3.116420364 | -5.108350776 | 4.64E-07 | 5.016392845 |
| SLC50A1       | 0.348838897  | 5.472602478 | 5.105394015  | 4.71E-07 | 5.002047895 |
| CRLF2         | -0.239428856 | 0.474103244 | -5.102152463 | 4.79E-07 | 4.986329844 |
| UBE2T         | 0.471912128  | 3.978248087 | 5.101390479  | 4.81E-07 | 4.982636345 |
| KLC2          | 0.246165681  | 2.954919431 | 5.100154617  | 4.84E-07 | 4.976646913 |
| PFAS          | 0.233917652  | 2.333775718 | 5.098857369  | 4.87E-07 | 4.970361388 |

|               |              |             |              |          |             |
|---------------|--------------|-------------|--------------|----------|-------------|
| FAM174B       | 0.392406716  | 3.19973862  | 5.098093716  | 4.89E-07 | 4.966661951 |
| MPDU1         | 0.241168624  | 4.44123426  | 5.097042163  | 4.91E-07 | 4.961568632 |
| RP11-481H12.1 | -0.316053044 | 1.308788766 | -5.096780999 | 4.92E-07 | 4.960303797 |
| RNU6-638P     | -0.208520853 | 0.476677161 | -5.096054866 | 4.94E-07 | 4.956787401 |
| TRIM45        | 0.242093083  | 1.253627772 | 5.09537029   | 4.95E-07 | 4.953472663 |
| CBLC          | 0.480742087  | 3.516402692 | 5.094220684  | 4.98E-07 | 4.947907135 |
| STK35         | 0.233514068  | 3.057570319 | 5.094036139  | 4.99E-07 | 4.947013813 |
| C6orf48       | 0.301770983  | 5.758048575 | 5.093887071  | 4.99E-07 | 4.946292242 |
| C5orf30       | 0.28863778   | 2.016100712 | 5.092989559  | 5.01E-07 | 4.941948209 |
| PARD3B        | -0.225389343 | 1.295952496 | -5.091579336 | 5.05E-07 | 4.935124002 |
| MIR6503       | -0.200703462 | 0.36514894  | -5.090541538 | 5.08E-07 | 4.930103081 |
| FAXDC2        | -0.536449941 | 2.434816056 | -5.090448252 | 5.08E-07 | 4.929651806 |
| TRMT61A       | 0.248795769  | 2.988788028 | 5.089915997  | 5.09E-07 | 4.92707713  |
| GPIHBP1       | -0.399934374 | 1.12167672  | -5.088481384 | 5.13E-07 | 4.920138685 |
| LINC01123     | 0.204931037  | 0.666625785 | 5.087738553  | 5.15E-07 | 4.916546708 |
| NFXL1         | 0.203658388  | 1.996872145 | 5.08766367   | 5.15E-07 | 4.916184636 |
| TROAP         | 0.448128242  | 1.938698966 | 5.086679437  | 5.17E-07 | 4.911426143 |
| RP11-417E7.2  | -0.34524354  | 0.865335497 | -5.085888404 | 5.20E-07 | 4.907602319 |
| TMEM184A      | 0.39575434   | 2.618952927 | 5.084592932  | 5.23E-07 | 4.901341213 |
| IFI27         | -0.688049222 | 5.473143106 | -5.084555023 | 5.23E-07 | 4.901158019 |
| UAP1L1        | -0.28808777  | 2.016372605 | -5.083867286 | 5.25E-07 | 4.897834743 |
| GOT1          | 0.323688679  | 4.520012204 | 5.081618758  | 5.31E-07 | 4.886972262 |
| RNA5SP498     | -0.242908895 | 0.635750998 | -5.081238575 | 5.32E-07 | 4.885136051 |
| CTTN          | 0.257585146  | 5.485521452 | 5.081236966  | 5.32E-07 | 4.885128284 |
| AKR1C1        | 1.093872527  | 2.578163458 | 5.080877888  | 5.33E-07 | 4.883394122 |
| CHML          | 0.40547159   | 2.584082155 | 5.079248222  | 5.37E-07 | 4.875525058 |
| EML1          | -0.241186991 | 1.181856795 | -5.078636153 | 5.39E-07 | 4.872570189 |
| RP11-474D1.3  | 0.383079413  | 0.35885363  | 5.075005637  | 5.49E-07 | 4.855049834 |
| DDX54         | 0.238022325  | 4.007270492 | 5.07334884   | 5.53E-07 | 4.847058115 |
| HPDL          | 0.365650535  | 0.932233984 | 5.070592815  | 5.61E-07 | 4.833769383 |
| TFCP2L1       | 0.563194601  | 2.659599813 | 5.067024107  | 5.71E-07 | 4.816571801 |
| BCAN          | 0.211508329  | 0.41488046  | 5.066725262  | 5.72E-07 | 4.815132163 |
| TBX2          | -0.352098943 | 2.209219382 | -5.066085722 | 5.74E-07 | 4.812051543 |

|              |              |             |              |          |             |
|--------------|--------------|-------------|--------------|----------|-------------|
| RP11-325K4.2 | -0.22848899  | 1.024451454 | -5.065641189 | 5.75E-07 | 4.809910462 |
| ITPRIPL2     | -0.284894084 | 3.201813896 | -5.065450231 | 5.75E-07 | 4.80899077  |
| SH3RF3       | -0.249859308 | 1.4218589   | -5.065040989 | 5.77E-07 | 4.807019887 |
| PXMP2        | 0.244719621  | 2.807125715 | 5.063564582  | 5.81E-07 | 4.799910792 |
| HAL          | 0.480707662  | 1.148370425 | 5.062643112  | 5.84E-07 | 4.79547474  |
| IARS2        | 0.229756776  | 5.237333999 | 5.061602109  | 5.87E-07 | 4.790464121 |
| CHI3L2       | -0.552681756 | 2.129645197 | -5.06101863  | 5.88E-07 | 4.787656089 |
| PARD3        | 0.26545938   | 3.379135793 | 5.06065168   | 5.89E-07 | 4.785890267 |
| EPHB2        | -0.411432423 | 1.818940749 | -5.060495885 | 5.90E-07 | 4.78514059  |
| HSP90AB1     | 0.239425259  | 8.84825913  | 5.056719858  | 6.01E-07 | 4.766976961 |
| SPSB2        | 0.361105094  | 3.372111074 | 5.055706604  | 6.04E-07 | 4.762105039 |
| DGKA         | -0.277180649 | 1.993394658 | -5.055298092 | 6.05E-07 | 4.760141083 |
| EIF3B        | 0.253642949  | 4.764957706 | 5.054597276  | 6.07E-07 | 4.756772184 |
| AC115522.3   | -0.229684576 | 0.607177138 | -5.054283718 | 6.08E-07 | 4.755265015 |
| PTPN21       | -0.257424512 | 1.741388559 | -5.053439067 | 6.11E-07 | 4.751205472 |
| TRAP1        | 0.216736048  | 3.666759138 | 5.0515808    | 6.17E-07 | 4.742276464 |
| SRXN1        | 0.385621387  | 1.105850258 | 5.051343714  | 6.17E-07 | 4.741137475 |
| MRPL9        | 0.224890752  | 4.891007985 | 5.049851344  | 6.22E-07 | 4.733969058 |
| ATP5G3       | 0.231630583  | 4.46633994  | 5.049405223  | 6.23E-07 | 4.73182654  |
| IFT81        | 0.238055983  | 1.842982864 | 5.048766855  | 6.25E-07 | 4.728761045 |
| TJP3         | 0.391615425  | 3.449694821 | 5.04798444   | 6.28E-07 | 4.725004303 |
| BANF1        | 0.23160859   | 6.069552187 | 5.045942755  | 6.34E-07 | 4.715203682 |
| TLR5         | -0.276874986 | 1.78175495  | -5.043828969 | 6.41E-07 | 4.705060727 |
| SDPR         | -0.526484695 | 3.327873653 | -5.042244585 | 6.46E-07 | 4.697460612 |
| CEP85        | 0.241159848  | 2.339362667 | 5.040533969  | 6.51E-07 | 4.689257397 |
| RANBP1       | 0.266558361  | 3.803478904 | 5.038930243  | 6.57E-07 | 4.681569046 |
| IGHJ1P       | -0.220615744 | 0.260723662 | -5.037671539 | 6.61E-07 | 4.675536303 |
| ADD3         | -0.411020693 | 3.479147865 | -5.03715696  | 6.62E-07 | 4.673070406 |
| PIP5K1A      | 0.228232444  | 4.021779329 | 5.036790275  | 6.64E-07 | 4.671313367 |
| MVK          | 0.202685686  | 2.206203694 | 5.034707036  | 6.71E-07 | 4.661333336 |
| CTA-384D8.31 | -0.523622289 | 1.353714142 | -5.034057065 | 6.73E-07 | 4.658220325 |
| FEM1C        | -0.213190482 | 2.793630197 | -5.033737913 | 6.74E-07 | 4.65669189  |
| TRIB3        | 0.396215382  | 3.334295185 | 5.033530387  | 6.75E-07 | 4.65569809  |

|               |              |             |              |          |             |
|---------------|--------------|-------------|--------------|----------|-------------|
| MIR559        | 0.366590294  | 1.569036805 | 5.031926442  | 6.80E-07 | 4.648018339 |
| C1orf43       | 0.25013733   | 6.75372333  | 5.03056496   | 6.85E-07 | 4.641501239 |
| CTD-3074O7.5  | 0.213535623  | 1.269092509 | 5.029631636  | 6.88E-07 | 4.637034559 |
| PRPSAP2       | 0.216304198  | 2.791413303 | 5.028548255  | 6.91E-07 | 4.631850675 |
| HSPG2         | -0.468184748 | 4.009560672 | -5.028338919 | 6.92E-07 | 4.630849136 |
| PDGFD         | -0.348399677 | 1.739924303 | -5.028247106 | 6.92E-07 | 4.630409878 |
| GNA12         | -0.267300022 | 3.962578468 | -5.026950517 | 6.97E-07 | 4.624207475 |
| PLXDC1        | -0.247043138 | 1.402678171 | -5.02526362  | 7.03E-07 | 4.616140144 |
| CDKN1A        | -0.352758273 | 5.210840402 | -5.023473111 | 7.09E-07 | 4.607579972 |
| RP11-334C17.6 | 0.283844687  | 1.384663397 | 5.022885108  | 7.11E-07 | 4.604769415 |
| C11orf63      | -0.219923997 | 1.046222985 | -5.022741419 | 7.12E-07 | 4.604082652 |
| HSPB6         | -0.458605167 | 2.026134686 | -5.021167375 | 7.17E-07 | 4.596560636 |
| TICRR         | 0.210845164  | 0.7188898   | 5.020214123  | 7.21E-07 | 4.59200629  |
| AKR1C3        | 0.927961033  | 3.652295664 | 5.019816332  | 7.22E-07 | 4.590105997 |
| MME           | -0.394320994 | 1.139084873 | -5.018955932 | 7.25E-07 | 4.585996229 |
| PQLC3         | -0.26593878  | 3.969821766 | -5.018540906 | 7.27E-07 | 4.584014055 |
| RP11-123B3.2  | 0.328125759  | 0.528743212 | 5.017557623  | 7.30E-07 | 4.579318458 |
| PBK           | 0.476664746  | 2.127776342 | 5.017106372  | 7.32E-07 | 4.57716382  |
| AP000251.3    | 0.219614051  | 0.462939898 | 5.01662314   | 7.33E-07 | 4.574856675 |
| RASSF1        | -0.200269274 | 3.04295879  | -5.014100874 | 7.43E-07 | 4.562817607 |
| NIFK          | 0.204650156  | 4.126689135 | 5.013649031  | 7.44E-07 | 4.560661488 |
| PUS7          | 0.257403465  | 2.58691651  | 5.01344811   | 7.45E-07 | 4.559702777 |
| SLC3A2        | 0.273993781  | 5.063464116 | 5.013279656  | 7.46E-07 | 4.558899017 |
| SLC44A5       | 0.445718317  | 1.32429203  | 5.013076911  | 7.46E-07 | 4.557931675 |
| NAT9          | 0.225773569  | 3.386361491 | 5.012458375  | 7.49E-07 | 4.554980711 |
| RP11-1C8.4    | 0.209360736  | 0.225524267 | 5.012103501  | 7.50E-07 | 4.553287793 |
| AKR1B1        | -0.499130376 | 4.316470753 | -5.012080633 | 7.50E-07 | 4.553178706 |
| TMEM106C      | 0.33690853   | 4.458800374 | 5.011798198  | 7.51E-07 | 4.551831445 |
| RP11-496H1.1  | 0.259943466  | 0.819020982 | 5.011015816  | 7.54E-07 | 4.548099706 |
| PGM5          | -0.318687848 | 1.08296331  | -5.010203419 | 7.57E-07 | 4.54422536  |
| ZNF687        | 0.233156477  | 3.20222596  | 5.010026018  | 7.58E-07 | 4.543379404 |
| SERPINE2      | -0.422864259 | 1.893263205 | -5.009241934 | 7.61E-07 | 4.539640743 |
| PLTP          | -0.483313934 | 5.704528118 | -5.008409518 | 7.64E-07 | 4.535672204 |

|              |              |             |              |          |             |
|--------------|--------------|-------------|--------------|----------|-------------|
| MMAB         | 0.200518105  | 2.402679645 | 5.008052216  | 7.65E-07 | 4.533968951 |
| GDAP1        | 0.307501145  | 1.702396253 | 5.007587668  | 7.67E-07 | 4.53175462  |
| TLE6         | 0.270137497  | 1.311366995 | 5.007474895  | 7.67E-07 | 4.531217103 |
| EGR1         | -0.568825182 | 5.693159421 | -5.005897752 | 7.73E-07 | 4.523700983 |
| SLC5A6       | 0.227376122  | 2.897468043 | 5.004954103  | 7.77E-07 | 4.519204903 |
| FA2H         | 0.541198099  | 2.707318375 | 5.004560306  | 7.79E-07 | 4.517328855 |
| DSCAM-AS1    | 0.834742333  | 0.966957947 | 5.004296459  | 7.80E-07 | 4.516071963 |
| PKIG         | -0.365380794 | 3.830981527 | -5.000239976 | 7.95E-07 | 4.496755585 |
| NME2P1       | 0.222954951  | 1.018810592 | 4.996893728  | 8.09E-07 | 4.480831897 |
| FMO4         | -0.253388017 | 1.4845404   | -4.996835261 | 8.09E-07 | 4.480553759 |
| SOAT1        | -0.236327059 | 3.896217264 | -4.990918455 | 8.33E-07 | 4.452421524 |
| RP11-465N4.5 | 0.306089514  | 2.058362637 | 4.990372278  | 8.35E-07 | 4.449826173 |
| MCAM         | -0.384311425 | 3.550863642 | -4.989639175 | 8.38E-07 | 4.446342982 |
| PGD          | 0.429959294  | 6.201353274 | 4.988940825  | 8.41E-07 | 4.443025341 |
| DKC1         | 0.234920529  | 4.251790964 | 4.987016484  | 8.49E-07 | 4.433885581 |
| FAM167B      | -0.279014303 | 2.400996604 | -4.985004495 | 8.57E-07 | 4.424332942 |
| OAZ1         | -0.214524253 | 7.021492687 | -4.984385606 | 8.60E-07 | 4.421395243 |
| SHROOM4      | -0.325077315 | 1.6044678   | -4.983961905 | 8.62E-07 | 4.419384244 |
| SUN2         | -0.260898755 | 4.432558927 | -4.983937404 | 8.62E-07 | 4.419267958 |
| IGHD3-16     | -0.38378175  | 0.619692778 | -4.983683316 | 8.63E-07 | 4.418062066 |
| TRAFD1       | -0.208925186 | 4.051252986 | -4.983440012 | 8.64E-07 | 4.416907409 |
| AIFM1        | 0.206773935  | 3.985043751 | 4.983408933  | 8.64E-07 | 4.416759916 |
| EIF3H        | 0.21712857   | 5.27742799  | 4.983265911  | 8.65E-07 | 4.416081199 |
| ANKEF1       | 0.211512296  | 1.860054765 | 4.9819662    | 8.70E-07 | 4.409914153 |
| PRG4         | -0.470863072 | 0.995944386 | -4.98136767  | 8.73E-07 | 4.407074659 |
| DTYMK        | 0.290474552  | 3.757308817 | 4.980427592  | 8.77E-07 | 4.402615442 |
| NDUFS5       | 0.251318853  | 7.630433312 | 4.977399235  | 8.90E-07 | 4.388255744 |
| EFNA1        | 0.421384408  | 6.138980589 | 4.976417807  | 8.94E-07 | 4.383603762 |
| UBE2M        | 0.206336895  | 5.016056313 | 4.975801815  | 8.97E-07 | 4.380684371 |
| ATF5         | -0.304228995 | 4.036155736 | -4.975046436 | 9.00E-07 | 4.377104828 |
| CEP70        | 0.277447688  | 2.88254125  | 4.974139513  | 9.05E-07 | 4.372807809 |
| SLC48A1      | 0.226056381  | 2.898368005 | 4.972129218  | 9.13E-07 | 4.363285513 |
| TLDC2        | -0.255616058 | 1.028677458 | -4.970891212 | 9.19E-07 | 4.357423103 |

|              |              |             |              |          |             |
|--------------|--------------|-------------|--------------|----------|-------------|
| VIM-AS1      | -0.283531775 | 1.430170497 | -4.970735305 | 9.20E-07 | 4.356684921 |
| MST1         | 0.270442067  | 1.079000149 | 4.967929221  | 9.33E-07 | 4.343402361 |
| FAM110A      | 0.250109309  | 3.042060431 | 4.964873627  | 9.47E-07 | 4.328946466 |
| GCA          | -0.237490111 | 3.315487272 | -4.963675883 | 9.52E-07 | 4.323282182 |
| UTRN         | -0.31486177  | 2.960516338 | -4.963491417 | 9.53E-07 | 4.322409929 |
| DUSP10       | -0.340740167 | 2.946402318 | -4.961318424 | 9.63E-07 | 4.312137078 |
| SLC29A4      | 0.543087881  | 2.073056106 | 4.959950215  | 9.70E-07 | 4.305670942 |
| CSNK2A1      | 0.208956049  | 4.027335114 | 4.958968465  | 9.74E-07 | 4.301032198 |
| SLC12A6      | -0.208104985 | 2.150708598 | -4.9586723   | 9.76E-07 | 4.299632988 |
| CD81         | -0.265022244 | 6.103732452 | -4.957167571 | 9.83E-07 | 4.292525182 |
| C8orf59      | 0.269717873  | 3.675100553 | 4.956841367  | 9.85E-07 | 4.290984567 |
| SNHG6        | 0.350260524  | 5.412832774 | 4.956171496  | 9.88E-07 | 4.287821153 |
| CILP2        | -0.456537872 | 1.635011974 | -4.954238844 | 9.97E-07 | 4.278696518 |
| FTL          | -0.366747926 | 12.07011372 | -4.95417881  | 9.98E-07 | 4.27841313  |
| CDA          | -0.787376201 | 3.067197339 | -4.953763529 | 1.00E-06 | 4.276452907 |
| AGPAT6       | 0.284400001  | 3.612588554 | 4.952230777  | 1.01E-06 | 4.269219242 |
| PAPOLA       | 0.203959808  | 4.040732439 | 4.951529362  | 1.01E-06 | 4.26590966  |
| PPP2R5B      | -0.231976667 | 2.822602758 | -4.950321966 | 1.02E-06 | 4.26021364  |
| GYG1         | -0.220066663 | 3.727666523 | -4.947132663 | 1.03E-06 | 4.245173803 |
| FURIN        | 0.508138169  | 5.851756232 | 4.946818229  | 1.03E-06 | 4.243691498 |
| PODNL1       | -0.489204833 | 1.843295482 | -4.945949808 | 1.04E-06 | 4.239598031 |
| MRPL17       | 0.212561151  | 4.621249066 | 4.94552819   | 1.04E-06 | 4.237610889 |
| RAB23        | -0.237386215 | 1.571523171 | -4.94453347  | 1.05E-06 | 4.232923252 |
| UNG          | 0.263120802  | 4.028186411 | 4.944091149  | 1.05E-06 | 4.230839081 |
| CCT5         | 0.305517243  | 5.297475489 | 4.943332322  | 1.05E-06 | 4.227263955 |
| CCBE1        | -0.368231453 | 0.802590443 | -4.943174197 | 1.05E-06 | 4.226519029 |
| PLIN3        | -0.281536473 | 4.823484956 | -4.942355542 | 1.06E-06 | 4.222662704 |
| RP3-395M20.9 | -0.242717923 | 0.617344647 | -4.940326828 | 1.07E-06 | 4.213108808 |
| EIF5A        | 0.253713068  | 6.945088123 | 4.939930727  | 1.07E-06 | 4.211243848 |
| CD207        | -0.721023634 | 1.836775867 | -4.939314235 | 1.07E-06 | 4.208341496 |
| SGCB         | -0.273109816 | 2.800216607 | -4.939229359 | 1.07E-06 | 4.207941941 |
| PGBD5        | -0.27027225  | 0.726817283 | -4.938684788 | 1.08E-06 | 4.205378493 |
| C5orf15      | -0.227485269 | 5.264839529 | -4.937915514 | 1.08E-06 | 4.201757747 |



|              |              |             |              |          |             |
|--------------|--------------|-------------|--------------|----------|-------------|
| RP11-474D1.4 | 0.222898147  | 0.179572134 | 4.937275389  | 1.08E-06 | 4.198745253 |
| APH1B        | -0.235792445 | 1.885279999 | -4.936664074 | 1.09E-06 | 4.195868675 |
| GOT2         | 0.205245776  | 4.649217734 | 4.936641113  | 1.09E-06 | 4.195760636 |
| GALNT5       | -0.482514841 | 2.244129418 | -4.93442447  | 1.10E-06 | 4.185332839 |
| CMTM6        | -0.208648638 | 4.949995029 | -4.933168987 | 1.11E-06 | 4.179428531 |
| APCDD1       | -0.34239455  | 1.841503718 | -4.932634383 | 1.11E-06 | 4.176914798 |
| MIR4664      | 0.435103704  | 2.579698351 | 4.93147328   | 1.11E-06 | 4.171456092 |
| SLC25A15     | 0.264218639  | 2.068048105 | 4.931162277  | 1.12E-06 | 4.169994166 |
| SULT1C4      | -0.223394257 | 0.718987292 | -4.926732593 | 1.14E-06 | 4.149180726 |
| SOX17        | -0.226559316 | 0.902857231 | -4.92668411  | 1.14E-06 | 4.148953014 |
| CYP4F11      | 0.621900423  | 1.21967133  | 4.924792577  | 1.15E-06 | 4.140070651 |
| C14orf2      | 0.236370716  | 4.018291004 | 4.924400808  | 1.15E-06 | 4.138231345 |
| PRUNE        | 0.226287052  | 3.887951913 | 4.923145586  | 1.16E-06 | 4.13233914  |
| RP4-694B14.8 | 0.236902144  | 1.057780384 | 4.921630696  | 1.17E-06 | 4.12522982  |
| FIGF         | -0.475816269 | 1.218521176 | -4.920364045 | 1.18E-06 | 4.119287002 |
| LAPTM4B      | 0.411339418  | 6.510791195 | 4.920107203  | 1.18E-06 | 4.118082131 |
| ZHX2         | -0.22408938  | 2.957809041 | -4.91984817  | 1.18E-06 | 4.116867041 |
| SPIDR        | 0.227220091  | 3.418733956 | 4.918592189  | 1.19E-06 | 4.110976211 |
| LRRC18       | -0.216290283 | 0.339199176 | -4.917216312 | 1.19E-06 | 4.104524613 |
| DDC          | 0.607369072  | 0.961100567 | 4.91617736   | 1.20E-06 | 4.099653966 |
| AC068580.6   | -0.247376642 | 1.348354538 | -4.914916603 | 1.21E-06 | 4.09374474  |
| IGHD2-21     | -0.306392121 | 0.398759713 | -4.914836338 | 1.21E-06 | 4.093368582 |
| GOLPH3       | 0.229344415  | 6.009390863 | 4.914177374  | 1.21E-06 | 4.090280584 |
| MACF1        | -0.294404442 | 2.867090831 | -4.913760709 | 1.22E-06 | 4.088328224 |
| TFG          | 0.219879168  | 4.665192228 | 4.912461249  | 1.22E-06 | 4.082240338 |
| SEMA4G       | 0.407276574  | 1.767684569 | 4.911914333  | 1.23E-06 | 4.079678508 |
| MBP          | -0.211120767 | 1.876731962 | -4.911857303 | 1.23E-06 | 4.079411384 |
| HDDC3        | 0.206003497  | 2.131205086 | 4.911672116  | 1.23E-06 | 4.078544011 |
| TDRD7        | -0.203834391 | 2.65344061  | -4.908626488 | 1.25E-06 | 4.064283237 |
| CNIH3        | -0.212435156 | 0.754499875 | -4.908590119 | 1.25E-06 | 4.064112994 |
| IDH2         | 0.316344104  | 5.682191853 | 4.90814669   | 1.25E-06 | 4.062037379 |
| SLC52A2      | 0.297859553  | 4.824303641 | 4.907651867  | 1.25E-06 | 4.059721391 |
| EMCN         | -0.322487556 | 1.583308215 | -4.907158609 | 1.25E-06 | 4.057412946 |

|              |              |             |              |          |             |
|--------------|--------------|-------------|--------------|----------|-------------|
| PLA1A        | -0.460087094 | 1.907245394 | -4.904931063 | 1.27E-06 | 4.046990653 |
| MRGBP        | 0.237318405  | 3.307995557 | 4.903243553  | 1.28E-06 | 4.039097948 |
| CSNK1E       | 0.248534923  | 4.279316978 | 4.899741549  | 1.30E-06 | 4.022726489 |
| SAA2-SAA4    | -0.393880001 | 0.674058705 | -4.897965602 | 1.31E-06 | 4.0144282   |
| DPH2         | 0.211639587  | 3.3852522   | 4.896195626  | 1.32E-06 | 4.006160527 |
| IGLV1-41     | -0.707862379 | 1.74322234  | -4.895945223 | 1.33E-06 | 4.004991097 |
| KAT2A        | 0.311463711  | 4.201019658 | 4.894656265  | 1.33E-06 | 3.998972278 |
| UQCRH        | 0.259634781  | 6.128846382 | 4.894025133  | 1.34E-06 | 3.996025718 |
| GBP6         | -0.344353478 | 0.638325266 | -4.892725003 | 1.35E-06 | 3.989956899 |
| FTLP14       | 0.369564989  | 1.948692273 | 4.892682698  | 1.35E-06 | 3.989759451 |
| PIEZO1       | -0.315881019 | 3.47646051  | -4.892343604 | 1.35E-06 | 3.98817686  |
| ETV4         | 0.489888884  | 3.599076497 | 4.892101037  | 1.35E-06 | 3.987044835 |
| SLC18A2      | -0.213896637 | 0.538058129 | -4.88972286  | 1.37E-06 | 3.97594892  |
| PRPF6        | 0.22021807   | 5.619079959 | 4.888513928  | 1.37E-06 | 3.97031026  |
| F7           | 0.237276997  | 0.28107308  | 4.888433841  | 1.37E-06 | 3.969936763 |
| RUNX1        | -0.251254504 | 3.312597788 | -4.88667074  | 1.39E-06 | 3.961715756 |
| SF3B4        | 0.235542224  | 5.611384495 | 4.884944861  | 1.40E-06 | 3.953670915 |
| CPLX1        | 0.3537288    | 1.431477522 | 4.88438608   | 1.40E-06 | 3.951066822 |
| AC004967.7   | 0.275497825  | 2.933856122 | 4.882624112  | 1.41E-06 | 3.942857273 |
| VNN1         | -0.483721652 | 1.252182606 | -4.882037593 | 1.42E-06 | 3.940125096 |
| SLC4A7       | -0.237341979 | 1.747051044 | -4.881858434 | 1.42E-06 | 3.939290584 |
| TCEB1        | 0.260860888  | 3.59264578  | 4.881092777  | 1.42E-06 | 3.9357245   |
| RP11-211C9.1 | 0.261509913  | 0.573377414 | 4.880358251  | 1.43E-06 | 3.932303888 |
| PMEPA1       | -0.441810759 | 4.307246711 | -4.88010864  | 1.43E-06 | 3.931141579 |
| ISYNA1       | 0.398373039  | 3.737468147 | 4.879423182  | 1.44E-06 | 3.927950042 |
| PAXIP1-AS1   | 0.272887899  | 2.27483934  | 4.879215073  | 1.44E-06 | 3.926981152 |
| PLEKHH3      | 0.258967187  | 2.847567571 | 4.878579359  | 1.44E-06 | 3.924021706 |
| RP11-325K4.3 | -0.233228456 | 1.130137688 | -4.877249633 | 1.45E-06 | 3.917832551 |
| PSMB6        | 0.219795789  | 5.865850041 | 4.87516766   | 1.47E-06 | 3.908145167 |
| DENND3       | -0.241975779 | 1.946300052 | -4.874986076 | 1.47E-06 | 3.907300434 |
| MFF          | 0.206358565  | 3.406136517 | 4.873860738  | 1.47E-06 | 3.902066001 |
| RAD21        | 0.263683984  | 5.243222832 | 4.872876457  | 1.48E-06 | 3.89748858  |
| NPC1         | -0.259299805 | 3.03227923  | -4.872786146 | 1.48E-06 | 3.897068628 |

|               |              |             |              |          |             |
|---------------|--------------|-------------|--------------|----------|-------------|
| BCHE          | -0.280561838 | 0.752085978 | -4.872736091 | 1.48E-06 | 3.896835874 |
| AC007283.4    | -0.204601223 | 0.639403024 | -4.8703443   | 1.50E-06 | 3.885716594 |
| RPL8          | 0.319281279  | 9.503655859 | 4.869887819  | 1.50E-06 | 3.883595008 |
| RP5-908M14.9  | 0.314993582  | 1.533948682 | 4.867192155  | 1.52E-06 | 3.871070056 |
| FBXO6         | -0.309362905 | 3.781587901 | -4.867175092 | 1.52E-06 | 3.870990794 |
| SLC7A1        | 0.307945628  | 2.858679501 | 4.866054937  | 1.53E-06 | 3.865788049 |
| P4HA2         | -0.272343888 | 3.329472302 | -4.864693516 | 1.54E-06 | 3.859466175 |
| COX8A         | 0.231293036  | 7.755527475 | 4.864422413  | 1.54E-06 | 3.858207475 |
| SCML2         | 0.205815031  | 0.490538413 | 4.863856001  | 1.55E-06 | 3.8555779   |
| AURKA         | 0.43959921   | 2.928729066 | 4.862226161  | 1.56E-06 | 3.848012891 |
| NDUFB11       | 0.23845448   | 5.888146181 | 4.861124353  | 1.57E-06 | 3.842900085 |
| NDUFS6        | 0.287100026  | 5.37127308  | 4.860986406  | 1.57E-06 | 3.842260035 |
| ATP7B         | 0.332744105  | 1.225784782 | 4.859590129  | 1.58E-06 | 3.83578246  |
| RP11-111M22.4 | 0.23738091   | 0.848286305 | 4.858919272  | 1.58E-06 | 3.832670838 |
| NME4          | 0.30811649   | 4.601711611 | 4.857629775  | 1.59E-06 | 3.826690887 |
| CTD-2135D7.5  | -0.205074341 | 0.444984231 | -4.852210853 | 1.64E-06 | 3.8015768   |
| ADAMTS7P3     | -0.209783383 | 0.291679914 | -4.850796338 | 1.65E-06 | 3.795025405 |
| RPAIN         | 0.211601424  | 2.268304344 | 4.849422566  | 1.66E-06 | 3.78866437  |
| KIAA1324      | 0.725051629  | 2.767505973 | 4.848177837  | 1.67E-06 | 3.782902264 |
| ATP6V0D1      | -0.203839529 | 3.950345248 | -4.845352651 | 1.69E-06 | 3.769828896 |
| U8            | 0.509414756  | 0.884409057 | 4.845123421  | 1.69E-06 | 3.768768451 |
| CPS1          | 1.057552153  | 1.578529534 | 4.844851652  | 1.70E-06 | 3.767511277 |
| EDNRB         | -0.367602269 | 1.801642561 | -4.84070231  | 1.73E-06 | 3.748324827 |
| WDR72         | 0.469453605  | 0.902512762 | 4.840454402  | 1.73E-06 | 3.747178982 |
| SOX4          | 0.346438039  | 5.296039865 | 4.840367833  | 1.73E-06 | 3.746778866 |
| RPL7          | 0.285936526  | 7.476415334 | 4.840233439  | 1.73E-06 | 3.746157719 |
| NR2F1         | -0.377242017 | 2.870103131 | -4.839857538 | 1.74E-06 | 3.744420455 |
| RNASEH1-AS1   | 0.261628028  | 2.254296206 | 4.839181761  | 1.74E-06 | 3.741297593 |
| MCU           | 0.281304927  | 3.704980316 | 4.838695532  | 1.75E-06 | 3.739050905 |
| CFAP57        | -0.291936871 | 0.69953032  | -4.83624752  | 1.77E-06 | 3.727742642 |
| RECQL         | -0.293166285 | 2.819919409 | -4.835433549 | 1.77E-06 | 3.723983767 |
| HSPB8         | -0.442028576 | 3.099839449 | -4.835396901 | 1.77E-06 | 3.723814543 |
| TNFRSF11B     | -0.387621577 | 1.461609766 | -4.834697249 | 1.78E-06 | 3.720584069 |

|              |              |             |              |          |             |
|--------------|--------------|-------------|--------------|----------|-------------|
| AC026271.5   | 0.218468089  | 1.740509437 | 4.834029613  | 1.79E-06 | 3.717501815 |
| RP11-390F4.6 | 0.231099209  | 0.44482881  | 4.833664435  | 1.79E-06 | 3.715816073 |
| SHFM1        | 0.238712945  | 3.110946017 | 4.832818556  | 1.80E-06 | 3.711911761 |
| KCNN4        | -0.628014206 | 3.616647349 | -4.830060358 | 1.82E-06 | 3.699185093 |
| SIGLEC12     | -0.301903137 | 0.779682863 | -4.829124154 | 1.83E-06 | 3.694866837 |
| CDC25A       | 0.260622524  | 1.13797279  | 4.828024555  | 1.84E-06 | 3.689795888 |
| SAA4         | -0.264380214 | 0.460335454 | -4.826835755 | 1.85E-06 | 3.684314763 |
| FAM162B      | -0.307531433 | 1.483295973 | -4.82628445  | 1.85E-06 | 3.681773309 |
| B4GALT2      | 0.232346177  | 4.13347436  | 4.82466806   | 1.87E-06 | 3.674323466 |
| BATF         | -0.410354457 | 3.684453703 | -4.824080331 | 1.87E-06 | 3.671615219 |
| OBSL1        | 0.431949788  | 2.982984404 | 4.824028958  | 1.87E-06 | 3.671378512 |
| SLC35A2      | 0.260666743  | 4.290840726 | 4.823894687  | 1.88E-06 | 3.670759838 |
| GAS2         | 0.296591038  | 0.625459888 | 4.823769326  | 1.88E-06 | 3.670182238 |
| CPLX2        | 0.632646341  | 0.579934064 | 4.823642071  | 1.88E-06 | 3.669595923 |
| TMED3        | 0.250866523  | 3.015760238 | 4.8221754    | 1.89E-06 | 3.662839398 |
| LYRM4        | 0.201983696  | 1.877139018 | 4.821054098  | 1.90E-06 | 3.657675151 |
| ESPL1        | 0.321357513  | 1.311566173 | 4.820476707  | 1.91E-06 | 3.655016354 |
| PHACTR1      | -0.253432287 | 1.11312883  | -4.820208867 | 1.91E-06 | 3.653783093 |
| GLI3         | -0.309678999 | 1.155398425 | -4.818253883 | 1.93E-06 | 3.644783301 |
| B4GALT3      | 0.211650302  | 4.250036629 | 4.816358158  | 1.94E-06 | 3.636059491 |
| RP11-21L23.4 | 0.330946524  | 0.461337108 | 4.81467396   | 1.96E-06 | 3.628311711 |
| FOXRED1      | 0.210883778  | 2.488501327 | 4.810335604  | 2.00E-06 | 3.608365431 |
| PANX2        | 0.485485123  | 2.300013825 | 4.809852162  | 2.01E-06 | 3.606143746 |
| AC093673.5   | -0.32469463  | 3.228896551 | -4.809268044 | 2.01E-06 | 3.603459667 |
| NCOA4        | -0.220057635 | 5.639452365 | -4.808219895 | 2.02E-06 | 3.598644065 |
| PSRC1        | 0.291514916  | 1.8014024   | 4.80600624   | 2.04E-06 | 3.588476821 |
| MSH2         | 0.260157     | 3.24556974  | 4.805526203  | 2.05E-06 | 3.586272589 |
| AC009005.2   | 0.347481813  | 1.792563297 | 4.805267202  | 2.05E-06 | 3.585083393 |
| E2F1         | 0.409497544  | 3.119871405 | 4.804308127  | 2.06E-06 | 3.580680337 |
| SUGCT        | -0.313726995 | 1.178579514 | -4.804214526 | 2.06E-06 | 3.580250662 |
| CCNJ         | 0.206138885  | 1.984425937 | 4.803132261  | 2.07E-06 | 3.575283096 |
| RP11-672A2.1 | 0.270804275  | 0.286704937 | 4.798123667  | 2.12E-06 | 3.552307064 |
| NOL6         | 0.220521773  | 3.761481597 | 4.797857109  | 2.12E-06 | 3.551084892 |

|               |              |             |              |          |             |
|---------------|--------------|-------------|--------------|----------|-------------|
| HLA-G         | -0.503533783 | 2.248194856 | -4.797768678 | 2.12E-06 | 3.550679444 |
| RP11-44K6.4   | -0.205945723 | 0.378077337 | -4.797546348 | 2.13E-06 | 3.549660121 |
| SUV420H2      | 0.24345473   | 1.721091829 | 4.796760334  | 2.14E-06 | 3.546056801 |
| PLS3          | -0.386767142 | 5.419694536 | -4.796258747 | 2.14E-06 | 3.543757659 |
| OSBPL3        | -0.289465209 | 2.579904054 | -4.795774599 | 2.15E-06 | 3.54153866  |
| STIP1         | 0.221709629  | 5.351104377 | 4.791440378  | 2.19E-06 | 3.521682696 |
| MAPRE2        | -0.245992936 | 3.103680938 | -4.786471438 | 2.24E-06 | 3.498939084 |
| PRRT3-AS1     | 0.311034361  | 1.506797903 | 4.786297613  | 2.24E-06 | 3.498143849 |
| TRMT6         | 0.223821911  | 2.859413652 | 4.784354266  | 2.27E-06 | 3.489254993 |
| RP11-626G11.4 | 0.243835759  | 0.6499477   | 4.781714739  | 2.29E-06 | 3.477187084 |
| IGKV1-13      | -0.44608437  | 0.874320191 | -4.779799458 | 2.31E-06 | 3.468434229 |
| PLEKHA4       | -0.340683685 | 2.643601553 | -4.778130968 | 2.33E-06 | 3.46081182  |
| FAM107A       | -0.388934173 | 1.33328037  | -4.776932923 | 2.35E-06 | 3.455340109 |
| RAB20         | -0.287242328 | 4.530442472 | -4.775677483 | 2.36E-06 | 3.449607603 |
| CH17-360D5.2  | -0.289626783 | 0.589663284 | -4.774843901 | 2.37E-06 | 3.44580212  |
| RP11-799B12.1 | 0.383932701  | 2.336814246 | 4.773664913  | 2.38E-06 | 3.440420816 |
| CCDC89        | -0.209627462 | 0.558466661 | -4.773490365 | 2.39E-06 | 3.439624225 |
| GATA6         | -0.381678787 | 1.93541991  | -4.772216438 | 2.40E-06 | 3.433811139 |
| GUCY2EP       | 0.253911788  | 0.26107337  | 4.771852294  | 2.40E-06 | 3.432149767 |
| LRCH2         | -0.266944613 | 0.853661272 | -4.771722551 | 2.41E-06 | 3.431557853 |
| CHD7          | 0.264676343  | 1.604144857 | 4.770869419  | 2.42E-06 | 3.427666072 |
| PSME2         | -0.265027943 | 5.391310137 | -4.770867483 | 2.42E-06 | 3.427657238 |
| NUDT5         | 0.211565352  | 3.817008176 | 4.770831667  | 2.42E-06 | 3.42749387  |
| ZDHHC16       | 0.223817068  | 4.309152358 | 4.770489324  | 2.42E-06 | 3.425932373 |
| SH3BP5        | -0.284904538 | 1.888527183 | -4.770462701 | 2.42E-06 | 3.425810945 |
| ARHGEF19      | 0.37178614   | 3.364512515 | 4.770422595  | 2.42E-06 | 3.42562802  |
| LRRC45        | 0.269162596  | 3.075112348 | 4.765814531  | 2.47E-06 | 3.4046199   |
| ESAM          | -0.386192214 | 3.831687093 | -4.765702743 | 2.48E-06 | 3.404110486 |
| LRRK2         | -0.603447793 | 2.324168882 | -4.764018577 | 2.49E-06 | 3.396437175 |
| SHMT2         | 0.296958344  | 4.485352055 | 4.76334212   | 2.50E-06 | 3.393355836 |
| LINC01273     | 0.202899546  | 0.868700101 | 4.762681031  | 2.51E-06 | 3.390344883 |
| DLX6          | 0.213993001  | 0.285726997 | 4.761846258  | 2.52E-06 | 3.386543422 |
| TIMM13        | 0.23872423   | 4.456124085 | 4.76173749   | 2.52E-06 | 3.386048149 |

|               |              |             |              |          |             |
|---------------|--------------|-------------|--------------|----------|-------------|
| DDRGK1        | 0.252298718  | 5.054128357 | 4.760711948  | 2.53E-06 | 3.381378883 |
| TGIF1         | 0.239008197  | 3.483387799 | 4.760444954  | 2.54E-06 | 3.380163414 |
| IFIT1         | -0.519449059 | 2.783799068 | -4.759773858 | 2.55E-06 | 3.377108582 |
| DHX58         | -0.294083855 | 2.7784833   | -4.759591369 | 2.55E-06 | 3.376277962 |
| TNS1          | -0.392900851 | 3.859201011 | -4.758388667 | 2.56E-06 | 3.370804436 |
| GPT           | 0.316721724  | 0.932418875 | 4.7581241    | 2.57E-06 | 3.36960055  |
| C9orf172      | 0.211273834  | 1.095629071 | 4.757108341  | 2.58E-06 | 3.364979024 |
| RP11-394O4.5  | -0.32463107  | 1.465256766 | -4.754574008 | 2.61E-06 | 3.353452172 |
| CTSH          | -0.561523346 | 5.977533441 | -4.751735395 | 2.64E-06 | 3.340548029 |
| RP11-16K12.1  | -0.227586897 | 0.465650225 | -4.751291753 | 2.65E-06 | 3.338531899 |
| RRP1          | 0.205626282  | 3.179937342 | 4.750565448  | 2.66E-06 | 3.335231576 |
| ZNF444        | 0.239225213  | 2.661865102 | 4.750532069  | 2.66E-06 | 3.335079911 |
| SLC25A39      | 0.237637921  | 5.690098555 | 4.750029088  | 2.67E-06 | 3.332794658 |
| CSRP1         | -0.207978878 | 4.628563906 | -4.749707863 | 2.67E-06 | 3.331335313 |
| FKBP2         | 0.288799978  | 5.580531399 | 4.748733923  | 2.68E-06 | 3.326911191 |
| CHURC1        | -0.215645752 | 3.152771864 | -4.748672105 | 2.68E-06 | 3.326630413 |
| POLR3H        | 0.309218509  | 3.018535843 | 4.747944671  | 2.69E-06 | 3.323326621 |
| SLC25A1       | 0.23764655   | 5.237376369 | 4.74626621   | 2.71E-06 | 3.315705319 |
| HSPBP1        | 0.243950049  | 4.237167196 | 4.746005478  | 2.72E-06 | 3.314521644 |
| MFSD10        | 0.285929898  | 4.977913587 | 4.74399987   | 2.74E-06 | 3.305418565 |
| FCGR3B        | -0.267463267 | 0.709720043 | -4.74061162  | 2.79E-06 | 3.290047908 |
| RP11-264I13.2 | -0.213672312 | 1.876240723 | -4.740525342 | 2.79E-06 | 3.289656641 |
| COQ3          | 0.210235758  | 2.248555227 | 4.738415348  | 2.82E-06 | 3.280089966 |
| CDT1          | 0.386209937  | 2.398145982 | 4.737538849  | 2.83E-06 | 3.276117081 |
| SLIRP         | 0.216364031  | 3.407274263 | 4.737535772  | 2.83E-06 | 3.276103134 |
| CYFIP2        | -0.33720031  | 2.35576665  | -4.736971702 | 2.84E-06 | 3.273546745 |
| KLF9          | -0.311088858 | 3.354476466 | -4.734762464 | 2.87E-06 | 3.263537055 |
| WEE1          | 0.254944621  | 2.444239021 | 4.73463388   | 2.87E-06 | 3.262954594 |
| GS1-124K5.4   | 0.281089286  | 1.660777247 | 4.733515283  | 2.88E-06 | 3.25788817  |
| TENM3         | -0.228468406 | 0.582983612 | -4.732857959 | 2.89E-06 | 3.254911485 |
| FRY           | -0.22573805  | 1.356749638 | -4.732223546 | 2.90E-06 | 3.252038909 |
| FBXO32        | -0.401330029 | 2.972626811 | -4.731150375 | 2.91E-06 | 3.247180472 |
| RANGRF        | 0.276043038  | 3.072229489 | 4.731113001  | 2.91E-06 | 3.247011292 |

|                 |              |             |              |          |             |
|-----------------|--------------|-------------|--------------|----------|-------------|
| TTC7A           | -0.214090192 | 3.386502381 | -4.730205723 | 2.93E-06 | 3.242904694 |
| RNASE1          | -0.617669666 | 7.919319035 | -4.730008549 | 2.93E-06 | 3.242012328 |
| MEDAG           | -0.408822702 | 1.806460657 | -4.727789112 | 2.96E-06 | 3.231969946 |
| ADAM28          | -0.383364107 | 2.019788048 | -4.727527577 | 2.96E-06 | 3.230786849 |
| RAPGEFL1        | 0.335885616  | 1.657025166 | 4.726544837  | 2.98E-06 | 3.226341806 |
| GLIS2           | -0.295925369 | 3.102951443 | -4.726113091 | 2.98E-06 | 3.224389236 |
| MRPS33          | 0.220421169  | 2.907318936 | 4.723003921  | 3.03E-06 | 3.210332839 |
| ATP5G2          | 0.218446821  | 5.788890352 | 4.722795727  | 3.03E-06 | 3.209391908 |
| CHMP1B          | 0.255889368  | 4.804535745 | 4.722098548  | 3.04E-06 | 3.206241285 |
| RP11-395B7.4    | -0.285575792 | 0.721797507 | -4.721644234 | 3.05E-06 | 3.204188424 |
| AC083900.1      | 0.200866899  | 0.542345961 | 4.721025224  | 3.06E-06 | 3.201391656 |
| TIPARP          | -0.426130308 | 3.586885162 | -4.720904123 | 3.06E-06 | 3.200844547 |
| DPP3            | 0.215648907  | 4.152860918 | 4.720363313  | 3.07E-06 | 3.198401429 |
| HYLS1           | 0.20994118   | 1.686402746 | 4.719990054  | 3.07E-06 | 3.196715376 |
| ARG2            | 0.365772085  | 1.71140022  | 4.719635247  | 3.08E-06 | 3.195112782 |
| VDAC2           | 0.21582699   | 4.409668023 | 4.719359675  | 3.08E-06 | 3.193868156 |
| MERTK           | -0.276293534 | 2.362625984 | -4.718905013 | 3.09E-06 | 3.191814808 |
| TRIB2           | -0.364000065 | 3.37985088  | -4.71776339  | 3.10E-06 | 3.186659805 |
| LL21NC02-1C16.2 | -0.462808146 | 1.305615919 | -4.717308608 | 3.11E-06 | 3.184606554 |
| DUSP1           | -0.530417549 | 6.833497278 | -4.717005406 | 3.12E-06 | 3.183237757 |
| CBX3            | 0.227387118  | 5.500033779 | 4.716612965  | 3.12E-06 | 3.181466213 |
| PLGRKT          | -0.282255663 | 3.715850803 | -4.715297271 | 3.14E-06 | 3.175527928 |
| KNSTRN          | 0.282658594  | 2.323386631 | 4.714748232  | 3.15E-06 | 3.17305033  |
| LINC01224       | 0.254046539  | 0.477108541 | 4.713033551  | 3.17E-06 | 3.165314348 |
| HSPA9           | 0.211578483  | 5.681413814 | 4.711157142  | 3.20E-06 | 3.156851657 |
| KIAA0930        | -0.212659772 | 3.339018119 | -4.710374088 | 3.21E-06 | 3.153320958 |
| HNRNPA1P16      | 0.202427955  | 1.164469334 | 4.709034645  | 3.23E-06 | 3.14728281  |
| CMTM4           | 0.292904515  | 3.168824906 | 4.708832307  | 3.24E-06 | 3.146370817 |
| MRPL23          | 0.227941625  | 3.238959068 | 4.708550204  | 3.24E-06 | 3.145099362 |
| SLC31A1         | -0.219137205 | 3.865606295 | -4.707020923 | 3.26E-06 | 3.138208    |
| LDOC1           | -0.551193019 | 4.41026897  | -4.705380312 | 3.29E-06 | 3.130817234 |
| RP4-755D9.1     | -0.347284968 | 0.827298399 | -4.70526752  | 3.29E-06 | 3.130309205 |
| CBLN3           | -0.229830274 | 1.506744874 | -4.703981576 | 3.31E-06 | 3.124517947 |

|               |              |             |              |          |             |
|---------------|--------------|-------------|--------------|----------|-------------|
| ATAD3B        | 0.293457351  | 2.14848683  | 4.702634871  | 3.33E-06 | 3.118454604 |
| ATPIF1        | 0.232788111  | 5.047633975 | 4.70238173   | 3.34E-06 | 3.11731505  |
| KLF5          | 0.371957492  | 4.788618936 | 4.702280399  | 3.34E-06 | 3.11685891  |
| GPX3          | -0.471899935 | 5.585648429 | -4.700921443 | 3.36E-06 | 3.110742437 |
| IGHD6-19      | -0.323627375 | 0.449409878 | -4.700657609 | 3.36E-06 | 3.109555143 |
| PAH           | 0.332924933  | 0.374795052 | 4.700151817  | 3.37E-06 | 3.107279176 |
| RP11-876N24.5 | -0.223529611 | 1.40510854  | -4.699916898 | 3.38E-06 | 3.106222161 |
| COL4A1        | -0.409270166 | 5.495224059 | -4.699290044 | 3.39E-06 | 3.103401876 |
| MANBA         | -0.223270897 | 2.801589157 | -4.698531099 | 3.40E-06 | 3.099987758 |
| SELM          | -0.371428684 | 4.078442719 | -4.69838132  | 3.40E-06 | 3.099314034 |
| WHSC1         | 0.245014304  | 2.40774513  | 4.6979253    | 3.41E-06 | 3.097262932 |
| RAB7B         | -0.472187095 | 2.574597703 | -4.697392643 | 3.42E-06 | 3.094867355 |
| NPW           | 0.557820018  | 1.094346717 | 4.69738325   | 3.42E-06 | 3.09482511  |
| C1orf95       | 0.418956297  | 0.657071588 | 4.696690126  | 3.43E-06 | 3.091708226 |
| SLC1A1        | -0.432876958 | 2.172802485 | -4.694679714 | 3.46E-06 | 3.08267006  |
| NR0B1         | 0.569776302  | 0.622838046 | 4.69448146   | 3.46E-06 | 3.081778964 |
| CAPN5         | 0.47306461   | 2.912778801 | 4.693883243  | 3.47E-06 | 3.079090359 |
| SMARCA1       | 0.350655835  | 4.155481623 | 4.693085469  | 3.49E-06 | 3.075505361 |
| NRIP1         | -0.303896932 | 2.861034675 | -4.691883269 | 3.50E-06 | 3.070104025 |
| NOC4L         | 0.213220836  | 3.504783952 | 4.691341067  | 3.51E-06 | 3.067668395 |
| NUDT18        | -0.237005286 | 2.511244427 | -4.690310615 | 3.53E-06 | 3.063040197 |
| FBP1          | -0.429245797 | 5.69904626  | -4.690296256 | 3.53E-06 | 3.062975714 |
| RP11-579D7.4  | 0.223034534  | 0.619354449 | 4.688509049  | 3.56E-06 | 3.054950836 |
| CHMP4C        | 0.307008339  | 3.848407925 | 4.687309686  | 3.58E-06 | 3.049567058 |
| ADCY7         | -0.291315855 | 1.768310663 | -4.686756511 | 3.59E-06 | 3.047084353 |
| HRSP12        | 0.24871261   | 3.486556226 | 4.685696249  | 3.61E-06 | 3.042326541 |
| TMED6         | 0.442227675  | 1.191389943 | 4.684716812  | 3.62E-06 | 3.037932298 |
| TP53INP1      | -0.333773652 | 3.7698625   | -4.683605873 | 3.64E-06 | 3.032949089 |
| UCKL1         | 0.243167628  | 3.652669108 | 4.68216146   | 3.67E-06 | 3.026471668 |
| C8orf33       | 0.236260072  | 4.134330397 | 4.681175717  | 3.68E-06 | 3.022052189 |
| MAZ           | 0.218823643  | 3.91633781  | 4.681109032  | 3.69E-06 | 3.021753246 |
| NEK7          | -0.226022548 | 3.828802216 | -4.677765243 | 3.74E-06 | 3.006768247 |
| COX17         | 0.232595457  | 3.690474734 | 4.677147574  | 3.75E-06 | 3.004001272 |



|           |              |             |              |          |             |
|-----------|--------------|-------------|--------------|----------|-------------|
| TGFBR1    | -0.250048759 | 3.336529738 | -4.67470531  | 3.80E-06 | 2.993063926 |
| GFPT1     | 0.255142144  | 4.41356321  | 4.673984091  | 3.81E-06 | 2.989835045 |
| NECAB2    | 0.226572699  | 0.328481689 | 4.672853289  | 3.83E-06 | 2.984773389 |
| NEK8      | 0.21674713   | 1.798892587 | 4.672472766  | 3.84E-06 | 2.983070354 |
| U47924.32 | 0.223688017  | 0.762594395 | 4.672222443  | 3.84E-06 | 2.981950103 |
| PHPT1     | 0.300050607  | 5.439869387 | 4.671757354  | 3.85E-06 | 2.97986887  |
| RNF19B    | -0.227331995 | 4.546518582 | -4.670074637 | 3.88E-06 | 2.972340445 |
| FZD1      | -0.346770494 | 2.95716932  | -4.670057703 | 3.88E-06 | 2.972264695 |
| ZNF239    | 0.252194718  | 1.748946401 | 4.66904696   | 3.90E-06 | 2.967743868 |
| SNRPGP2   | 0.272270637  | 3.381023213 | 4.668929222  | 3.90E-06 | 2.967217309 |
| PEPD      | -0.215477355 | 3.949332398 | -4.6685211   | 3.91E-06 | 2.96539217  |
| IMPDH2    | 0.233927412  | 5.589691255 | 4.667803045  | 3.92E-06 | 2.962181348 |
| MCL1      | -0.223053508 | 6.92382282  | -4.66434205  | 3.99E-06 | 2.94671166  |
| GADD45A   | -0.404375119 | 4.057955849 | -4.663376009 | 4.00E-06 | 2.942395602 |
| SGMS2     | -0.331387029 | 3.17897884  | -4.661320986 | 4.04E-06 | 2.933216934 |
| SUSD1     | -0.226221848 | 2.62961077  | -4.661239007 | 4.04E-06 | 2.932850855 |
| CRB3      | 0.29894862   | 3.994084633 | 4.660633296  | 4.06E-06 | 2.930146228 |
| NR3C1     | -0.245718014 | 3.34379802  | -4.660601556 | 4.06E-06 | 2.930004509 |
| IGLV3-29  | -0.384621507 | 0.7416901   | -4.658887514 | 4.09E-06 | 2.922352736 |
| SRPK1     | 0.229794129  | 3.821164334 | 4.658415522  | 4.10E-06 | 2.920246139 |
| FAM117B   | 0.200629897  | 2.174543394 | 4.656175707  | 4.14E-06 | 2.910252037 |
| GOLGA2    | 0.224132648  | 4.005836994 | 4.655893527  | 4.15E-06 | 2.908993255 |
| CKLF      | -0.289109238 | 3.458387529 | -4.654432507 | 4.17E-06 | 2.902476889 |
| GPX7      | -0.372269287 | 2.943842892 | -4.653977402 | 4.18E-06 | 2.900447437 |
| NSUN2     | 0.251484587  | 4.25844847  | 4.651769888  | 4.23E-06 | 2.890606035 |
| MYOF      | -0.381413955 | 4.802251734 | -4.651518807 | 4.23E-06 | 2.889486953 |
| MX1       | -0.483759183 | 3.699226242 | -4.64775257  | 4.31E-06 | 2.872707252 |
| DENND1C   | -0.233716128 | 2.878884842 | -4.647219482 | 4.32E-06 | 2.870333197 |
| AOX1      | -0.357094039 | 1.182838097 | -4.646739215 | 4.33E-06 | 2.868194586 |
| ENTPD6    | 0.246356365  | 4.275301521 | 4.646325845  | 4.33E-06 | 2.866354024 |
| NAA38     | 0.284718023  | 4.150855649 | 4.643802669  | 4.38E-06 | 2.85512266  |
| C17orf89  | 0.224678113  | 3.606072623 | 4.643302208  | 4.40E-06 | 2.852895632 |
| REPIN1    | 0.224598259  | 4.55914852  | 4.639312411  | 4.48E-06 | 2.835149094 |

|               |              |             |              |          |             |
|---------------|--------------|-------------|--------------|----------|-------------|
| STEAP2        | -0.407345533 | 2.143823561 | -4.638673181 | 4.49E-06 | 2.83230711  |
| FCGRT         | -0.297826693 | 5.338356906 | -4.637528927 | 4.51E-06 | 2.827220714 |
| TSNAX         | 0.200285088  | 3.14307268  | 4.637325235  | 4.52E-06 | 2.826315389 |
| GAS5          | 0.393664686  | 5.586175424 | 4.635744055  | 4.55E-06 | 2.819288963 |
| COA7          | 0.201624529  | 2.736362503 | 4.633128701  | 4.61E-06 | 2.807671708 |
| CTD-2132N18.4 | 0.211830403  | 1.031273171 | 4.632835964  | 4.61E-06 | 2.806371763 |
| CTD-2396E7.11 | 0.343431215  | 4.358960732 | 4.631912075  | 4.63E-06 | 2.802269574 |
| ITGA9         | -0.364611391 | 2.226545327 | -4.631882163 | 4.63E-06 | 2.802136776 |
| MAGED1        | 0.261262883  | 5.477848326 | 4.630892532  | 4.66E-06 | 2.797743544 |
| PAQR8         | -0.307574829 | 2.013532903 | -4.63088732  | 4.66E-06 | 2.797720405 |
| CYP26B1       | -0.260604254 | 0.990545058 | -4.624662655 | 4.79E-06 | 2.770107246 |
| EXOSC5        | 0.266197961  | 3.836163251 | 4.624572884  | 4.79E-06 | 2.769709265 |
| EMB           | -0.444385649 | 4.008865426 | -4.624520882 | 4.79E-06 | 2.769478727 |
| PIGR          | -1.097469205 | 5.83366572  | -4.624351499 | 4.80E-06 | 2.768727827 |
| MCM4          | 0.373400514  | 3.649719719 | 4.624113671  | 4.80E-06 | 2.76767354  |
| IRF6          | 0.292102843  | 3.891812001 | 4.624034499  | 4.81E-06 | 2.767322582 |
| PDIA3P1       | 0.245101618  | 2.495410717 | 4.623683832  | 4.81E-06 | 2.765768201 |
| SLC46A3       | -0.324677322 | 2.729475569 | -4.621828563 | 4.85E-06 | 2.75754625  |
| SORBS3        | -0.267117667 | 3.58088633  | -4.619366975 | 4.91E-06 | 2.746641966 |
| DCBLD2        | -0.469534228 | 3.15695646  | -4.617092427 | 4.96E-06 | 2.736570967 |
| HLA-S         | -0.327630007 | 1.014509121 | -4.616270299 | 4.98E-06 | 2.732931953 |
| EVA1A         | -0.444078912 | 3.136434724 | -4.615955478 | 4.99E-06 | 2.731538611 |
| TPM1          | -0.313348756 | 3.674183023 | -4.615889042 | 4.99E-06 | 2.731244586 |
| SRMS          | 0.329178079  | 0.962192623 | 4.614995207  | 5.01E-06 | 2.72728915  |
| IGIP          | -0.227302204 | 2.011760898 | -4.608453812 | 5.16E-06 | 2.698363294 |
| CCM2L         | -0.201675042 | 0.994081029 | -4.607259892 | 5.19E-06 | 2.693087878 |
| DMBT1         | -0.883594429 | 3.0013187   | -4.607246123 | 5.19E-06 | 2.693027046 |
| PFKFB3        | -0.381821532 | 4.493912056 | -4.606562615 | 5.21E-06 | 2.690007495 |
| XDH           | -0.444093492 | 1.73120737  | -4.605598185 | 5.23E-06 | 2.685747605 |
| AC010518.2    | -0.31373228  | 0.79606976  | -4.604921318 | 5.25E-06 | 2.68275837  |
| PPP1R12B      | -0.286382301 | 1.913395545 | -4.604380099 | 5.26E-06 | 2.680368484 |
| RAMP2         | -0.334770635 | 3.447296505 | -4.603375211 | 5.29E-06 | 2.675931839 |
| RFX5          | -0.213084443 | 3.936657762 | -4.6030541   | 5.29E-06 | 2.674514303 |

|               |              |             |              |          |             |
|---------------|--------------|-------------|--------------|----------|-------------|
| ASAP1         | -0.267273133 | 2.773779642 | -4.602948441 | 5.30E-06 | 2.674047893 |
| RBP4          | -0.522534374 | 1.708966363 | -4.602280836 | 5.31E-06 | 2.671101115 |
| STMN3         | -0.480125596 | 3.462161679 | -4.602191717 | 5.32E-06 | 2.67070778  |
| FABP5         | -0.411450138 | 2.693676646 | -4.602112542 | 5.32E-06 | 2.670358338 |
| RANBP6        | -0.207308457 | 2.66625662  | -4.602038486 | 5.32E-06 | 2.670031491 |
| LINC00676     | 0.801754899  | 0.849018014 | 4.601331894  | 5.34E-06 | 2.666913207 |
| OIP5          | 0.311459265  | 1.504626477 | 4.600763711  | 5.35E-06 | 2.664406058 |
| MIR222HG      | -0.238728223 | 0.890359638 | -4.598616762 | 5.40E-06 | 2.654935055 |
| IL1RL1        | -0.334833837 | 0.691966314 | -4.59740056  | 5.43E-06 | 2.649571729 |
| HSD17B10      | 0.207165563  | 5.770727117 | 4.59717366   | 5.44E-06 | 2.648571266 |
| RUNX2         | -0.265880577 | 1.645886108 | -4.596475402 | 5.46E-06 | 2.645492752 |
| TMEM200B      | -0.284772954 | 1.447062923 | -4.5964745   | 5.46E-06 | 2.645488772 |
| TMEM59L       | 0.7496812    | 1.934990316 | 4.596174185  | 5.46E-06 | 2.64416486  |
| AMN           | 0.415654939  | 1.391106474 | 4.595320778  | 5.49E-06 | 2.640403124 |
| MEST          | 0.323038715  | 3.912611193 | 4.594640863  | 5.50E-06 | 2.637406582 |
| HHIP          | -0.382990866 | 0.818691219 | -4.593824332 | 5.52E-06 | 2.633808482 |
| AGAP2-AS1     | -0.359576292 | 2.309301623 | -4.593494926 | 5.53E-06 | 2.632357095 |
| PDCD2L        | 0.249794351  | 2.760630901 | 4.592429506  | 5.56E-06 | 2.627663437 |
| NOP16         | 0.217605803  | 2.833851489 | 4.5922712    | 5.56E-06 | 2.626966114 |
| FAM189B       | 0.217963256  | 3.288413222 | 4.592059926  | 5.57E-06 | 2.626035505 |
| MRPS21        | 0.265331347  | 5.311295108 | 4.590752269  | 5.60E-06 | 2.620276479 |
| RP11-783K16.5 | 0.32528469   | 1.614131615 | 4.585289198  | 5.74E-06 | 2.596232962 |
| CAPN10        | 0.215494919  | 1.974354849 | 4.584516806  | 5.77E-06 | 2.592835709 |
| TXN           | 0.329037509  | 7.308583836 | 4.582243712  | 5.83E-06 | 2.582840895 |
| ELF3          | 0.368351601  | 5.382968551 | 4.581562288  | 5.84E-06 | 2.579845553 |
| TMEM198       | 0.256049329  | 1.227788925 | 4.5811693    | 5.85E-06 | 2.578118281 |
| ADAMTS14      | -0.273807411 | 1.179618137 | -4.580578918 | 5.87E-06 | 2.57552367  |
| SPOCD1        | -0.295382865 | 1.01681868  | -4.580260953 | 5.88E-06 | 2.574126404 |
| RAB15         | 0.421839159  | 3.587600438 | 4.578768834  | 5.92E-06 | 2.567570623 |
| ULK1          | 0.247004734  | 3.313732126 | 4.577917666  | 5.94E-06 | 2.563831809 |
| CHD1L         | 0.234219138  | 4.305806622 | 4.57765613   | 5.95E-06 | 2.562683125 |
| SPP1          | -0.821786412 | 6.922765232 | -4.577193299 | 5.96E-06 | 2.560650481 |
| AC145343.1    | -0.286943836 | 1.172580833 | -4.577045932 | 5.97E-06 | 2.560003322 |

|               |              |             |              |          |             |
|---------------|--------------|-------------|--------------|----------|-------------|
| SARAF         | -0.212323889 | 6.339309835 | -4.576397397 | 5.98E-06 | 2.55715551  |
| PI4K2B        | 0.221521348  | 3.392502204 | 4.575202348  | 6.02E-06 | 2.551908856 |
| MYL12A        | -0.212694244 | 6.593385436 | -4.574918213 | 6.02E-06 | 2.550661593 |
| COA6          | 0.2843047    | 4.270492986 | 4.573726982  | 6.06E-06 | 2.545433254 |
| KCNMB2-AS1    | 0.383625643  | 0.854190091 | 4.572799224  | 6.08E-06 | 2.541362166 |
| TMEM130       | -0.501631365 | 1.620875145 | -4.572745823 | 6.08E-06 | 2.54112786  |
| SCAND1        | 0.282024224  | 4.39977181  | 4.572375096  | 6.10E-06 | 2.539501306 |
| GJB2          | -0.636997207 | 3.207395012 | -4.572112077 | 6.10E-06 | 2.538347392 |
| FGFR1         | -0.36412021  | 2.346378663 | -4.571094626 | 6.13E-06 | 2.533884213 |
| ECHDC1        | -0.246849827 | 3.465983751 | -4.570927356 | 6.14E-06 | 2.533150548 |
| MAP6          | -0.254125204 | 1.006322013 | -4.567714905 | 6.23E-06 | 2.519065193 |
| VAMP7         | -0.203286437 | 4.251644632 | -4.565304671 | 6.30E-06 | 2.508503224 |
| IGFBP2        | 0.722394507  | 4.368868978 | 4.564736122  | 6.31E-06 | 2.506012511 |
| SAPCD2        | 0.376754552  | 2.217474227 | 4.560975233  | 6.42E-06 | 2.489543912 |
| FSCN1         | -0.517501259 | 4.522881928 | -4.559867425 | 6.45E-06 | 2.4846953   |
| CYP4F3        | 0.498943898  | 0.730268337 | 4.559772884  | 6.46E-06 | 2.484281566 |
| C14orf159     | -0.248201    | 2.56820596  | -4.55949835  | 6.47E-06 | 2.483080188 |
| C7orf55       | 0.250021711  | 2.363662836 | 4.559125941  | 6.48E-06 | 2.481450606 |
| ZWINT         | 0.389663344  | 3.63721335  | 4.55847302   | 6.50E-06 | 2.478593862 |
| EIF5B         | 0.245335882  | 4.361738417 | 4.55834416   | 6.50E-06 | 2.478030101 |
| SSH3          | 0.242418154  | 4.088735499 | 4.556493597  | 6.55E-06 | 2.46993553  |
| SYTL4         | -0.244687125 | 1.478628337 | -4.554146939 | 6.63E-06 | 2.45967533  |
| SLC34A2       | -0.794641227 | 7.905265435 | -4.549750068 | 6.76E-06 | 2.440464147 |
| RNF5          | 0.208647097  | 5.351330389 | 4.549052656  | 6.78E-06 | 2.437418523 |
| CTD-2517O10.6 | 0.215643445  | 1.306976399 | 4.549019287  | 6.78E-06 | 2.437272811 |
| SAMD10        | 0.26226982   | 2.600999057 | 4.548871875  | 6.79E-06 | 2.436629116 |
| LRP11         | 0.271344083  | 4.171627659 | 4.54854376   | 6.80E-06 | 2.435196431 |
| SURF6         | 0.200781489  | 3.183176687 | 4.547987235  | 6.81E-06 | 2.432766622 |
| CHST2         | -0.391452491 | 2.235885571 | -4.547755921 | 6.82E-06 | 2.431756778 |
| TPST1         | -0.263211784 | 3.019550618 | -4.546980862 | 6.85E-06 | 2.428373461 |
| ATP13A4-AS1   | -0.287183741 | 0.467788285 | -4.546871587 | 6.85E-06 | 2.42789649  |
| CACHD1        | -0.420705247 | 1.869398397 | -4.546416303 | 6.86E-06 | 2.42590936  |
| ATF4          | 0.205407613  | 6.666023953 | 4.544692076  | 6.92E-06 | 2.418385455 |

|                |              |             |              |          |             |
|----------------|--------------|-------------|--------------|----------|-------------|
| ATP5EP2        | 0.204762121  | 1.101229959 | 4.543898634  | 6.94E-06 | 2.414924044 |
| RPP25L         | 0.22424297   | 3.988753912 | 4.543773837  | 6.95E-06 | 2.414379662 |
| RPL37A         | 0.232443426  | 6.672635231 | 4.542638967  | 6.98E-06 | 2.409429857 |
| MCM3           | 0.263670309  | 4.783040204 | 4.542189268  | 7.00E-06 | 2.40746878  |
| RP11-728F11.4  | 0.229683619  | 0.461319038 | 4.540259123  | 7.06E-06 | 2.399053705 |
| BTNL10         | 0.230505516  | 0.62624604  | 4.537043778  | 7.16E-06 | 2.385042706 |
| C20orf24       | 0.27720055   | 4.454497    | 4.535038653  | 7.23E-06 | 2.376309919 |
| ABHD11         | 0.316369228  | 4.440292909 | 4.53319367   | 7.29E-06 | 2.368277723 |
| CHST3          | -0.401001679 | 2.092618777 | -4.531359883 | 7.35E-06 | 2.360297251 |
| LZTS1          | -0.246303458 | 1.4796639   | -4.529602892 | 7.41E-06 | 2.352653772 |
| BPIFA2         | 0.585998854  | 1.12887163  | 4.527902652  | 7.47E-06 | 2.345259779 |
| ATP6V0E1       | -0.217235971 | 6.818252943 | -4.527544323 | 7.48E-06 | 2.343701808 |
| NEK6           | -0.225481363 | 4.246737579 | -4.526715354 | 7.51E-06 | 2.34009798  |
| VPS13C         | -0.232003097 | 2.438328424 | -4.52586438  | 7.54E-06 | 2.336399126 |
| GDF10          | -0.344058336 | 0.926153521 | -4.525716211 | 7.54E-06 | 2.335755158 |
| MT1L           | -0.489842993 | 2.505279205 | -4.523650715 | 7.61E-06 | 2.326780172 |
| TUSC8          | 0.285720489  | 0.34503332  | 4.519714065  | 7.75E-06 | 2.309685102 |
| CCDC34         | 0.277385146  | 2.047536218 | 4.519078399  | 7.77E-06 | 2.306925979 |
| KLF4           | -0.442253184 | 2.968487964 | -4.518906404 | 7.78E-06 | 2.306179494 |
| YBEY           | 0.245943367  | 2.626955521 | 4.517114749  | 7.84E-06 | 2.298404975 |
| POLR2K         | 0.227114675  | 4.9029677   | 4.517100587  | 7.84E-06 | 2.298343533 |
| B3GALNT1       | -0.322912906 | 1.973593794 | -4.511847054 | 8.03E-06 | 2.275563336 |
| FASTKD5        | 0.200124876  | 3.039875417 | 4.511359672  | 8.05E-06 | 2.273451205 |
| RPL6P27        | 0.275667112  | 2.820751157 | 4.509612766  | 8.11E-06 | 2.265882492 |
| AC093375.1     | 0.219079667  | 0.62061934  | 4.508340095  | 8.16E-06 | 2.260370168 |
| PDCD6          | 0.225529943  | 3.798276409 | 4.508056197  | 8.17E-06 | 2.259140718 |
| IQCG           | -0.214409097 | 1.423663977 | -4.507316224 | 8.20E-06 | 2.255936514 |
| COL4A2         | -0.400624406 | 5.504900784 | -4.507173228 | 8.20E-06 | 2.255317375 |
| NFKB2          | -0.252087366 | 3.968379095 | -4.506692927 | 8.22E-06 | 2.253237915 |
| LINC00858      | 0.231376273  | 0.420549649 | 4.506648735  | 8.22E-06 | 2.253046593 |
| RP11-284F21.10 | 0.560870922  | 1.633168999 | 4.505169605  | 8.28E-06 | 2.24664405  |
| SURF2          | 0.213155339  | 3.820903484 | 4.505130279  | 8.28E-06 | 2.246473848 |
| RP11-616M22.5  | -0.323988666 | 0.718079209 | -4.502881237 | 8.36E-06 | 2.236742463 |

|            |              |             |              |          |             |
|------------|--------------|-------------|--------------|----------|-------------|
| BATF3      | -0.282460102 | 1.339008398 | -4.500329103 | 8.46E-06 | 2.225705046 |
| PFN2       | 0.534518052  | 4.390804291 | 4.495865647  | 8.63E-06 | 2.206415448 |
| NDRG2      | -0.349193776 | 2.465694833 | -4.495588827 | 8.64E-06 | 2.205219702 |
| CA8        | 0.339770949  | 0.840764983 | 4.495179344  | 8.66E-06 | 2.203451034 |
| TBL1X      | 0.283632539  | 2.82084344  | 4.494861273  | 8.67E-06 | 2.202077302 |
| SERPINB9P1 | -0.302589489 | 1.319903479 | -4.490857381 | 8.83E-06 | 2.18479236  |
| JADE1      | 0.265562311  | 2.435655305 | 4.490093961  | 8.86E-06 | 2.181498263 |
| IGHD4-4    | -0.29032332  | 0.366285006 | -4.489922759 | 8.87E-06 | 2.180759611 |
| C8orf76    | 0.227780693  | 2.299901382 | 4.488572806  | 8.92E-06 | 2.174936136 |
| CHST15     | -0.322050707 | 3.599960951 | -4.487744124 | 8.95E-06 | 2.171362138 |
| AC017060.1 | -0.569845343 | 2.049531343 | -4.486848969 | 8.99E-06 | 2.167502133 |
| FAM43A     | -0.28382185  | 1.946677145 | -4.486506613 | 9.00E-06 | 2.166026043 |
| RIMBP2     | 0.240232377  | 0.289620443 | 4.485422204  | 9.05E-06 | 2.161351235 |
| CBX4       | 0.222474357  | 4.004380546 | 4.484938457  | 9.07E-06 | 2.159266174 |
| POP7       | 0.25410474   | 4.765989866 | 4.483829184  | 9.11E-06 | 2.154485733 |
| PLVAP      | -0.337294981 | 5.10508333  | -4.483778019 | 9.12E-06 | 2.154265262 |
| FOXA3      | 0.513560565  | 1.719094502 | 4.48364704   | 9.12E-06 | 2.153700881 |
| RPRD1A     | 0.227014466  | 2.940138362 | 4.483264752  | 9.14E-06 | 2.152053715 |
| JPH1       | 0.359108943  | 1.712065599 | 4.482427635  | 9.17E-06 | 2.148447278 |
| YBX2       | 0.369029552  | 0.914912386 | 4.482122141  | 9.18E-06 | 2.147131315 |
| ABCF1      | 0.205563753  | 4.56064693  | 4.47757719   | 9.37E-06 | 2.127562989 |
| TDG        | 0.218261102  | 2.579636486 | 4.477193575  | 9.39E-06 | 2.125912169 |
| CDCA3      | 0.29716176   | 1.47421723  | 4.477151016  | 9.39E-06 | 2.125729031 |
| HSF4       | 0.41838642   | 2.0912332   | 4.476769688  | 9.41E-06 | 2.124088196 |
| ATP5G1     | 0.248439481  | 4.32543205  | 4.474727435  | 9.49E-06 | 2.115302685 |
| TUBB4B     | 0.254165271  | 7.174245093 | 4.473874515  | 9.53E-06 | 2.111634626 |
| HSDL1      | 0.212906317  | 3.014834702 | 4.472937922  | 9.57E-06 | 2.107607464 |
| TAF1D      | 0.209507272  | 3.145328588 | 4.472549741  | 9.59E-06 | 2.105938592 |
| CLDN3      | 0.584834633  | 5.763109226 | 4.47101477   | 9.65E-06 | 2.099340738 |
| LAMP3      | -0.562240375 | 4.216788272 | -4.470821739 | 9.66E-06 | 2.098511172 |
| IGHD6-25   | -0.471242553 | 0.998580189 | -4.470646832 | 9.67E-06 | 2.097759518 |
| PPP1R26    | 0.235966133  | 2.904360663 | 4.468836392  | 9.75E-06 | 2.089980879 |
| ECT2       | 0.360519443  | 3.196356922 | 4.466681166  | 9.84E-06 | 2.080724636 |

|               |              |             |              |          |             |
|---------------|--------------|-------------|--------------|----------|-------------|
| NEIL3         | 0.343611527  | 1.124996307 | 4.466317553  | 9.86E-06 | 2.0791634   |
| CNTROB        | 0.221418206  | 2.947180859 | 4.466209214  | 9.87E-06 | 2.078698251 |
| PFDN4         | 0.251459655  | 3.436214357 | 4.465547583  | 9.89E-06 | 2.075857789 |
| RP11-140K17.3 | 0.239750067  | 1.957061738 | 4.465314713  | 9.91E-06 | 2.074858145 |
| BARX1-AS1     | 0.229873212  | 0.299291188 | 4.463872628  | 9.97E-06 | 2.068668741 |
| GNAS          | 0.224095931  | 6.356210604 | 4.463543848  | 9.98E-06 | 2.067257882 |
| NKAIN1        | 0.222396665  | 0.305648194 | 4.463091772  | 1.00E-05 | 2.065318092 |
| TMEM205       | 0.228091947  | 5.33788252  | 4.462981144  | 1.00E-05 | 2.064843428 |
| IGLV5-52      | -0.252227916 | 0.573795573 | -4.461632295 | 1.01E-05 | 2.059056928 |
| CHEK2         | 0.260884696  | 2.111765128 | 4.461559411  | 1.01E-05 | 2.058744306 |
| CDH24         | 0.322781098  | 2.071675997 | 4.461045574  | 1.01E-05 | 2.056540427 |
| CARD14        | 0.312446113  | 0.963770307 | 4.460028986  | 1.01E-05 | 2.052180911 |
| RP11-417L19.6 | 0.212582406  | 1.259202874 | 4.459479505  | 1.02E-05 | 2.049824906 |
| KB-1208A12.3  | 0.220607136  | 1.556861417 | 4.459171116  | 1.02E-05 | 2.048502746 |
| HPN           | 0.54145358   | 3.804632584 | 4.457869224  | 1.02E-05 | 2.042922063 |
| CLK2          | 0.236542486  | 3.851478815 | 4.457356016  | 1.03E-05 | 2.040722565 |
| RALGDS        | -0.212476979 | 3.488336824 | -4.457140839 | 1.03E-05 | 2.039800431 |
| SNORA42       | 0.209577271  | 0.457782926 | 4.4557666    | 1.03E-05 | 2.033912144 |
| SOX18         | -0.277216191 | 2.071958745 | -4.455163975 | 1.04E-05 | 2.031330571 |
| RFC3          | 0.264206428  | 2.499800501 | 4.45494634   | 1.04E-05 | 2.030398326 |
| RP11-21L23.3  | 0.244059452  | 0.787027306 | 4.454548603  | 1.04E-05 | 2.028694721 |
| PALMD         | -0.231817625 | 1.191818167 | -4.451900526 | 1.05E-05 | 2.017355933 |
| MIR3135B      | -0.201950431 | 0.296433007 | -4.451733288 | 1.05E-05 | 2.016640047 |
| DZIP1L        | -0.22553111  | 0.939879995 | -4.448970822 | 1.07E-05 | 2.004818503 |
| NIPSNAP3A     | -0.212270726 | 3.081548735 | -4.448962767 | 1.07E-05 | 2.00478404  |
| CDR2          | -0.224591796 | 3.296794503 | -4.447894296 | 1.07E-05 | 2.00021351  |
| PHB2          | 0.224034131  | 6.096570443 | 4.447709785  | 1.07E-05 | 1.999424344 |
| SPINT1        | 0.292008586  | 6.250914431 | 4.447608913  | 1.07E-05 | 1.998992916 |
| SNHG19        | 0.397067768  | 4.000321386 | 4.447381087  | 1.07E-05 | 1.998018551 |
| LINC00467     | 0.221365514  | 2.016409478 | 4.446616647  | 1.08E-05 | 1.994749522 |
| SLC9A7        | -0.242613075 | 1.933455559 | -4.44500256  | 1.08E-05 | 1.987848798 |
| AC093323.3    | 0.222515819  | 3.111652803 | 4.444876901  | 1.09E-05 | 1.987311663 |
| GMNN          | 0.279651262  | 2.998308038 | 4.44387508   | 1.09E-05 | 1.98302984  |

|               |              |             |              |          |             |
|---------------|--------------|-------------|--------------|----------|-------------|
| FCHSD1        | -0.214982254 | 2.041016581 | -4.442697122 | 1.10E-05 | 1.977996341 |
| ACSL3         | 0.234585804  | 3.963937879 | 4.442256689  | 1.10E-05 | 1.976114657 |
| CCDC120       | 0.231944582  | 2.500060846 | 4.440734781  | 1.11E-05 | 1.969613853 |
| FOXO3         | -0.233491206 | 2.891841153 | -4.440424927 | 1.11E-05 | 1.968290569 |
| TMEM14A       | 0.267100972  | 4.776274162 | 4.438830876  | 1.12E-05 | 1.961484253 |
| KLF11         | -0.236032688 | 2.672487906 | -4.437246148 | 1.12E-05 | 1.954719986 |
| KIAA0101      | 0.346046952  | 2.325694237 | 4.436097465  | 1.13E-05 | 1.949818329 |
| RP11-400N13.3 | -0.218753445 | 0.530660594 | -4.434292635 | 1.14E-05 | 1.942119133 |
| KIF22         | 0.234054711  | 3.638012543 | 4.432281981  | 1.15E-05 | 1.933545322 |
| RP11-291L22.6 | 0.240581833  | 1.375487056 | 4.431935111  | 1.15E-05 | 1.932066565 |
| DCLRE1A       | 0.201574876  | 2.210486162 | 4.430038227  | 1.16E-05 | 1.923981767 |
| S100A9        | -0.787425649 | 7.596394429 | -4.428848125 | 1.17E-05 | 1.91891101  |
| BHLHA15       | 0.439155178  | 1.873588575 | 4.428761359  | 1.17E-05 | 1.918541369 |
| HSD17B7       | 0.203217671  | 2.093073894 | 4.427391391  | 1.17E-05 | 1.912705908 |
| SLC22A23      | 0.365327469  | 2.581162934 | 4.42416971   | 1.19E-05 | 1.898989541 |
| BCL9          | 0.262710287  | 3.153741528 | 4.421895597  | 1.20E-05 | 1.889313018 |
| RP11-156K13.1 | 0.338344848  | 0.911899842 | 4.42170333   | 1.20E-05 | 1.888495119 |
| CCDC28A       | -0.216112324 | 4.005002778 | -4.421560037 | 1.20E-05 | 1.887885571 |
| ACACA         | 0.217241027  | 3.001195313 | 4.421316747  | 1.21E-05 | 1.8868507   |
| TRAF2         | 0.253347437  | 3.236856526 | 4.421190002  | 1.21E-05 | 1.886311592 |
| SLC25A21      | 0.206932595  | 0.397680706 | 4.420670495  | 1.21E-05 | 1.88410202  |
| C17orf53      | 0.28852304   | 1.566870351 | 4.420643172  | 1.21E-05 | 1.883985814 |
| MRPL47        | 0.225523019  | 4.519964108 | 4.420332801  | 1.21E-05 | 1.882665866 |
| MRPL57        | 0.21104884   | 4.181874267 | 4.420228237  | 1.21E-05 | 1.882221194 |
| MRPS25        | 0.277562603  | 3.424253197 | 4.419300169  | 1.22E-05 | 1.878274892 |
| BRI3BP        | 0.240049721  | 2.489630886 | 4.419025631  | 1.22E-05 | 1.877107656 |
| PAIP1         | 0.217514862  | 4.355908454 | 4.41838594   | 1.22E-05 | 1.874388181 |
| CELSR2        | 0.242735889  | 1.51040471  | 4.418053241  | 1.22E-05 | 1.872973944 |
| IGHD          | -0.944535989 | 4.046720888 | -4.417246662 | 1.23E-05 | 1.869545748 |
| MVD           | 0.249117725  | 3.143911925 | 4.416853633  | 1.23E-05 | 1.867875471 |
| CRNDE         | 0.379957533  | 2.909952388 | 4.416516476  | 1.23E-05 | 1.866442748 |
| FSCN2         | 0.225984206  | 0.963812076 | 4.416373097  | 1.23E-05 | 1.865833497 |
| NPTXR         | -0.33784308  | 1.3462618   | -4.415606    | 1.24E-05 | 1.862574246 |



|                |              |             |              |          |             |
|----------------|--------------|-------------|--------------|----------|-------------|
| ATP5B          | 0.215647163  | 7.659261055 | 4.41471267   | 1.24E-05 | 1.858779309 |
| ACADVL         | 0.24359486   | 5.574554116 | 4.414539297  | 1.24E-05 | 1.858042892 |
| HS6ST1         | 0.28018502   | 3.233007632 | 4.414478408  | 1.24E-05 | 1.857784266 |
| RP11-672L10.6  | 0.225938298  | 1.068335541 | 4.414259201  | 1.24E-05 | 1.856853213 |
| LINC00493      | 0.215030272  | 4.506538955 | 4.413162114  | 1.25E-05 | 1.852194116 |
| FAAH2          | 0.283078022  | 2.953845774 | 4.412931596  | 1.25E-05 | 1.851215292 |
| EPHA3          | -0.297927764 | 0.859603769 | -4.411161653 | 1.26E-05 | 1.84370134  |
| GJA1           | -0.481108251 | 4.77396588  | -4.410285597 | 1.27E-05 | 1.839983243 |
| DUSP5          | -0.407959283 | 3.947555332 | -4.408913065 | 1.27E-05 | 1.83415941  |
| ABR            | -0.23499111  | 3.444617107 | -4.408812371 | 1.27E-05 | 1.833732221 |
| AFAP1          | -0.226181865 | 2.544285585 | -4.408421232 | 1.28E-05 | 1.832072908 |
| CEP170B        | 0.273244626  | 3.633520754 | 4.408333572  | 1.28E-05 | 1.831701051 |
| TFPI           | -0.490881527 | 3.573730315 | -4.408097272 | 1.28E-05 | 1.830698689 |
| TEP1           | -0.211580978 | 2.423496691 | -4.407437062 | 1.28E-05 | 1.827898408 |
| HHIP-AS1       | -0.413447651 | 1.269530591 | -4.407201595 | 1.28E-05 | 1.82689977  |
| RP11-1038A11.3 | 0.266806338  | 0.515955181 | 4.406589204  | 1.29E-05 | 1.824302785 |
| STEAP3         | -0.359731032 | 4.062406329 | -4.402901684 | 1.31E-05 | 1.808672084 |
| FAM195A        | 0.266805822  | 2.788237058 | 4.397000837  | 1.34E-05 | 1.783684676 |
| C9orf173       | 0.205920051  | 0.511727355 | 4.39609052   | 1.35E-05 | 1.77983266  |
| FCN3           | -0.474228185 | 1.937855721 | -4.394098552 | 1.36E-05 | 1.771406192 |
| PPP1R9B        | -0.211094736 | 4.411088162 | -4.393883146 | 1.36E-05 | 1.770495189 |
| CFI            | -0.418662793 | 4.128822851 | -4.393729162 | 1.36E-05 | 1.769843976 |
| ADAMTS4        | -0.332649665 | 1.477107514 | -4.39317862  | 1.37E-05 | 1.767515865 |
| TWSG1          | -0.262373312 | 3.626354952 | -4.392513794 | 1.37E-05 | 1.764704837 |
| SIDT1          | -0.263878297 | 1.319841037 | -4.391921893 | 1.37E-05 | 1.76220248  |
| MGAT3          | -0.330396252 | 1.086064589 | -4.39158878  | 1.38E-05 | 1.760794327 |
| RHPN1          | 0.394327126  | 3.082354634 | 4.389949591  | 1.39E-05 | 1.753866506 |
| TMEM176A       | -0.445877667 | 4.170295592 | -4.389076652 | 1.39E-05 | 1.750178119 |
| PLA2G2A        | -0.537291812 | 1.348501443 | -4.388237926 | 1.40E-05 | 1.746634928 |
| SORD           | 0.249188957  | 2.25650425  | 4.387952756  | 1.40E-05 | 1.745430372 |
| ARHGEF10L      | -0.242798063 | 2.648490365 | -4.385929058 | 1.41E-05 | 1.736884375 |
| RP11-420A23.1  | 0.204040258  | 0.787673114 | 4.38464167   | 1.42E-05 | 1.731449684 |
| WDR43          | 0.207031413  | 3.697402742 | 4.383891219  | 1.42E-05 | 1.728282347 |

|                |              |             |              |          |             |
|----------------|--------------|-------------|--------------|----------|-------------|
| STOML2         | 0.230185702  | 5.469117337 | 4.382069845  | 1.44E-05 | 1.720597178 |
| G6PD           | 0.497823261  | 5.058098416 | 4.380214819  | 1.45E-05 | 1.712773057 |
| AC019117.2     | -0.599806566 | 2.430285008 | -4.379359201 | 1.45E-05 | 1.709165268 |
| CTD-2527I21.15 | 0.272955986  | 0.741546792 | 4.37888441   | 1.46E-05 | 1.707163551 |
| NME1           | 0.300670554  | 4.140202271 | 4.378878447  | 1.46E-05 | 1.70713841  |
| HSD17B14       | -0.404087303 | 3.1794143   | -4.377426474 | 1.46E-05 | 1.701018151 |
| CNN2           | -0.248067208 | 5.91642872  | -4.376595452 | 1.47E-05 | 1.697516132 |
| CALCB          | 0.227580819  | 0.215974765 | 4.375964962  | 1.47E-05 | 1.694859585 |
| AC079922.2     | 0.267623858  | 2.130693059 | 4.375806518  | 1.48E-05 | 1.694192039 |
| RAC3           | 0.425658178  | 3.079706133 | 4.373802511  | 1.49E-05 | 1.685750867 |
| RASA1          | -0.230817701 | 3.115471208 | -4.373505191 | 1.49E-05 | 1.684498816 |
| ADAMTS15       | -0.230772613 | 0.80584651  | -4.371930981 | 1.50E-05 | 1.677870936 |
| RP11-443P15.2  | 0.477396195  | 0.935462984 | 4.370005683  | 1.51E-05 | 1.669767878 |
| GRK5           | -0.270787453 | 1.891163994 | -4.369865876 | 1.51E-05 | 1.669179594 |
| POGZ           | 0.223079104  | 3.355513865 | 4.36915668   | 1.52E-05 | 1.666195703 |
| PLAT           | -0.627685802 | 3.539685106 | -4.368825332 | 1.52E-05 | 1.664801732 |
| RGS4           | -0.265535149 | 0.906300941 | -4.367249705 | 1.53E-05 | 1.65817446  |
| FCHO1          | -0.262698638 | 1.675781532 | -4.367177787 | 1.53E-05 | 1.657872019 |
| RAB17          | 0.289827793  | 2.927370479 | 4.367033007  | 1.53E-05 | 1.657263177 |
| C5orf22        | 0.205468901  | 3.25491178  | 4.366355315  | 1.54E-05 | 1.654413535 |
| HUNK           | 0.266277398  | 0.934954705 | 4.364093442  | 1.55E-05 | 1.644905509 |
| DDX11          | 0.26641314   | 1.973562877 | 4.361781703  | 1.57E-05 | 1.635192576 |
| CDH15          | 0.281883242  | 0.845834943 | 4.359824966  | 1.58E-05 | 1.626974934 |
| PNN            | 0.268160362  | 4.497425967 | 4.356846937  | 1.60E-05 | 1.614474762 |
| FAM64A         | 0.334777655  | 1.545732619 | 4.351269846  | 1.64E-05 | 1.591086395 |
| FLJ22447       | -0.352789278 | 0.538722856 | -4.350497685 | 1.65E-05 | 1.58785041  |
| SIGMAR1        | 0.208447117  | 4.785768885 | 4.350359225  | 1.65E-05 | 1.587270207 |
| AC019117.1     | -0.378773635 | 0.858018804 | -4.350153232 | 1.65E-05 | 1.586407044 |
| EPS8L2         | 0.296820623  | 4.424678759 | 4.349754436  | 1.65E-05 | 1.584736095 |
| C15orf48       | -0.656580193 | 4.619107702 | -4.348440588 | 1.66E-05 | 1.579232093 |
| RCN3           | -0.451711235 | 4.068291918 | -4.342637564 | 1.71E-05 | 1.55494036  |
| HBB            | -0.711633271 | 3.948470574 | -4.341706458 | 1.71E-05 | 1.551045509 |
| MESP1          | 0.303629753  | 1.348561247 | 4.341640199  | 1.71E-05 | 1.550768371 |

|               |              |             |              |          |             |
|---------------|--------------|-------------|--------------|----------|-------------|
| CDC42EP1      | -0.423104923 | 5.387636254 | -4.340205999 | 1.73E-05 | 1.544770656 |
| PRKAA2        | 0.273145338  | 1.159984847 | 4.338978973  | 1.73E-05 | 1.53964078  |
| FGA           | 1.134596256  | 2.833417141 | 4.337337298  | 1.75E-05 | 1.532779471 |
| ERH           | 0.207593524  | 6.057779643 | 4.337225515  | 1.75E-05 | 1.532312365 |
| AL450992.2    | 0.412638209  | 3.154515947 | 4.33586228   | 1.76E-05 | 1.526616749 |
| ZNF793-AS1    | 0.249101388  | 0.964273466 | 4.335560092  | 1.76E-05 | 1.525354423 |
| IGHV3-64      | -0.643917188 | 2.237236671 | -4.335105491 | 1.76E-05 | 1.523455585 |
| C8G           | 0.271945219  | 0.80167471  | 4.334435607  | 1.77E-05 | 1.520657861 |
| ADA           | -0.27243424  | 1.9775355   | -4.334254562 | 1.77E-05 | 1.519901808 |
| CTD-2124B8.2  | 0.240614799  | 1.89201573  | 4.331695543  | 1.79E-05 | 1.509218343 |
| LSM2          | 0.243722375  | 5.16561224  | 4.331102178  | 1.80E-05 | 1.506741979 |
| FECH          | 0.239457239  | 2.8737891   | 4.330299583  | 1.80E-05 | 1.503392913 |
| CXCL16        | -0.298455808 | 5.56359561  | -4.329877156 | 1.81E-05 | 1.501630441 |
| RP11-126L15.4 | 0.2205154    | 1.066786893 | 4.329055058  | 1.81E-05 | 1.498200901 |
| CBL           | -0.201311547 | 2.086067599 | -4.328064806 | 1.82E-05 | 1.494070674 |
| DNMT3B        | 0.268758934  | 1.185458261 | 4.328017099  | 1.82E-05 | 1.493871716 |
| KRT8          | 0.340876791  | 7.642619326 | 4.327943529  | 1.82E-05 | 1.493564903 |
| SERPINA1      | -0.686135903 | 6.784842496 | -4.327460878 | 1.82E-05 | 1.491552192 |
| CYBA          | -0.352353404 | 5.398905478 | -4.32681392  | 1.83E-05 | 1.488854626 |
| GAREM         | 0.24942553   | 1.972962285 | 4.326637549  | 1.83E-05 | 1.488119293 |
| GPR162        | -0.261042799 | 1.156880419 | -4.326514699 | 1.83E-05 | 1.487607115 |
| SKA1          | 0.30654224   | 1.432224078 | 4.326138526  | 1.84E-05 | 1.486038892 |
| RP11-101E13.5 | 0.214534798  | 3.869970268 | 4.325351488  | 1.84E-05 | 1.482758226 |
| ALOX12P2      | 0.208705071  | 0.602713416 | 4.324979578  | 1.84E-05 | 1.481208159 |
| C20orf85      | -0.735662492 | 1.84963831  | -4.324810118 | 1.85E-05 | 1.48050192  |
| COMTD1        | 0.332549642  | 3.031386027 | 4.324196033  | 1.85E-05 | 1.477942864 |
| HOOK2         | 0.242286139  | 2.923045382 | 4.32217004   | 1.87E-05 | 1.469502418 |
| CATSPER1      | -0.282324857 | 0.878478628 | -4.321855719 | 1.87E-05 | 1.468193259 |
| AC079630.2    | -0.342677067 | 0.685056677 | -4.321445517 | 1.87E-05 | 1.466484886 |
| FNIP2         | -0.323017381 | 2.76369739  | -4.320994899 | 1.88E-05 | 1.464608367 |
| SLC19A2       | 0.254098368  | 3.149648895 | 4.320571258  | 1.88E-05 | 1.462844351 |
| UFSP1         | 0.21365986   | 1.460894881 | 4.320413031  | 1.88E-05 | 1.462185545 |
| MAFG-AS1      | 0.255428759  | 2.128606082 | 4.318826998  | 1.89E-05 | 1.455583054 |

|               |              |             |              |          |             |
|---------------|--------------|-------------|--------------|----------|-------------|
| ANXA2         | -0.307264814 | 6.538442989 | -4.318097163 | 1.90E-05 | 1.452545584 |
| ARL4C         | -0.337032156 | 4.480488959 | -4.317674075 | 1.90E-05 | 1.450784968 |
| CHAF1B        | 0.233911875  | 1.801276442 | 4.315169405  | 1.93E-05 | 1.440365444 |
| FHL2          | -0.424869261 | 3.128321062 | -4.314918754 | 1.93E-05 | 1.439323039 |
| BCL10         | -0.225172295 | 3.495203359 | -4.313675485 | 1.94E-05 | 1.434153352 |
| LIMK1         | -0.277905055 | 3.822174676 | -4.313119606 | 1.94E-05 | 1.431842379 |
| PLXNB1        | 0.310107001  | 3.116558449 | 4.312571912  | 1.95E-05 | 1.429565702 |
| MMP15         | 0.368633632  | 4.368328256 | 4.311857803  | 1.95E-05 | 1.426597666 |
| DUSP7         | -0.231169221 | 2.606243413 | -4.310948644 | 1.96E-05 | 1.422819611 |
| PLA2G4A       | 0.608595177  | 3.551952837 | 4.310758567  | 1.96E-05 | 1.422029832 |
| AKR1C4        | 0.337930945  | 0.377675678 | 4.310353418  | 1.97E-05 | 1.420346519 |
| C4A           | -0.3474835   | 1.578153072 | -4.309905593 | 1.97E-05 | 1.41848607  |
| IL1A          | -0.285806192 | 0.596255216 | -4.309598464 | 1.97E-05 | 1.417210233 |
| ERBB3         | 0.344522294  | 4.841498958 | 4.309277363  | 1.98E-05 | 1.415876448 |
| TRIM24        | 0.228851263  | 2.723610495 | 4.308315807  | 1.98E-05 | 1.411882892 |
| IGSF10        | -0.214425192 | 0.556787255 | -4.307901932 | 1.99E-05 | 1.410164236 |
| PPAPDC1B      | 0.268629187  | 3.77628357  | 4.307778707  | 1.99E-05 | 1.409652561 |
| IGHD3-10      | -0.385001729 | 0.715019803 | -4.306169237 | 2.00E-05 | 1.402970701 |
| NOTCH4        | -0.224924188 | 1.709256761 | -4.304549791 | 2.02E-05 | 1.396249766 |
| RAP2A         | -0.213415437 | 3.163597019 | -4.302577452 | 2.03E-05 | 1.388067437 |
| AB019441.29   | 0.246436044  | 2.265871694 | 4.302217943  | 2.04E-05 | 1.386576375 |
| RP11-660L16.2 | 0.293458917  | 2.390825059 | 4.302157936  | 2.04E-05 | 1.386327509 |
| ROMO1         | 0.283542714  | 6.252546148 | 4.301385252  | 2.04E-05 | 1.383123237 |
| ZNF428        | 0.228341517  | 3.674073637 | 4.298695927  | 2.07E-05 | 1.371974941 |
| INPP4B        | -0.272567456 | 1.511820674 | -4.29811291  | 2.07E-05 | 1.369558963 |
| AC005336.4    | 0.362705471  | 0.583799648 | 4.297717435  | 2.08E-05 | 1.367920318 |
| PCNA          | 0.282573621  | 5.840554002 | 4.297505138  | 2.08E-05 | 1.367040729 |
| TNFRSF12A     | -0.435882511 | 5.287012329 | -4.294064376 | 2.11E-05 | 1.35279054  |
| MIR221        | -0.278660788 | 0.87195932  | -4.292946447 | 2.12E-05 | 1.348162826 |
| RSPH4A        | -0.370106527 | 0.9359168   | -4.292804556 | 2.12E-05 | 1.347575543 |
| PDRG1         | 0.201841753  | 3.531828899 | 4.292582123  | 2.12E-05 | 1.346654935 |
| RP11-663N22.1 | 0.227046962  | 0.414779969 | 4.290944602  | 2.14E-05 | 1.339878906 |
| RP11-132F7.2  | 0.331800126  | 1.192163642 | 4.290797724  | 2.14E-05 | 1.339271243 |

|               |              |             |              |          |             |
|---------------|--------------|-------------|--------------|----------|-------------|
| TTC32         | 0.228565993  | 1.970051888 | 4.290623409  | 2.14E-05 | 1.338550096 |
| NRN1          | -0.363500649 | 1.809803329 | -4.290535103 | 2.14E-05 | 1.338184782 |
| PER3          | -0.309521426 | 1.940771515 | -4.290157448 | 2.15E-05 | 1.33662253  |
| RNU6-529P     | -0.21269444  | 1.062459604 | -4.289161999 | 2.16E-05 | 1.332505257 |
| RNU7-75P      | 0.27054897   | 0.725906072 | 4.288575089  | 2.16E-05 | 1.330078157 |
| SNRPG         | 0.250952753  | 4.607895762 | 4.288520658  | 2.16E-05 | 1.329853077 |
| UBE2S         | 0.355368226  | 2.792550016 | 4.287529143  | 2.17E-05 | 1.325753529 |
| RP11-977G19.5 | 0.279485387  | 3.035031805 | 4.286950442  | 2.18E-05 | 1.323361217 |
| DNAJB9        | -0.255488545 | 4.358434636 | -4.283616106 | 2.21E-05 | 1.309583145 |
| KIAA0907      | 0.258909961  | 3.385313109 | 4.28283241   | 2.22E-05 | 1.306346218 |
| PCYT2         | 0.210947135  | 2.767573702 | 4.282673669  | 2.22E-05 | 1.305690629 |
| VDAC3         | 0.25242707   | 4.824741061 | 4.28199045   | 2.22E-05 | 1.302869253 |
| GRAMD4        | 0.29466044   | 3.87799671  | 4.281164805  | 2.23E-05 | 1.299460278 |
| SH3RF2        | -0.35168317  | 1.245973783 | -4.278993075 | 2.25E-05 | 1.290496423 |
| ANXA3         | -0.396238027 | 3.251097211 | -4.278335728 | 2.26E-05 | 1.287784042 |
| AGER          | -0.736797848 | 3.747498668 | -4.276039129 | 2.28E-05 | 1.278310733 |
| RBL2          | -0.217663623 | 3.597512991 | -4.275891602 | 2.28E-05 | 1.277702358 |
| WDR18         | 0.219964384  | 3.688406919 | 4.273634471  | 2.31E-05 | 1.268396756 |
| FAM24B        | 0.208437938  | 1.262572685 | 4.27335637   | 2.31E-05 | 1.26725053  |
| TMEM243       | -0.291381234 | 3.213201368 | -4.272992772 | 2.31E-05 | 1.265752019 |
| FKBP4         | 0.299552185  | 4.442977735 | 4.271561541  | 2.33E-05 | 1.259854588 |
| GPR4          | -0.209820216 | 1.613432939 | -4.271160249 | 2.33E-05 | 1.258201384 |
| CBFA2T2       | 0.205906168  | 2.300410239 | 4.270896979  | 2.33E-05 | 1.257116866 |
| H2AFX         | 0.286926736  | 4.725373882 | 4.270281931  | 2.34E-05 | 1.254583472 |
| FAM166B       | -0.363064122 | 1.02943398  | -4.270155875 | 2.34E-05 | 1.254064285 |
| ETHE1         | -0.281212464 | 3.924101301 | -4.269140115 | 2.35E-05 | 1.24988121  |
| MARCKSL1      | 0.338290063  | 6.795213779 | 4.268997112  | 2.35E-05 | 1.249292374 |
| PRRC2A        | 0.225829705  | 5.150461871 | 4.267980526  | 2.36E-05 | 1.245106951 |
| TOMM20        | 0.203573809  | 6.124440069 | 4.264253183  | 2.40E-05 | 1.229768897 |
| ANXA2R        | -0.231628076 | 1.349432545 | -4.263374146 | 2.41E-05 | 1.226153465 |
| FANCA         | 0.206957386  | 1.368194867 | 4.263349206  | 2.41E-05 | 1.226050901 |
| LRRC26        | 0.270544542  | 0.44062595  | 4.263156531  | 2.41E-05 | 1.225258534 |
| TNIK          | -0.335219853 | 1.781329899 | -4.263063118 | 2.41E-05 | 1.224874389 |

|               |              |             |              |          |             |
|---------------|--------------|-------------|--------------|----------|-------------|
| HIPK1         | -0.206944834 | 3.281122797 | -4.263034541 | 2.41E-05 | 1.224756876 |
| PCK1          | 0.245922245  | 0.208382327 | 4.263010179  | 2.41E-05 | 1.224656691 |
| MMP28         | -0.617729108 | 2.480343267 | -4.262631883 | 2.42E-05 | 1.223101119 |
| SRGAP3-AS2    | -0.413647712 | 0.743815153 | -4.26231796  | 2.42E-05 | 1.221810347 |
| GAL3ST1       | 0.298418901  | 1.208771899 | 4.262224449  | 2.42E-05 | 1.221425869 |
| TEKT1         | -0.368632407 | 0.700664114 | -4.262209215 | 2.42E-05 | 1.221363236 |
| MRPL13        | 0.240917478  | 3.219873194 | 4.26002452   | 2.45E-05 | 1.212382987 |
| CTA-398F10.2  | 0.208300007  | 0.603906947 | 4.258529489  | 2.46E-05 | 1.206240087 |
| XPOT          | 0.245559502  | 3.894035054 | 4.258476233  | 2.46E-05 | 1.206021299 |
| CROT          | -0.201201502 | 1.961364168 | -4.258172346 | 2.47E-05 | 1.204772925 |
| SNED1         | -0.25151053  | 1.744139925 | -4.257222167 | 2.48E-05 | 1.200870098 |
| GSTO2         | 0.248577612  | 1.194654251 | 4.257075133  | 2.48E-05 | 1.200266235 |
| STRA13        | 0.287182996  | 4.708225129 | 4.256645257  | 2.48E-05 | 1.198500858 |
| PRKAB1        | 0.236603865  | 3.575901783 | 4.255624078  | 2.49E-05 | 1.194307837 |
| MIR22HG       | -0.244306543 | 2.806769786 | -4.252744468 | 2.52E-05 | 1.182489017 |
| ADAMTS9       | -0.226461025 | 1.18459157  | -4.249143323 | 2.56E-05 | 1.16771926  |
| CH507-42P11.8 | 0.420967603  | 2.035654249 | 4.24867263   | 2.57E-05 | 1.165789619 |
| FAM84A        | 0.378768049  | 1.485441158 | 4.247615206  | 2.58E-05 | 1.16145535  |
| TRIM47        | -0.298170781 | 3.922782128 | -4.24706326  | 2.59E-05 | 1.15919338  |
| CRLF1         | 0.921985555  | 3.330101306 | 4.246737074  | 2.59E-05 | 1.157856739 |
| NINJ1         | -0.236469018 | 4.612844605 | -4.245987584 | 2.60E-05 | 1.15478586  |
| HIF1A         | -0.281059939 | 5.41699783  | -4.245575938 | 2.60E-05 | 1.153099439 |
| RP11-48B3.4   | 0.216007249  | 1.019181712 | 4.245394978  | 2.60E-05 | 1.152358132 |
| PDCD11        | 0.2002287    | 3.091377176 | 4.244342535  | 2.62E-05 | 1.148047371 |
| PRRG2         | 0.228631653  | 2.820707446 | 4.243793634  | 2.62E-05 | 1.145799492 |
| SPON2         | -0.39042597  | 2.811656235 | -4.240681078 | 2.66E-05 | 1.133057949 |
| PSMD11        | 0.202130894  | 4.191428435 | 4.239666892  | 2.67E-05 | 1.12890816  |
| PRC1          | 0.337871928  | 2.625283667 | 4.237678065  | 2.69E-05 | 1.120773073 |
| DPP4          | -0.638334741 | 4.039357705 | -4.237272227 | 2.70E-05 | 1.119113471 |
| KIAA0895L     | 0.28385899   | 2.230754675 | 4.236745719  | 2.70E-05 | 1.116960632 |
| HCAR1         | 0.400649925  | 1.284888537 | 4.236687587  | 2.70E-05 | 1.116722949 |
| SNX9          | -0.205837075 | 3.963162957 | -4.235307898 | 2.72E-05 | 1.11108279  |
| HSD17B6       | -0.533093584 | 2.666180255 | -4.233367796 | 2.74E-05 | 1.103154551 |

|               |              |             |              |          |             |
|---------------|--------------|-------------|--------------|----------|-------------|
| CEBPA         | -0.427572947 | 2.959695789 | -4.232557815 | 2.75E-05 | 1.099845562 |
| CCDC146       | -0.283142304 | 1.272840449 | -4.231681341 | 2.76E-05 | 1.096265591 |
| SEPHS2        | 0.252236529  | 5.375548401 | 4.227709444  | 2.81E-05 | 1.080050971 |
| SNHG1         | 0.297568676  | 3.36177299  | 4.226244317  | 2.83E-05 | 1.074073404 |
| UCHL1         | 0.799951155  | 3.402531241 | 4.225565027  | 2.84E-05 | 1.071302625 |
| CACNB3        | 0.268788509  | 2.578233237 | 4.222800962  | 2.87E-05 | 1.060032465 |
| TMED2         | 0.216079642  | 6.654627567 | 4.222750524  | 2.87E-05 | 1.059826876 |
| FOXA1         | 0.428442269  | 4.105534492 | 4.221473307  | 2.89E-05 | 1.054621541 |
| RHBDL1        | 0.351676863  | 1.715243009 | 4.220261234  | 2.90E-05 | 1.049683064 |
| RP11-494O16.3 | -0.293859093 | 1.054509745 | -4.219780535 | 2.91E-05 | 1.047724864 |
| BUB1B         | 0.330871021  | 1.953472976 | 4.218887234  | 2.92E-05 | 1.044086424 |
| FAR2          | -0.247847644 | 1.23784519  | -4.217258383 | 2.94E-05 | 1.037453909 |
| RASL11A       | -0.376538806 | 2.564070362 | -4.212509096 | 3.00E-05 | 1.018128905 |
| POLR3GL       | -0.209575546 | 3.99942438  | -4.211957444 | 3.01E-05 | 1.015885529 |
| GNRH2         | 0.214558864  | 0.264343716 | 4.21099595   | 3.02E-05 | 1.011976125 |
| SMPD1         | -0.217913588 | 3.980828791 | -4.210757617 | 3.02E-05 | 1.011007199 |
| VMO1          | -0.379807384 | 2.480331044 | -4.209404261 | 3.04E-05 | 1.005506189 |
| TUBA4B        | -0.329937732 | 0.675864119 | -4.208487123 | 3.05E-05 | 1.001779221 |
| NUDT19        | 0.222322986  | 3.304962282 | 4.207231057  | 3.07E-05 | 0.996676178 |
| SNHG7         | 0.277499964  | 2.883601994 | 4.205630069  | 3.09E-05 | 0.990173867 |
| RP11-130L8.2  | 0.260257733  | 0.865963893 | 4.205256364  | 3.09E-05 | 0.988656423 |
| ELMO3         | 0.303022863  | 4.109916574 | 4.204825714  | 3.10E-05 | 0.986907904 |
| RP11-504P24.8 | 0.294947296  | 1.847177468 | 4.203696617  | 3.11E-05 | 0.982324351 |
| PROC          | 0.377605251  | 1.034804147 | 4.202814344  | 3.13E-05 | 0.978743575 |
| MTA1          | 0.2220639    | 3.099240975 | 4.201991606  | 3.14E-05 | 0.975405057 |
| CD47          | -0.281463128 | 4.873362912 | -4.201136799 | 3.15E-05 | 0.971937056 |
| ARHGAP23      | -0.27068021  | 2.474938801 | -4.20061391  | 3.16E-05 | 0.969815989 |
| SRCIN1        | 0.254824774  | 1.150040643 | 4.200220458  | 3.16E-05 | 0.968220136 |
| BSPRY         | 0.287854812  | 3.87293543  | 4.199698719  | 3.17E-05 | 0.966104163 |
| FAM168B       | 0.204523186  | 4.390550047 | 4.197679829  | 3.20E-05 | 0.957918626 |
| RP11-51F16.1  | -0.283324152 | 1.338200779 | -4.197137916 | 3.20E-05 | 0.955722075 |
| AUNIP         | 0.225988651  | 1.02919656  | 4.194338207  | 3.24E-05 | 0.94437816  |
| CEP72         | 0.211937583  | 1.683449563 | 4.193182968  | 3.26E-05 | 0.939699392 |

|               |              |             |              |          |             |
|---------------|--------------|-------------|--------------|----------|-------------|
| CTD-2134A5.3  | 0.258358935  | 1.507503104 | 4.192748672  | 3.26E-05 | 0.937940787 |
| CDIP1         | -0.254259461 | 2.942827489 | -4.19122659  | 3.28E-05 | 0.931778719 |
| NPM3          | 0.264793781  | 4.580040112 | 4.191002068  | 3.29E-05 | 0.93086993  |
| RP5-1119A7.14 | 0.265109609  | 0.52210172  | 4.189749577  | 3.31E-05 | 0.925801104 |
| RP11-329L6.2  | 0.281496105  | 1.512120912 | 4.189696891  | 3.31E-05 | 0.925587917 |
| RP11-476D10.1 | -0.298384143 | 0.552629471 | -4.188896222 | 3.32E-05 | 0.922348391 |
| CTSV          | 0.357084722  | 1.215158739 | 4.187926574  | 3.33E-05 | 0.91842594  |
| ZMYND8        | 0.205710771  | 3.301295461 | 4.186800883  | 3.35E-05 | 0.913873323 |
| PLA2G10       | 0.516470594  | 1.811125391 | 4.18517182   | 3.37E-05 | 0.907286948 |
| APOO          | 0.212575758  | 3.453927053 | 4.183875555  | 3.39E-05 | 0.902047794 |
| NHS           | -0.270014014 | 1.266581634 | -4.183394611 | 3.40E-05 | 0.900104332 |
| C20orf96      | 0.269207901  | 2.870851593 | 4.180499597  | 3.44E-05 | 0.88841018  |
| RP11-164P12.5 | 0.262624236  | 2.718182421 | 4.179576249  | 3.45E-05 | 0.884681984 |
| PPP2R1B       | 0.229995745  | 2.755911537 | 4.179464866  | 3.45E-05 | 0.884232306 |
| LMTK2         | 0.219220994  | 2.885309362 | 4.179130762  | 3.46E-05 | 0.882883519 |
| FAM83F        | 0.243583974  | 0.560923596 | 4.179112545  | 3.46E-05 | 0.882809979 |
| RP11-649A18.5 | 0.243210916  | 1.152543412 | 4.178310331  | 3.47E-05 | 0.879571842 |
| CTD-2256P15.2 | 0.249136569  | 1.500791462 | 4.177921287  | 3.48E-05 | 0.878001679 |
| DROSHA        | 0.217283673  | 3.266622817 | 4.177045313  | 3.49E-05 | 0.874466776 |
| AMIGO2        | -0.468999187 | 3.824687081 | -4.175709518 | 3.51E-05 | 0.869077649 |
| NUDT14        | 0.274091119  | 3.817871059 | 4.175065443  | 3.52E-05 | 0.866479769 |
| AC124789.1    | -0.223426318 | 0.484573449 | -4.173556039 | 3.54E-05 | 0.860393042 |
| RP11-717A5.2  | -0.247805937 | 0.979709683 | -4.171546143 | 3.57E-05 | 0.852291246 |
| KIFC2         | 0.352804012  | 2.263626303 | 4.1714993    | 3.57E-05 | 0.852102468 |
| BMP3          | -0.517753898 | 1.956188328 | -4.169405997 | 3.60E-05 | 0.843668418 |
| CUL7          | 0.21676707   | 3.760052057 | 4.169224408  | 3.61E-05 | 0.842936973 |
| ERICH5        | 0.410431656  | 1.603728576 | 4.167966824  | 3.63E-05 | 0.83787219  |
| CIT           | 0.519566537  | 2.866961343 | 4.167391739  | 3.63E-05 | 0.835556574 |
| ARID5B        | -0.217411744 | 3.037868661 | -4.16540992  | 3.67E-05 | 0.827578933 |
| PTPLAD1       | 0.209367657  | 4.189080883 | 4.165320365  | 3.67E-05 | 0.827218523 |
| VAT1          | -0.24361151  | 5.795313283 | -4.162688119 | 3.71E-05 | 0.816628327 |
| FAM177A1      | 0.269176988  | 3.427568132 | 4.161848291  | 3.72E-05 | 0.8132508   |
| SERPIND1      | -0.598996652 | 1.466603314 | -4.161645263 | 3.72E-05 | 0.812434378 |



|               |              |             |              |          |             |
|---------------|--------------|-------------|--------------|----------|-------------|
| MGLL          | -0.374165912 | 4.17194856  | -4.160066145 | 3.75E-05 | 0.806085664 |
| RP11-498C9.12 | 0.205865066  | 0.626530018 | 4.159958972  | 3.75E-05 | 0.805654866 |
| DLGAP1-AS1    | 0.287334075  | 2.335008622 | 4.159806204  | 3.75E-05 | 0.805040808 |
| LIPG          | -0.20682006  | 0.777574047 | -4.159159625 | 3.76E-05 | 0.80244209  |
| C10orf107     | -0.325458192 | 0.923007559 | -4.159029829 | 3.77E-05 | 0.801920463 |
| TTC29         | -0.208265018 | 0.336376339 | -4.15694579  | 3.80E-05 | 0.79354714  |
| NSUN7         | 0.20807764   | 1.745363295 | 4.156602869  | 3.80E-05 | 0.792169718 |
| MAP1A         | -0.273447392 | 1.419222016 | -4.15599524  | 3.81E-05 | 0.789729291 |
| DACT2         | 0.456264495  | 1.184046209 | 4.154493431  | 3.84E-05 | 0.783698984 |
| TMBIM1        | -0.238008655 | 5.539970642 | -4.154050449 | 3.85E-05 | 0.78192064  |
| BRAT1         | 0.214516542  | 3.327414632 | 4.1527998    | 3.87E-05 | 0.776900885 |
| LRRC75A-AS1   | 0.327711148  | 5.931110201 | 4.152665735  | 3.87E-05 | 0.776362868 |
| TBC1D8        | 0.305063468  | 2.736860359 | 4.1522669    | 3.87E-05 | 0.774762399 |
| EMC6          | 0.201802074  | 2.092604238 | 4.151742981  | 3.88E-05 | 0.772660208 |
| CAMK2N1       | -0.465217299 | 3.451548545 | -4.151306156 | 3.89E-05 | 0.770907663 |
| CGREF1        | 0.367470904  | 1.155233581 | 4.150940294  | 3.90E-05 | 0.769439951 |
| SNHG3         | 0.307799281  | 2.932403279 | 4.149201913  | 3.93E-05 | 0.76246783  |
| POLE          | 0.206926336  | 1.803226198 | 4.14901365   | 3.93E-05 | 0.761712929 |
| CALCOCO1      | -0.219901675 | 3.193866847 | -4.147960545 | 3.95E-05 | 0.757490748 |
| MASTL         | 0.211805864  | 2.397635807 | 4.146552916  | 3.97E-05 | 0.751848743 |
| SH3YL1        | 0.212767905  | 2.667982098 | 4.144624345  | 4.00E-05 | 0.744121624 |
| ASNS          | 0.309148035  | 3.135949945 | 4.144269402  | 4.01E-05 | 0.742699853 |
| MT1E          | -0.524386749 | 4.526026552 | -4.143474955 | 4.02E-05 | 0.739518008 |
| HCG4P5        | -0.550461485 | 2.896677718 | -4.142982428 | 4.03E-05 | 0.737545668 |
| URB1          | 0.227198075  | 2.569943204 | 4.141740764  | 4.05E-05 | 0.732574363 |
| UCK2          | 0.341675743  | 2.211330741 | 4.137312933  | 4.13E-05 | 0.714857772 |
| TEAD3         | 0.217031264  | 4.014939974 | 4.137017153  | 4.13E-05 | 0.713674928 |
| LOXL2         | -0.424482654 | 3.048696127 | -4.136791012 | 4.14E-05 | 0.71277063  |
| TSPYL4        | -0.202327465 | 2.647684869 | -4.134632945 | 4.17E-05 | 0.704143223 |
| C11orf88      | -0.272828373 | 0.487149883 | -4.134537757 | 4.18E-05 | 0.703762783 |
| AKAP14        | -0.26513561  | 0.476426909 | -4.132480995 | 4.21E-05 | 0.695544453 |
| PAQR6         | 0.275162139  | 1.117065682 | 4.131182672  | 4.23E-05 | 0.690358629 |
| CDC45         | 0.341323097  | 2.041049103 | 4.129576088  | 4.26E-05 | 0.68394364  |

|             |              |             |              |          |             |
|-------------|--------------|-------------|--------------|----------|-------------|
| GS1-358P8.4 | -0.222353976 | 2.198177221 | -4.124812459 | 4.35E-05 | 0.664936465 |
| FDPS        | 0.209050526  | 4.852573277 | 4.124562936  | 4.35E-05 | 0.663941414 |
| PPP1R3B     | 0.31774203   | 3.582295004 | 4.124439822  | 4.36E-05 | 0.663450482 |
| MROH1       | 0.233533504  | 2.747285082 | 4.124239987  | 4.36E-05 | 0.662653645 |
| RAB30-AS1   | 0.205156371  | 1.850060883 | 4.123989316  | 4.36E-05 | 0.661654147 |
| FANCI       | 0.266626926  | 2.206467915 | 4.122900802  | 4.38E-05 | 0.657314592 |
| CCT6A       | 0.247739903  | 5.780862983 | 4.121884114  | 4.40E-05 | 0.65326235  |
| FZD2        | -0.31333912  | 2.213087835 | -4.120428149 | 4.43E-05 | 0.647460895 |
| ZMAT4       | 0.254145573  | 0.273712971 | 4.118627043  | 4.46E-05 | 0.640286835 |
| EHD3        | -0.211600787 | 2.021272906 | -4.116540093 | 4.50E-05 | 0.631977879 |
| SLC12A4     | -0.203682743 | 2.762313953 | -4.115999376 | 4.51E-05 | 0.629825718 |
| ARNTL2      | -0.405357309 | 2.139395512 | -4.114849862 | 4.54E-05 | 0.625251299 |
| CYS1        | -0.366080785 | 1.306967216 | -4.114646573 | 4.54E-05 | 0.624442448 |
| RASSF3      | -0.224539653 | 3.945013476 | -4.114639756 | 4.54E-05 | 0.624415325 |
| FOXP4       | 0.269601459  | 4.191883836 | 4.111616216  | 4.60E-05 | 0.612389611 |
| PCGF2       | 0.231855908  | 3.807053575 | 4.111379068  | 4.60E-05 | 0.611446736 |
| HCG4        | -0.216824276 | 0.709545184 | -4.110140046 | 4.63E-05 | 0.606521345 |
| ACTL6A      | 0.220192433  | 4.041591117 | 4.108458968  | 4.66E-05 | 0.599840901 |
| AC007318.5  | 0.260360111  | 1.792089176 | 4.108010668  | 4.67E-05 | 0.598059833 |
| CXCL1       | -0.568041251 | 3.581694296 | -4.107304502 | 4.68E-05 | 0.595254644 |
| MAMSTR      | 0.218013888  | 0.91432226  | 4.105732966  | 4.71E-05 | 0.589013458 |
| SPTLC3      | -0.290949634 | 1.388089962 | -4.104875071 | 4.73E-05 | 0.585607359 |
| STEAP1      | -0.500811635 | 3.443155768 | -4.103996411 | 4.75E-05 | 0.582119512 |
| ITGA6       | -0.411097794 | 3.378256821 | -4.103258944 | 4.76E-05 | 0.579192665 |
| NUF2        | 0.356645094  | 2.020752191 | 4.102593677  | 4.77E-05 | 0.576552789 |
| PPFIA3      | 0.224069497  | 1.331397899 | 4.102080695  | 4.78E-05 | 0.574517476 |
| ZBTB7B      | 0.215651022  | 4.333019025 | 4.100930398  | 4.81E-05 | 0.569954404 |
| RAP1GAP     | 0.500741412  | 3.610272552 | 4.099672151  | 4.83E-05 | 0.564964481 |
| EPB41L5     | 0.234931198  | 2.608453918 | 4.099273326  | 4.84E-05 | 0.563383127 |
| SLC6A14     | -0.611243855 | 3.588043989 | -4.097970219 | 4.87E-05 | 0.558217277 |
| MYCN        | 0.43434803   | 0.808896239 | 4.095882376  | 4.91E-05 | 0.54994373  |
| IGHD2-8     | -0.219726652 | 0.322945019 | -4.094809699 | 4.93E-05 | 0.545694541 |
| AURKB       | 0.395098343  | 2.572819587 | 4.094677988  | 4.93E-05 | 0.545172868 |

|                |              |             |              |          |             |
|----------------|--------------|-------------|--------------|----------|-------------|
| ZNF579         | 0.202819551  | 2.100299964 | 4.092624417  | 4.98E-05 | 0.537041212 |
| ALDH1L2        | -0.257317634 | 1.20319915  | -4.092257397 | 4.98E-05 | 0.5355883   |
| ADORA1         | -0.383898786 | 1.381083494 | -4.09074988  | 5.02E-05 | 0.529621815 |
| PPP2R2C        | 0.37493817   | 0.793307741 | 4.09017758   | 5.03E-05 | 0.527357291 |
| RP11-466H18.1  | 0.300048892  | 4.462282292 | 4.090093876  | 5.03E-05 | 0.52702611  |
| KLHDC9         | 0.291007429  | 2.049917627 | 4.090034493  | 5.03E-05 | 0.52679116  |
| RP11-169F17.1  | 0.360102797  | 0.787408923 | 4.089938898  | 5.03E-05 | 0.526412944 |
| ERLIN2         | 0.227346102  | 3.101765128 | 4.086415214  | 5.11E-05 | 0.512477426 |
| PVT1           | 0.261241112  | 1.709058542 | 4.085922785  | 5.12E-05 | 0.510530857 |
| CKS1B          | 0.308929205  | 3.579464238 | 4.083331708  | 5.17E-05 | 0.500291946 |
| DLX4           | 0.209849163  | 0.924997416 | 4.081487226  | 5.21E-05 | 0.493006982 |
| GUCY1B2        | 0.23869351   | 0.849672335 | 4.081471484  | 5.21E-05 | 0.492944824 |
| MIR4635        | -0.355593551 | 1.506828144 | -4.08071466  | 5.23E-05 | 0.489956572 |
| TSNARE1        | 0.255940933  | 2.230692637 | 4.079239497  | 5.26E-05 | 0.484133516 |
| ENKUR          | -0.270407199 | 0.69599778  | -4.078292101 | 5.28E-05 | 0.480394806 |
| SLC25A21-AS1   | 0.209624539  | 1.066669189 | 4.075067877  | 5.35E-05 | 0.467677131 |
| PLAC4          | 0.228970628  | 0.190809615 | 4.074373409  | 5.37E-05 | 0.464939091 |
| CECR2          | 0.265588981  | 0.971987202 | 4.072533856  | 5.41E-05 | 0.457688501 |
| DENND4C        | -0.203386168 | 2.579432767 | -4.072429758 | 5.41E-05 | 0.457278291 |
| FBXL6          | 0.241320007  | 2.984371056 | 4.072390519  | 5.41E-05 | 0.457123669 |
| ECH1           | 0.220055164  | 5.646811297 | 4.071434932  | 5.44E-05 | 0.453358556 |
| SHANK3         | -0.220533143 | 2.007479652 | -4.069793282 | 5.47E-05 | 0.446892219 |
| BCL2L10        | 0.219486978  | 0.5273713   | 4.068240145  | 5.51E-05 | 0.440776776 |
| PRKACB         | -0.276440749 | 2.71160758  | -4.067911665 | 5.52E-05 | 0.439483669 |
| CCL28          | -0.356701144 | 1.701214996 | -4.067520968 | 5.53E-05 | 0.437945768 |
| IFFO2          | -0.26054159  | 2.339192818 | -4.065757167 | 5.57E-05 | 0.431004632 |
| NR2F2          | -0.248408564 | 3.068632747 | -4.063670082 | 5.61E-05 | 0.422794907 |
| C1orf226       | 0.279274323  | 2.491561974 | 4.061690393  | 5.66E-05 | 0.415011277 |
| RP11-307C12.11 | 0.217031851  | 1.409707092 | 4.061044584  | 5.68E-05 | 0.412472888 |
| FMN1           | -0.211346261 | 1.083963262 | -4.059684366 | 5.71E-05 | 0.407127712 |
| RP11-320G10.1  | 0.211429883  | 0.283059578 | 4.05850847   | 5.74E-05 | 0.402508204 |
| PFKM           | 0.20706906   | 2.767597007 | 4.058286778  | 5.74E-05 | 0.401637427 |
| AC098973.2     | 0.336531703  | 0.453591058 | 4.055758504  | 5.80E-05 | 0.391709856 |

|               |              |             |              |          |             |
|---------------|--------------|-------------|--------------|----------|-------------|
| TSTD1         | 0.305736585  | 5.035534042 | 4.055140597  | 5.82E-05 | 0.389284449 |
| ZDHC12        | 0.209095013  | 4.064238966 | 4.055074105  | 5.82E-05 | 0.389023477 |
| RIMKLA        | 0.29276035   | 1.129469778 | 4.054337217  | 5.84E-05 | 0.386131542 |
| KLHL5         | -0.277919146 | 3.206744404 | -4.052189675 | 5.89E-05 | 0.377706269 |
| SMIM10        | -0.243601365 | 1.817317629 | -4.050055611 | 5.94E-05 | 0.369338016 |
| PLK2          | -0.3218143   | 3.299315583 | -4.049964921 | 5.94E-05 | 0.368982487 |
| CTPS1         | 0.234046665  | 2.856061005 | 4.049883555  | 5.94E-05 | 0.368663517 |
| C22orf15      | -0.217590632 | 0.40932145  | -4.049714504 | 5.95E-05 | 0.368000822 |
| KIFC1         | 0.374789748  | 2.858319941 | 4.04868781   | 5.97E-05 | 0.363976656 |
| FAM118B       | -0.206214584 | 2.755544458 | -4.048332732 | 5.98E-05 | 0.36258514  |
| RPL7P1        | 0.287888762  | 1.697927961 | 4.046211686  | 6.03E-05 | 0.354275331 |
| CLEC3B        | -0.423703971 | 2.682223499 | -4.045714209 | 6.05E-05 | 0.352326911 |
| MICA          | -0.230941895 | 3.137364708 | -4.045570065 | 6.05E-05 | 0.351762397 |
| GPR87         | -0.612950464 | 1.881044888 | -4.044744202 | 6.07E-05 | 0.348528422 |
| SORBS2        | 0.323818847  | 1.59275218  | 4.044243476  | 6.08E-05 | 0.346567947 |
| PRSS23        | -0.342371147 | 3.553696316 | -4.042992565 | 6.12E-05 | 0.341671282 |
| WDR38         | -0.419972283 | 0.991801753 | -4.039913539 | 6.19E-05 | 0.329624545 |
| CRABP2        | -0.816225266 | 6.143848942 | -4.039124211 | 6.21E-05 | 0.326537671 |
| CA3           | -0.27545133  | 0.967870851 | -4.038868005 | 6.22E-05 | 0.325535833 |
| NATD1         | -0.219168591 | 2.019179442 | -4.037455642 | 6.26E-05 | 0.320014155 |
| MIR34A        | -0.245031131 | 1.047956635 | -4.036412155 | 6.28E-05 | 0.315935771 |
| RASAL1        | 0.312709069  | 1.487566077 | 4.036336416  | 6.29E-05 | 0.315639788 |
| RP11-284F21.7 | 0.412462421  | 1.44379031  | 4.035105018  | 6.32E-05 | 0.310828325 |
| ITGB6         | -0.454304822 | 4.435498129 | -4.034842083 | 6.32E-05 | 0.309801131 |
| OGDHL         | 0.256779657  | 0.494357144 | 4.033179143  | 6.37E-05 | 0.303306071 |
| RP11-1398P2.1 | -0.236291873 | 1.582486209 | -4.032936637 | 6.37E-05 | 0.302359111 |
| POU6F2-AS2    | 0.288536765  | 0.453512462 | 4.031998664  | 6.40E-05 | 0.298696915 |
| UPP1          | -0.333951326 | 3.754950889 | -4.031922786 | 6.40E-05 | 0.298400695 |
| DYRK2         | -0.209576128 | 2.343161036 | -4.031239706 | 6.42E-05 | 0.295734249 |
| FUT1          | 0.217173183  | 1.581664817 | 4.027594753  | 6.52E-05 | 0.281513087 |
| ACYP1         | 0.201707621  | 1.87154307  | 4.025251263  | 6.58E-05 | 0.272376079 |
| STOML3        | -0.287016143 | 0.542567931 | -4.024928726 | 6.59E-05 | 0.271118934 |
| SPC24         | 0.285384507  | 1.877843639 | 4.022972775  | 6.64E-05 | 0.263497287 |

|            |              |             |              |          |             |
|------------|--------------|-------------|--------------|----------|-------------|
| SFTPD      | -0.848118414 | 5.840230296 | -4.020416839 | 6.71E-05 | 0.253542939 |
| PIGT       | 0.220467787  | 6.242908508 | 4.020164243  | 6.72E-05 | 0.252559502 |
| SDF2L1     | 0.262936439  | 4.868748489 | 4.017826558  | 6.78E-05 | 0.243460881 |
| ATP5I      | 0.218399474  | 5.985097594 | 4.015417492  | 6.85E-05 | 0.234089621 |
| IGHD1-20   | -0.21955851  | 0.267213657 | -4.014181839 | 6.89E-05 | 0.229284979 |
| TRMT2A     | 0.204555968  | 3.265710387 | 4.013577127  | 6.90E-05 | 0.226934157 |
| DLGAP1-AS2 | 0.255351696  | 1.132531434 | 4.012874564  | 6.92E-05 | 0.224203354 |
| GNG11      | -0.379333394 | 3.292640635 | -4.011837319 | 6.95E-05 | 0.220172491 |
| ATRAID     | 0.205699548  | 5.912158425 | 4.010208247  | 7.00E-05 | 0.213843685 |
| AC068580.5 | -0.23507198  | 1.317399426 | -4.008117946 | 7.06E-05 | 0.205726571 |
| KDR        | -0.394461248 | 3.194257873 | -4.008108495 | 7.06E-05 | 0.20568988  |
| SQRDL      | -0.278370429 | 4.328878892 | -4.007148193 | 7.09E-05 | 0.201962148 |
| UST        | -0.273184198 | 1.46644558  | -4.006975401 | 7.09E-05 | 0.201291486 |
| ANKRD1     | -0.350943408 | 0.905943772 | -4.006432159 | 7.11E-05 | 0.199183165 |
| MCM8       | 0.210413346  | 1.647716984 | 4.006390423  | 7.11E-05 | 0.199021202 |
| STRAP      | 0.221811852  | 5.618558518 | 4.006151141  | 7.12E-05 | 0.198092641 |
| SLC7A2     | 0.641784873  | 2.838584006 | 4.006047339  | 7.12E-05 | 0.197689843 |
| PARD6A     | 0.258016165  | 2.157226202 | 4.005924418  | 7.12E-05 | 0.19721287  |
| CHCHD10    | 0.263453805  | 4.246649653 | 4.005690453  | 7.13E-05 | 0.196305044 |
| PAK1IP1    | 0.218166534  | 3.687331624 | 4.004196329  | 7.17E-05 | 0.190508742 |
| KCNK6      | -0.258954387 | 2.38169497  | -4.001752265 | 7.25E-05 | 0.18103162  |
| ARHGAP29   | -0.242503363 | 2.00463702  | -4.000198619 | 7.29E-05 | 0.175010008 |
| HEPACAM2   | 0.380871483  | 0.451507324 | 3.998820348  | 7.33E-05 | 0.169669949 |
| FSTL3      | -0.376659285 | 3.614959172 | -3.995794852 | 7.42E-05 | 0.157953831 |
| MMP13      | -0.664177981 | 2.070357191 | -3.993296712 | 7.50E-05 | 0.148286145 |
| RFC4       | 0.281283766  | 2.733878762 | 3.99033944   | 7.59E-05 | 0.136848967 |
| CDH3       | -0.543124802 | 3.730476272 | -3.987171362 | 7.69E-05 | 0.124605319 |
| ZNF467     | 0.276181919  | 2.314525684 | 3.986929091  | 7.70E-05 | 0.12366939  |
| LRRN2      | -0.206014201 | 0.856436663 | -3.986328304 | 7.72E-05 | 0.121348693 |
| GRB7       | 0.295839646  | 3.706154666 | 3.985869927  | 7.73E-05 | 0.119578312 |
| AC079630.4 | -0.44133209  | 1.417412304 | -3.984858928 | 7.76E-05 | 0.115674229 |
| ERICH3     | -0.251324386 | 0.412996732 | -3.984816086 | 7.77E-05 | 0.115508808 |
| CENPV      | 0.31522968   | 2.289889717 | 3.984441521  | 7.78E-05 | 0.114062637 |

|               |              |             |              |          |             |
|---------------|--------------|-------------|--------------|----------|-------------|
| CDCP1         | -0.365539293 | 3.416973863 | -3.982815506 | 7.83E-05 | 0.107786163 |
| LINC00152     | -0.242201779 | 2.270304497 | -3.982127361 | 7.85E-05 | 0.105130624 |
| PAK4          | 0.201642413  | 3.403161968 | 3.981264281  | 7.88E-05 | 0.101800621 |
| HRCT1         | -0.255077174 | 1.226469692 | -3.981237499 | 7.88E-05 | 0.101697298 |
| IGHV7-81      | -0.336367735 | 1.27679915  | -3.979984176 | 7.92E-05 | 0.096862866 |
| DRAM1         | -0.394894263 | 4.790400876 | -3.979181904 | 7.95E-05 | 0.09376902  |
| BCOR          | 0.204424247  | 2.755006498 | 3.978940092  | 7.95E-05 | 0.092836622 |
| TMEM54        | 0.266685542  | 5.452758917 | 3.97836747   | 7.97E-05 | 0.090628869 |
| IL17RE        | 0.312258565  | 2.43037987  | 3.977733078  | 7.99E-05 | 0.088183311 |
| DNPH1         | 0.242637073  | 4.534630608 | 3.97748871   | 8.00E-05 | 0.087241379 |
| HTATIP2       | 0.240030828  | 4.560845684 | 3.977176574  | 8.01E-05 | 0.086038309 |
| PDZK1IP1      | -0.580911679 | 5.131075674 | -3.976529377 | 8.03E-05 | 0.083544093 |
| RNU7-45P      | -0.27577624  | 1.108567991 | -3.974712908 | 8.09E-05 | 0.076545683 |
| SHANK2        | 0.200781458  | 1.3883826   | 3.974491862  | 8.10E-05 | 0.075694252 |
| GINS1         | 0.309267886  | 2.097967871 | 3.974337312  | 8.10E-05 | 0.075098976 |
| DSCC1         | 0.273315796  | 1.827399672 | 3.973786974  | 8.12E-05 | 0.072979439 |
| CTDSP2        | -0.202221041 | 5.612354041 | -3.972133281 | 8.18E-05 | 0.066612168 |
| RPS24P8       | 0.208784705  | 1.300218759 | 3.971428358  | 8.20E-05 | 0.063898732 |
| IGLV3-6       | -0.21759614  | 0.417861566 | -3.970792422 | 8.22E-05 | 0.061451234 |
| PAIP2B        | 0.226948586  | 1.546298884 | 3.969449384  | 8.27E-05 | 0.056283555 |
| RBP1          | -0.323461299 | 2.010104596 | -3.969170066 | 8.28E-05 | 0.055209015 |
| RP11-553L6.5  | -0.290416536 | 3.243640327 | -3.968886618 | 8.29E-05 | 0.054118659 |
| DDR1          | 0.250237221  | 5.063990991 | 3.968786792  | 8.29E-05 | 0.053734668 |
| PLEKHG2       | 0.325977601  | 2.788607374 | 3.967173366  | 8.34E-05 | 0.047529745 |
| PPIB          | 0.218910264  | 7.14846469  | 3.966062583  | 8.38E-05 | 0.043259265 |
| DLL3          | 0.387462294  | 0.702697165 | 3.965932774  | 8.39E-05 | 0.042760278 |
| PTPN3         | 0.208695072  | 2.337359771 | 3.964054668  | 8.45E-05 | 0.035542546 |
| RP11-776H12.1 | 0.238879213  | 0.419854269 | 3.963999489  | 8.45E-05 | 0.035330537 |
| RP11-452N17.1 | 0.233698127  | 1.074851136 | 3.963968647  | 8.45E-05 | 0.035212037 |
| CH17-360D5.3  | -0.278559296 | 0.591927479 | -3.963595061 | 8.47E-05 | 0.033776725 |
| PRRX2         | -0.42375782  | 1.93850683  | -3.961491196 | 8.54E-05 | 0.025696072 |
| MIR5195       | -0.257331344 | 0.832843946 | -3.961178714 | 8.55E-05 | 0.024496215 |
| HSPA1B        | 0.286034003  | 5.121118735 | 3.956800781  | 8.70E-05 | 0.007695334 |

|               |              |             |              |          |              |
|---------------|--------------|-------------|--------------|----------|--------------|
| CST2          | -0.421359334 | 1.58351153  | -3.956787233 | 8.70E-05 | 0.00764337   |
| CNKS1R1       | 0.228610013  | 3.342211995 | 3.956478078  | 8.71E-05 | 0.006457612  |
| EFCAB1        | -0.271783797 | 0.547456919 | -3.954106332 | 8.80E-05 | -0.002636285 |
| PDIA4         | 0.254332622  | 7.127944506 | 3.954037228  | 8.80E-05 | -0.002901172 |
| IGF2BP1       | 0.340091637  | 0.503708422 | 3.953549379  | 8.82E-05 | -0.004771047 |
| CMBL          | 0.487652119  | 3.637267945 | 3.952487427  | 8.86E-05 | -0.008840655 |
| CCNB1IP1      | 0.221586046  | 3.220786617 | 3.952364926  | 8.86E-05 | -0.009310035 |
| CTD-2021H9.3  | 0.400975985  | 0.780352791 | 3.952094839  | 8.87E-05 | -0.010344867 |
| AARS          | 0.200752951  | 5.245361256 | 3.951944903  | 8.88E-05 | -0.010919317 |
| COX7A2        | 0.23647158   | 5.490982037 | 3.951873819  | 8.88E-05 | -0.011191651 |
| SELE          | -0.20248445  | 0.592899419 | -3.95039656  | 8.93E-05 | -0.016850261 |
| CPSF1         | 0.246302342  | 4.199145542 | 3.949881816  | 8.95E-05 | -0.01882151  |
| FABP6         | -0.428680126 | 1.696308445 | -3.949674191 | 8.96E-05 | -0.019616559 |
| C9orf24       | -0.437558819 | 1.16059326  | -3.949202579 | 8.98E-05 | -0.021422329 |
| CD302         | -0.275712699 | 2.088540383 | -3.948810945 | 8.99E-05 | -0.022921719 |
| LGMN          | -0.236341061 | 5.853577076 | -3.948071344 | 9.02E-05 | -0.025752931 |
| SMKR1         | 0.430961182  | 1.688795797 | 3.947630196  | 9.03E-05 | -0.027441418 |
| COA3          | 0.228975793  | 5.018008326 | 3.947394514  | 9.04E-05 | -0.028343417 |
| ITPR1         | -0.255405672 | 1.980510267 | -3.94327945  | 9.19E-05 | -0.044084364 |
| ARHGEF40      | -0.223083561 | 2.265635729 | -3.941623627 | 9.25E-05 | -0.05041387  |
| TESC          | 0.762336382  | 4.05669803  | 3.940400903  | 9.30E-05 | -0.055086221 |
| HHLA2         | -0.669850715 | 1.55598104  | -3.938921392 | 9.36E-05 | -0.060738    |
| C11orf96      | -0.375635587 | 3.409684824 | -3.93856911  | 9.37E-05 | -0.062083437 |
| RP11-513G11.4 | 0.252874675  | 0.872834797 | 3.937549149  | 9.41E-05 | -0.065978232 |
| FAM102A       | -0.233719307 | 4.025539865 | -3.935719407 | 9.48E-05 | -0.07296286  |
| F11R          | 0.201848552  | 5.454243068 | 3.935211287  | 9.50E-05 | -0.074901953 |
| DECR2         | 0.219229035  | 2.678580398 | 3.934631178  | 9.52E-05 | -0.077115484 |
| DENND2A       | -0.219734031 | 1.350679591 | -3.929101112 | 9.73E-05 | -0.09820125  |
| MAGEA1        | 0.423625143  | 0.457712424 | 3.928931499  | 9.74E-05 | -0.098847534 |
| TBX15         | 0.388933672  | 1.507808496 | 3.92787256   | 9.78E-05 | -0.102881852 |
| WI2-87327B8.2 | -0.22817159  | 0.648496726 | -3.927861233 | 9.78E-05 | -0.102925001 |
| SLC38A8       | 0.217630189  | 0.232573965 | 3.925308984  | 9.88E-05 | -0.11264427  |
| CLIP4         | -0.214771406 | 2.408306927 | -3.924699584 | 9.91E-05 | -0.114964062 |

|               |              |             |              |             |              |
|---------------|--------------|-------------|--------------|-------------|--------------|
| ENC1          | -0.310589648 | 3.969573382 | -3.924558147 | 9.91E-05    | -0.115502416 |
| DCK           | -0.214833964 | 3.323646597 | -3.923080892 | 9.97E-05    | -0.121124257 |
| ZNF512B       | 0.253339739  | 3.191096189 | 3.922897769  | 9.98E-05    | -0.121821013 |
| SHISA3        | -0.662280918 | 1.678490582 | -3.922714925 | 9.99E-05    | -0.122516674 |
| RPP40         | 0.200818607  | 2.018325326 | 3.919822625  | 0.000101051 | -0.133516884 |
| SLC16A7       | -0.257857971 | 1.270293977 | -3.919099454 | 0.000101346 | -0.136266112 |
| TSPAN19       | -0.218784107 | 0.333166403 | -3.918526029 | 0.00010158  | -0.138445719 |
| RPL10AP6      | 0.222746637  | 1.917613209 | 3.917675427  | 0.000101928 | -0.141678335 |
| SLC26A6       | 0.229836     | 2.02154729  | 3.917346713  | 0.000102063 | -0.1429274   |
| LDHD          | 0.354271693  | 2.220348417 | 3.916533201  | 0.000102397 | -0.146018199 |
| C11orf53      | 0.319127347  | 0.438509399 | 3.916393498  | 0.000102455 | -0.146548917 |
| WWC2          | -0.207023822 | 1.98116089  | -3.91608566  | 0.000102582 | -0.147718296 |
| MET           | -0.566338659 | 4.584485207 | -3.915596473 | 0.000102784 | -0.149576387 |
| OAT           | 0.309262447  | 5.168263017 | 3.914716854  | 0.000103148 | -0.152916918 |
| SPAG5         | 0.329673459  | 2.555879381 | 3.913648944  | 0.000103591 | -0.156971575 |
| RSPO4         | -0.248303632 | 0.724875931 | -3.910629756 | 0.000104856 | -0.168429245 |
| ATP2A2        | 0.205503166  | 4.928906905 | 3.908670303  | 0.000105684 | -0.175860826 |
| MAGEH1        | -0.250109751 | 3.789496627 | -3.908664818 | 0.000105686 | -0.175881622 |
| CDC25C        | 0.231151075  | 1.217684213 | 3.90854241   | 0.000105738 | -0.176345759 |
| RP11-295M3.4  | -0.538393729 | 1.845949874 | -3.906623283 | 0.000106556 | -0.183620776 |
| PODXL2        | 0.541898144  | 4.097929858 | 3.906218098  | 0.000106729 | -0.185156321 |
| HIST1H4I      | 0.309723105  | 3.257339834 | 3.904569463  | 0.000107437 | -0.191402668 |
| HOXB4         | -0.254903149 | 1.000630486 | -3.9043119   | 0.000107548 | -0.192378295 |
| EXO1          | 0.286049298  | 1.551799357 | 3.903772832  | 0.000107781 | -0.194420053 |
| NDNF          | -0.538501859 | 3.720088389 | -3.903248163 | 0.000108008 | -0.196407017 |
| RNF19A        | -0.269689263 | 4.040001927 | -3.902806377 | 0.0001082   | -0.198079901 |
| DNAH9         | -0.213281633 | 0.32069169  | -3.902567759 | 0.000108303 | -0.198983388 |
| C6orf132      | 0.226513492  | 2.644760739 | 3.902559139  | 0.000108307 | -0.199016025 |
| BTG2          | -0.393394428 | 5.496078791 | -3.901173354 | 0.00010891  | -0.204262022 |
| SRC           | 0.206331345  | 3.905496952 | 3.898206019  | 0.000110213 | -0.215489215 |
| FOXC1         | -0.329667086 | 1.879278361 | -3.89686696  | 0.000110805 | -0.22055304  |
| ACAT2         | 0.214122298  | 2.681107578 | 3.893717454  | 0.000112211 | -0.232456853 |
| RP11-115H13.1 | 0.211844019  | 0.311514194 | 3.892703006  | 0.000112667 | -0.236289114 |



|               |              |             |              |             |              |
|---------------|--------------|-------------|--------------|-------------|--------------|
| F2            | 0.251512281  | 0.237902641 | 3.892473579  | 0.000112771 | -0.237155688 |
| ORC6          | 0.229981852  | 1.402249048 | 3.891839165  | 0.000113057 | -0.23955169  |
| IFITM2        | -0.291529605 | 6.211081226 | -3.891798454 | 0.000113076 | -0.239705433 |
| EFHC2         | -0.267100229 | 0.966860099 | -3.890194119 | 0.000113804 | -0.245762854 |
| PTPN13        | -0.441994136 | 2.62306609  | -3.889907792 | 0.000113934 | -0.246843684 |
| HMGN4         | -0.210824328 | 5.290518178 | -3.889224602 | 0.000114246 | -0.249422285 |
| H6PD          | -0.224559947 | 3.848451581 | -3.888686626 | 0.000114492 | -0.251452496 |
| FKBP3         | 0.210620525  | 4.489584065 | 3.886802249  | 0.000115357 | -0.25856167  |
| DAW1          | -0.272753193 | 0.741846506 | -3.885897372 | 0.000115775 | -0.261974339 |
| PPP1R13B      | 0.246831393  | 2.755811998 | 3.885719309  | 0.000115857 | -0.262645799 |
| RP11-98D18.3  | 0.229064235  | 1.687952329 | 3.883095351  | 0.000117078 | -0.27253719  |
| FAM222A       | 0.21699834   | 0.91848308  | 3.881626414  | 0.000117766 | -0.278071814 |
| RBPMS2        | 0.304146906  | 1.580388768 | 3.880370218  | 0.000118358 | -0.282803319 |
| AURKAIP1      | 0.211307028  | 5.44056229  | 3.879994644  | 0.000118536 | -0.284217651 |
| SGK2          | 0.246321288  | 0.824764916 | 3.879245805  | 0.00011889  | -0.287037232 |
| BPGM          | -0.225313517 | 3.552008909 | -3.877842502 | 0.000119557 | -0.292319672 |
| CHTF18        | 0.245537562  | 1.918930267 | 3.876110812  | 0.000120386 | -0.298835775 |
| PNKD          | 0.243983375  | 4.711207606 | 3.874172059  | 0.00012132  | -0.306127779 |
| TRPM2-AS      | 0.228099244  | 0.514831047 | 3.873867094  | 0.000121467 | -0.307274497 |
| C11orf84      | 0.218057352  | 3.30890825  | 3.873433018  | 0.000121677 | -0.308906544 |
| PRDX1         | 0.247901236  | 7.779782815 | 3.872409619  | 0.000122174 | -0.312753657 |
| FOXS1         | -0.202219574 | 1.24174023  | -3.871127034 | 0.0001228   | -0.31757374  |
| CDHR4         | -0.311194268 | 0.642367316 | -3.869650119 | 0.000123524 | -0.323122275 |
| CHAC1         | 0.256319545  | 1.724388197 | 3.867899549  | 0.000124388 | -0.329696305 |
| GPER1         | -0.21335804  | 0.882903549 | -3.86268572  | 0.000126994 | -0.349259545 |
| ATP13A4       | -0.487983588 | 2.213079509 | -3.8620046   | 0.000127338 | -0.351813394 |
| ITGB8         | -0.369560986 | 1.466696563 | -3.861821453 | 0.000127431 | -0.35250003  |
| FSTL4         | 0.435338321  | 1.303222941 | 3.861704098  | 0.00012749  | -0.352939988 |
| MIR23A        | -0.275153637 | 0.839153456 | -3.861576231 | 0.000127555 | -0.353419344 |
| RP11-187E13.1 | 0.224869291  | 0.39768752  | 3.861138343  | 0.000127777 | -0.355060804 |
| ELANE         | -0.222437063 | 0.382274722 | -3.860654955 | 0.000128023 | -0.35687262  |
| RP11-379K22.3 | 0.263135927  | 0.414030338 | 3.859455663  | 0.000128634 | -0.361366844 |
| RP11-56A10.1  | -0.270096022 | 0.675132605 | -3.85864723  | 0.000129048 | -0.364395621 |

|               |              |             |              |             |              |
|---------------|--------------|-------------|--------------|-------------|--------------|
| LRRN4         | -0.542798681 | 2.268476677 | -3.857803671 | 0.000129481 | -0.367555357 |
| HMGCS2        | 0.387677745  | 0.59327386  | 3.857577223  | 0.000129598 | -0.368403458 |
| IGHD1-26      | -0.268010964 | 0.422372238 | -3.855433887 | 0.000130705 | -0.376428431 |
| RASD1         | 0.639821974  | 4.764572939 | 3.855318469  | 0.000130765 | -0.376860455 |
| KIAA0319      | 0.299866184  | 0.752007557 | 3.855244727  | 0.000130803 | -0.377136475 |
| MYH9          | -0.256062873 | 7.140234295 | -3.853237577 | 0.000131849 | -0.384647389 |
| MRPL55        | 0.207343274  | 4.251094289 | 3.853057124  | 0.000131943 | -0.385322481 |
| MAFG          | 0.207745457  | 3.131228582 | 3.852304465  | 0.000132338 | -0.388137916 |
| ADI1          | 0.209470589  | 4.367619612 | 3.851498959  | 0.000132761 | -0.391150459 |
| GARS          | 0.20254845   | 5.01439159  | 3.850949642  | 0.000133051 | -0.393204533 |
| RNU6-850P     | 0.291604374  | 1.418384745 | 3.85082846   | 0.000133114 | -0.393657633 |
| CTD-2006H14.2 | 0.218622126  | 1.918869675 | 3.850768208  | 0.000133146 | -0.393882912 |
| PDE4D         | 0.336550381  | 1.957818488 | 3.848764407  | 0.000134208 | -0.401373096 |
| FOXI3         | 0.337165597  | 0.607294941 | 3.848484007  | 0.000134357 | -0.402420934 |
| PGAP3         | 0.250987295  | 4.029255745 | 3.846070124  | 0.000135648 | -0.411438504 |
| TRIL          | -0.301058606 | 1.427664652 | -3.843640152 | 0.000136959 | -0.420510795 |
| INTS1         | 0.24759615   | 4.178685151 | 3.841988334  | 0.000137858 | -0.426674766 |
| TTC39C        | 0.263918486  | 2.281302028 | 3.838837985  | 0.000139586 | -0.438423779 |
| PVRL3         | -0.301088955 | 1.522452627 | -3.838027438 | 0.000140034 | -0.44144519  |
| SEMA3G        | -0.203224957 | 1.341478917 | -3.838027398 | 0.000140034 | -0.441445338 |
| ZMIZ1         | -0.205501602 | 3.279633452 | -3.836900575 | 0.00014066  | -0.445644709 |
| POLE2         | 0.231725492  | 1.554014652 | 3.836445929  | 0.000140913 | -0.447338724 |
| TMEM190       | -0.449652131 | 1.135204221 | -3.835630217 | 0.000141368 | -0.450377601 |
| ALDH6A1       | 0.235239786  | 2.739763522 | 3.835550987  | 0.000141412 | -0.450672733 |
| HDHD3         | 0.220021999  | 3.891371901 | 3.835072032  | 0.00014168  | -0.452456728 |
| VWA3A         | -0.248587058 | 0.46431153  | -3.834832255 | 0.000141814 | -0.453349762 |
| SPRR1B        | -0.692884937 | 1.509974119 | -3.834726101 | 0.000141873 | -0.453745106 |
| ORC1          | 0.264282484  | 1.592961157 | 3.833942152  | 0.000142313 | -0.456664431 |
| MIR4645       | -0.284701461 | 1.070911224 | -3.833695748 | 0.000142452 | -0.457581891 |
| OSMR          | -0.326989505 | 4.761046156 | -3.832465345 | 0.000143146 | -0.462162338 |
| PDGFB         | -0.255698235 | 2.698525741 | -3.832085881 | 0.000143361 | -0.463574697 |
| CLDN1         | -0.483675404 | 4.056611049 | -3.827898999 | 0.000145749 | -0.479149457 |
| KLHL35        | 0.237087109  | 0.981161401 | 3.827024948  | 0.000146252 | -0.48239881  |

|               |              |             |              |             |              |
|---------------|--------------|-------------|--------------|-------------|--------------|
| RPL37         | 0.225708304  | 6.402804659 | 3.824423069  | 0.00014776  | -0.49206736  |
| DPM3          | 0.316377098  | 5.177060835 | 3.824374793  | 0.000147789 | -0.492246696 |
| MANSC1        | 0.269826731  | 2.702016373 | 3.823880915  | 0.000148077 | -0.494081217 |
| CXADR         | 0.258190424  | 3.199507364 | 3.823214769  | 0.000148466 | -0.496555278 |
| KCNH2         | 0.3492733    | 1.123118722 | 3.821277744  | 0.000149603 | -0.503747071 |
| S1PR3         | -0.205532535 | 1.586034941 | -3.819350409 | 0.000150743 | -0.510899476 |
| IFT57         | -0.356739482 | 4.320776205 | -3.815207641 | 0.000153221 | -0.526261909 |
| MRPS35        | 0.220571189  | 5.114097396 | 3.814976772  | 0.00015336  | -0.527117566 |
| PAM           | -0.266000003 | 4.712265917 | -3.814852841 | 0.000153435 | -0.527576868 |
| CCNO          | 0.383422394  | 2.323506573 | 3.814295275  | 0.000153772 | -0.529643082 |
| XRCC2         | 0.21657122   | 1.186008073 | 3.814149187  | 0.00015386  | -0.530184402 |
| RNU6-140P     | 0.413848403  | 0.676451363 | 3.813717355  | 0.000154122 | -0.531784424 |
| CAD           | 0.225657078  | 3.165492159 | 3.812393941  | 0.000154926 | -0.536686857 |
| IGHD1-1       | -0.307401439 | 0.587604358 | -3.80911291  | 0.000156936 | -0.548834137 |
| TGFB2-AS1     | -0.243722216 | 0.82617623  | -3.808387113 | 0.000157384 | -0.551519903 |
| TEF           | -0.26046888  | 2.694976222 | -3.80611331  | 0.000158796 | -0.55993085  |
| ESR1          | -0.238265941 | 0.79107667  | -3.802208928 | 0.000161248 | -0.574362361 |
| ABCC9         | -0.207634791 | 1.092255843 | -3.801978199 | 0.000161394 | -0.575214751 |
| ZNF608        | -0.232472523 | 1.872458203 | -3.799740015 | 0.000162816 | -0.583480832 |
| PCSK2         | 0.593451458  | 0.814998817 | 3.799353456  | 0.000163063 | -0.584908009 |
| RP5-1057J7.7  | 0.215004084  | 0.943026996 | 3.799298326  | 0.000163098 | -0.585111154 |
| DEGS2         | 0.36202902   | 1.481299407 | 3.798142427  | 0.000163839 | -0.589378247 |
| CYP2J2        | 0.234566072  | 1.805450067 | 3.798098248  | 0.000163867 | -0.589541299 |
| GGT7          | 0.261735622  | 3.356462955 | 3.793882881  | 0.000166596 | -0.605090711 |
| NWD1          | -0.242841611 | 0.538633075 | -3.79337399  | 0.000166928 | -0.60696678  |
| PDE4A         | -0.203700914 | 2.7309716   | -3.791751656 | 0.000167991 | -0.612946055 |
| PRKCA         | -0.282551598 | 1.987871079 | -3.791463595 | 0.000168181 | -0.614007481 |
| SMIM22        | 0.399415956  | 4.421409732 | 3.789922006  | 0.000169198 | -0.61968652  |
| SEL1L3        | -0.231401769 | 4.798265241 | -3.789915417 | 0.000169203 | -0.619710791 |
| KCNJ15        | -0.444551494 | 2.111242293 | -3.786011034 | 0.000171806 | -0.634084323 |
| RP11-291L22.7 | 0.239086471  | 1.766689438 | 3.785621072  | 0.000172068 | -0.635519152 |
| SPAG6         | -0.367278889 | 0.991621997 | -3.78538572  | 0.000172226 | -0.636385044 |
| VAMP5         | -0.386375679 | 5.673177075 | -3.783970581 | 0.000173181 | -0.641590446 |

|               |              |             |              |             |              |
|---------------|--------------|-------------|--------------|-------------|--------------|
| ARID3A        | 0.231277891  | 1.795515763 | 3.782561057  | 0.000174137 | -0.646773374 |
| IGLV2-33      | -0.248239791 | 0.696449141 | -3.78182139  | 0.000174641 | -0.649492455 |
| ZC3HAV1L      | 0.203579321  | 1.943750169 | 3.779521313  | 0.000176216 | -0.657944537 |
| AC093838.4    | 0.239739684  | 2.487788098 | 3.778839609  | 0.000176685 | -0.660448657 |
| VWA5A         | -0.27128548  | 2.886354108 | -3.778210932 | 0.000177119 | -0.662757616 |
| SLC38A3       | 0.215307142  | 0.326838061 | 3.777541555  | 0.000177583 | -0.665215655 |
| KCTD1         | 0.206817939  | 1.408342822 | 3.776660625  | 0.000178194 | -0.668449916 |
| IGKV6D-41     | -0.202816394 | 0.297081845 | -3.776034404 | 0.00017863  | -0.670748603 |
| C16orf13      | 0.219473014  | 4.793615989 | 3.775573755  | 0.000178951 | -0.67243929  |
| PTPRB         | -0.238546585 | 1.724135546 | -3.774461598 | 0.000179728 | -0.676520357 |
| LIMA1         | -0.215428062 | 3.92402994  | -3.774033062 | 0.000180029 | -0.678092572 |
| WLS           | -0.374724183 | 3.991171829 | -3.772801691 | 0.000180895 | -0.682609287 |
| GPR98         | 0.235786571  | 0.795685825 | 3.771758127  | 0.000181632 | -0.686436028 |
| AC007879.7    | -0.298843221 | 0.889981394 | -3.771720445 | 0.000181659 | -0.68657419  |
| RP11-713M15.2 | 0.368713444  | 1.879717431 | 3.770248871  | 0.000182703 | -0.691968695 |
| GOLM1         | 0.305971855  | 5.981951712 | 3.770196692  | 0.00018274  | -0.692159935 |
| RPLP0         | 0.215056106  | 8.289632858 | 3.76951682   | 0.000183225 | -0.69465151  |
| COL21A1       | -0.288463725 | 1.187440643 | -3.769038659 | 0.000183566 | -0.696403606 |
| COLEC11       | 0.231165523  | 0.706464062 | 3.768389997  | 0.00018403  | -0.698780123 |
| NEK2          | 0.343498625  | 2.328624606 | 3.767289464  | 0.000184821 | -0.702811287 |
| PRSS16        | 0.206090894  | 2.406887418 | 3.765805027  | 0.000185891 | -0.708246896 |
| MSLNL         | 0.35061992   | 0.769994218 | 3.763654649  | 0.000187453 | -0.716117413 |
| GINS4         | 0.214824326  | 1.120485551 | 3.76113933   | 0.000189295 | -0.725318252 |
| CATSPERB      | 0.221139527  | 0.700956547 | 3.761069154  | 0.000189347 | -0.725574868 |
| SFTPA1        | -1.091489257 | 7.880445059 | -3.760664523 | 0.000189645 | -0.727054409 |
| UGCG          | -0.204082366 | 4.235753019 | -3.759759855 | 0.000190313 | -0.730361796 |
| CTD-2591A6.2  | 0.219061729  | 0.341893654 | 3.759183325  | 0.000190739 | -0.732469149 |
| VGFB          | 0.339682234  | 0.548070886 | 3.757468795  | 0.000192014 | -0.738734355 |
| RPL37P2       | 0.236265115  | 1.295899745 | 3.757179798  | 0.00019223  | -0.739790139 |
| FAM69B        | 0.352644547  | 2.544414442 | 3.756674719  | 0.000192607 | -0.741635141 |
| NUP155        | 0.221182147  | 2.727984211 | 3.755874581  | 0.000193206 | -0.744557484 |
| NR4A3         | -0.314589785 | 1.281771385 | -3.753390911 | 0.000195078 | -0.753624841 |
| RPS24         | 0.216318257  | 7.371429448 | 3.751244745  | 0.000196709 | -0.76145548  |

|              |              |             |              |             |              |
|--------------|--------------|-------------|--------------|-------------|--------------|
| RP11-675F6.3 | 0.205144175  | 0.302770799 | 3.750226477  | 0.000197487 | -0.76516932  |
| FNDC3B       | -0.20112443  | 3.447255277 | -3.74976278  | 0.000197843 | -0.766860201 |
| HJURP        | 0.337953104  | 2.111428066 | 3.749759673  | 0.000197845 | -0.766871533 |
| DNAJB4       | -0.24439542  | 2.370599464 | -3.745527632 | 0.000201116 | -0.782294654 |
| OXLD1        | 0.208925116  | 3.817022052 | 3.742235183  | 0.000203697 | -0.79428217  |
| SYCE3        | 0.242807377  | 1.044311512 | 3.74223302   | 0.000203698 | -0.794290043 |
| LINC00973    | -0.386836979 | 0.59639467  | -3.741708923 | 0.000204112 | -0.796197315 |
| GOLIM4       | -0.212613349 | 3.807147228 | -3.741689932 | 0.000204127 | -0.796266421 |
| SLC43A3      | -0.31669943  | 3.908144793 | -3.741381682 | 0.000204371 | -0.797388067 |
| IGHD6-13     | -0.277200059 | 0.44912368  | -3.740953095 | 0.00020471  | -0.798947445 |
| PEX6         | 0.25731758   | 3.548829046 | 3.740163024  | 0.000205337 | -0.801821612 |
| FAAH         | 0.260952236  | 3.168108862 | 3.738398027  | 0.000206743 | -0.808240349 |
| PKIB         | -0.375668136 | 1.95740244  | -3.736964386 | 0.000207893 | -0.813451938 |
| NXPH4        | 0.410911137  | 1.14011031  | 3.733767402  | 0.000210477 | -0.825066854 |
| CREG1        | -0.210518416 | 5.689121435 | -3.733301702 | 0.000210856 | -0.826757998 |
| CELSR3       | 0.238895781  | 1.077971267 | 3.732511811  | 0.0002115   | -0.829625954 |
| CHST10       | 0.228906908  | 1.897675347 | 3.732398967  | 0.000211593 | -0.830035624 |
| CLPSL2       | 0.266155899  | 0.66602971  | 3.730959118  | 0.000212772 | -0.835261835 |
| LRRC36       | -0.253982748 | 0.695483403 | -3.727650957 | 0.000215506 | -0.847262231 |
| BPIFB2       | 0.638359173  | 1.271272321 | 3.726138528  | 0.000216767 | -0.852745234 |
| AKAP13       | -0.235457698 | 3.265592174 | -3.725555892 | 0.000217255 | -0.854856901 |
| SOCS2        | -0.29999736  | 1.815581807 | -3.725431606 | 0.000217359 | -0.855307311 |
| SLC45A3      | -0.249965347 | 2.149815419 | -3.724459139 | 0.000218176 | -0.858831048 |
| GINS2        | 0.287822082  | 2.044176701 | 3.724414213  | 0.000218213 | -0.858993817 |
| THBS4        | -0.425381346 | 1.214884771 | -3.723872576 | 0.000218669 | -0.860956041 |
| TARBP1       | 0.219569514  | 2.799914804 | 3.721810747  | 0.000220414 | -0.868423093 |
| IVL          | -0.528284189 | 1.246034201 | -3.720328382 | 0.000221676 | -0.873789162 |
| GADD45G      | 0.386034726  | 3.575551077 | 3.718677755  | 0.00022309  | -0.879761951 |
| GLDC         | 0.311944467  | 0.790089267 | 3.717916411  | 0.000223745 | -0.882516025 |
| RNU1-106P    | 0.24728658   | 1.219878297 | 3.717745365  | 0.000223892 | -0.883134691 |
| ZYG11A       | 0.203893371  | 0.695448895 | 3.716289344  | 0.00022515  | -0.88839997  |
| SLC25A25-AS1 | 0.216128727  | 1.220759336 | 3.715490351  | 0.000225843 | -0.891288468 |
| RALGPS2      | -0.202780558 | 2.180677528 | -3.715095983 | 0.000226186 | -0.892713959 |

|               |              |             |              |             |              |
|---------------|--------------|-------------|--------------|-------------|--------------|
| RP11-455F5.3  | 0.275633209  | 0.987391445 | 3.714925218  | 0.000226335 | -0.893331163 |
| NID1          | -0.308300516 | 3.752846126 | -3.713829782 | 0.000227291 | -0.897289828 |
| RP11-408B11.2 | 0.219980792  | 0.302986816 | 3.71345094   | 0.000227622 | -0.898658624 |
| GPR56         | 0.313116934  | 4.343790204 | 3.713017641  | 0.000228002 | -0.900224015 |
| DNAI2         | -0.262526723 | 0.516533726 | -3.712846562 | 0.000228152 | -0.900842031 |
| TNFRSF18      | -0.376527931 | 2.465033384 | -3.711702099 | 0.000229158 | -0.904975651 |
| SLC6A20       | -0.316658532 | 0.83739789  | -3.710714795 | 0.000230029 | -0.908540673 |
| PODXL         | -0.232054123 | 3.535115199 | -3.709280548 | 0.0002313   | -0.913717946 |
| EFCC1         | -0.205880728 | 1.182510009 | -3.708800663 | 0.000231727 | -0.915449787 |
| CERCAM        | -0.288624154 | 3.271698981 | -3.708485373 | 0.000232008 | -0.91658751  |
| IPCEF1        | -0.255995502 | 1.035385897 | -3.707651855 | 0.000232752 | -0.919594821 |
| F12           | 0.255008656  | 1.385993365 | 3.703723733  | 0.000236288 | -0.933758773 |
| SPSB1         | -0.22930745  | 4.182609582 | -3.702655768 | 0.000237259 | -0.937607169 |
| PLEKHH2       | -0.239850504 | 1.479677517 | -3.701896437 | 0.000237951 | -0.940342766 |
| HBA2          | -0.482040693 | 2.473923862 | -3.700908492 | 0.000238854 | -0.943901182 |
| FCHO2         | -0.218323603 | 3.373923542 | -3.697169465 | 0.000242302 | -0.957360408 |
| ATP5J2        | 0.22285119   | 5.354381744 | 3.696928979  | 0.000242525 | -0.958225635 |
| CCNA1         | -0.206148672 | 0.483373054 | -3.696741577 | 0.0002427   | -0.958899841 |
| MGST1         | 0.328270829  | 5.116091971 | 3.696533761  | 0.000242893 | -0.959647448 |
| MYBPH         | -0.372936138 | 0.883866212 | -3.696386827 | 0.00024303  | -0.960176012 |
| ID3           | -0.288774244 | 4.464717538 | -3.695632081 | 0.000243733 | -0.962890736 |
| VEPH1         | -0.314352738 | 1.362116729 | -3.694157125 | 0.000245114 | -0.968194448 |
| SOX2          | 0.563672737  | 2.349699722 | 3.693981841  | 0.000245279 | -0.968824608 |
| IDH1          | 0.24669565   | 5.162971152 | 3.693178126  | 0.000246034 | -0.971713668 |
| SLC4A3        | 0.2534186    | 1.237772884 | 3.693158335  | 0.000246053 | -0.971784801 |
| Six3os1_1     | 0.234403104  | 0.451823384 | 3.690382001  | 0.000248681 | -0.981760073 |
| TTY15         | 0.235469554  | 0.538211143 | 3.688287112  | 0.000250682 | -0.989282238 |
| SERF2         | 0.200740278  | 5.838731294 | 3.687140545  | 0.000251783 | -0.99339753  |
| RP1-86C11.7   | 0.229423074  | 0.779818329 | 3.684066104  | 0.000254759 | -1.004426425 |
| ZFP57         | -0.219199121 | 0.522054526 | -3.683970273 | 0.000254852 | -1.004770057 |
| MORN5         | -0.339526925 | 0.818308934 | -3.682021582 | 0.000256756 | -1.011755885 |
| HSD11B2       | 0.30255541   | 1.857403403 | 3.681574797  | 0.000257194 | -1.013357065 |
| HNF1A         | 0.203956908  | 0.437551781 | 3.679578764  | 0.000259161 | -1.020508159 |

|               |              |             |              |             |              |
|---------------|--------------|-------------|--------------|-------------|--------------|
| PLAC8         | -0.399546869 | 2.010192445 | -3.678818312 | 0.000259915 | -1.023231627 |
| RP11-138J23.1 | 0.211111233  | 0.41242155  | 3.677709616  | 0.000261016 | -1.027201335 |
| HOXD13        | 0.2193735    | 0.210309673 | 3.677568688  | 0.000261157 | -1.02770585  |
| SYT12         | -0.410539738 | 1.335999681 | -3.676044249 | 0.000262679 | -1.033162089 |
| PALM          | -0.252496646 | 2.082831731 | -3.674533741 | 0.000264197 | -1.038566354 |
| UNC13B        | 0.319931897  | 4.073594514 | 3.674416273  | 0.000264315 | -1.038986537 |
| S100A10       | -0.33158171  | 8.007779763 | -3.673465641 | 0.000265274 | -1.042386507 |
| E2F8          | 0.227598792  | 1.447672277 | 3.673266971  | 0.000265475 | -1.043096954 |
| TRIM16        | 0.266979663  | 2.060210868 | 3.671422906  | 0.000267347 | -1.049689607 |
| IFITM1        | -0.398738665 | 6.592403814 | -3.670533522 | 0.000268254 | -1.05286809  |
| PABPC1L       | 0.356012137  | 2.76398881  | 3.667092408  | 0.000271792 | -1.06515909  |
| SLC24A3       | -0.291261094 | 1.750641901 | -3.666266192 | 0.000272647 | -1.06810855  |
| ZNF281        | 0.203342532  | 3.473285817 | 3.662726303  | 0.000276343 | -1.080738262 |
| CRYAB         | -0.274156477 | 1.926830242 | -3.662271507 | 0.000276821 | -1.082360059 |
| GNG4          | 0.39253712   | 0.925928167 | 3.661720627  | 0.000277401 | -1.084324234 |
| ME1           | 0.340971644  | 3.275074238 | 3.660553121  | 0.000278635 | -1.088486075 |
| GPI           | 0.20417764   | 5.328738212 | 3.658015568  | 0.000281334 | -1.097527428 |
| RPS20         | 0.204693437  | 8.021172444 | 3.655757901  | 0.000283756 | -1.105566549 |
| DSCR8         | 0.232968545  | 0.229722142 | 3.655680041  | 0.00028384  | -1.105843709 |
| SLC15A2       | -0.322175359 | 2.092513944 | -3.655220225 | 0.000284335 | -1.107480417 |
| NCAPG2        | 0.247216611  | 2.319099389 | 3.654325507  | 0.000285302 | -1.11066459  |
| SIX2          | 0.416454556  | 1.367915418 | 3.652504559  | 0.00028728  | -1.117142807 |
| FBXL19        | 0.203419579  | 2.802579069 | 3.652427206  | 0.000287364 | -1.117417931 |
| CAMP          | -0.210710265 | 0.582574483 | -3.649983054 | 0.00029004  | -1.126108273 |
| SNORD104      | 0.374956091  | 3.703511505 | 3.649022575  | 0.000291098 | -1.129521812 |
| C9orf171      | -0.241482253 | 0.513304574 | -3.648895361 | 0.000291238 | -1.129973864 |
| SIVA1         | 0.200382992  | 3.625592411 | 3.648725629  | 0.000291425 | -1.130576983 |
| CCDC42B       | -0.301729401 | 0.852770714 | -3.64798938  | 0.00029224  | -1.133192832 |
| ST6GAL1       | -0.281665452 | 3.840013339 | -3.647180339 | 0.000293137 | -1.136066726 |
| ARFGAP1       | 0.202717525  | 4.017688235 | 3.646299409  | 0.000294117 | -1.1391953   |
| MYCL          | 0.293610641  | 1.757663242 | 3.646092087  | 0.000294348 | -1.139931489 |
| KIAA1244      | 0.270837152  | 2.333078684 | 3.645590806  | 0.000294907 | -1.141711345 |
| OVGP1         | 0.23572463   | 1.359442209 | 3.643493559  | 0.000297258 | -1.149155349 |

|               |              |             |              |             |              |
|---------------|--------------|-------------|--------------|-------------|--------------|
| CHRD          | 0.29579874   | 1.348537977 | 3.643138987  | 0.000297657 | -1.150413473 |
| SPC25         | 0.253787786  | 1.726870796 | 3.64308908   | 0.000297713 | -1.150590547 |
| BEX1          | 0.391089294  | 0.636546672 | 3.642225114  | 0.000298688 | -1.153655619 |
| HIGD1B        | -0.266252466 | 1.816748092 | -3.640941729 | 0.000300142 | -1.158207383 |
| RP11-806H10.4 | 0.203838459  | 1.059766421 | 3.640191291  | 0.000300995 | -1.160868246 |
| RP3-395M20.8  | -0.204234045 | 0.933542231 | -3.640040352 | 0.000301167 | -1.161403373 |
| SCTR          | -0.491789931 | 2.086795821 | -3.637357473 | 0.000304237 | -1.170911556 |
| GLI4          | 0.221515624  | 2.290298741 | 3.635973615  | 0.000305833 | -1.175813382 |
| APCDD1L       | -0.201733099 | 0.502401708 | -3.635179679 | 0.000306752 | -1.178624822 |
| CLGN          | 0.342982373  | 1.118201554 | 3.63348116   | 0.000308726 | -1.184637559 |
| JAG1          | -0.282757624 | 2.642175717 | -3.633440412 | 0.000308773 | -1.184781773 |
| MYH14         | 0.3135215    | 4.344312304 | 3.6325394    | 0.000309826 | -1.187970229 |
| LYPLA1        | 0.252021538  | 4.411959315 | 3.630270649  | 0.00031249  | -1.195995452 |
| RP11-403P17.6 | -0.241544291 | 1.80694505  | -3.629644941 | 0.000313229 | -1.198207926 |
| RCC1          | 0.202756088  | 4.118216212 | 3.629439813  | 0.000313471 | -1.198933169 |
| SPRY1         | -0.236932911 | 3.580292446 | -3.627863341 | 0.000315341 | -1.204505593 |
| NASP          | 0.203430976  | 3.714197848 | 3.627325852  | 0.000315981 | -1.206404953 |
| B4GALT4       | 0.20365085   | 2.438530086 | 3.625385672  | 0.000318301 | -1.213258879 |
| RAD54L        | 0.246687581  | 1.445930626 | 3.624198925  | 0.000319727 | -1.217449493 |
| SGPP2         | -0.386597351 | 4.355849054 | -3.623348299 | 0.000320754 | -1.220452404 |
| PROSER2       | 0.21586566   | 2.479517142 | 3.622731157  | 0.0003215   | -1.222630646 |
| SLC15A1       | 0.277622762  | 0.654505004 | 3.621412344  | 0.000323101 | -1.227284294 |
| FGB           | 0.975671726  | 2.207247513 | 3.619022667  | 0.000326021 | -1.23571257  |
| FOXO6         | 0.291427792  | 1.392258667 | 3.618953756  | 0.000326106 | -1.235955535 |
| CCDC64B       | 0.294067575  | 2.691831282 | 3.618792336  | 0.000326304 | -1.236524656 |
| KIF1A         | 0.477865509  | 0.891196767 | 3.618718941  | 0.000326394 | -1.236783417 |
| CENPF         | 0.318930404  | 2.222772488 | 3.617125193  | 0.000328358 | -1.242401108 |
| SMAD9         | 0.229054287  | 1.1387666   | 3.616875675  | 0.000328666 | -1.243280407 |
| RP11-157P1.4  | 0.299258522  | 2.037722932 | 3.616333102  | 0.000329337 | -1.245192223 |
| MIR635        | -0.213573854 | 2.59826035  | -3.612945015 | 0.000333356 | -1.257124376 |
| PABPC1        | 0.220640194  | 8.261754908 | 3.612013891  | 0.000334729 | -1.260401746 |
| ZBBX          | -0.208898431 | 0.436094661 | -3.608927867 | 0.000338632 | -1.271258204 |
| EDN1          | -0.381220788 | 3.322266226 | -3.608544639 | 0.000339119 | -1.272605763 |



|              |              |             |              |             |              |
|--------------|--------------|-------------|--------------|-------------|--------------|
| MAFK         | 0.325305008  | 3.578154557 | 3.606711666  | 0.000341461 | -1.279049242 |
| RP3-438O4.4  | 0.212105117  | 0.295045941 | 3.603808061  | 0.000345201 | -1.28924997  |
| CCT2         | 0.241546334  | 5.067097686 | 3.602481429  | 0.000346923 | -1.293907999 |
| GCLC         | 0.468207388  | 3.049656456 | 3.60060398   | 0.000349373 | -1.300497261 |
| ST8SIA6-AS1  | 0.278761895  | 0.367814491 | 3.600061658  | 0.000350084 | -1.302400035 |
| CLASRP       | 0.200075773  | 2.932249543 | 3.599233085  | 0.000351172 | -1.305306616 |
| WNT5A        | -0.279764767 | 2.109035489 | -3.597575509 | 0.00035336  | -1.311119378 |
| RHOC         | -0.218627628 | 5.426394492 | -3.597193459 | 0.000353865 | -1.312458786 |
| MCM10        | 0.246371049  | 1.294007825 | 3.595137962  | 0.000356599 | -1.319662717 |
| PAX9         | 0.33558274   | 1.314278407 | 3.594172008  | 0.000357891 | -1.323046762 |
| SPTSSA       | 0.298410581  | 5.578572238 | 3.593050611  | 0.000359396 | -1.326974288 |
| CFB          | -0.355308915 | 2.632629025 | -3.592497422 | 0.00036014  | -1.328911324 |
| MIR34C       | -0.270696958 | 0.484364332 | -3.592284071 | 0.000360428 | -1.329658311 |
| NFKBIZ       | -0.307088042 | 3.101206444 | -3.591878049 | 0.000360975 | -1.33107977  |
| SMPDL3B      | 0.347966361  | 4.398402206 | 3.589810397  | 0.000363777 | -1.338316121 |
| PRTFDC1      | 0.257096464  | 2.291273344 | 3.589446227  | 0.000364273 | -1.339590233 |
| KIF2C        | 0.344750702  | 2.606363611 | 3.588764642  | 0.000365202 | -1.341974543 |
| GCLM         | 0.309973736  | 3.146749991 | 3.588290491  | 0.00036585  | -1.343632955 |
| EEF1A1       | -0.200626275 | 9.385798518 | -3.587461336 | 0.000366985 | -1.346532548 |
| RP3-340N1.2  | -0.436729831 | 1.717548118 | -3.586685239 | 0.000368051 | -1.349246017 |
| VPS9D1-AS1   | 0.281279514  | 1.770457761 | 3.585082688  | 0.00037026  | -1.354847256 |
| POLB         | 0.214500966  | 2.911522162 | 3.58465203   | 0.000370856 | -1.356352088 |
| KIF18B       | 0.296349289  | 1.735748798 | 3.584055567  | 0.000371683 | -1.358436002 |
| AREG         | -0.621114776 | 3.8685346   | -3.583907195 | 0.000371889 | -1.358954332 |
| PXDN         | -0.356875806 | 3.384591244 | -3.578914107 | 0.000378882 | -1.376385513 |
| C11orf97     | -0.250206466 | 0.495614311 | -3.577902068 | 0.000380314 | -1.379915792 |
| TRAF5        | -0.209745567 | 1.935886576 | -3.577453098 | 0.000380952 | -1.381481624 |
| CD99         | -0.219408538 | 5.667003987 | -3.577017494 | 0.000381571 | -1.38300066  |
| TXNRD1       | 0.46442099   | 5.17312013  | 3.576169179  | 0.000382779 | -1.385958395 |
| GPRC5C       | 0.360336464  | 3.416471767 | 3.574655009  | 0.000384944 | -1.39123605  |
| ZNF316       | 0.20904058   | 2.97089248  | 3.572689557  | 0.000387773 | -1.398083487 |
| TPBG         | -0.248018218 | 2.721953292 | -3.570175835 | 0.000391418 | -1.406835826 |
| RP11-279F6.2 | 0.281605932  | 0.38535628  | 3.569760659  | 0.000392023 | -1.40828083  |

|                |              |             |              |             |              |
|----------------|--------------|-------------|--------------|-------------|--------------|
| EBP            | 0.212890222  | 4.36996519  | 3.567404328  | 0.000395475 | -1.416478945 |
| CGNL1          | -0.262482236 | 2.237883573 | -3.566542458 | 0.000396744 | -1.419476266 |
| RP11-543P15.1  | 0.312092112  | 4.614166729 | 3.56628927   | 0.000397118 | -1.420356646 |
| RP13-401N8.1   | 0.283702124  | 1.352584378 | 3.564453671  | 0.000399837 | -1.426737576 |
| RP11-505K9.1   | 0.220261604  | 1.228029503 | 3.563329726  | 0.00040151  | -1.430643106 |
| HSD3B7         | -0.218174989 | 3.241365331 | -3.562844467 | 0.000402235 | -1.43232894  |
| FAM149A        | 0.232430125  | 1.41717966  | 3.560389517  | 0.000405919 | -1.440854328 |
| TPI1           | 0.200600346  | 7.626095121 | 3.55982375   | 0.000406772 | -1.442818293 |
| CALCA          | 0.882359822  | 1.335366714 | 3.558831947  | 0.000408273 | -1.44626046  |
| RP11-1260E13.1 | 0.412750739  | 1.021767155 | 3.558647447  | 0.000408552 | -1.446900686 |
| COX6A1P2       | 0.239194583  | 1.91725696  | 3.556570914  | 0.000411712 | -1.454104223 |
| GREB1          | 0.218036254  | 0.706677363 | 3.554311562  | 0.000415177 | -1.46193742  |
| KRT10          | 0.213475333  | 3.708322464 | 3.553998767  | 0.000415658 | -1.463021512 |
| ANXA8          | -0.218472214 | 0.393716521 | -3.552221107 | 0.000418406 | -1.469180842 |
| TOB1           | 0.281209079  | 4.78608447  | 3.549722241  | 0.000422298 | -1.477834088 |
| NEBL           | -0.261579754 | 2.279214323 | -3.547552461 | 0.000425704 | -1.485343057 |
| DNAJC12        | 0.54067728   | 2.763394548 | 3.54690502   | 0.000426725 | -1.487582814 |
| NME1-NME2      | 0.223784724  | 4.637765897 | 3.545880299  | 0.000428347 | -1.491126942 |
| CAPSL          | -0.365615542 | 0.945193062 | -3.544864568 | 0.000429959 | -1.494639014 |
| GRB14          | 0.325139228  | 1.710377808 | 3.544796692  | 0.000430067 | -1.494873675 |
| RP11-356K23.1  | -0.298024253 | 0.691236204 | -3.542930941 | 0.000433045 | -1.501322235 |
| LAMA5          | 0.31733062   | 3.703179737 | 3.542926721  | 0.000433052 | -1.501336816 |
| KIF14          | 0.213288934  | 1.138080682 | 3.542061236  | 0.00043444  | -1.504327075 |
| CRABP1         | 0.414786589  | 0.889477066 | 3.541657481  | 0.000435089 | -1.505721816 |
| FAM3B          | 0.463674537  | 2.628578149 | 3.538784118  | 0.000439733 | -1.515643262 |
| MT1F           | -0.280556305 | 2.288402146 | -3.53713373  | 0.000442422 | -1.521338429 |
| EHBP1L1        | -0.214775128 | 3.851654466 | -3.53671004  | 0.000443115 | -1.522800094 |
| SCGB3A1        | -0.969070899 | 5.413209781 | -3.534221136 | 0.000447204 | -1.531383065 |
| MIR5572        | 0.212553272  | 0.308771583 | 3.532079215  | 0.000450752 | -1.538764866 |
| LINC00578      | -0.246687737 | 1.293006999 | -3.532048422 | 0.000450803 | -1.538870958 |
| SLC7A5         | 0.4023973    | 4.40105306  | 3.531651943  | 0.000451463 | -1.540236883 |
| CSGALNACT1     | -0.225600533 | 1.961382581 | -3.531262292 | 0.000452112 | -1.541579143 |
| POU6F2         | 0.214944588  | 0.431896976 | 3.53086102   | 0.000452782 | -1.542961291 |

|               |              |             |              |             |              |
|---------------|--------------|-------------|--------------|-------------|--------------|
| MFSD6L        | 0.340315719  | 1.391652745 | 3.530204042  | 0.00045388  | -1.545223868 |
| CLDN5         | -0.310160015 | 2.690480284 | -3.529691931 | 0.000454737 | -1.54698726  |
| RP11-245P10.4 | 0.2407656    | 1.042536795 | 3.524723532  | 0.000463137 | -1.564082697 |
| PRR7          | 0.200022167  | 1.327953963 | 3.523758202  | 0.000464786 | -1.56740158  |
| MIR6835       | 0.227915895  | 0.952067878 | 3.522455344  | 0.00046702  | -1.571879539 |
| RPL36A        | 0.202332682  | 4.171460086 | 3.521536088  | 0.000468602 | -1.575038102 |
| AC009299.3    | 0.206878679  | 1.624433011 | 3.519901568  | 0.000471428 | -1.580652373 |
| SPATA18       | -0.31718168  | 1.41490747  | -3.519664563 | 0.000471839 | -1.581466233 |
| FBXL8         | 0.207888981  | 1.84339492  | 3.518514224  | 0.000473839 | -1.585415695 |
| DLK2          | 0.205806237  | 1.021004618 | 3.516765211  | 0.000476895 | -1.591418231 |
| SEC61G        | 0.206085666  | 5.154232623 | 3.514872011  | 0.000480224 | -1.597912408 |
| PDK3          | -0.204917166 | 2.112889924 | -3.51416083  | 0.00048148  | -1.600351089 |
| GSTA4         | 0.298095659  | 3.473167333 | 3.512807362  | 0.000483879 | -1.60499091  |
| INSL4         | 0.426667427  | 0.581825406 | 3.512559142  | 0.00048432  | -1.605841646 |
| ARVCF         | 0.232088169  | 2.085723814 | 3.512162258  | 0.000485027 | -1.60720179  |
| FZD4          | -0.228270402 | 2.225018495 | -3.511075577 | 0.000486965 | -1.610925159 |
| CYCS          | 0.209447306  | 4.762847295 | 3.511043349  | 0.000487023 | -1.611035567 |
| RP11-190J1.3  | 0.265598785  | 0.62343699  | 3.510768296  | 0.000487514 | -1.611977817 |
| CRIPAK        | 0.230053618  | 1.802934212 | 3.510357493  | 0.00048825  | -1.613384976 |
| PIDD1         | 0.200458297  | 1.961287742 | 3.508455789  | 0.000491668 | -1.619897004 |
| RPS7          | 0.226968132  | 6.369180662 | 3.507421926  | 0.000493536 | -1.623435869 |
| RP11-465B22.8 | 0.311094009  | 1.750024101 | 3.507083981  | 0.000494148 | -1.624592421 |
| CEP131        | 0.216402531  | 2.697307497 | 3.506670985  | 0.000494896 | -1.626005679 |
| TMPRSS13      | 0.290877486  | 2.617974302 | 3.50560858   | 0.000496828 | -1.629640463 |
| HSH2D         | -0.221445766 | 2.873718581 | -3.505119074 | 0.00049772  | -1.631314847 |
| KIF23         | 0.260337234  | 1.811146716 | 3.501431112  | 0.000504489 | -1.643922587 |
| MTL5          | 0.213020843  | 0.81651569  | 3.501310252  | 0.000504713 | -1.644335549 |
| MIR7111       | 0.206750891  | 1.079252014 | 3.499960246  | 0.000507213 | -1.648947396 |
| MLEC          | 0.205318506  | 5.277587676 | 3.498232225  | 0.000510431 | -1.654848135 |
| AGA           | 0.220966233  | 3.736046662 | 3.497497258  | 0.000511805 | -1.657357013 |
| MBOAT2        | -0.26390083  | 2.911085533 | -3.496588488 | 0.000513509 | -1.660458493 |
| TRGJP2        | -0.267395895 | 0.673650308 | -3.496041555 | 0.000514538 | -1.662324713 |
| KLK12         | 0.674817639  | 1.26782669  | 3.493078789  | 0.000520141 | -1.672429299 |

|               |              |             |              |             |              |
|---------------|--------------|-------------|--------------|-------------|--------------|
| PITPNC1       | 0.267453935  | 2.457201417 | 3.492796517  | 0.000520677 | -1.67339157  |
| NOVA1-AS1     | 0.213551798  | 0.438923898 | 3.490619372  | 0.000524835 | -1.680811008 |
| TTLL12        | 0.21120912   | 3.70354231  | 3.490564311  | 0.000524941 | -1.680998592 |
| PLS1          | 0.231929181  | 3.6116731   | 3.488968732  | 0.000528008 | -1.686433244 |
| LINC01207     | 0.322219174  | 1.022135676 | 3.488958821  | 0.000528027 | -1.686466997 |
| CTB-193M12.5  | 0.219424727  | 2.950910189 | 3.486914674  | 0.000531981 | -1.693426028 |
| PLA2G6        | 0.237915828  | 1.606804415 | 3.486298728  | 0.000533178 | -1.695522175 |
| SESN3         | -0.271895849 | 2.648201099 | -3.485445337 | 0.000534841 | -1.698425799 |
| TMSB4Y        | 0.204214492  | 0.468098901 | 3.484470708  | 0.000536745 | -1.7017411   |
| SNORA80B      | 0.30489835   | 0.672139239 | 3.484204906  | 0.000537266 | -1.702645098 |
| CACNA1D       | 0.21428879   | 1.024258281 | 3.48313983   | 0.000539356 | -1.706266789 |
| RP11-638I8.1  | 0.240043351  | 1.585007498 | 3.482758898  | 0.000540106 | -1.707561859 |
| CCNB2         | 0.310004771  | 2.787073312 | 3.481513477  | 0.000542563 | -1.711179502 |
| TARS          | 0.206244534  | 4.19817808  | 3.481494282  | 0.000542601 | -1.711860253 |
| TNRC18        | 0.218832325  | 3.947728822 | 3.479475392  | 0.000546607 | -1.718719319 |
| ABCA4         | -0.402175347 | 1.218136105 | -3.478948643 | 0.000547657 | -1.720508297 |
| WNT3          | 0.214634655  | 1.707323092 | 3.478772279  | 0.000548009 | -1.721107218 |
| ADCY9         | -0.226755716 | 2.271512389 | -3.478144961 | 0.000549262 | -1.723237313 |
| RP11-452F19.3 | 0.204774219  | 2.638290949 | 3.477427191  | 0.000550699 | -1.725674096 |
| DSTNP2        | 0.203039195  | 3.131175508 | 3.476225538  | 0.000553113 | -1.729752557 |
| PAPSS2        | -0.297947187 | 4.175287881 | -3.475954727 | 0.000553659 | -1.730671518 |
| GPRC5B        | -0.234219344 | 1.613616167 | -3.474249843 | 0.000557104 | -1.736455237 |
| SNORD69       | 0.219733825  | 1.173735385 | 3.47352209   | 0.000558581 | -1.738923273 |
| RP11-627G23.1 | 0.25752188   | 0.754375127 | 3.472970034  | 0.000559704 | -1.740795136 |
| TSPAN5        | -0.247401852 | 2.282690498 | -3.472729523 | 0.000560193 | -1.741610553 |
| GAREML        | 0.209509418  | 1.236483735 | 3.470955677  | 0.000563818 | -1.747622843 |
| FLT1          | -0.214718111 | 2.348855255 | -3.47093566  | 0.000563859 | -1.74769067  |
| SERPINB1      | -0.261098851 | 6.007718255 | -3.470600053 | 0.000564547 | -1.748827847 |
| RNF183        | 0.268377265  | 0.714063031 | 3.469973978  | 0.000565833 | -1.750948966 |
| BHLHE40       | -0.273542145 | 6.15951199  | -3.469879063 | 0.000566028 | -1.751270501 |
| PRAME         | 0.565523612  | 1.62581631  | 3.469001254  | 0.000567837 | -1.754243793 |
| MT-ND4        | 0.310108038  | 12.14359427 | 3.468916765  | 0.000568011 | -1.754529936 |
| RUSC1-AS1     | 0.207186823  | 1.501213933 | 3.468291933  | 0.000569302 | -1.756645865 |

|                |              |             |              |             |              |
|----------------|--------------|-------------|--------------|-------------|--------------|
| RP5-857K21.7   | 0.332533403  | 2.010990452 | 3.468085867  | 0.000569728 | -1.757343608 |
| MPZL2          | -0.339156964 | 4.978565003 | -3.467731076 | 0.000570463 | -1.758544842 |
| TPM2           | -0.297560138 | 4.573435573 | -3.467536402 | 0.000570867 | -1.759203911 |
| RP11-1260E13.2 | 0.230536719  | 0.864177561 | 3.466327213  | 0.000573379 | -1.763296825 |
| NOTCH1         | -0.208516607 | 2.656822083 | -3.465111449 | 0.000575915 | -1.767410622 |
| GCNT1          | -0.271968342 | 1.852061988 | -3.462717332 | 0.000580941 | -1.775507612 |
| ATP2B4         | -0.250296792 | 4.176258635 | -3.459763999 | 0.000587196 | -1.785488545 |
| FAM60A         | 0.237522637  | 3.696106311 | 3.457336278  | 0.000592386 | -1.793687069 |
| PLEKHF1        | -0.23967486  | 2.648406511 | -3.456925265 | 0.000593269 | -1.795074536 |
| PCSK1          | 0.52385452   | 0.792099794 | 3.45446236   | 0.000598584 | -1.803385331 |
| SNTN           | -0.261221351 | 0.706431672 | -3.453985957 | 0.000599618 | -1.804992249 |
| ALDOA          | 0.206020421  | 7.749501819 | 3.450411462  | 0.000607424 | -1.817042355 |
| IGLVI-70       | -0.359952833 | 0.979590052 | -3.44786866  | 0.000613035 | -1.825607245 |
| DCLK1          | -0.229297315 | 1.136718657 | -3.447513975 | 0.000613822 | -1.826801451 |
| FOXM1          | 0.34518176   | 2.709044734 | 3.447176307  | 0.000614571 | -1.827938249 |
| ARSJ           | -0.242589463 | 1.790854328 | -3.444059499 | 0.000621531 | -1.83842634  |
| ADCK3          | 0.206961956  | 2.778606964 | 3.443639863  | 0.000622474 | -1.839837727 |
| RAD51          | 0.213304349  | 1.607482137 | 3.44324609   | 0.000623359 | -1.841161978 |
| MAP2           | 0.31614189   | 1.737232569 | 3.443121138  | 0.000623641 | -1.841582161 |
| MARK1          | 0.251573805  | 1.223015946 | 3.441424214  | 0.000627473 | -1.847287044 |
| ZFP36          | -0.352803964 | 6.58025592  | -3.43784272  | 0.000635633 | -1.859318851 |
| D2HGDH         | 0.228913854  | 2.497691148 | 3.431198147  | 0.000651036 | -1.881609244 |
| MVP            | -0.237835791 | 5.923299331 | -3.431143583 | 0.000651164 | -1.881792118 |
| MIR210HG       | 0.23395742   | 1.957886692 | 3.430589584  | 0.000652464 | -1.883648721 |
| RP11-747H7.3   | 0.210611051  | 1.161247283 | 3.430463764  | 0.000652759 | -1.884070337 |
| NRBP2          | 0.264774312  | 3.054066853 | 3.427862093  | 0.000658899 | -1.892785122 |
| URB1-AS1       | 0.212441966  | 2.720520027 | 3.426398668  | 0.000662377 | -1.897684365 |
| ATP6V0E2       | 0.236763749  | 3.477243761 | 3.426076228  | 0.000663145 | -1.898763559 |
| AL590226.1     | 0.239973593  | 0.60533794  | 3.425509991  | 0.000664497 | -1.900658497 |
| RPL39P40       | 0.244320614  | 0.956225064 | 3.425509638  | 0.000664498 | -1.900659679 |
| MTND4P24       | 0.309771801  | 0.730529606 | 3.423196782  | 0.000670045 | -1.908396659 |
| APOLD1         | -0.208251615 | 1.795247374 | -3.423007819 | 0.0006705   | -1.909028559 |
| CTD-2017D11.1  | 0.211928616  | 1.340277391 | 3.420590483  | 0.000676348 | -1.91710929  |

|               |              |             |              |             |              |
|---------------|--------------|-------------|--------------|-------------|--------------|
| SKP2          | 0.241767556  | 2.506582491 | 3.41999149   | 0.000677804 | -1.919110779 |
| TTK           | 0.258773232  | 1.544972664 | 3.41856233   | 0.000681291 | -1.923884852 |
| RP11-46B11.2  | 0.324166863  | 1.039255509 | 3.417514186  | 0.000683859 | -1.927384941 |
| TENM1         | 0.250230216  | 0.476581033 | 3.416813646  | 0.00068558  | -1.929723698 |
| GAA           | -0.235804837 | 5.094228999 | -3.416639143 | 0.000686009 | -1.930306206 |
| PTPRM         | -0.23342078  | 2.505275584 | -3.415710991 | 0.000688297 | -1.933403994 |
| CCDC167       | 0.220447964  | 4.709601532 | 3.412065616  | 0.000697352 | -1.94556297  |
| CHIAP2        | -0.209577173 | 0.34013758  | -3.411346493 | 0.000699152 | -1.947960109 |
| NAT14         | 0.214256063  | 3.186027283 | 3.408487227  | 0.000706349 | -1.957486469 |
| NAPRT         | 0.299164011  | 4.049267267 | 3.408379411  | 0.000706622 | -1.957845536 |
| L1CAM         | -0.227495775 | 0.430976123 | -3.407956325 | 0.000707693 | -1.959254463 |
| GP2           | 0.302179685  | 0.306106266 | 3.407802989  | 0.000708081 | -1.959765051 |
| SGCE          | -0.297348357 | 3.256003112 | -3.406858702 | 0.000710479 | -1.962908902 |
| ZDHHC8P1      | 0.209765816  | 0.757196863 | 3.406075924  | 0.000712472 | -1.965514406 |
| RP11-93B14.10 | -0.218316687 | 1.3479031   | -3.40481849  | 0.000715685 | -1.969698622 |
| CAPN2         | -0.209571512 | 5.755254061 | -3.404537453 | 0.000716405 | -1.970633595 |
| C6orf118      | -0.218065923 | 0.452777608 | -3.403257614 | 0.000719692 | -1.974890516 |
| C1GALT1       | -0.210633906 | 2.912002512 | -3.402808382 | 0.000720849 | -1.976384363 |
| RP11-305L7.1  | 0.204174912  | 1.036725494 | 3.402755062  | 0.000720986 | -1.976561655 |
| BCAS1         | 0.399978031  | 1.546877303 | 3.402591809  | 0.000721407 | -1.977104473 |
| FEN1          | 0.231360016  | 3.764094214 | 3.402083082  | 0.00072272  | -1.978795828 |
| RPS21         | 0.24055416   | 8.344016951 | 3.40162611   | 0.000723902 | -1.98031491  |
| CGN           | 0.310721362  | 4.562544918 | 3.401469685  | 0.000724307 | -1.980834859 |
| SNHG8         | 0.216913565  | 5.142323955 | 3.400898259  | 0.000725788 | -1.982734053 |
| P2RY6         | -0.322417647 | 2.207669162 | -3.399116284 | 0.000730424 | -1.988654686 |
| RP11-390K5.1  | 0.22392144   | 0.87118556  | 3.397653861  | 0.000734249 | -1.993511387 |
| LINC01547     | -0.223542401 | 1.372826595 | -3.393762058 | 0.000744521 | -2.006426336 |
| CYP2S1        | -0.379505627 | 2.822112624 | -3.393305526 | 0.000745734 | -2.00794041  |
| CENPA         | 0.293303716  | 1.846716737 | 3.392871321  | 0.00074689  | -2.009380261 |
| PPIAP29       | 0.345161326  | 2.043036387 | 3.389380592  | 0.000756244 | -2.020949322 |
| CISH          | -0.283251887 | 3.215646921 | -3.389019255 | 0.000757219 | -2.022146225 |
| MYH10         | -0.255420352 | 3.521003442 | -3.386068109 | 0.000765222 | -2.031917126 |
| RDH10         | 0.392166243  | 4.022228218 | 3.384682274  | 0.000769007 | -2.036502658 |

|               |              |             |              |             |              |
|---------------|--------------|-------------|--------------|-------------|--------------|
| FAM154B       | -0.226100871 | 0.69558911  | -3.38340192  | 0.000772519 | -2.040737579 |
| CNGA3         | 0.334080148  | 0.736099078 | 3.380947041  | 0.000779296 | -2.048853094 |
| LINC01564     | 0.272377448  | 0.871775846 | 3.378295781  | 0.000786677 | -2.057611503 |
| KIT           | 0.467494866  | 3.04424417  | 3.376733135  | 0.000791057 | -2.062770613 |
| ATAD2         | 0.25530108   | 2.799109562 | 3.376189632  | 0.000792586 | -2.064564468 |
| CTH           | 0.206856063  | 1.868036967 | 3.375865379  | 0.0007935   | -2.065634547 |
| CCDC64        | 0.271538427  | 2.188652466 | 3.375313781  | 0.000795056 | -2.067454669 |
| OAS3          | -0.290215959 | 3.822803075 | -3.372377177 | 0.000803389 | -2.077139873 |
| CFAP52        | -0.232613163 | 0.616474124 | -3.370875695 | 0.000807681 | -2.082088796 |
| TP63          | -0.321225695 | 1.021274307 | -3.369952543 | 0.00081033  | -2.085130482 |
| SP5           | 0.336847422  | 1.447248847 | 3.369692091  | 0.000811079 | -2.085988501 |
| NCAPG         | 0.272610257  | 1.820861675 | 3.369263979  | 0.000812312 | -2.087398708 |
| TMSB4XP8      | -0.381160088 | 4.615200242 | -3.368268414 | 0.000815184 | -2.09067746  |
| PCOLCE2       | -0.286894251 | 1.248509279 | -3.367662792 | 0.000816937 | -2.092671534 |
| DDX39B        | 0.269765687  | 3.778670861 | 3.365265471  | 0.000823907 | -2.100561608 |
| RFTN1         | -0.27426074  | 3.77124837  | -3.36331753  | 0.000829612 | -2.106968726 |
| CERS4         | 0.322116253  | 3.305064946 | 3.362103112  | 0.000833186 | -2.110961366 |
| ST3GAL1       | -0.291249923 | 3.377140869 | -3.361266025 | 0.000835659 | -2.113712654 |
| TOX3          | 0.382864171  | 2.283625443 | 3.360736224  | 0.000837227 | -2.115453634 |
| ZMYND10       | -0.318806098 | 1.227612791 | -3.359906973 | 0.000839688 | -2.118178113 |
| C1orf53       | 0.248580379  | 2.735145423 | 3.359476083  | 0.000840969 | -2.119593533 |
| PLIN2         | -0.295983211 | 3.850955562 | -3.358670781 | 0.000843368 | -2.122238387 |
| RNA5SP283     | -0.20333148  | 0.947182327 | -3.357341765 | 0.000847342 | -2.126601951 |
| SKA3          | 0.234517702  | 1.599030375 | 3.356442685  | 0.000850039 | -2.129552966 |
| MST1P2        | 0.252464984  | 1.250828173 | 3.355020031  | 0.000854325 | -2.134220949 |
| RP11-434I12.3 | 0.313360592  | 0.87776505  | 3.354745986  | 0.000855152 | -2.135119922 |
| NEURL1        | 0.236565734  | 0.492256244 | 3.354404239  | 0.000856186 | -2.136240886 |
| PHLDA1        | -0.303553583 | 3.33461356  | -3.354106472 | 0.000857087 | -2.137217504 |
| RIPK2         | -0.201681598 | 3.304410093 | -3.350607561 | 0.000867744 | -2.148687023 |
| C1QTNF6       | -0.24724344  | 2.287017337 | -3.349807729 | 0.000870197 | -2.151307286 |
| ITGA3         | -0.336547017 | 5.481643896 | -3.349721858 | 0.000870461 | -2.151588565 |
| MAGEA10       | 0.32321804   | 0.359876822 | 3.347791144  | 0.000876412 | -2.157911    |
| RP11-109L13.1 | -0.202968179 | 0.627091471 | -3.346971393 | 0.000878949 | -2.16059435  |

|               |              |             |              |             |              |
|---------------|--------------|-------------|--------------|-------------|--------------|
| TFF1          | 0.857421302  | 2.271713776 | 3.346051623  | 0.000881805 | -2.163604356 |
| AC005077.14   | 0.246440962  | 0.902190191 | 3.345861079  | 0.000882398 | -2.164227825 |
| PRKAR2B       | -0.267272864 | 2.022825018 | -3.345843102 | 0.000882454 | -2.164286645 |
| CLDN18        | -0.648842526 | 2.401840537 | -3.345179152 | 0.000884522 | -2.166458841 |
| FHOD3         | -0.227594146 | 0.839114373 | -3.343563271 | 0.000889574 | -2.171743682 |
| HEYL          | -0.210688024 | 2.613437363 | -3.342776717 | 0.000892043 | -2.174315271 |
| SDS           | -0.290567622 | 1.883634356 | -3.341596226 | 0.000895761 | -2.178173729 |
| IL1RAP        | -0.209008174 | 1.719362026 | -3.339231102 | 0.000903252 | -2.185900263 |
| IL23A         | -0.238548582 | 1.491407796 | -3.335575609 | 0.000914945 | -2.197831966 |
| RP4-666F24.3  | -0.209773334 | 0.446019413 | -3.335446504 | 0.000915361 | -2.198253143 |
| MT-ND2        | 0.30836051   | 11.26957424 | 3.333774659  | 0.000920757 | -2.203705759 |
| ANO9          | 0.292403401  | 2.633228579 | 3.333773118  | 0.000920762 | -2.203710783 |
| TMEM233       | -0.213718238 | 0.730720775 | -3.33357462  | 0.000921405 | -2.204357997 |
| RP4-639F20.1  | -0.213448477 | 2.347551822 | -3.33343609  | 0.000921854 | -2.204809662 |
| POC1A         | 0.200972833  | 2.331883249 | 3.332662848  | 0.000924363 | -2.207330412 |
| CTNND2        | 0.318103947  | 0.586101964 | 3.332600279  | 0.000924566 | -2.207534361 |
| LGI3          | -0.269060792 | 0.634929156 | -3.32942541  | 0.000934936 | -2.21787831  |
| MLLT11        | 0.302296337  | 1.794793523 | 3.327437284  | 0.000941485 | -2.224350967 |
| RP11-43F13.1  | 0.238025221  | 2.154943349 | 3.327262268  | 0.000942063 | -2.224920582 |
| CDC20         | 0.372659752  | 3.797550343 | 3.325107491  | 0.000949213 | -2.23193127  |
| ALDH3A1       | 0.634888773  | 2.047955581 | 3.322956593  | 0.0009564   | -2.238925005 |
| RP11-304L19.3 | 0.344846432  | 1.562900575 | 3.321306649  | 0.000961948 | -2.244286934 |
| GPX1P1        | -0.285704646 | 1.620944419 | -3.318903464 | 0.000970082 | -2.25209216  |
| CCNB1         | 0.316040207  | 3.816897705 | 3.315528108  | 0.000981613 | -2.263045743 |
| ABHD17C       | 0.29436171   | 3.959041295 | 3.315527849  | 0.000981614 | -2.263046584 |
| CDC6          | 0.281735581  | 2.180086797 | 3.312851303  | 0.000990849 | -2.271724835 |
| RASL10B       | 0.215127016  | 0.794754394 | 3.311469054  | 0.00099565  | -2.27620392  |
| NOTUM         | 0.413482645  | 1.172570337 | 3.311340333  | 0.000996098 | -2.27662094  |
| RORC          | 0.309081628  | 3.148895421 | 3.309923197  | 0.001001044 | -2.281211047 |
| C1orf189      | -0.287216935 | 0.840250416 | -3.309681046 | 0.001001891 | -2.281995185 |
| ABCC2         | 0.440902644  | 0.884170266 | 3.307568729  | 0.001009312 | -2.288833015 |
| CHP1          | 0.210603593  | 5.309114043 | 3.307414271  | 0.001009857 | -2.289332852 |
| HN1           | 0.235222917  | 5.429823314 | 3.305182501  | 0.001017757 | -2.296552507 |



|               |              |             |              |             |              |
|---------------|--------------|-------------|--------------|-------------|--------------|
| TPD52L1       | 0.267358267  | 1.885836862 | 3.304809589  | 0.001019082 | -2.297758402 |
| BEX4          | -0.283535827 | 4.216850038 | -3.30173302  | 0.00103008  | -2.307702217 |
| IRX5          | 0.348190201  | 2.416425246 | 3.301597652  | 0.001030566 | -2.308139535 |
| MT-ND4L       | 0.281096538  | 10.4411212  | 3.299893135  | 0.001036709 | -2.313644694 |
| PKIA          | -0.259512788 | 1.402705469 | -3.298463999 | 0.001041886 | -2.318258342 |
| HOXC13        | 0.258099159  | 0.673685457 | 3.295816181  | 0.001051541 | -2.326801185 |
| MYO10         | 0.208837749  | 3.063936839 | 3.292951131  | 0.001062081 | -2.336037498 |
| RP1-27K12.2   | 0.357809054  | 0.647348893 | 3.29265914   | 0.001063161 | -2.336978385 |
| RP11-845M18.6 | 0.222869035  | 1.08890963  | 3.292327907  | 0.001064387 | -2.338045622 |
| NRGN          | -0.445202485 | 3.756743242 | -3.291503443 | 0.001067444 | -2.340701615 |
| CHEK1         | 0.212342357  | 1.720936059 | 3.290607516  | 0.001070776 | -2.3435871   |
| AMOTL1        | -0.213091561 | 2.18561174  | -3.286726988 | 0.001085318 | -2.356076321 |
| RP11-10A14.5  | 0.27923959   | 0.847506795 | 3.285654405  | 0.001089369 | -2.359525869 |
| TMEM229A      | 0.260379716  | 0.375046419 | 3.285353692  | 0.001090508 | -2.360492804 |
| CBR3          | 0.346253408  | 2.610871024 | 3.281841219  | 0.001103887 | -2.371780781 |
| AC012512.1    | 0.240148964  | 0.308242559 | 3.281745085  | 0.001104255 | -2.372089561 |
| C6orf52       | 0.200519816  | 1.077766671 | 3.280511224  | 0.001108993 | -2.376051944 |
| SFTPA2        | -0.94222275  | 8.159513311 | -3.278589771 | 0.001116408 | -2.3822196   |
| RPS7P1        | 0.255721141  | 3.026753805 | 3.278499013  | 0.001116759 | -2.382510838 |
| RHPN2         | 0.277075691  | 2.900358709 | 3.277291713  | 0.001121443 | -2.386384265 |
| CSAG3         | 0.259150664  | 0.397714313 | 3.275500626  | 0.001128425 | -2.392128165 |
| SPINK4        | 0.397742485  | 0.659524864 | 3.274000813  | 0.001134303 | -2.396935653 |
| FLNC          | -0.327365228 | 1.483042544 | -3.273630277 | 0.00113576  | -2.398123043 |
| MT-CO2        | 0.280484626  | 12.23867031 | 3.273202918  | 0.001137442 | -2.399492362 |
| LY6E          | -0.357452219 | 6.931063124 | -3.271500472 | 0.001144165 | -2.404945541 |
| ZFP42         | 0.271114035  | 0.414521135 | 3.271320227  | 0.001144879 | -2.40552273  |
| VSIG1         | -0.590726621 | 1.987851927 | -3.271169249 | 0.001145478 | -2.406006179 |
| EFNA4         | 0.215269848  | 4.009883662 | 3.268155838  | 0.001157482 | -2.41565097  |
| DEPDC1        | 0.237028252  | 1.345191993 | 3.267453932  | 0.001160295 | -2.417896283 |
| COL2A1        | 0.287871737  | 0.303708849 | 3.265544008  | 0.001167981 | -2.424003565 |
| CGA           | 0.381824142  | 0.398005005 | 3.264864771  | 0.001170725 | -2.426174706 |
| C16orf45      | -0.233292999 | 1.876283478 | -3.261925172 | 0.001182673 | -2.435565977 |
| FGFRL1        | 0.21948911   | 3.434439879 | 3.259368836  | 0.001193155 | -2.443726232 |

|               |              |             |              |             |              |
|---------------|--------------|-------------|--------------|-------------|--------------|
| LRP4          | 0.261194083  | 1.193829826 | 3.258957058  | 0.001194851 | -2.445040123 |
| MT2P1         | -0.225637407 | 1.125164185 | -3.257128646 | 0.001202411 | -2.450872256 |
| TMEM159       | -0.254751914 | 4.529627099 | -3.256759837 | 0.001203941 | -2.452048276 |
| EZH2          | 0.230961987  | 2.368967347 | 3.256279397  | 0.001205937 | -2.453580061 |
| TRPV4         | -0.247524856 | 1.718039071 | -3.256156081 | 0.00120645  | -2.453973194 |
| LRRC4         | -0.272153782 | 1.418715492 | -3.249212079 | 0.001235657 | -2.476087748 |
| MTMR7         | 0.265261954  | 0.707562798 | 3.247827611  | 0.001241558 | -2.480491453 |
| EPPK1         | 0.207125701  | 1.291940984 | 3.247036439  | 0.001244941 | -2.483007198 |
| ALG1L         | 0.38260142   | 2.751972932 | 3.242130833  | 0.001266114 | -2.49859279  |
| CTD-2600O9.1  | 0.211823526  | 0.916750801 | 3.242006473  | 0.001266655 | -2.498987601 |
| AKR1B10       | 0.782070409  | 2.181688732 | 3.241222214  | 0.001270072 | -2.501477082 |
| RP11-3P17.3   | 0.240653579  | 2.684315122 | 3.238465506  | 0.001282151 | -2.51022315  |
| RP11-304L19.1 | 0.32248899   | 1.538973142 | 3.237602528  | 0.001285954 | -2.512959612 |
| AQP7          | 0.223184788  | 0.806194104 | 3.236300496  | 0.001291711 | -2.517086969 |
| KISS1R        | 0.242512439  | 0.783199362 | 3.23373427   | 0.001303129 | -2.525217076 |
| SCD5          | -0.291535321 | 2.064989758 | -3.233204523 | 0.001305497 | -2.526894609 |
| XK            | 0.217058331  | 1.120808268 | 3.231527601  | 0.001313021 | -2.532203122 |
| DBN1          | 0.230732437  | 4.37774813  | 3.231414674  | 0.00131353  | -2.532560513 |
| TUBB4A        | 0.242867076  | 0.687108565 | 3.230572925  | 0.001317323 | -2.535224094 |
| PLEKHG6       | 0.240719914  | 1.924636898 | 3.230173647  | 0.001319126 | -2.536487311 |
| IDI1          | 0.200039751  | 4.123028583 | 3.228428334  | 0.001327033 | -2.542007302 |
| CTD-2547H18.1 | 0.295278728  | 1.084939857 | 3.228206214  | 0.001328043 | -2.542709609 |
| LINC00665     | 0.291653189  | 1.774975078 | 3.227634375  | 0.001330645 | -2.544517452 |
| JSRP1         | -0.314175896 | 1.548871852 | -3.227278623 | 0.001332266 | -2.545641991 |
| CELF3         | 0.238002338  | 0.337671848 | 3.226493881  | 0.001335849 | -2.548122156 |
| HCG4B         | -0.239132517 | 1.320955664 | -3.226234833 | 0.001337033 | -2.548940745 |
| SH3PXD2B      | -0.232175754 | 3.156504961 | -3.226070826 | 0.001337784 | -2.549458975 |
| PRR29         | -0.224506552 | 1.280187836 | -3.224364063 | 0.001345617 | -2.554850497 |
| C6orf222      | -0.202851293 | 0.446195106 | -3.219104251 | 0.001370025 | -2.571448596 |
| PLEKHB1       | 0.292053966  | 2.850969573 | 3.218898937  | 0.001370986 | -2.572095966 |
| RASSF7        | 0.254402022  | 4.645793665 | 3.216069531  | 0.001384294 | -2.581013269 |
| PHGDH         | 0.35762617   | 2.260024087 | 3.215535727  | 0.001386818 | -2.582694792 |
| PPP1R14C      | -0.391425805 | 2.768599359 | -3.213376696 | 0.00139707  | -2.589493164 |

|              |              |             |              |             |              |
|--------------|--------------|-------------|--------------|-------------|--------------|
| KLB          | 0.20649523   | 0.406094098 | 3.211139688  | 0.001407766 | -2.596532454 |
| MYOZ1        | -0.204295671 | 0.995608269 | -3.210592513 | 0.001410394 | -2.598253558 |
| RPL4P4       | 0.224298943  | 1.802760684 | 3.210539319  | 0.001410649 | -2.598420861 |
| B4GALNT2     | 0.26141387   | 0.519844942 | 3.208708085  | 0.001419478 | -2.604178749 |
| FREM2        | 0.203382623  | 0.902540038 | 3.208442394  | 0.001420763 | -2.60501389  |
| ERO1LB       | 0.310809098  | 2.216827032 | 3.208134518  | 0.001422254 | -2.605981548 |
| PGF          | -0.208489447 | 1.42304382  | -3.207672823 | 0.001424492 | -2.607432494 |
| AC092171.4   | 0.216218827  | 2.243218095 | 3.207658584  | 0.001424561 | -2.60747724  |
| SLC2A4RG     | 0.201285053  | 4.911429659 | 3.20683305   | 0.001428571 | -2.610071094 |
| ERVMER34-1   | 0.225019047  | 0.944422103 | 3.204343966  | 0.001440725 | -2.617887998 |
| RP11-303G3.6 | -0.223434519 | 0.864208567 | -3.204247816 | 0.001441197 | -2.618189839 |
| HLF          | -0.322981286 | 1.622694336 | -3.204179355 | 0.001441532 | -2.618404748 |
| PRKAG2-AS1   | 0.214666509  | 1.437920042 | 3.203172158  | 0.00144648  | -2.621566014 |
| RARG         | -0.205259544 | 2.845268644 | -3.202990356 | 0.001447375 | -2.62213653  |
| RP5-875H18.9 | -0.252595962 | 0.863235959 | -3.202875267 | 0.001447942 | -2.622497678 |
| PTPRE        | -0.218888335 | 2.645787338 | -3.202611607 | 0.001449241 | -2.623324992 |
| CFAP221      | -0.2413582   | 1.201178763 | -3.202495369 | 0.001449814 | -2.623689701 |
| SCG3         | 0.264058298  | 0.359581377 | 3.201120678  | 0.001456606 | -2.628001999 |
| PLCXD1       | 0.279281645  | 2.461487923 | 3.197658464  | 0.001473845 | -2.638854819 |
| GPNPAT1      | 0.208449598  | 3.374100331 | 3.196582379  | 0.001479241 | -2.642225672 |
| MCIDAS       | 0.212320408  | 0.930010798 | 3.195905554  | 0.001482645 | -2.644345277 |
| KLK13        | 0.384796144  | 0.930512429 | 3.195655311  | 0.001483905 | -2.645128851 |
| TIMM8AP1     | -0.360078961 | 1.671598879 | -3.193285408 | 0.001495888 | -2.6525467   |
| PMM1         | 0.220774523  | 3.136825266 | 3.193118479  | 0.001496736 | -2.653068993 |
| MAGEA3       | 0.533122982  | 1.042251631 | 3.188573263  | 0.001519981 | -2.667280128 |
| HMGA1        | 0.301882383  | 6.536767919 | 3.184681293  | 0.001540151 | -2.679433376 |
| IGF1R        | 0.234135929  | 2.646248805 | 3.184401703  | 0.001541609 | -2.680305888 |
| SEMA3A       | -0.30969041  | 1.429643134 | -3.182912986 | 0.001549396 | -2.684950465 |
| SNORD19      | 0.24632818   | 1.845637218 | 3.181903017  | 0.0015547   | -2.688100233 |
| FKBP5        | -0.287562091 | 3.164883241 | -3.180824251 | 0.001560383 | -2.691463496 |
| C1QTNF3      | -0.253674576 | 1.471730799 | -3.180459635 | 0.001562308 | -2.692600011 |
| AC006042.6   | 0.252244947  | 2.043356438 | 3.180131032  | 0.001564045 | -2.693624165 |
| GPR39        | 0.227242408  | 2.315576579 | 3.179951399  | 0.001564996 | -2.694183982 |

|              |              |             |              |             |              |
|--------------|--------------|-------------|--------------|-------------|--------------|
| COL17A1      | -0.506772886 | 2.19817492  | -3.179566494 | 0.001567034 | -2.695383418 |
| CHCHD2       | 0.203376165  | 7.501695662 | 3.178942106  | 0.001570345 | -2.69732883  |
| KIF26B       | -0.233851584 | 1.95147641  | -3.178850332 | 0.001570832 | -2.697614742 |
| ATP2C2       | 0.278513809  | 2.294221786 | 3.174961661  | 0.001591606 | -2.709722124 |
| GPR115       | -0.292897601 | 1.130997612 | -3.171306028 | 0.001611366 | -2.721090964 |
| NCS1         | -0.211863476 | 2.276515472 | -3.171210293 | 0.001611886 | -2.721388526 |
| CDCA8        | 0.28128377   | 2.935158442 | 3.171135811  | 0.001612291 | -2.721620026 |
| LINC01508    | 0.207626757  | 0.777257638 | 3.171102957  | 0.00161247  | -2.721722136 |
| JAG2         | 0.243788901  | 2.621956164 | 3.170887389  | 0.001613643 | -2.722392109 |
| RP11-76C10.6 | 0.371992156  | 1.895012941 | 3.170150891  | 0.001617657 | -2.724680768 |
| IRX3         | 0.368891449  | 3.800686264 | 3.166426928  | 0.001638092 | -2.736245134 |
| ATAD3C       | 0.247450681  | 1.828241537 | 3.161484135  | 0.001665584 | -2.751574282 |
| BMP4         | -0.327977639 | 2.265751004 | -3.160125343 | 0.001673216 | -2.75578429  |
| GAS2L2       | -0.223171517 | 0.665428259 | -3.157106748 | 0.001690286 | -2.765130721 |
| NDC80        | 0.254727841  | 1.909852889 | 3.156400011  | 0.001694305 | -2.767317741 |
| PRKDC        | 0.218194894  | 3.857967038 | 3.155461894  | 0.001699655 | -2.770220048 |
| GALNT18      | -0.22397144  | 3.014165498 | -3.153353105 | 0.001711736 | -2.776741105 |
| MPP7         | 0.216383867  | 3.08857129  | 3.151762518  | 0.001720902 | -2.781656942 |
| CAMK1D       | -0.293458095 | 2.726948967 | -3.149294138 | 0.001735214 | -2.789280951 |
| PTGR1        | 0.306690746  | 3.683911523 | 3.147928534  | 0.00174318  | -2.793496384 |
| MIR4292      | 0.255470328  | 2.366597593 | 3.147658021  | 0.001744762 | -2.794331211 |
| ENTPD2       | 0.243244014  | 1.151411195 | 3.147504321  | 0.001745661 | -2.794805513 |
| MIR25        | 0.285182619  | 2.209037355 | 3.146639276  | 0.001750731 | -2.797474537 |
| RN7SL2       | -0.435413899 | 7.39340146  | -3.143713889 | 0.001767977 | -2.806495341 |
| ASCL1        | 0.604656488  | 1.026531472 | 3.143592263  | 0.001768697 | -2.806870216 |
| KSR1         | 0.234252021  | 2.104149987 | 3.143014975  | 0.00177212  | -2.808649338 |
| ALDH3B2      | 0.338746857  | 1.843115249 | 3.140545857  | 0.00178683  | -2.816255279 |
| TMSB4XP1     | -0.221193674 | 1.436424397 | -3.139230435 | 0.001794712 | -2.820304999 |
| PRDX2        | 0.206187675  | 5.973654449 | 3.13685992   | 0.001808998 | -2.827598857 |
| IQGAP3       | 0.260694861  | 2.300610991 | 3.134252264  | 0.001824834 | -2.835616259 |
| GABRE        | -0.302268569 | 1.531049816 | -3.13420493  | 0.001825122 | -2.835761731 |
| INSM1        | 0.284926033  | 0.302962096 | 3.13303069   | 0.001832296 | -2.839369863 |
| UPK3B        | -0.357083301 | 1.409699751 | -3.132758959 | 0.00183396  | -2.840204637 |

|               |              |             |              |             |              |
|---------------|--------------|-------------|--------------|-------------|--------------|
| PPDPF         | 0.236115816  | 7.645095701 | 3.132262898  | 0.001837001 | -2.841728384 |
| SNTA1         | 0.236003843  | 3.453096487 | 3.127791248  | 0.001864622 | -2.855453452 |
| MT-RNR2       | 0.262495136  | 11.54830773 | 3.125919617  | 0.001876297 | -2.861192552 |
| CA2           | -0.372415946 | 2.888773277 | -3.125185782 | 0.001880893 | -2.863441852 |
| AL590431.1    | 0.243353173  | 2.114733    | 3.125141124  | 0.001881173 | -2.863578721 |
| ZP3           | 0.215796604  | 1.638203454 | 3.124909214  | 0.001882627 | -2.86428944  |
| LAGE3         | 0.20916941   | 4.537668764 | 3.122214218  | 0.001899609 | -2.872544906 |
| PKMYT1        | 0.214122852  | 1.639311115 | 3.117158054  | 0.001931849 | -2.888014761 |
| ZFAS1         | 0.225266678  | 5.331647792 | 3.116654213  | 0.001935089 | -2.889554991 |
| LINC00086     | 0.254849951  | 1.351902838 | 3.115610541  | 0.001941817 | -2.892744717 |
| PPM1H         | 0.253042208  | 2.161293015 | 3.115451878  | 0.001942841 | -2.89322954  |
| BEAN1         | -0.212207994 | 1.084671767 | -3.114283673 | 0.001950401 | -2.896798477 |
| HIST3H2A      | 0.430782486  | 2.687842743 | 3.113945419  | 0.001952595 | -2.897831621 |
| ATP6V0A4      | 0.321022411  | 1.142054816 | 3.108196829  | 0.00199023  | -2.915373316 |
| CDCA5         | 0.282821579  | 2.532704242 | 3.106326448  | 0.002002619 | -2.921074021 |
| TPPP3         | -0.412500985 | 3.386670995 | -3.104666296 | 0.002013674 | -2.926131208 |
| RP11-16E12.2  | -0.215188556 | 1.507968833 | -3.097582605 | 0.00206148  | -2.947680459 |
| RP11-66N24.6  | 0.404337333  | 1.857764896 | 3.096611512  | 0.002068115 | -2.950630926 |
| APOD          | -0.506806573 | 3.661850027 | -3.094046092 | 0.002085736 | -2.95842114  |
| SLC16A3       | -0.27557287  | 4.237084812 | -3.093542722 | 0.00208921  | -2.959948958 |
| NXN           | -0.218417872 | 3.378976991 | -3.093359729 | 0.002090474 | -2.960504315 |
| FGG           | 0.845149936  | 4.002112372 | 3.093237113  | 0.002091322 | -2.960876417 |
| SYBU          | 0.309088334  | 1.820622108 | 3.092404027  | 0.002097088 | -2.963404215 |
| AFAP1-AS1     | -0.482486303 | 2.79325095  | -3.088223459 | 0.002126245 | -2.976079239 |
| RP11-302F12.1 | -0.399158306 | 2.57764416  | -3.088162623 | 0.002126672 | -2.976263566 |
| FKBP1B        | 0.211663772  | 1.633079079 | 3.08603186   | 0.002141679 | -2.982717337 |
| IFI6          | -0.39528805  | 7.478270446 | -3.080230256 | 0.002183033 | -3.00026782  |
| MT1G          | -0.362952052 | 2.158409901 | -3.080215517 | 0.002183139 | -3.000312368 |
| DUSP4         | 0.425932024  | 3.148957523 | 3.079848747  | 0.002185778 | -3.001420812 |
| IFITM3        | -0.215359902 | 8.300135576 | -3.079043227 | 0.002191585 | -3.003854794 |
| RP11-323H21.3 | 0.214340166  | 0.222604644 | 3.078619261  | 0.002194646 | -3.005135618 |
| RP11-93B14.9  | -0.226349791 | 1.87564513  | -3.078485274 | 0.002195615 | -3.005540362 |
| JUN           | -0.249733014 | 5.767456618 | -3.077503861 | 0.00220272  | -3.008504484 |

|              |              |             |              |             |              |
|--------------|--------------|-------------|--------------|-------------|--------------|
| EREG         | -0.461578802 | 1.298731561 | -3.076980669 | 0.002206516 | -3.010084286 |
| FGFBP1       | -0.454763899 | 2.062851842 | -3.074088463 | 0.002227612 | -3.018812776 |
| KLF15        | 0.274851854  | 1.594777676 | 3.073973413  | 0.002228455 | -3.019159826 |
| C2           | -0.319940457 | 3.632476716 | -3.072041287 | 0.002242656 | -3.024986246 |
| SCD          | 0.291532676  | 6.046474418 | 3.071615698  | 0.002245795 | -3.026269155 |
| SPOCK1       | -0.314323133 | 1.262247905 | -3.066486558 | 0.002283947 | -3.041717155 |
| RP11-664D7.4 | -0.338644146 | 1.631623594 | -3.065945135 | 0.002288009 | -3.043346368 |
| GSPT2        | -0.225720525 | 2.103566038 | -3.065493073 | 0.002291405 | -3.044706469 |
| GGTLC1       | -0.511478278 | 2.543333973 | -3.065087673 | 0.002294455 | -3.045926017 |
| GIGYF1       | 0.200070601  | 3.498507899 | 3.063442062  | 0.002306873 | -3.050874843 |
| LILRP1       | 0.236508502  | 0.234793628 | 3.060951124  | 0.002325788 | -3.058360944 |
| TDRD5        | 0.217704161  | 0.695943363 | 3.059835618  | 0.002334305 | -3.061711151 |
| TTYH3        | -0.222257583 | 4.625626872 | -3.055203977 | 0.002369974 | -3.075610666 |
| WBSCR17      | -0.200885955 | 0.894676461 | -3.054928784 | 0.002372109 | -3.076435858 |
| FAM171A2     | 0.21537302   | 1.142410795 | 3.05445256   | 0.002375808 | -3.077863694 |
| CKB          | 0.372014374  | 4.885795486 | 3.053619644  | 0.002382229 | -3.080360461 |
| CENPU        | 0.240250722  | 2.503933739 | 3.053548325  | 0.002382846 | -3.080574217 |
| CAT          | -0.202224377 | 4.737821447 | -3.05336506  | 0.002384274 | -3.081123476 |
| TMC4         | 0.236723193  | 5.046774241 | 3.052092083  | 0.00239422  | -3.084937805 |
| ERVH48-1     | 0.309757742  | 0.456154222 | 3.051445804  | 0.002399284 | -3.086873719 |
| LPHN2        | -0.228405618 | 2.340738528 | -3.050998367 | 0.002402795 | -3.088213777 |
| SEMA4B       | 0.238264592  | 4.743855151 | 3.049455835  | 0.002414937 | -3.092832149 |
| C6           | -0.209567829 | 0.578562424 | -3.049201912 | 0.002416942 | -3.093592184 |
| FZD10        | 0.333413658  | 0.788362817 | 3.04821737   | 0.002424727 | -3.096538509 |
| SRPK3        | 0.212024628  | 1.011019392 | 3.047325679  | 0.002431798 | -3.099206181 |
| WNT7A        | -0.207687619 | 0.512082097 | -3.046900479 | 0.002435176 | -3.100477988 |
| HILPDA       | 0.305617341  | 3.406847551 | 3.045340029  | 0.002447612 | -3.105143947 |
| CTD-2589M5.4 | 0.337356198  | 1.439660699 | 3.04488419   | 0.002451256 | -3.106506533 |
| H19          | 0.592627756  | 2.384344019 | 3.044149856  | 0.002457136 | -3.108701181 |
| GMDS         | 0.201318409  | 2.932110584 | 3.038235154  | 0.002504972 | -3.126359389 |
| ITGB1        | -0.207458355 | 5.895097941 | -3.0358064   | 0.002524862 | -3.133600797 |
| FOSB         | -0.502719808 | 2.852220584 | -3.030328078 | 0.002570258 | -3.149914104 |
| SLC44A3      | 0.210355333  | 3.14462824  | 3.029595138  | 0.002576388 | -3.152094493 |

|             |              |             |              |             |              |
|-------------|--------------|-------------|--------------|-------------|--------------|
| MAGEA12     | 0.406279046  | 0.713682003 | 3.027829379  | 0.002591211 | -3.157345283 |
| XIST        | -0.377729326 | 1.231252535 | -3.027506208 | 0.002593932 | -3.158305966 |
| FAM46A      | 0.250686953  | 3.196190724 | 3.02528212   | 0.002612732 | -3.164914798 |
| SYT8        | -0.330579414 | 1.209595004 | -3.024389413 | 0.002620313 | -3.167566141 |
| CEBPD       | 0.278357685  | 5.382008451 | 3.02365852   | 0.002626535 | -3.169736334 |
| HOTAIRM1    | -0.242082271 | 1.522090585 | -3.023582052 | 0.002627187 | -3.169963356 |
| CACNG6      | -0.230487627 | 0.550225562 | -3.023233433 | 0.00263016  | -3.170998287 |
| RP1-27K12.4 | 0.208896631  | 0.62158163  | 3.023145924  | 0.002630907 | -3.171258053 |
| TST         | 0.249354422  | 4.601125842 | 3.018075389  | 0.002674511 | -3.186297288 |
| MIR3682     | 0.223290261  | 1.896992002 | 3.017930312  | 0.002675769 | -3.186727228 |
| MMP1        | -0.581264169 | 4.040723501 | -3.01588925  | 0.002693515 | -3.192773882 |
| ZSCAN31     | 0.244979249  | 2.193468232 | 3.014005396  | 0.00270999  | -3.198351303 |
| LOXL4       | -0.316589327 | 2.110612261 | -3.013776434 | 0.002711999 | -3.19902895  |
| EPHB3       | 0.24708409   | 2.772057769 | 3.013723566  | 0.002712463 | -3.199185413 |
| KIF11       | 0.24139816   | 2.505507142 | 3.010138013  | 0.002744101 | -3.209790726 |
| PLK1        | 0.254921169  | 2.490350283 | 3.009232377  | 0.002752146 | -3.212467482 |
| ACSL5       | -0.335139347 | 5.117979631 | -3.00389336  | 0.002800013 | -3.228232036 |
| HIF3A       | 0.276561229  | 1.14708105  | 3.001470617  | 0.002821984 | -3.235376781 |
| CDCA7       | 0.293869511  | 2.631601437 | 3.000936391  | 0.00282685  | -3.236951484 |
| FOXQ1       | -0.445769651 | 3.043586727 | -3.000523108 | 0.00283062  | -3.238169505 |
| C7orf57     | -0.221539887 | 0.909187357 | -3.000206913 | 0.002833507 | -3.239101279 |
| TM4SF5      | 0.372958808  | 0.60928673  | 2.998065999  | 0.002853127 | -3.245407715 |
| TMEM45B     | 0.300274635  | 4.055235208 | 2.993772035  | 0.002892854 | -3.258043246 |
| FADS1       | 0.21967492   | 2.821343202 | 2.992247777  | 0.002907077 | -3.262524368 |
| RN7SKP51    | -0.200319205 | 0.72647079  | -2.985101945 | 0.002974615 | -3.28350284  |
| HOXC9       | 0.224392532  | 0.773270167 | 2.984845977  | 0.002977061 | -3.284253403 |
| LINC00942   | 0.384054451  | 0.866071903 | 2.98136105   | 0.003010541 | -3.294465926 |
| EIF4EBP1    | 0.293190223  | 5.017262298 | 2.974939225  | 0.003073141 | -3.313254831 |
| MT1X        | -0.29227149  | 3.747694828 | -2.973963259 | 0.003082759 | -3.31610688  |
| HOXC11      | 0.230852064  | 0.615540349 | 2.973645148  | 0.003085899 | -3.317036296 |
| CFAP43      | -0.205644869 | 0.698413198 | -2.973566374 | 0.003086677 | -3.317266433 |
| ARHGAP11A   | 0.207319106  | 1.76369804  | 2.973497498  | 0.003087358 | -3.317467647 |
| NUSAP1      | 0.253327041  | 3.316251863 | 2.968774014  | 0.003134358 | -3.331256157 |

|               |              |             |              |             |              |
|---------------|--------------|-------------|--------------|-------------|--------------|
| CCDC78        | -0.231435944 | 1.103922687 | -2.967751074 | 0.003144622 | -3.334239475 |
| GRAMD2        | 0.257335672  | 2.117900112 | 2.96303503   | 0.003192342 | -3.347980584 |
| IGKV1D-13     | -0.459939267 | 1.984364675 | -2.962500542 | 0.003197792 | -3.349536589 |
| KIF12         | 0.33471347   | 1.956692936 | 2.961630513  | 0.003206682 | -3.352068842 |
| MSMB          | 0.777484803  | 3.228039716 | 2.959717615  | 0.003226306 | -3.357633879 |
| DYNLRB2       | -0.204759654 | 0.689857351 | -2.959074699 | 0.003232926 | -3.359503483 |
| AC137932.5    | 0.233279197  | 1.586005397 | 2.956296482  | 0.003261677 | -3.36757805  |
| SMOC1         | 0.434278112  | 1.493834399 | 2.95175719   | 0.003309155 | -3.38075522  |
| OLFML2A       | -0.215762992 | 2.072067783 | -2.949236765 | 0.003335789 | -3.388063356 |
| LRRC56        | 0.20457657   | 1.838136982 | 2.943705821  | 0.003394924 | -3.404079555 |
| MAGEA6        | 0.457460669  | 0.91304859  | 2.942757645  | 0.003405157 | -3.406822316 |
| CTD-2147F2.1  | 0.208788728  | 0.39087077  | 2.942207058  | 0.003411112 | -3.408414592 |
| EDARADD       | 0.210524929  | 0.7848362   | 2.942080819  | 0.003412479 | -3.408779628 |
| ARRDC3        | -0.236813771 | 5.053508603 | -2.94180251  | 0.003415494 | -3.409584346 |
| CHL1          | 0.29920908   | 1.581817232 | 2.941074013  | 0.003423397 | -3.411690406 |
| ANKS4B        | 0.238529694  | 0.468585283 | 2.940554858  | 0.003429039 | -3.413190958 |
| TLE2          | 0.227525301  | 3.498632894 | 2.938561252  | 0.003450785 | -3.418950851 |
| RIMKLB        | 0.261805808  | 2.138244783 | 2.937418154  | 0.003463311 | -3.42225177  |
| PBLD          | 0.20976098   | 1.60639221  | 2.936336891  | 0.003475197 | -3.425372987 |
| SMIM1         | 0.226397225  | 2.069613704 | 2.933232061  | 0.003509535 | -3.434329339 |
| TFPI2         | -0.647436182 | 3.653781814 | -2.932361405 | 0.00351922  | -3.436839238 |
| ZNF710        | 0.246203283  | 3.257756539 | 2.930052511  | 0.003545021 | -3.443491749 |
| RP11-909N17.2 | 0.206345546  | 0.566815829 | 2.926386235  | 0.003586344 | -3.454044827 |
| CCDC17        | -0.253897588 | 1.047685708 | -2.925982607 | 0.00359092  | -3.455205857 |
| MT1A          | -0.336768833 | 1.46295402  | -2.923318946 | 0.003621253 | -3.462863962 |
| CTD-3128G10.7 | -0.23633506  | 1.002123725 | -2.923066864 | 0.003624136 | -3.463588359 |
| MCM2          | 0.243087217  | 3.421380985 | 2.922789077  | 0.003627315 | -3.464386548 |
| MT-ND1        | 0.273349835  | 11.2296548  | 2.919804328  | 0.003661635 | -3.472958284 |
| TMEM238       | 0.21248983   | 2.37554896  | 2.917988416  | 0.003682659 | -3.478169161 |
| ZC3H12A       | -0.225958768 | 3.202627759 | -2.916674243 | 0.003697943 | -3.48193831  |
| MACROD2       | -0.258562359 | 1.10778067  | -2.90970306  | 0.003779991 | -3.50190477  |
| RP11-359M6.1  | 0.200854856  | 0.567288234 | 2.90866977   | 0.003792293 | -3.504860332 |
| HLA-K         | -0.289869592 | 2.474231699 | -2.908667547 | 0.003792319 | -3.504866688 |



|               |              |             |              |             |              |
|---------------|--------------|-------------|--------------|-------------|--------------|
| IL37          | -0.520181976 | 1.663908802 | -2.907967268 | 0.003800677 | -3.506869146 |
| PRSS8         | 0.262146376  | 6.19909617  | 2.907153263  | 0.003810413 | -3.509196219 |
| MAPK8IP2      | 0.228123111  | 1.205746184 | 2.906775951  | 0.003814934 | -3.510274662 |
| FOXD3-AS1     | 0.216252634  | 0.765273357 | 2.90614576   | 0.003822495 | -3.512075591 |
| ROPN1L        | -0.244269377 | 0.873933619 | -2.902652169 | 0.003864661 | -3.522052556 |
| LA16c-312E8.4 | 0.231510146  | 0.485645816 | 2.90203072   | 0.003872206 | -3.523826068 |
| CAPN12        | 0.202255284  | 1.454468181 | 2.901251061  | 0.003881691 | -3.526050567 |
| CALML3        | 0.247159122  | 0.325732528 | 2.8943534    | 0.003966529 | -3.545705592 |
| EPHX1         | 0.331418235  | 6.729470704 | 2.89250658   | 0.003989529 | -3.550960467 |
| RP11-12G12.7  | 0.215582056  | 2.677391172 | 2.888223181  | 0.004043341 | -3.563135813 |
| HOXB2         | -0.319223658 | 2.020588845 | -2.884153995 | 0.004095074 | -3.574686109 |
| IGFBP5        | -0.335285902 | 5.551787449 | -2.881931441 | 0.004123584 | -3.58098813  |
| USP9Y         | 0.2303606    | 0.703373621 | 2.876995901  | 0.004187541 | -3.594965988 |
| RP11-234A1.1  | 0.247968738  | 3.559757145 | 2.870673514  | 0.004270789 | -3.612837654 |
| TRIM17        | 0.225484686  | 1.015917532 | 2.86738538   | 0.004314676 | -3.622117281 |
| CIB2          | 0.221999679  | 1.808066019 | 2.866806039  | 0.004322451 | -3.623751208 |
| BIK           | 0.26587431   | 2.869094429 | 2.865610848  | 0.004338531 | -3.627121014 |
| LINC00958     | 0.218416521  | 0.51659949  | 2.865178336  | 0.004344364 | -3.628340133 |
| MTND2P28      | 0.349561186  | 6.633096583 | 2.86456763   | 0.004352611 | -3.630061228 |
| PPBP          | -0.282334989 | 0.876879546 | -2.86443058  | 0.004354464 | -3.630447411 |
| GOLGA2P10     | 0.218950483  | 2.187144125 | 2.863517045  | 0.004366833 | -3.633021154 |
| RET           | 0.293966728  | 0.77044254  | 2.860425206  | 0.004408931 | -3.641726039 |
| TSPAN12       | 0.226386203  | 3.584318857 | 2.860053803  | 0.004414013 | -3.64277109  |
| PIP           | -0.360545317 | 1.253186368 | -2.858024776 | 0.00444187  | -3.64847803  |
| CSF3R         | -0.316758875 | 2.536688852 | -2.857790875 | 0.004445091 | -3.649135659 |
| C2orf72       | 0.250177606  | 0.899532901 | 2.851088888  | 0.004538304 | -3.667956647 |
| RRAGD         | -0.216884994 | 2.515193945 | -2.847766947 | 0.004585161 | -3.677269705 |
| LSR           | 0.21374864   | 6.332065149 | 2.847273647  | 0.004592156 | -3.678651773 |
| HS3ST1        | -0.225261589 | 1.823310397 | -2.845812719 | 0.004612931 | -3.682743471 |
| NR1D1         | -0.216458174 | 2.979257055 | -2.845488282 | 0.004617556 | -3.683651862 |
| EDN2          | -0.337814572 | 1.68396405  | -2.845063306 | 0.004623621 | -3.684841599 |
| ST6GALNAC2    | -0.205820708 | 1.444257486 | -2.843979147 | 0.004639125 | -3.687875971 |
| RP11-76C10.5  | 0.311106529  | 1.672252354 | 2.839331714  | 0.004706125 | -3.700870644 |

|               |              |             |              |             |              |
|---------------|--------------|-------------|--------------|-------------|--------------|
| BIRC5         | 0.309292097  | 3.174583943 | 2.837519107  | 0.004732493 | -3.705933291 |
| VEGFA         | 0.247394796  | 4.248469568 | 2.835328817  | 0.004764535 | -3.712046641 |
| TDRP          | 0.210012223  | 2.8787784   | 2.828861351  | 0.004860301 | -3.7300714   |
| EIF1AY        | 0.31977468   | 1.041887203 | 2.825391121  | 0.004912402 | -3.739726466 |
| RP11-175B9.3  | 0.212855087  | 3.40243804  | 2.822745948  | 0.004952456 | -3.747078303 |
| DLC1          | -0.269736315 | 2.690065513 | -2.821288025 | 0.004974659 | -3.751127518 |
| DEPDC1B       | 0.200334791  | 1.44533337  | 2.819249539  | 0.005005854 | -3.756785785 |
| BRINP1        | -0.314978666 | 0.868454017 | -2.814599181 | 0.005077685 | -3.769679052 |
| ST14          | 0.203842634  | 6.091568444 | 2.81317136   | 0.005099927 | -3.773633596 |
| RNY3P8        | 0.254296286  | 1.202435678 | 2.811997431  | 0.005118279 | -3.776883494 |
| RP11-359M6.2  | 0.214493918  | 0.802296663 | 2.811752173  | 0.005122121 | -3.7775623   |
| HMGCS1        | 0.2060152    | 3.691270661 | 2.804514422  | 0.005236678 | -3.797568538 |
| ELFN2         | -0.22686348  | 1.180862611 | -2.8037007   | 0.005249702 | -3.799814665 |
| HIST1H2BK     | 0.271319534  | 6.004259455 | 2.799098811  | 0.005323908 | -3.812505431 |
| CTAG2         | 0.303895619  | 0.42231145  | 2.798513718  | 0.005333411 | -3.814117512 |
| RP11-475C16.1 | 0.223644989  | 3.562440472 | 2.797957005  | 0.005342466 | -3.815651097 |
| KRT5          | -0.393505447 | 1.202212968 | -2.795079121 | 0.005389502 | -3.823574123 |
| ID1           | 0.343772877  | 5.041873408 | 2.793100148  | 0.005422064 | -3.829017796 |
| SPRR2D        | -0.345150585 | 0.770162043 | -2.792400714 | 0.005433615 | -3.830940877 |
| LYPD6B        | 0.255379839  | 1.086446558 | 2.789479922  | 0.005482092 | -3.838966492 |
| LRRN1         | -0.293961756 | 1.481169803 | -2.782003626 | 0.005607966 | -3.859472419 |
| DRC1          | -0.222624913 | 0.769628283 | -2.780798614 | 0.005628497 | -3.862772526 |
| HIP1          | -0.209142289 | 3.351391789 | -2.779723655 | 0.00564687  | -3.865715294 |
| CENPM         | 0.202652852  | 2.382970597 | 2.776997744  | 0.005693703 | -3.873172701 |
| RP11-129M6.1  | 0.217338989  | 0.575867968 | 2.769649067  | 0.005821715 | -3.893241496 |
| DSP           | 0.360343611  | 4.776380637 | 2.766916004  | 0.005869984 | -3.900692175 |
| COX6CP1       | 0.319464614  | 1.391824041 | 2.766802611  | 0.005871994 | -3.901001144 |
| SLC5A8        | -0.270009534 | 0.803888648 | -2.766451928 | 0.005878216 | -3.901956598 |
| BAIAP2L2      | 0.283659779  | 1.488761945 | 2.766064075  | 0.005885104 | -3.903013185 |
| CSAG1         | 0.397682933  | 0.805359045 | 2.761134143  | 0.005973293 | -3.916430762 |
| SYTL5         | 0.213306694  | 0.880040648 | 2.758075061  | 0.006028614 | -3.92474486  |
| MAP1B         | -0.264465166 | 2.049191492 | -2.757158248 | 0.006045284 | -3.927234869 |
| IGFBPL1       | 0.251341659  | 1.386185136 | 2.756063992  | 0.006065235 | -3.930205756 |

|            |              |             |              |             |              |
|------------|--------------|-------------|--------------|-------------|--------------|
| SLC28A2    | 0.249517575  | 0.542944723 | 2.756027725  | 0.006065897 | -3.9303042   |
| PKP1       | 0.413636531  | 1.593973475 | 2.754108055  | 0.006101044 | -3.93551324  |
| CFTR       | -0.262653941 | 1.305099797 | -2.750991976 | 0.006158488 | -3.943961249 |
| NTS        | 0.487817551  | 0.918158166 | 2.750255103  | 0.006172143 | -3.945957631 |
| FAM83E     | 0.275268437  | 3.716361262 | 2.748097601  | 0.006212281 | -3.951799885 |
| RACGAP1    | 0.209671441  | 2.996078619 | 2.747826346  | 0.006217345 | -3.952534098 |
| RAB27B     | -0.279580918 | 2.666545809 | -2.747352085 | 0.006226206 | -3.953817621 |
| WNT4       | 0.217488795  | 1.126851571 | 2.745711492  | 0.006256948 | -3.958256001 |
| RASGEF1A   | 0.205667625  | 1.455526219 | 2.744304009  | 0.00628343  | -3.962061691 |
| AC105009.1 | 0.229879334  | 1.222558595 | 2.743899789  | 0.006291055 | -3.963154309 |
| AOC1       | 0.470399245  | 2.348896541 | 2.743424734  | 0.006300026 | -3.964438199 |
| CDKN2B     | -0.245503841 | 2.568327628 | -2.741705085 | 0.006332597 | -3.969083939 |
| GPR116     | -0.364695608 | 4.596699507 | -2.739359731 | 0.006377264 | -3.975415502 |
| SH3BGRL2   | 0.246446616  | 3.632022417 | 2.736212472  | 0.006437651 | -3.983903645 |
| MT1H       | -0.211981879 | 0.844468979 | -2.733214921 | 0.006495644 | -3.991979224 |
| GATM       | -0.246729316 | 1.766505607 | -2.728889152 | 0.006580166 | -4.003617956 |
| MS4A8      | -0.346609661 | 1.221838746 | -2.72717653  | 0.006613902 | -4.008220922 |
| S100A16    | -0.289010691 | 6.624796421 | -2.72602748  | 0.006636624 | -4.01130762  |
| CALB2      | -0.266881988 | 0.916369751 | -2.723378545 | 0.006689274 | -4.018418657 |
| ENDOD1     | -0.226203233 | 4.001584282 | -2.72027731  | 0.006751392 | -4.02673536  |
| SUSD2      | -0.473599607 | 3.92958629  | -2.714667785 | 0.006865074 | -4.041755277 |
| MIA        | -0.214244452 | 0.373508698 | -2.711924651 | 0.006921292 | -4.049089266 |
| VILL       | -0.263431757 | 1.661151954 | -2.708900575 | 0.006983747 | -4.057166033 |
| MT-TM      | 0.248074176  | 0.97331278  | 2.707782801  | 0.007006961 | -4.060149192 |
| ALDOC      | -0.256557844 | 3.187571367 | -2.705963653 | 0.007044889 | -4.065001653 |
| TOX        | -0.222511036 | 1.889750359 | -2.704698152 | 0.007071382 | -4.068375426 |
| FAM81B     | -0.223345762 | 1.024392451 | -2.701701364 | 0.007134479 | -4.076358631 |
| AC072052.7 | 0.200976678  | 1.402803223 | 2.698816337  | 0.007195702 | -4.084035996 |
| SOX15      | 0.212572744  | 1.108871722 | 2.695222853  | 0.007272619 | -4.093587499 |
| FOS        | -0.330101376 | 6.100449931 | -2.694677143 | 0.007284364 | -4.095036919 |
| DDIT4L     | 0.295442916  | 1.722687092 | 2.694442432  | 0.007289421 | -4.09566023  |
| UGT1A6     | 0.298846589  | 0.659932764 | 2.690117409  | 0.007383172 | -4.10713655  |
| BBOX1-AS1  | 0.239303168  | 0.978490585 | 2.681547028  | 0.007572159 | -4.129824899 |

|              |              |             |              |             |              |
|--------------|--------------|-------------|--------------|-------------|--------------|
| DUSP23       | 0.218363477  | 5.814623688 | 2.68069252   | 0.007591238 | -4.132083183 |
| LGALS3BP     | -0.21133464  | 8.259954888 | -2.677209469 | 0.007669455 | -4.141280907 |
| CHRNA9       | 0.2684212    | 0.538569032 | 2.675361843  | 0.00771124  | -4.146155234 |
| BUB1         | 0.219051968  | 2.132620919 | 2.673446335  | 0.007754775 | -4.151205193 |
| MMP24        | -0.242510769 | 2.135826785 | -2.672270884 | 0.0077816   | -4.154302361 |
| CHMP4BP1     | 0.200601968  | 1.913468032 | 2.660427936  | 0.008056557 | -4.185433202 |
| MAD2L1       | 0.205066176  | 1.958805568 | 2.659134985  | 0.008087097 | -4.188823769 |
| GLCCI1       | -0.204603185 | 2.352980865 | -2.657692761 | 0.008121286 | -4.19260389  |
| CITED2       | -0.238549205 | 5.329937595 | -2.655391367 | 0.008176111 | -4.1986318   |
| UGT2B4       | 0.242743758  | 0.422300356 | 2.654416928  | 0.008199425 | -4.201182565 |
| CKS2         | 0.239990923  | 5.260702672 | 2.652129559  | 0.008254385 | -4.207166574 |
| LDHB         | 0.255118822  | 7.076099262 | 2.650600872  | 0.0082913   | -4.211162992 |
| RP11-108M9.4 | 0.217968043  | 2.79185733  | 2.649726342  | 0.008312485 | -4.213448252 |
| HES1         | 0.213264129  | 4.542448085 | 2.64944649   | 0.008319274 | -4.214179389 |
| SCARA3       | -0.238230328 | 2.287192719 | -2.648277324 | 0.008347693 | -4.217233111 |
| P3H3         | -0.219749451 | 2.521697647 | -2.646124647 | 0.008400246 | -4.222852224 |
| C1orf194     | -0.266770351 | 1.067954611 | -2.645321619 | 0.008419926 | -4.224947223 |
| C9orf152     | 0.300792605  | 2.780314046 | 2.644471558  | 0.008440803 | -4.227164251 |
| MFSD4        | -0.36167958  | 2.643133775 | -2.637025356 | 0.008625679 | -4.24655494  |
| RPS2P46      | 0.219103774  | 2.622824454 | 2.636631411  | 0.00863556  | -4.247579332 |
| AZGP1        | -0.546979291 | 3.164166618 | -2.63550991  | 0.008663746 | -4.250494808 |
| CITED4       | 0.244927709  | 2.350804248 | 2.634605498  | 0.008686536 | -4.252845056 |
| MT-TP        | 0.203784449  | 9.201085313 | 2.62870531   | 0.008836537 | -4.268158318 |
| HOXC10       | 0.349962195  | 1.116063869 | 2.623055381  | 0.008982348 | -4.282790764 |
| TRIP13       | 0.248098637  | 2.537828923 | 2.622516106  | 0.008996377 | -4.284185802 |
| CNFN         | 0.242158655  | 2.066811939 | 2.620758273  | 0.009042244 | -4.288731163 |
| RHOV         | 0.382721583  | 3.20666835  | 2.620721182  | 0.009043214 | -4.28882704  |
| NAPSA        | -0.567995274 | 7.675956083 | -2.616535537 | 0.009153283 | -4.299638098 |
| SLC1A7       | -0.400995099 | 1.47725309  | -2.610746598 | 0.009307491 | -4.314562584 |
| PRSS3P2      | -0.480221373 | 1.619192659 | -2.609592081 | 0.009338522 | -4.317535202 |
| LGR4         | 0.210670093  | 3.381162382 | 2.609336114  | 0.009345415 | -4.318194086 |
| CMAHP        | -0.241022738 | 2.592038415 | -2.602330097 | 0.009535842 | -4.336203827 |
| KCNJ8        | -0.214845738 | 2.388694943 | -2.597996978 | 0.009655348 | -4.347319007 |

|                  |              |             |              |             |              |
|------------------|--------------|-------------|--------------|-------------|--------------|
| NEUROD1          | 0.207917521  | 0.235154206 | 2.597924007  | 0.009657372 | -4.347506034 |
| ATP10B           | -0.220174571 | 0.885007271 | -2.592295529 | 0.009814631 | -4.361916719 |
| RP11-632C17__A.1 | 0.262198445  | 3.074438965 | 2.591143864  | 0.00984709  | -4.364861598 |
| ATP11A           | 0.26387122   | 4.321651677 | 2.591133364  | 0.009847386 | -4.364888439 |
| ANXA2P2          | -0.216081473 | 3.188416583 | -2.590652668 | 0.009860963 | -4.366117227 |
| PHLDA3           | -0.216850507 | 4.308719522 | -2.589945827 | 0.009880957 | -4.367923699 |
| TTR              | 0.215897268  | 0.338870868 | 2.586227102  | 0.009986744 | -4.377419731 |
| SPINK13          | -0.227751829 | 0.703614597 | -2.584381444 | 0.010039623 | -4.382127821 |
| CCNL2            | 0.215478352  | 4.112332062 | 2.580513074  | 0.010151265 | -4.391985032 |
| PLEKHG4B         | 0.211400883  | 0.969313691 | 2.575536687  | 0.010296515 | -4.404644503 |
| RPS4Y1           | 0.693975675  | 2.773691078 | 2.571759332  | 0.010408003 | -4.414237864 |
| LHFPL3-AS2       | -0.280005933 | 1.213504382 | -2.571001675 | 0.010430495 | -4.416160435 |
| MISP             | 0.27858371   | 4.355421286 | 2.570956182  | 0.010431846 | -4.416275857 |
| TMEM125          | 0.241674807  | 5.215393111 | 2.567246437  | 0.010542612 | -4.425681302 |
| CYP4X1           | -0.291062144 | 2.228029339 | -2.567188473 | 0.010544351 | -4.425828154 |
| UBE2C            | 0.347699222  | 4.378032018 | 2.563510089  | 0.010655232 | -4.435140824 |
| MEG3             | -0.249747606 | 1.045311167 | -2.562661449 | 0.010680961 | -4.437287506 |
| LRFN4            | 0.219384694  | 2.56112533  | 2.558094493  | 0.010820372 | -4.44882798  |
| KIF20A           | 0.20511473   | 2.397055134 | 2.556596937  | 0.010866439 | -4.452607865 |
| KIF4A            | 0.23089644   | 2.184699531 | 2.555294713  | 0.010906639 | -4.455892972 |
| WBSCR27          | 0.224188634  | 2.145847627 | 2.553445424  | 0.010963955 | -4.460555355 |
| SEC11C           | 0.259453802  | 4.132422052 | 2.548609399  | 0.011111511 | -4.472732282 |
| TXLNGY           | 0.22352604   | 0.751698675 | 2.547831571  | 0.011139595 | -4.474688724 |
| ASMTL-AS1        | 0.237576682  | 1.698487158 | 2.545265821  | 0.011220701 | -4.481138135 |
| CAPN9            | 0.300682466  | 1.604962847 | 2.545106192  | 0.011225764 | -4.481539179 |
| NPC1L1           | 0.202679422  | 0.490528818 | 2.538605725  | 0.011433693 | -4.497849778 |
| BAI1             | 0.213107484  | 0.713629913 | 2.534582666  | 0.011564089 | -4.507923846 |
| RP11-357D18.1    | -0.204150739 | 0.798460534 | -2.533142426 | 0.011611091 | -4.511526542 |
| C1orf116         | -0.36233939  | 4.816684665 | -2.530853416 | 0.011686143 | -4.51724829  |
| AC007405.6       | 0.215614319  | 2.331324561 | 2.530549155  | 0.011696151 | -4.518008458 |
| CEMIP            | -0.30797981  | 2.679737263 | -2.529129352 | 0.011742955 | -4.521554537 |
| KDM5D            | 0.284494402  | 1.034737321 | 2.52832791   | 0.011769449 | -4.523555348 |
| HIST1H4H         | 0.282762998  | 2.60463214  | 2.527900068  | 0.011783614 | -4.524623208 |

|               |              |             |              |             |              |
|---------------|--------------|-------------|--------------|-------------|--------------|
| RP11-169K16.8 | 0.216050469  | 1.492750938 | 2.527171588  | 0.011807767 | -4.526441035 |
| CNTD2         | 0.233274152  | 1.24168551  | 2.525679629  | 0.011857372 | -4.530162426 |
| SLC16A1       | -0.260084581 | 2.049511567 | -2.525231813 | 0.011872297 | -4.531278995 |
| DUSP6         | -0.26606164  | 5.032709197 | -2.524356523 | 0.011901517 | -4.533460857 |
| AGTR2         | -0.260674559 | 0.895661835 | -2.523784528 | 0.011920647 | -4.534886287 |
| CST1          | -0.480067647 | 2.867219243 | -2.519429338 | 0.012067202 | -4.545729243 |
| MIR6772       | 0.241699986  | 1.721333814 | 2.514825878  | 0.012223851 | -4.55717046  |
| FTLP3         | -0.227855123 | 2.913122028 | -2.511062404 | 0.012353256 | -4.566508862 |
| CLDN8         | 0.266161436  | 0.922553684 | 2.510740699  | 0.012364374 | -4.567306486 |
| MUC13         | 0.52118939   | 2.15349254  | 2.509374879  | 0.012411675 | -4.570691734 |
| RP11-599J14.2 | 0.218734625  | 1.181163099 | 2.50487836   | 0.012568536 | -4.581823878 |
| IGSF9         | 0.215355192  | 2.223160621 | 2.504555405  | 0.012579869 | -4.582622676 |
| MYBL2         | 0.330704241  | 3.770620535 | 2.504121402  | 0.012595115 | -4.583695983 |
| AGPAT2        | 0.205283605  | 5.986583943 | 2.502579927  | 0.012649394 | -4.587506646 |
| MIR429        | 0.258892549  | 1.688648945 | 2.500333668  | 0.012728863 | -4.593055505 |
| UMODL1        | 0.200446743  | 0.628773262 | 2.490803966  | 0.013070959 | -4.616542366 |
| RP11-132A1.4  | 0.217138008  | 1.605002768 | 2.488598525  | 0.013151283 | -4.621965423 |
| EGFR          | -0.269085661 | 3.472097575 | -2.488047915 | 0.013171405 | -4.623318611 |
| FUT2          | 0.219965931  | 2.735488042 | 2.487839518  | 0.013179027 | -4.623830696 |
| IFITM10       | -0.204045343 | 2.044133087 | -2.486020204 | 0.013245742 | -4.62829943  |
| RP11-510N19.5 | 0.244147955  | 1.854952962 | 2.481934354  | 0.013396662 | -4.638323778 |
| RP11-359E19.2 | 0.323997789  | 0.872996456 | 2.478579098  | 0.013521735 | -4.646543637 |
| CMB9-22P13.1  | 0.213009212  | 1.794737708 | 2.477538355  | 0.013560739 | -4.649091092 |
| TGFA          | -0.252364976 | 2.825057314 | -2.47314866  | 0.013726356 | -4.659824385 |
| TC2N          | 0.214295044  | 4.047947347 | 2.46925012   | 0.013874941 | -4.669341177 |
| TPX2          | 0.284637688  | 3.647957366 | 2.468997505  | 0.013884618 | -4.669957334 |
| OBP2A         | 0.201047321  | 0.390085901 | 2.466301694  | 0.013988259 | -4.676528902 |
| PNMAL1        | -0.26614492  | 1.735199248 | -2.465976288 | 0.014000816 | -4.67732167  |
| CLDN10        | 0.373669614  | 1.828668313 | 2.457954361  | 0.014313531 | -4.696832735 |
| CDKL2         | -0.220617569 | 1.652194881 | -2.455701834 | 0.014402445 | -4.702300212 |
| GSTA1         | 0.471532143  | 2.935400112 | 2.452692883  | 0.014521978 | -4.709596097 |
| SFTA1P        | -0.407226    | 3.570521755 | -2.451720859 | 0.01456078  | -4.711951122 |
| IBSP          | -0.211031027 | 0.781810374 | -2.44710942  | 0.014746114 | -4.723111336 |

|               |              |             |              |             |              |
|---------------|--------------|-------------|--------------|-------------|--------------|
| MLPH          | 0.264145809  | 4.430310447 | 2.446639153  | 0.01476513  | -4.724248286 |
| ZNF385B       | -0.264847657 | 1.32605422  | -2.440877325 | 0.014999893 | -4.738161136 |
| ATOH8         | 0.289361169  | 2.032125046 | 2.440125655  | 0.015030762 | -4.739973803 |
| RP11-785D18.3 | 0.339464936  | 0.981510293 | 2.43856934   | 0.015094853 | -4.743725152 |
| TMEM27        | -0.274414976 | 1.698723787 | -2.434570057 | 0.015260656 | -4.753354324 |
| WSB1          | 0.229399548  | 4.773007725 | 2.429908824  | 0.01545593  | -4.764557815 |
| LINC00342     | -0.318352669 | 2.422176301 | -2.42414417  | 0.01570048  | -4.778384434 |
| UPK1B         | 0.330111461  | 0.590380364 | 2.423616766  | 0.015723023 | -4.779647819 |
| PPP1R3C       | -0.202569542 | 2.064572823 | -2.418394109 | 0.015947804 | -4.792144098 |
| GPR35         | 0.211696584  | 1.218918719 | 2.417834703  | 0.015972048 | -4.793481031 |
| RPL3P4        | 0.210370356  | 4.579481405 | 2.415592485  | 0.01606955  | -4.798836711 |
| PTK6          | 0.253606479  | 3.135291347 | 2.414310812  | 0.016125518 | -4.801895886 |
| NCAPH         | 0.205511437  | 2.190257952 | 2.41411493   | 0.016134087 | -4.80236329  |
| RHO           | 0.203053443  | 3.724981382 | 2.408509216  | 0.016381017 | -4.815723655 |
| BHMT2         | 0.350274597  | 1.717316467 | 2.407506465  | 0.016425537 | -4.818110363 |
| NES           | -0.207529688 | 3.079555386 | -2.406985535 | 0.016448707 | -4.819349874 |
| SLC22A17      | -0.201495514 | 2.125506814 | -2.405859369 | 0.016498897 | -4.822028604 |
| GLB1L3        | -0.284953217 | 1.066818213 | -2.393607473 | 0.017053698 | -4.851092146 |
| AKAP12        | -0.264787842 | 2.192646097 | -2.393555864 | 0.017056069 | -4.851214263 |
| OXCT1         | -0.206840711 | 2.671208274 | -2.388613359 | 0.017284515 | -4.862897422 |
| CYP2T1P       | 0.215021335  | 1.553035038 | 2.386174848  | 0.017398213 | -4.86865291  |
| LINC00261     | 0.262963492  | 1.459490689 | 2.385957313  | 0.017408388 | -4.869166069 |
| TRIM29        | -0.312068168 | 1.325898651 | -2.383148537 | 0.017540233 | -4.875787764 |
| KCNK5         | -0.26367995  | 3.814757202 | -2.381855872 | 0.017601205 | -4.878832665 |
| RP11-806O11.1 | 0.246813423  | 1.877760247 | 2.381269747  | 0.017628913 | -4.880212762 |
| GSTM3         | 0.20466569   | 2.427288546 | 2.378816175  | 0.017745316 | -4.885986371 |
| HIST1H1C      | 0.282880572  | 5.918447003 | 2.377762384  | 0.017795518 | -4.888464308 |
| MT-ATP6       | 0.209871803  | 11.66005295 | 2.375961755  | 0.017881587 | -4.892695913 |
| SORCS2        | -0.243298723 | 1.802061534 | -2.372100503 | 0.018067386 | -4.901759563 |
| MT-CYB        | 0.21548228   | 11.32072833 | 2.371201369  | 0.018110895 | -4.903868062 |
| RAB38         | -0.205026182 | 3.170254854 | -2.368737971 | 0.018230568 | -4.90964081  |
| ADRA2A        | -0.270867854 | 1.731857444 | -2.363961935 | 0.018464569 | -4.920816301 |
| DDIT4         | -0.253312791 | 5.569625271 | -2.359371804 | 0.018691943 | -4.931536012 |

|               |              |             |              |             |              |
|---------------|--------------|-------------|--------------|-------------|--------------|
| CDK1          | 0.221034738  | 3.012852384 | 2.359362671  | 0.018692398 | -4.93155732  |
| C1orf233      | -0.228855847 | 2.652459357 | -2.348140323 | 0.019258688 | -4.957679892 |
| MACC1         | -0.221309807 | 2.740617711 | -2.347960342 | 0.019267892 | -4.958097846 |
| AQP4          | -0.386738739 | 2.915764267 | -2.345360186 | 0.01940128  | -4.964132469 |
| STMN1         | 0.208198633  | 4.412409697 | 2.341783395  | 0.019586092 | -4.972423048 |
| EPHA2         | -0.24384536  | 3.900385876 | -2.33705841  | 0.019832594 | -4.983356033 |
| SPRR2C        | -0.224001498 | 0.473071237 | -2.332331549 | 0.020081908 | -4.994271743 |
| NPTX2         | -0.231583069 | 1.069103254 | -2.331907454 | 0.02010441  | -4.995250047 |
| LRRC46        | -0.203394802 | 1.277711235 | -2.331219374 | 0.020140966 | -4.996836941 |
| PLEKHS1       | -0.301337658 | 1.903348596 | -2.327227633 | 0.020354186 | -5.006033908 |
| MBIP          | 0.214955324  | 4.415096735 | 2.322364814  | 0.020616602 | -5.017217004 |
| TFF3          | 0.549609688  | 4.467681632 | 2.322271184  | 0.020621684 | -5.0174321   |
| RP11-497G19.1 | 0.254277617  | 0.679971077 | 2.322148746  | 0.02062833  | -5.017713367 |
| MELK          | 0.22087305   | 2.3258451   | 2.321367938  | 0.020670761 | -5.019506707 |
| XKRX          | -0.25933668  | 1.985689189 | -2.321116486 | 0.020684442 | -5.020084109 |
| TF            | 0.294195852  | 0.842224155 | 2.31918267   | 0.02078992  | -5.024522636 |
| C2orf54       | -0.268484831 | 2.422118651 | -2.3118164   | 0.021196024 | -5.041396663 |
| MT-CO3        | 0.20338319   | 12.30343754 | 2.310224463  | 0.021284693 | -5.045036432 |
| ITIH2         | 0.215894757  | 0.654786064 | 2.308781922  | 0.021365321 | -5.04833251  |
| PTP4A3        | 0.212745198  | 4.625007181 | 2.305547417  | 0.021547076 | -5.055715737 |
| RP11-567G11.1 | 0.256760546  | 1.635820595 | 2.305395056  | 0.021555671 | -5.056063272 |
| DDX3Y         | 0.322805536  | 1.378941421 | 2.301032069  | 0.021803064 | -5.066005728 |
| CXCL2         | -0.289529428 | 4.027162199 | -2.297023045 | 0.022032567 | -5.075125316 |
| RASSF10       | 0.201297158  | 1.455920528 | 2.291810882  | 0.022334096 | -5.086958484 |
| RRM2          | 0.234713679  | 3.231348526 | 2.290939513  | 0.022384855 | -5.088934182 |
| FAM83D        | 0.206214603  | 2.563150775 | 2.285945015  | 0.02267774  | -5.100244276 |
| ABO           | 0.236286809  | 2.445462836 | 2.280077885  | 0.02302606  | -5.11349958  |
| RP11-497G19.2 | 0.250429784  | 0.661729369 | 2.277696999  | 0.023168732 | -5.118869079 |
| RP11-750B16.1 | 0.33659182   | 1.788455357 | 2.277568092  | 0.023176479 | -5.119159639 |
| ANKRD65       | 0.267804701  | 3.339729136 | 2.276069195  | 0.023266719 | -5.122537027 |
| TOP2A         | 0.253729536  | 3.933863051 | 2.271937611  | 0.023517046 | -5.131835234 |
| PLOD2         | -0.256227782 | 3.587002984 | -2.260412828 | 0.024227745 | -5.157684518 |
| PVRL4         | 0.203594457  | 4.173299221 | 2.252889743  | 0.024701681 | -5.174488806 |



|               |              |             |              |             |              |
|---------------|--------------|-------------|--------------|-------------|--------------|
| AADAC         | -0.251163736 | 1.09433067  | -2.24506934  | 0.025202866 | -5.191899028 |
| HK2           | -0.209040594 | 3.590765694 | -2.241105089 | 0.025460278 | -5.200701809 |
| GJB3          | -0.302918461 | 1.78566962  | -2.233626408 | 0.02595211  | -5.217267016 |
| RSPH1         | -0.214832013 | 1.464567248 | -2.229007934 | 0.02625994  | -5.227469787 |
| SLPI          | -0.412347352 | 8.052018699 | -2.227343432 | 0.026371656 | -5.231141799 |
| C5            | 0.26874627   | 2.12275263  | 2.2258468    | 0.026472456 | -5.234441183 |
| HIST1H2BD     | 0.219072028  | 4.338595426 | 2.22391401   | 0.026603125 | -5.238698877 |
| ENPP3         | -0.247377534 | 1.329016397 | -2.221958587 | 0.026735894 | -5.243002741 |
| AC016739.2    | 0.203197648  | 3.058824695 | 2.221013963  | 0.026800236 | -5.245080518 |
| BPIFA1        | 0.705477755  | 4.144556001 | 2.22071639   | 0.026820533 | -5.245734874 |
| CEACAM6       | -0.418455381 | 8.296539745 | -2.21860922  | 0.026964641 | -5.250366035 |
| EEF1A1P5      | -0.252588354 | 4.202593928 | -2.206103836 | 0.027833743 | -5.277761805 |
| KLK14         | 0.312202634  | 0.879999742 | 2.201150558  | 0.028184626 | -5.288571058 |
| IGFBP3        | -0.272391722 | 5.732983369 | -2.200877376 | 0.028204089 | -5.289166514 |
| IRX2          | -0.334271194 | 2.563682115 | -2.199790819 | 0.028281615 | -5.291534169 |
| SLC6A8        | 0.218697162  | 2.803149666 | 2.196344748  | 0.028528711 | -5.299035726 |
| MDK           | 0.250957712  | 6.81103843  | 2.194470884  | 0.028663856 | -5.303109993 |
| LRRC31        | -0.232223206 | 1.142716384 | -2.187036296 | 0.029205508 | -5.319241108 |
| BRDT          | 0.219838927  | 0.694449363 | 2.179494055  | 0.029764007 | -5.335550929 |
| KCNE4         | 0.251371552  | 1.950761827 | 2.177532117  | 0.029910788 | -5.33978449  |
| PSAT1         | 0.247709688  | 3.357731055 | 2.1765601    | 0.02998374  | -5.341880567 |
| NMU           | 0.281048443  | 1.944761205 | 2.176292972  | 0.030003816 | -5.342456447 |
| RP11-156K13.3 | 0.201844702  | 0.661348447 | 2.174270821  | 0.030156162 | -5.34681359  |
| ALOX15        | -0.22833834  | 0.963526214 | -2.172589336 | 0.03028335  | -5.350433669 |
| KRT23         | -0.244286468 | 0.787114494 | -2.163668955 | 0.030965849 | -5.369592459 |
| RSPO3         | -0.227290721 | 1.105320148 | -2.158869416 | 0.031338513 | -5.379868685 |
| RP5-857K21.6  | 0.267735187  | 5.5435284   | 2.156717494  | 0.031506849 | -5.384468863 |
| ALDH1A1       | -0.309470329 | 4.523612455 | -2.154940808 | 0.031646418 | -5.388263504 |
| EPHX3         | 0.230970426  | 2.993632266 | 2.1512184    | 0.03194056  | -5.396203861 |
| HNRNPA1P27    | -0.226348592 | 1.461248332 | -2.150812412 | 0.031972783 | -5.397069069 |
| MT-TL1        | 0.237239255  | 2.145615161 | 2.147936777  | 0.032201818 | -5.403192794 |
| MIR647        | 0.202954011  | 2.636921525 | 2.135507649  | 0.03320805  | -5.429568377 |
| RP11-470M17.2 | 0.266615742  | 1.087282312 | 2.131178841  | 0.033564781 | -5.438719164 |

|               |              |             |              |             |              |
|---------------|--------------|-------------|--------------|-------------|--------------|
| FAM183A       | -0.237890566 | 1.63922378  | -2.124870118 | 0.034090558 | -5.452022702 |
| VIL1          | 0.304036923  | 1.223893988 | 2.122602782  | 0.034281238 | -5.456794493 |
| GKN2          | 0.330409626  | 1.457308479 | 2.11973513   | 0.034523712 | -5.462822532 |
| ATF3          | -0.21922075  | 3.397544574 | -2.109316114 | 0.0354171   | -5.48465679  |
| GPC4          | -0.215638614 | 4.370403377 | -2.104261394 | 0.035857603 | -5.495211475 |
| C8orf4        | 0.292899218  | 6.781452413 | 2.103495804  | 0.035924728 | -5.496807923 |
| OAS1          | -0.205133929 | 3.993428599 | -2.102623066 | 0.03600138  | -5.498627106 |
| CTD-3252C9.4  | -0.205599874 | 3.137847947 | -2.102220914 | 0.036036747 | -5.499465122 |
| NUPR1L        | 0.23465422   | 1.029331225 | 2.101146074  | 0.03613142  | -5.501704139 |
| SERPINF2      | 0.222526796  | 2.803533709 | 2.096283308  | 0.036562401 | -5.511819779 |
| HPGD          | -0.33632965  | 3.409476221 | -2.094393701 | 0.036731055 | -5.515744373 |
| BPIFB1        | -0.478737852 | 3.668325474 | -2.089983071 | 0.037127309 | -5.524891438 |
| S100A6        | -0.221012964 | 10.26809962 | -2.086159553 | 0.037473765 | -5.532805579 |
| LINC00460     | -0.214241747 | 0.926494596 | -2.080430285 | 0.037998068 | -5.544637699 |
| RP5-857K21.11 | 0.294538252  | 2.298011347 | 2.076960633  | 0.038318619 | -5.551787699 |
| NR4A2         | 0.230116007  | 2.744528221 | 2.076157483  | 0.038393148 | -5.5534411   |
| BAALC         | 0.225915791  | 1.130264623 | 2.076034207  | 0.038404598 | -5.553694825 |
| MUC20         | 0.250590509  | 3.24677043  | 2.068257114  | 0.039132874 | -5.56967165  |
| MTND1P23      | 0.374321265  | 1.820646819 | 2.066608697  | 0.03928874  | -5.573050496 |
| SCG2          | 0.232886191  | 1.039585184 | 2.066347997  | 0.039313439 | -5.573584624 |
| MAOA          | 0.239790932  | 4.193080384 | 2.052565038  | 0.040638204 | -5.601729121 |
| C4BPA         | -0.413902632 | 5.206922308 | -2.049255885 | 0.040961858 | -5.60845877  |
| KCNK1         | 0.204668891  | 3.367683898 | 2.047804865  | 0.041104465 | -5.611406266 |
| TNS4          | -0.308697007 | 1.968784132 | -2.044495275 | 0.041431314 | -5.618121445 |
| GOLT1A        | 0.221226584  | 3.543160834 | 2.039202502  | 0.041958606 | -5.628838317 |
| GDF15         | 0.294137893  | 4.708279192 | 2.036307453  | 0.042249427 | -5.634688689 |
| CYP24A1       | 0.383978643  | 2.944675973 | 2.033758096  | 0.042506937 | -5.639833714 |
| TREM1         | -0.262132384 | 3.307279565 | -2.028523676 | 0.043039838 | -5.65037777  |
| CACNG4        | -0.27523664  | 1.852887315 | -2.02077935  | 0.043838649 | -5.66592868  |
| FOXA2         | 0.279653108  | 3.009381692 | 2.016398248  | 0.044296086 | -5.674700192 |
| F5            | -0.214804404 | 1.273986799 | -2.016056227 | 0.044331966 | -5.675384173 |
| ALPK3         | 0.207008789  | 2.17753467  | 2.004150105  | 0.04559642  | -5.699123127 |
| SST           | 0.32615919   | 0.644798877 | 2.00172633   | 0.04585753  | -5.703938811 |

|              |              |             |              |             |              |
|--------------|--------------|-------------|--------------|-------------|--------------|
| NFE4         | -0.203813156 | 0.577390932 | -1.999684047 | 0.046078522 | -5.707992073 |
| PEBP4        | -0.341890245 | 2.760893514 | -1.997995846 | 0.046261878 | -5.711339525 |
| KRT6A        | -0.419127267 | 2.001009288 | -1.995610975 | 0.04652195  | -5.716063629 |
| CDH17        | 0.261831233  | 0.959935347 | 1.995430351  | 0.046541697 | -5.716421194 |
| ITGB4        | -0.256418291 | 4.654369032 | -1.986212807 | 0.047558873 | -5.734626062 |
| BMP6         | 0.243510869  | 1.732194354 | 1.984432101  | 0.047757523 | -5.738133438 |
| LY6D         | -0.304085323 | 1.403478395 | -1.979764079 | 0.048281596 | -5.747313132 |
| MS4A15       | -0.323220684 | 1.770668483 | -1.977475071 | 0.048540345 | -5.751806702 |
| PAX7         | 0.216753545  | 0.573088702 | 1.976505385  | 0.04865031  | -5.753708759 |
| EPS8L3       | 0.223542559  | 0.602288436 | 1.972617346  | 0.049093334 | -5.761325994 |
| SEZ6L2       | -0.233840289 | 4.278856233 | -1.96998663  | 0.049395013 | -5.766471574 |
| RP11-469H8.6 | 0.202181036  | 1.031170796 | 1.967399415  | 0.049693225 | -5.771525474 |

---

**Table S2. The Kaplan-Meier analysis and univariate Cox regression recognized potential prognostic genes (p-value < 0.05).**

| <b>ID</b> | <b>KM_pvalue</b> | <b>HR</b>   | <b>HR_95L</b> | <b>HR_95H</b> | <b>Cox_pvalue</b> |
|-----------|------------------|-------------|---------------|---------------|-------------------|
| GJB3      | 4.91E-05         | 1.286595672 | 1.172188403   | 1.412169256   | 1.14E-07          |
| KRT6A     | 0.00429395       | 1.155784859 | 1.094348355   | 1.220670397   | 2.05E-07          |
| ARNTL2    | 0.001496175      | 1.368158001 | 1.201317673   | 1.558169297   | 2.31E-06          |
| GNG7      | 1.09E-05         | 0.575059938 | 0.455897653   | 0.725368798   | 3.01E-06          |
| VEGFC     | 0.011221481      | 1.373019086 | 1.201386191   | 1.569171866   | 3.27E-06          |
| CERS4     | 0.000678228      | 0.708313369 | 0.612468808   | 0.819156537   | 3.33E-06          |
| PLK1      | 8.54E-05         | 1.404974984 | 1.215060666   | 1.624572961   | 4.46E-06          |
| FKBP4     | 0.000656198      | 1.512177196 | 1.263554203   | 1.809720443   | 6.41E-06          |
| ECT2      | 0.002446829      | 1.415865748 | 1.214438723   | 1.650701495   | 8.94E-06          |
| EXO1      | 0.003641936      | 1.419279618 | 1.213129347   | 1.660461549   | 1.23E-05          |
| CMAHP     | 0.000300256      | 0.709203538 | 0.607583927   | 0.82781923    | 1.33E-05          |
| ABCC2     | 0.01641664       | 1.190954913 | 1.100806709   | 1.288485611   | 1.35E-05          |
| RRM2      | 0.000569177      | 1.322748251 | 1.164307198   | 1.502750252   | 1.73E-05          |
| PRC1      | 6.63E-05         | 1.383039781 | 1.188043079   | 1.610041814   | 2.89E-05          |
| FSCN1     | 0.002628796      | 1.272965405 | 1.136732038   | 1.425525866   | 2.93E-05          |
| HMGA1     | 0.000804859      | 1.31631808  | 1.154320989   | 1.501049799   | 4.10E-05          |
| KIF14     | 3.57E-05         | 1.483223959 | 1.227639286   | 1.792019316   | 4.40E-05          |
| HJURP     | 0.000696022      | 1.328728707 | 1.158829645   | 1.523537118   | 4.67E-05          |
| CCR2      | 0.000290542      | 0.65747613  | 0.536857988   | 0.805194059   | 5.01E-05          |
| TPX2      | 0.002890157      | 1.25449589  | 1.123257827   | 1.401067413   | 5.78E-05          |
| FOXM1     | 0.001110135      | 1.284586442 | 1.136168491   | 1.452392264   | 6.39E-05          |
| OIP5      | 0.00029949       | 1.391319232 | 1.177332901   | 1.644198684   | 0.000106219       |
| KIF4A     | 0.004864936      | 1.318787916 | 1.146095595   | 1.517501311   | 0.000111456       |
| UCK2      | 0.000577045      | 1.348553105 | 1.158686123   | 1.569532456   | 0.000112307       |
| SLC16A3   | 0.000238722      | 1.361666929 | 1.163643214   | 1.593389453   | 0.000118064       |
| PCDH7     | 0.004697663      | 1.295245062 | 1.13477863    | 1.478402682   | 0.000126275       |
| FAAH      | 0.002680337      | 0.68516452  | 0.564724029   | 0.831291738   | 0.00012645        |
| LAMC2     | 0.003018706      | 1.208478654 | 1.096782472   | 1.33154996    | 0.000129739       |
| CTSH      | 0.014136377      | 0.797222352 | 0.709852616   | 0.895345688   | 0.000129958       |

|          |             |             |             |             |             |
|----------|-------------|-------------|-------------|-------------|-------------|
| NEK2     | 0.000473885 | 1.300506898 | 1.1367318   | 1.487877959 | 0.000130159 |
| SPC25    | 0.001912394 | 1.393815562 | 1.173296875 | 1.655780272 | 0.000157647 |
| CHEK1    | 0.009400996 | 1.423292762 | 1.183868351 | 1.711138139 | 0.000172602 |
| DPYSL2   | 0.009173965 | 0.742423181 | 0.635405919 | 0.86746466  | 0.000176654 |
| FCGRT    | 0.001430341 | 0.688742608 | 0.56535989  | 0.839052059 | 0.000213682 |
| DENND1C  | 0.000574151 | 0.614974746 | 0.474843797 | 0.796459679 | 0.000228842 |
| BTG2     | 0.002973992 | 0.790595595 | 0.696935382 | 0.896842678 | 0.000259922 |
| CD40LG   | 0.004450403 | 0.603035786 | 0.459661858 | 0.791129724 | 0.000260791 |
| SLC34A2  | 0.007399669 | 0.881398002 | 0.823566105 | 0.94329093  | 0.000266352 |
| FUCA1    | 0.018101883 | 0.697457644 | 0.574214114 | 0.847152923 | 0.000281248 |
| MTL5     | 0.000132248 | 1.413577904 | 1.172183018 | 1.70468473  | 0.000291438 |
| KIF11    | 0.001155491 | 1.324318256 | 1.13730774  | 1.542079404 | 0.000298648 |
| TGIF1    | 4.80E-05    | 1.592238359 | 1.237244662 | 2.049087841 | 0.000301447 |
| LRFN4    | 0.003396672 | 1.332934729 | 1.139913358 | 1.558640382 | 0.000317361 |
| CDK1     | 3.48E-05    | 1.273785278 | 1.116573093 | 1.453132756 | 0.00031753  |
| RPS6KA1  | 0.004880836 | 0.590566723 | 0.443361394 | 0.786647325 | 0.000317583 |
| TPI1     | 0.015972759 | 1.536454559 | 1.214783084 | 1.943303824 | 0.000339279 |
| CCNB2    | 0.002231108 | 1.284570323 | 1.119763106 | 1.473633938 | 0.00035072  |
| NEIL3    | 0.000554053 | 1.297642464 | 1.124423134 | 1.497546532 | 0.000365046 |
| PAICS    | 0.012166354 | 1.461870099 | 1.186330761 | 1.801406703 | 0.000366017 |
| KIF23    | 0.000396967 | 1.331130474 | 1.13718014  | 1.558159763 | 0.000370964 |
| NPC2     | 0.000685934 | 0.801342934 | 0.709049175 | 0.905650159 | 0.000389156 |
| MBIP     | 0.008232649 | 0.774035589 | 0.671596865 | 0.8920993   | 0.000405683 |
| NCAPG    | 0.006722682 | 1.300531936 | 1.124044937 | 1.504729268 | 0.000413278 |
| PBK      | 0.00264619  | 1.257299261 | 1.106847348 | 1.428201852 | 0.00042976  |
| IL16     | 0.000807067 | 0.656299107 | 0.518522636 | 0.830684116 | 0.000460091 |
| GPR116   | 0.003731309 | 0.841316618 | 0.763093469 | 0.927558262 | 0.000519904 |
| RAD51    | 0.018434057 | 1.400749598 | 1.157339712 | 1.695353071 | 0.000539485 |
| FANCI    | 0.005103834 | 1.383204154 | 1.150918743 | 1.662370819 | 0.000543197 |
| ALDOA    | 0.00197006  | 1.446680773 | 1.172732992 | 1.784622138 | 0.000565712 |
| MS4A1    | 0.000646014 | 0.79028853  | 0.691254095 | 0.903511408 | 0.000570454 |
| KIAA0101 | 0.000806402 | 1.304912968 | 1.121265709 | 1.518639016 | 0.00058392  |

|          |             |             |             |             |             |
|----------|-------------|-------------|-------------|-------------|-------------|
| BUB1B    | 0.000607945 | 1.301070344 | 1.119384097 | 1.512245926 | 0.00060453  |
| CHRD1    | 0.000134592 | 0.806123407 | 0.712575441 | 0.911952491 | 0.000616066 |
| UNC13B   | 0.000216597 | 0.771897618 | 0.665524772 | 0.895272359 | 0.000620998 |
| STRAP    | 0.009623053 | 1.481561896 | 1.182124991 | 1.856847346 | 0.000644008 |
| CBFA2T3  | 0.009016829 | 0.613714545 | 0.46329009  | 0.812979926 | 0.000665978 |
| BTK      | 0.000297861 | 0.722614395 | 0.599281982 | 0.871328656 | 0.00066777  |
| B4GALT4  | 0.010819408 | 1.452028985 | 1.171202148 | 1.800191519 | 0.000671274 |
| CD1D     | 0.000958449 | 0.637923665 | 0.491145459 | 0.828566355 | 0.000752791 |
| RNASE1   | 0.001974356 | 0.850188854 | 0.773462434 | 0.93452643  | 0.000770455 |
| CKS1B    | 0.002766141 | 1.307176886 | 1.118166873 | 1.52813632  | 0.000774864 |
| CENPF    | 0.004575644 | 1.263007639 | 1.101983238 | 1.447561307 | 0.000792097 |
| VDAC2    | 0.007902772 | 1.592458648 | 1.213269074 | 2.090158398 | 0.000798918 |
| BIRC5    | 0.000512744 | 1.225187869 | 1.087336185 | 1.380516288 | 0.000853495 |
| SFTPD    | 0.006936968 | 0.903031336 | 0.850333872 | 0.958994602 | 0.000884913 |
| MAD2L1   | 0.000517454 | 1.305173287 | 1.115466397 | 1.527143547 | 0.000888771 |
| SLAMF1   | 0.000487719 | 0.629991215 | 0.479697178 | 0.827373914 | 0.00089156  |
| CDC20    | 0.038200527 | 1.211368754 | 1.081783089 | 1.356477349 | 0.00089451  |
| CAMK1D   | 0.025627835 | 0.785676028 | 0.681362642 | 0.905959299 | 0.00090401  |
| CBX7     | 0.008603131 | 0.678481609 | 0.539228569 | 0.853696039 | 0.000934413 |
| MS4A2    | 0.022220796 | 0.658943112 | 0.51442748  | 0.844056824 | 0.000959723 |
| NUSAP1   | 0.000263608 | 1.273267628 | 1.103049945 | 1.469752535 | 0.000968624 |
| NLRP1    | 0.012702655 | 0.696946124 | 0.562001947 | 0.8642922   | 0.001008142 |
| CDT1     | 0.035667821 | 1.283511767 | 1.104826966 | 1.491095445 | 0.001101184 |
| CENPM    | 0.005548155 | 1.313851391 | 1.114825436 | 1.548408764 | 0.001126297 |
| GDF10    | 0.005455362 | 0.707451543 | 0.574417114 | 0.871296613 | 0.001129017 |
| TRAF3IP3 | 0.001737377 | 0.644054759 | 0.493829543 | 0.839979175 | 0.001167106 |
| MCM4     | 0.007709112 | 1.283214988 | 1.103847104 | 1.491728972 | 0.001170049 |
| MELK     | 0.005327625 | 1.240160619 | 1.088455639 | 1.413009687 | 0.001224346 |
| CCDC28A  | 0.01171666  | 0.64258189  | 0.491460809 | 0.840171746 | 0.001224826 |
| SKA1     | 0.037868553 | 1.310862579 | 1.112472032 | 1.544632722 | 0.001225086 |
| HTATIP2  | 0.021106499 | 1.408803894 | 1.144263827 | 1.734502451 | 0.001238191 |
| CDC6     | 0.001765597 | 1.265332592 | 1.096653265 | 1.459956962 | 0.001264623 |

|         |             |             |             |             |             |
|---------|-------------|-------------|-------------|-------------|-------------|
| MGP     | 0.002194157 | 0.830807679 | 0.7420004   | 0.930243971 | 0.001310817 |
| ADRB2   | 0.006821284 | 0.696115979 | 0.557993829 | 0.868427986 | 0.00132683  |
| RNF130  | 0.016814914 | 0.620321529 | 0.463190729 | 0.830756697 | 0.001354817 |
| ICAM3   | 0.002295168 | 0.655897123 | 0.506335788 | 0.849635846 | 0.001403203 |
| TFEB    | 0.009860164 | 0.664306628 | 0.516552394 | 0.854324365 | 0.001439479 |
| PTGDS   | 0.016458927 | 0.844159954 | 0.760570386 | 0.936936332 | 0.00145074  |
| MAP3K3  | 0.031267071 | 0.652159901 | 0.50070813  | 0.849422072 | 0.001522556 |
| HLF     | 0.00133174  | 0.791660362 | 0.685024281 | 0.914896225 | 0.00155135  |
| CYCS    | 0.000678607 | 1.410693187 | 1.139902451 | 1.745811904 | 0.001555754 |
| PLOD2   | 0.037826572 | 1.200844484 | 1.070346461 | 1.347252994 | 0.001819781 |
| RASGRP2 | 0.004290593 | 0.655902627 | 0.501605446 | 0.85766265  | 0.002055809 |
| KLRB1   | 0.016591323 | 0.754918691 | 0.631276391 | 0.902777671 | 0.002065098 |
| RACGAP1 | 0.005580173 | 1.2839374   | 1.09504127  | 1.505418371 | 0.002082826 |
| ZWINT   | 0.010076308 | 1.248155849 | 1.083554449 | 1.437761641 | 0.002125476 |
| CDCA3   | 0.000383509 | 1.319608841 | 1.105576582 | 1.575076319 | 0.0021295   |
| DDIT4   | 0.008468696 | 1.213711587 | 1.07204438  | 1.374099657 | 0.002224228 |
| SMAD9   | 0.002726069 | 0.684471749 | 0.536410755 | 0.873400786 | 0.002300667 |
| UBE2C   | 0.036479194 | 1.160711037 | 1.05461661  | 1.277478562 | 0.002309194 |
| ARHGEF6 | 0.00245767  | 0.734230157 | 0.601403281 | 0.896393386 | 0.002411675 |
| FAM64A  | 0.003535517 | 1.26617469  | 1.086269015 | 1.475875979 | 0.002542333 |
| TTLL12  | 0.013201781 | 1.375299408 | 1.117939474 | 1.691905963 | 0.002572896 |
| CD1E    | 0.006654779 | 0.77776713  | 0.66018187  | 0.916295548 | 0.002653727 |
| ORC1    | 0.009018638 | 1.307014356 | 1.09724771  | 1.5568832   | 0.00270233  |
| HMHA1   | 0.000694399 | 0.733156122 | 0.597729124 | 0.899266704 | 0.002892284 |
| DRAM1   | 0.001556136 | 0.818104642 | 0.716463613 | 0.934164965 | 0.003015942 |
| ABCA8   | 0.00579955  | 0.654925263 | 0.494989523 | 0.866537736 | 0.003049058 |
| KIFC1   | 0.019722175 | 1.216917773 | 1.068563591 | 1.38586873  | 0.00307908  |
| FCHSD2  | 0.017554359 | 0.626772888 | 0.459723916 | 0.854522115 | 0.003136116 |
| CENPA   | 0.020733675 | 1.227965784 | 1.070859705 | 1.408120934 | 0.003280693 |
| ATIC    | 0.04499318  | 1.560894876 | 1.159870722 | 2.100572734 | 0.003294379 |
| SYNE1   | 0.045716589 | 0.717043718 | 0.574109582 | 0.895563686 | 0.003363569 |
| SASH3   | 0.003178058 | 0.803210553 | 0.692838209 | 0.931165725 | 0.003665778 |

|          |             |             |             |             |             |
|----------|-------------|-------------|-------------|-------------|-------------|
| NDRG2    | 0.010944236 | 0.767929429 | 0.642204634 | 0.918267445 | 0.003795399 |
| DTYMK    | 0.00100326  | 1.361395764 | 1.104525531 | 1.678004152 | 0.003829857 |
| ACAP1    | 0.006225947 | 0.733745668 | 0.594380183 | 0.905788452 | 0.003968495 |
| SFTPC    | 0.027058298 | 0.941646911 | 0.903875969 | 0.980996216 | 0.003995106 |
| MFAP4    | 0.011584424 | 0.865995943 | 0.784999594 | 0.955349506 | 0.004083028 |
| TLE2     | 0.00145303  | 0.787367271 | 0.668779984 | 0.926982316 | 0.004100582 |
| CD22     | 0.008611604 | 0.747988818 | 0.612582124 | 0.913326149 | 0.004375362 |
| CDC45    | 0.009352153 | 1.225039592 | 1.06487204  | 1.409297968 | 0.004523127 |
| RND3     | 0.031056314 | 1.2203881   | 1.063527699 | 1.400383944 | 0.004548109 |
| PRKCB    | 0.000859776 | 0.713159816 | 0.5642391   | 0.901385463 | 0.004673366 |
| MRPL15   | 0.010193791 | 1.322321925 | 1.089414211 | 1.605023374 | 0.004708933 |
| MCM10    | 0.01959606  | 1.278414254 | 1.077065821 | 1.517403091 | 0.004969475 |
| ARHGAP25 | 0.002241871 | 0.722668555 | 0.575922361 | 0.906805979 | 0.005036302 |
| PIK3IP1  | 0.007705053 | 0.755408741 | 0.620750152 | 0.919278657 | 0.005107216 |
| TTK      | 0.000391439 | 1.254481101 | 1.070391202 | 1.470231472 | 0.005108957 |
| ESPL1    | 0.000353859 | 1.279716478 | 1.076166847 | 1.521766137 | 0.005263057 |
| POLD2    | 0.003499067 | 1.416466661 | 1.108337866 | 1.810258281 | 0.005405488 |
| PHACTR1  | 0.008377535 | 0.697098967 | 0.540584221 | 0.898929252 | 0.005414876 |
| CORO1A   | 0.014010648 | 0.80447836  | 0.690094065 | 0.937822053 | 0.005429974 |
| GPR87    | 0.033693036 | 1.123176567 | 1.034826077 | 1.219070168 | 0.005453762 |
| MYBL2    | 0.018666811 | 1.142482881 | 1.039451662 | 1.25572663  | 0.005738024 |
| CD74     | 0.001898211 | 0.862733636 | 0.776662786 | 0.958342979 | 0.005897007 |
| RFTN1    | 0.003769824 | 0.804969971 | 0.689369592 | 0.939955377 | 0.006091113 |
| TOP2A    | 0.036115354 | 1.168331155 | 1.045268179 | 1.305882753 | 0.006151619 |
| RASSF2   | 0.001849044 | 0.788485363 | 0.664620078 | 0.93543543  | 0.006422079 |
| RORA     | 0.011606109 | 0.620457045 | 0.43999247  | 0.874939849 | 0.006492207 |
| CR2      | 0.035123918 | 0.823195681 | 0.714769129 | 0.948069946 | 0.006933875 |
| ZNF671   | 0.009481218 | 0.684985843 | 0.520255825 | 0.901874776 | 0.007021035 |
| CYLD     | 0.01487111  | 0.666656154 | 0.49643933  | 0.895236135 | 0.007024076 |
| GSTM5    | 0.038373843 | 0.547116354 | 0.350408888 | 0.854248609 | 0.007979612 |
| CEACAM21 | 0.006989718 | 0.725195612 | 0.571789379 | 0.919759435 | 0.008055579 |
| IL33     | 0.03771703  | 0.840990499 | 0.739801353 | 0.956020175 | 0.008106942 |



|          |              |             |             |             |             |
|----------|--------------|-------------|-------------|-------------|-------------|
| BANK1    | 0.021815051  | 0.744175472 | 0.597738873 | 0.92648673  | 0.008219128 |
| MAP4K1   | 0.008817633  | 0.777056314 | 0.643487362 | 0.938350232 | 0.008762023 |
| PPM1G    | 0.0011115905 | 1.50853687  | 1.109054012 | 2.05191403  | 0.008807902 |
| PIK3CD   | 0.000226691  | 0.768414865 | 0.630254624 | 0.936861679 | 0.009190376 |
| HSD17B6  | 0.001290348  | 0.864959715 | 0.775368309 | 0.964903131 | 0.009312407 |
| CD2      | 0.005080979  | 0.836896621 | 0.730983758 | 0.958155289 | 0.009904834 |
| GPR18    | 0.037110876  | 0.630993691 | 0.444531878 | 0.895668136 | 0.009980401 |
| FXYP1    | 0.042849616  | 0.504099876 | 0.299234491 | 0.849222576 | 0.010048788 |
| CD37     | 0.005834908  | 0.822509537 | 0.708779689 | 0.954488325 | 0.010069267 |
| S100P    | 0.038375595  | 1.069965238 | 1.016166739 | 1.12661197  | 0.010191582 |
| CD28     | 0.012535004  | 0.695249235 | 0.526337095 | 0.918368671 | 0.010478446 |
| ANXA2P2  | 0.00653376   | 1.219723814 | 1.047172123 | 1.420708353 | 0.010703135 |
| TXNDC15  | 0.005957687  | 0.683361799 | 0.508886188 | 0.917657739 | 0.011365009 |
| NMB      | 0.025933109  | 1.190930438 | 1.0399165   | 1.363874223 | 0.011546041 |
| TBRG4    | 0.008213706  | 1.399149612 | 1.077564644 | 1.816707374 | 0.011715504 |
| CD48     | 0.022706016  | 0.835903142 | 0.727110721 | 0.960973401 | 0.01175097  |
| CCR7     | 0.037353112  | 0.815682235 | 0.69600317  | 0.955940341 | 0.011850655 |
| SLC3A2   | 0.029349342  | 1.344914499 | 1.067044187 | 1.695145365 | 0.01208975  |
| KIF18B   | 0.000712551  | 1.197819213 | 1.039986835 | 1.379604837 | 0.012285439 |
| ADRBK2   | 0.013189868  | 0.763333995 | 0.616600617 | 0.944985735 | 0.013157032 |
| FHL1     | 0.028304554  | 0.836997518 | 0.727103824 | 0.963500427 | 0.013222234 |
| STEAP1   | 4.88E-05     | 1.140063667 | 1.027349666 | 1.265143901 | 0.013588133 |
| SELP     | 0.006373339  | 0.791596917 | 0.657289781 | 0.953347667 | 0.013755197 |
| PSTPIP1  | 0.001047455  | 0.745607296 | 0.589258229 | 0.943440775 | 0.014490901 |
| LYL1     | 0.0417565    | 0.71135494  | 0.540895565 | 0.935533369 | 0.014820564 |
| SLC6A8   | 0.024162805  | 1.173805677 | 1.031842508 | 1.335300451 | 0.014827249 |
| CYFIP2   | 0.019350481  | 0.808511809 | 0.681252394 | 0.959543556 | 0.014991586 |
| TDG      | 0.039754396  | 1.356670401 | 1.060062357 | 1.736270103 | 0.015378056 |
| LTB      | 0.015423105  | 0.863861593 | 0.766179603 | 0.973997283 | 0.016834565 |
| PIK3R1   | 0.001224051  | 0.740850366 | 0.578366037 | 0.948982528 | 0.017573195 |
| PPP1R16B | 0.016315428  | 0.797299169 | 0.661318333 | 0.9612405   | 0.017582256 |
| PIGR     | 0.033746966  | 0.936841376 | 0.887638642 | 0.988771469 | 0.017778395 |

|          |             |             |             |             |             |
|----------|-------------|-------------|-------------|-------------|-------------|
| E2F8     | 0.020649681 | 1.263560925 | 1.039861756 | 1.535383144 | 0.018615154 |
| HIP1     | 0.032059997 | 0.813950046 | 0.685567963 | 0.966373451 | 0.018746922 |
| MYO1F    | 0.016429967 | 0.787456742 | 0.645201516 | 0.961076664 | 0.018748186 |
| TRIP13   | 0.003552683 | 1.175426574 | 1.026963555 | 1.345352154 | 0.018967331 |
| IL24     | 0.037623566 | 0.732022308 | 0.56375759  | 0.950508993 | 0.019239729 |
| A2M      | 0.03635591  | 0.865952386 | 0.767586037 | 0.976924407 | 0.019312523 |
| IL7R     | 0.012523275 | 0.855911177 | 0.751178096 | 0.975246677 | 0.019473474 |
| IL6ST    | 0.004395105 | 0.792793347 | 0.652347799 | 0.96347576  | 0.019597084 |
| CCT2     | 0.014569142 | 1.180702395 | 1.026677411 | 1.357834632 | 0.019852626 |
| GPSM3    | 0.006949632 | 0.823132687 | 0.698572051 | 0.96990342  | 0.020072179 |
| IFT57    | 0.019130454 | 0.849668442 | 0.740289112 | 0.975208806 | 0.020503416 |
| MAN1C1   | 0.031762223 | 0.739401507 | 0.572368446 | 0.955179471 | 0.020834899 |
| PLCB2    | 0.02674174  | 0.808637791 | 0.67524432  | 0.968382936 | 0.020929398 |
| CCDC90B  | 0.004602258 | 1.329754012 | 1.042509858 | 1.696142938 | 0.021718952 |
| CBX3     | 0.016374991 | 1.345818677 | 1.042315564 | 1.737696311 | 0.022737391 |
| CACNA1D  | 0.041320529 | 0.766943202 | 0.608204376 | 0.967112205 | 0.024922931 |
| ELMO1    | 0.003851411 | 0.77020752  | 0.613011565 | 0.967713592 | 0.02497775  |
| PSMB6    | 0.009610775 | 1.361219884 | 1.038741282 | 1.783812395 | 0.025384425 |
| BIN2     | 0.02037405  | 0.806824291 | 0.66791385  | 0.974624852 | 0.02597534  |
| CEBPA    | 0.042085772 | 0.861070567 | 0.753582571 | 0.983890219 | 0.027899723 |
| DSP      | 0.043365352 | 1.12255188  | 1.012121033 | 1.245031652 | 0.028670042 |
| CD81     | 0.017532619 | 0.784995783 | 0.631821924 | 0.975303888 | 0.028834014 |
| PTK2B    | 0.048794168 | 0.790313446 | 0.639468535 | 0.976741323 | 0.029424904 |
| FBLN5    | 0.006211839 | 0.842754242 | 0.720859452 | 0.98526101  | 0.031853444 |
| TUBG1    | 0.001926231 | 1.252297476 | 1.019588004 | 1.538120262 | 0.031960361 |
| PTPN7    | 0.045858515 | 0.806825682 | 0.662661847 | 0.98235274  | 0.032577933 |
| RALGPS2  | 0.019528207 | 1.284763307 | 1.018645615 | 1.620403337 | 0.03434768  |
| SLC22A17 | 0.033232019 | 0.836828005 | 0.70926402  | 0.987334885 | 0.034771404 |
| ECE2     | 0.024829003 | 1.271083468 | 1.017293218 | 1.588188297 | 0.034785835 |
| FLI1     | 0.009818162 | 0.777658772 | 0.613065627 | 0.986441156 | 0.038221262 |
| FYN      | 0.049419978 | 0.811923559 | 0.665774867 | 0.990154327 | 0.039620574 |
| FAM129A  | 0.008783242 | 0.856453441 | 0.737727304 | 0.994286768 | 0.041828939 |

NINJ1

0.018987155

0.796490929

0.635762401

0.997853599

0.04785556

---

**Table S3. Candidate research for comparison to our signature.**

| <b>Authors</b>        | <b>Published online date</b> | <b>PubMed ID</b> | <b>Signature found</b> | <b>Gene-signature composition</b>                                                 | <b>Equation</b>                                                                                                                                                                                                                      |
|-----------------------|------------------------------|------------------|------------------------|-----------------------------------------------------------------------------------|--------------------------------------------------------------------------------------------------------------------------------------------------------------------------------------------------------------------------------------|
| Zhong, Haihui, et al. | 2021 Sep 1                   | 34540825         | 9-gene signature       | CBFA2T3<br>CR2<br>SEL1L3<br>TM6SF1<br>TSPAN32<br>ITGA6<br>MAPK11<br>RASA3<br>TLR6 | risk score = CBFA2T3 * (-0.283625763) + CR2 * (-0.162111327) + SEL1L3 * (-0.231743871) + TM6SF1 * (-0.527168072) + TSPAN32 * (-0.614785144) + ITGA6 * (-0.169271203) + MAPK11 * 0.528539595 + RASA3 * 0.323227079 + TLR6 * 0.3453755 |
| Xu, Qian, et al.      | 2021 Jul 2                   | 34277626         | 6-gene signature       | APOC3<br>EPOR<br>H2AFX<br>MXD1<br>PLCG2<br>YWHAZ                                  | risk score = APOC3 × 0.043262193 + EPOR × (-0.056851922) + H2AFX × 0.008373958 + MXD1 × 0.043730173 + PLCG2 × (-0.095876138) + YWHAZ × 0.003148576                                                                                   |
| Cheng, Yang, et al.   | 2021 Jun 24                  | 34249701         | 5-gene signature       | KIF20A<br>KLF4<br>KRT6A<br>LIFR<br>RGS13                                          | risk score = KIF20A * 0.3013 + KLF4 * 0.2402 + KRT6A * 0.0859 + LIFR * (-0.1823) + RGS13 * (-1.100)                                                                                                                                  |

|                            |             |          |                   |                                                                                                                                    |                                                                                                                                                                                                                                                                                                                                                                                                                                                                                           |
|----------------------------|-------------|----------|-------------------|------------------------------------------------------------------------------------------------------------------------------------|-------------------------------------------------------------------------------------------------------------------------------------------------------------------------------------------------------------------------------------------------------------------------------------------------------------------------------------------------------------------------------------------------------------------------------------------------------------------------------------------|
| Zhang,<br>Anran,<br>et al. | 2021 Jun 24 | 34249899 | 15-gene signature | RELA<br>ACSL3<br>YWHAE<br>EIF2S1<br>CISD1<br>DDIT4<br>RRM2<br>PANX1<br>TLR4<br>ARNTL<br>LPIN1<br>HERPUD1<br>NCOA4<br>PEBP1<br>GLS2 | $\text{risk score} = \text{RELA} * 0.31121564 + \text{ACSL3} * 0.292079905 + \text{YWHAE} * 0.160823922 + \text{EIF2S1} * 0.159470859 + \text{CISD1} * 0.156274215 + \text{DDIT4} * 0.079830296 + \text{RRM2} * 0.043449128 + \text{PANX1} * 0.013029525 + \text{TLR4} * (-0.010188709) + \text{ARNTL} * (-0.052913519) + \text{LPIN1} * (-0.179354454) + \text{HERPUD1} * (-0.213560347) + \text{NCOA4} * (-0.253508649) + \text{PEBP1} * (-0.262091825) + \text{GLS2} * (-0.267566406)$ |
| Chen,<br>Fangyu,<br>et al. | 2021 Jun 4  | 34150632 | 8-gene signature  | ACVR1B<br>BIRC5<br>NR2E1<br>INSR<br>TGFA<br>BMP7<br>CD28<br>NUDT6                                                                  | $\text{risk score} = \text{ACVR1B} * (-0.1831) + \text{BIRC5} * 0.1300 + \text{NR2E1} * 0.1798 + \text{INSR} * (-0.2200) + \text{TGFA} * 0.1697 + \text{BMP7} * 0.1577 + \text{CD28} * (-0.2649) + \text{NUDT6} * 0.2473$                                                                                                                                                                                                                                                                 |

|                     |             |          |                   |                                                                                      |                                                                                                                                                                                  |
|---------------------|-------------|----------|-------------------|--------------------------------------------------------------------------------------|----------------------------------------------------------------------------------------------------------------------------------------------------------------------------------|
| Jiang, Wei, et al.  | 2021 Mar 18 | 33869220 | 10-gene signature | PKMYT1<br>ETF1<br>ECT2<br>BUB1B<br>RECQL4<br>TFRC<br>COCH<br>TUBB2B<br>PITX1<br>CDC6 | risk score = PKMYT1 * (-0.212) + ETF1 * (-0.655) + ECT2 * 0.22 + BUB1B * 0.178 + RECQL4 * 0.099 + TFRC * 0.106 + COCH * 0.042 + TUBB2B * (-0.119) + PITX1 * 0.094 + CDC6 * 0.122 |
| Wang, Yan, et al.   | 2021 Feb 8  | 33628734 | 4-gene signature  | CD69<br>KLRB1<br>PLCB2<br>P2RY13                                                     | risk score = CD69 * (-0.03437) + KLRB1 * (-0.06325) + PLCB2 * (-0.0434) + P2RY13 * (-0.11558)                                                                                    |
| Zhang, Yuan, et al. | 2020 Oct 27 | 33194633 | 3-gene signature  | RELA<br>CYCS<br>FADD                                                                 | risk score = RELA * 5.0637 + CYCS * 2.5219 + FADD * 0.0003                                                                                                                       |

---

**Table S4. The Spearman coefficient assessed the correlations of risk score and the 22 TICs.**

| <b>TIC</b>                   | <b>r</b>    | <b>p-value</b> |
|------------------------------|-------------|----------------|
| T cells CD4 memory resting   | -0.32388583 | 1.13E-13       |
| Mast cells resting           | -0.32271729 | 1.39E-13       |
| Dendritic cells resting      | -0.24035849 | 5.30E-08       |
| Monocytes                    | -0.19706697 | 9.03E-06       |
| Plasma cells                 | -0.12625893 | 0.00469141     |
| T cells regulatory (Tregs)   | -0.11871295 | 0.00787785     |
| B cells memory               | -0.11712731 | 0.00875386     |
| B cells naive                | -0.06761287 | 0.13109094     |
| T cells gamma delta          | -0.02993084 | 0.50429419     |
| Macrophages M2               | 0.017053316 | 0.70355433     |
| T cells CD4 naive            | 0.027845874 | 0.53445835     |
| Eosinophils                  | 0.050938853 | 0.25557393     |
| NK cells activated           | 0.05338664  | 0.23340885     |
| Macrophages M1               | 0.08369091  | 0.06148611     |
| Dendritic cells activated    | 0.094668955 | 0.03431769     |
| NK cells resting             | 0.097345223 | 0.02952323     |
| T cells CD8                  | 0.122005832 | 0.00633263     |
| T cells follicular helper    | 0.146199073 | 0.00104338     |
| Neutrophils                  | 0.168647316 | 0.00015138     |
| Mast cells activated         | 0.212236759 | 1.68E-06       |
| T cells CD4 memory activated | 0.229710015 | 2.07E-07       |
| Macrophages M0               | 0.340625248 | 4.76E-15       |

**Table S5. The Kaplan–Meier curves measured the prognostic abilities of the 22 TICs.**

| <b>TIC</b>                   | <b>P-value</b> |
|------------------------------|----------------|
| B cells naive                | 0.73195573     |
| B cells memory               | 0.14526478     |
| Plasma cells                 | 0.07168164     |
| T cells CD8                  | 0.94945777     |
| T cells CD4 naive            | 0.15157197     |
| T cells CD4 memory resting   | 0.98342753     |
| T cells CD4 memory activated | 0.06333732     |
| T cells follicular helper    | 0.61289909     |
| T cells regulatory (Tregs)   | 0.57035866     |
| T cells gamma delta          | 0.87726184     |
| NK cells resting             | 0.42005935     |
| NK cells activated           | 0.65030923     |
| Monocytes                    | 0.34777235     |
| Macrophages M0               | 0.15773795     |
| Macrophages M1               | 0.07390928     |
| Macrophages M2               | 0.25109349     |
| Dendritic cells resting      | 0.04434603     |
| Dendritic cells activated    | 0.67117819     |
| Mast cells resting           | 0.0001638      |
| Mast cells activated         | 0.00810307     |
| Eosinophils                  | 0.60211224     |
| Neutrophils                  | 0.9221555      |
